# Supplementary material for: Evolutionary dynamics of polyadenylation signals and their recognition strategies in protists
Source: HighWire-hosted journal article supplement (doi:10.1101/gr.279526.124), 2024-09-26
Supplement: Supplemental_Fig_S2.pdf [file Supplemental_Fig_S2.pdf]

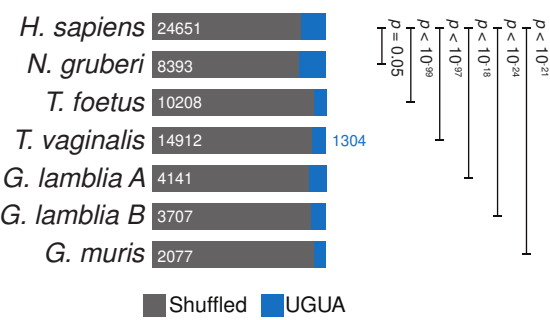

**Supplemental Figure S2. Occurrences of UGUA tetramer in humans and protists (related to Figure 3).** Barplot of the fraction of sites with the UGUA tetramer in comparison to its shuffled version in the region 20-50 nt upstream from the cleavage site for human and 6 protists. Statistical significance was calculated using the chi square test.
