# Supplementary material for: Evolutionary dynamics of polyadenylation signals and their recognition strategies in protists
Source: HighWire-hosted journal article supplement (doi:10.1101/gr.279526.124), 2024-09-26
Supplement: Supplemental_Table_S1.xlsx [file Supplemental_Table_S1.xlsx]

## Sheet: Legend
Supplemental Table S1. 3’UTR annotation in analyzed protist species.
3’UTR annotation summary.
Comparison between already annotated 3’UTR and ones annotated in this study presented in Supplemental Figure S1E.
<organism name> 3’UTR annotation
List of all annotated 3’UTRs.
chrom	chromosome
3'utr_start	start coordinate (1-based)
3'utr_end	end coordinate
strand	strand
3'utr_length	length of the annotated 3’UTR
gene_id	gene id from gtf file
description	gene description from gtf file
source	previous annotation source or this study
alternative_polyadentlation	existence of alternatively polyadenylated isoform for a given gene

## Sheet: 3'UTR annotation summary
Organism	Genome_version	Already_annotated_3’UTRS	Newly_annotated_3’UTRs	Newly_annotated_3’UTR_isoforms
Entamoeba histolitica	Entamoeba_histolytica.JCVI-ESG2-1.0.dna_rm.toplevel	844	2201	157
Naegleria gruberi	Naegleria_gruberi_gca_000004985.V1.0.dna_rm.toplevel	3794	1409	216
Trichomonas vaginalis	TrichDB-56_TvaginalisG3	6932	1471	914
Tritrichomonas foetus	TrichDB-56_TfoetusK	0	5867	179
Giardia lamblia A	GiardiaDB-56_GintestinalisAssemblageAWB	1	3125*	160*
Giardia lamblia B	GiardiaDB-56_GintestinalisAssemblageBGS	0	2630	114
Giardia muris	GiardiaDB-56_GmurisRobertsThomson	93	2149	101
*together with 3’UTRs annotated in Bilodeau et al. 2022 doi: 10.1261/rna.078793.121

## Sheet: E. histolitica 3'UTR annotation
chrom	3'utr_start	3'utr_end	strand	3'utr_length	gene_id	description	source	alternative_polyadentlation
DS571145	49704	49754	-	50	EHI_151390		amoebadb	no
DS571145	112582	112582	-	0	EHI_151660		amoebadb	no
DS571145	152051	152075	+	24	EHI_151810		amoebadb	no
DS571145	175207	175593	+	386	EHI_151920		amoebadb	no
DS571145	187186	187205	+	19	EHI_151990		amoebadb	no
DS571145	206010	206024	-	14	EHI_152080		amoebadb	no
DS571145	229493	229505	+	12	EHI_152210		amoebadb	no
DS571145	248734	248757	+	23	EHI_152340		amoebadb	no
DS571145	270900	270920	-	20	EHI_152450		amoebadb	no
DS571145	279984	279997	+	13	EHI_152510		amoebadb	no
DS571145	285168	285174	+	6	EHI_152560		amoebadb	no
DS571145	286013	286063	+	50	EHI_152570		amoebadb	no
DS571145	292548	292564	-	16	EHI_152610		amoebadb	no
DS571145	323515	323531	-	16	EHI_152770		amoebadb	no
DS571145	326259	326289	+	30	EHI_152780		amoebadb	no
DS571145	359792	359847	-	55	EHI_152970		amoebadb	yes
DS571145	380234	380255	+	21	EHI_153060		amoebadb	no
DS571145	381937	381958	+	21	EHI_153070		amoebadb	no
DS571145	384355	384392	+	37	EHI_153090		amoebadb	yes
DS571145	405433	405451	+	18	EHI_153190		amoebadb	no
DS571145	415062	415075	-	13	EHI_153260		amoebadb	no
DS571145	427074	427101	+	27	EHI_153320		amoebadb	no
DS571145	427676	427692	+	16	EHI_153330		amoebadb	no
DS571145	445577	445591	-	14	EHI_153430		amoebadb	no
DS571145	488294	488321	+	27	EHI_153690		amoebadb	no
DS571146	12108	12111	-	3	EHI_148060		amoebadb	no
DS571146	32130	32152	+	22	EHI_148190		amoebadb	no
DS571146	38833	38854	+	21	EHI_148230		amoebadb	no
DS571146	39580	39609	+	29	EHI_148240		amoebadb	no
DS571146	49603	49625	-	22	EHI_148280		amoebadb	no
DS571146	57821	57841	-	20	EHI_148320		amoebadb	no
DS571146	93223	93236	+	13	EHI_148520		amoebadb	no
DS571146	103429	103445	-	16	EHI_148560		amoebadb	no
DS571146	118248	118294	+	46	EHI_148610		amoebadb	no
DS571146	157903	157934	-	31	EHI_148790		amoebadb	no
DS571146	167120	167145	-	25	EHI_148820		amoebadb	no
DS571146	171087	171138	+	51	EHI_148850		amoebadb	no
DS571146	202650	202669	+	19	EHI_149000		amoebadb	no
DS571147	20786	20820	+	34	EHI_044590		amoebadb	no
DS571147	22414	22438	+	24	EHI_044610		amoebadb	no
DS571147	42464	42510	+	46	EHI_044740		amoebadb	yes
DS571147	49958	49994	-	36	EHI_044810		amoebadb	no
DS571147	51653	51682	+	29	EHI_044830		amoebadb	no
DS571147	80034	80056	+	22	EHI_045000		amoebadb	no
DS571147	83834	83849	+	15	EHI_045030		amoebadb	no
DS571147	128131	128170	+	39	EHI_045300		amoebadb	no
DS571147	166972	166991	-	19	EHI_045540		amoebadb	no
DS571148	23098	23115	-	17	EHI_011870		amoebadb	no
DS571148	23966	23995	-	29	EHI_011880		amoebadb	no
DS571148	49660	49674	-	14	EHI_012020		amoebadb	no
DS571148	82836	82879	+	43	EHI_012240		amoebadb	no
DS571148	91401	91432	-	31	EHI_012280		amoebadb	no
DS571148	121860	121893	-	33	EHI_012360		amoebadb	no
DS571148	146996	147068	-	72	EHI_012480		amoebadb	no
DS571148	170978	171001	-	23	EHI_012570		amoebadb	no
DS571149	679	855	-	176	EHI_050100		amoebadb	no
DS571149	13019	13100	-	81	EHI_050270		amoebadb	no
DS571149	15553	15572	+	19	EHI_050280		amoebadb	no
DS571149	17350	17362	-	12	EHI_050310		amoebadb	no
DS571149	26084	26099	-	15	EHI_050360		amoebadb	no
DS571149	55397	55434	+	37	EHI_050520		amoebadb	no
DS571149	61716	61725	+	9	EHI_050550		amoebadb	yes
DS571149	62944	62993	+	49	EHI_050560		amoebadb	no
DS571149	102594	102615	-	21	EHI_050740		amoebadb	no
DS571149	118713	118718	+	5	EHI_050810		amoebadb	no
DS571149	139039	139108	+	69	EHI_050900		amoebadb	no
DS571149	146652	146696	-	44	EHI_050940		amoebadb	no
DS571149	150509	150539	+	30	EHI_050950		amoebadb	no
DS571149	153295	153334	+	39	EHI_050960		amoebadb	no
DS571149	170508	170548	-	40	EHI_051050		amoebadb	no
DS571149	175448	175473	+	25	EHI_051060		amoebadb	no
DS571150	7387	7418	+	31	EHI_067850		amoebadb	no
DS571150	26095	26101	-	6	EHI_067940		amoebadb	no
DS571150	78162	78174	-	12	EHI_068170		amoebadb	no
DS571150	82231	82256	+	25	EHI_068200		amoebadb	no
DS571150	82322	82337	-	15	EHI_068210		amoebadb	no
DS571150	84894	84909	+	15	EHI_068230		amoebadb	no
DS571150	130425	130748	-	323	EHI_068500		amoebadb	yes
DS571150	164171	164343	+	172	EHI_068660		amoebadb	yes
DS571150	164981	164997	+	16	EHI_068670		amoebadb	no
DS571151	39908	40135	+	227	EHI_110280		amoebadb	no
DS571151	44600	44622	-	22	EHI_110320		amoebadb	no
DS571151	48445	48485	+	40	EHI_110340		amoebadb	no
DS571151	59862	59887	+	25	EHI_110400		amoebadb	no
DS571151	105609	105624	-	15	EHI_110570		amoebadb	no
DS571151	115320	115328	+	8	EHI_110620		amoebadb	no
DS571151	136163	136181	-	18	EHI_110730		amoebadb	no
DS571151	158270	158678	+	408	EHI_110810		amoebadb	yes
DS571152	11720	11738	+	18	EHI_049330		amoebadb	no
DS571152	14389	14403	+	14	EHI_049350		amoebadb	no
DS571152	69008	69032	-	24	EHI_049620		amoebadb	yes
DS571152	84145	84168	-	23	EHI_049670		amoebadb	no
DS571152	93757	93786	-	29	EHI_049690		amoebadb	no
DS571152	103221	103267	-	46	EHI_049720		amoebadb	no
DS571152	165113	165142	+	29	EHI_050000		amoebadb	no
DS571153	31058	31078	+	20	EHI_022890		amoebadb	no
DS571153	33082	33100	-	18	EHI_022930		amoebadb	no
DS571153	43792	43802	+	10	EHI_022970		amoebadb	no
DS571153	63436	63439	-	3	EHI_023060		amoebadb	no
DS571153	64238	64259	-	21	EHI_023070		amoebadb	no
DS571153	71349	71372	-	23	EHI_023110		amoebadb	no
DS571153	94547	94576	-	29	EHI_023230		amoebadb	no
DS571153	132589	132602	-	13	EHI_023410		amoebadb	no
DS571154	20528	20570	+	42	EHI_178470		amoebadb	no
DS571154	20607	20616	-	9	EHI_178480		amoebadb	no
DS571154	23793	23818	+	25	EHI_178490		amoebadb	no
DS571154	37705	37760	+	55	EHI_178560		amoebadb	no
DS571154	55594	55612	-	18	EHI_178620		amoebadb	no
DS571154	107385	107408	+	23	EHI_178890		amoebadb	no
DS571154	109284	109306	-	22	EHI_178910		amoebadb	no
DS571154	115223	115241	-	18	EHI_178960		amoebadb	no
DS571154	126209	126231	+	22	EHI_179000		amoebadb	no
DS571155	23007	23037	+	30	EHI_092140		amoebadb	no
DS571155	104466	104482	-	16	EHI_092430		amoebadb	no
DS571155	119569	119588	-	19	EHI_092520		amoebadb	no
DS571155	137781	137801	+	20	EHI_092640		amoebadb	no
DS571156	3521	3537	-	16	EHI_182460		amoebadb	no
DS571156	17176	17192	-	16	EHI_182550		amoebadb	no
DS571156	22306	22321	-	15	EHI_182600		amoebadb	no
DS571156	31560	31576	+	16	EHI_182670		amoebadb	no
DS571156	40235	40257	+	22	EHI_182730		amoebadb	no
DS571156	52114	52138	+	24	EHI_182800		amoebadb	no
DS571156	65331	65509	-	178	EHI_182900		amoebadb	yes
DS571156	68648	68671	-	23	EHI_182920		amoebadb	no
DS571156	84198	84238	-	40	EHI_182980		amoebadb	yes
DS571156	143326	143397	-	71	EHI_183250		amoebadb	yes
DS571157	17679	17714	-	35	EHI_196920		amoebadb	no
DS571157	41662	41680	-	18	EHI_197030		amoebadb	no
DS571157	62220	62283	+	63	EHI_197140		amoebadb	no
DS571157	129454	129480	-	26	EHI_197440		amoebadb	no
DS571157	137450	137452	+	2	EHI_197490		amoebadb	no
DS571158	14812	14813	+	1	EHI_103260		amoebadb	no
DS571158	39153	40854	+	1701	EHI_103400		amoebadb	no
DS571158	56805	56810	+	5	EHI_103520		amoebadb	no
DS571158	94141	94155	-	14	EHI_103680		amoebadb	no
DS571158	135589	135614	-	25	EHI_103860		amoebadb	no
DS571159	19596	19620	-	24	EHI_186470		amoebadb	no
DS571159	22291	22297	-	6	EHI_186480		amoebadb	no
DS571159	26338	26362	-	24	EHI_186720		amoebadb	no
DS571159	31984	32004	+	20	EHI_186750		amoebadb	no
DS571159	48495	49091	+	596	EHI_186830		amoebadb	yes
DS571159	63357	63376	+	19	EHI_186900		amoebadb	no
DS571159	79958	79979	+	21	EHI_187020		amoebadb	no
DS571159	101063	101107	-	44	EHI_187110		amoebadb	no
DS571159	111840	111864	+	24	EHI_187150		amoebadb	no
DS571160	21246	21262	+	16	EHI_125650		amoebadb	no
DS571160	38962	39016	-	54	EHI_125770		amoebadb	no
DS571160	40492	40505	-	13	EHI_125780		amoebadb	no
DS571160	49195	49214	+	19	EHI_125840		amoebadb	no
DS571160	75968	75989	-	21	EHI_125950		amoebadb	no
DS571160	105121	105154	+	33	EHI_126110		amoebadb	yes
DS571160	108466	108495	+	29	EHI_126140		amoebadb	no
DS571160	116527	116553	-	26	EHI_126190		amoebadb	no
DS571161	7041	7059	-	18	EHI_141330		amoebadb	no
DS571161	8639	8663	-	24	EHI_141340		amoebadb	no
DS571161	14806	14845	+	39	EHI_141350		amoebadb	no
DS571161	21389	21404	-	15	EHI_141400		amoebadb	no
DS571161	65807	65824	-	17	EHI_141940		amoebadb	no
DS571161	77633	77637	-	4	EHI_141990		amoebadb	no
DS571161	114136	114158	-	22	EHI_142210		amoebadb	no
DS571161	116713	116774	-	61	EHI_142220		amoebadb	yes
DS571161	122948	122966	-	18	EHI_142260		amoebadb	no
DS571162	35043	35075	+	32	EHI_155310		amoebadb	no
DS571162	43837	43850	-	13	EHI_155410		amoebadb	no
DS571162	48694	48712	+	18	EHI_155440		amoebadb	no
DS571162	79592	79614	+	22	EHI_155550		amoebadb	no
DS571162	106083	106095	-	12	EHI_155670		amoebadb	no
DS571163	32584	32604	+	20	EHI_096340		amoebadb	no
DS571163	34900	34920	+	20	EHI_096350		amoebadb	no
DS571163	37305	37309	+	4	EHI_096360		amoebadb	no
DS571163	46126	46397	-	271	EHI_096410		amoebadb	yes
DS571163	48909	48925	-	16	EHI_096440		amoebadb	no
DS571163	63269	63289	-	20	EHI_096530		amoebadb	yes
DS571163	69745	69788	-	43	EHI_096570		amoebadb	yes
DS571163	84061	84203	-	142	EHI_096650		amoebadb	yes
DS571163	127244	127275	+	31	EHI_096850		amoebadb	no
DS571164	15449	15470	-	21	EHI_069110		amoebadb	no
DS571164	21408	21423	+	15	EHI_069130		amoebadb	no
DS571164	63784	64343	-	559	EHI_069320		amoebadb	no
DS571164	67292	67329	-	37	EHI_069350		amoebadb	no
DS571164	72758	72773	+	15	EHI_069390		amoebadb	no
DS571164	104350	104367	+	17	EHI_069490		amoebadb	no
DS571164	120178	120201	+	23	EHI_069560		amoebadb	no
DS571165	5267	5307	-	40	EHI_198580		amoebadb	no
DS571165	25719	25780	-	61	EHI_198670		amoebadb	yes
DS571165	34741	34756	+	15	EHI_198740		amoebadb	no
DS571165	36623	36632	+	9	EHI_198750		amoebadb	no
DS571165	75182	75209	+	27	EHI_198930		amoebadb	yes
DS571165	94320	94336	+	16	EHI_199000		amoebadb	no
DS571165	111750	111772	+	22	EHI_199110		amoebadb	no
DS571166	10878	10898	-	20	EHI_126920		amoebadb	no
DS571166	26347	26397	-	50	EHI_127020		amoebadb	no
DS571166	49529	49551	-	22	EHI_127160		amoebadb	no
DS571166	56919	56944	-	25	EHI_127200		amoebadb	no
DS571166	79585	79605	-	20	EHI_127310		amoebadb	no
DS571166	85938	86016	-	78	EHI_127330		amoebadb	yes
DS571166	89916	90133	-	217	EHI_127360		amoebadb	yes
DS571167	8190	8216	-	26	EHI_159150		amoebadb	no
DS571167	9709	9732	-	23	EHI_159160		amoebadb	no
DS571167	29121	29143	-	22	EHI_159450		amoebadb	no
DS571167	33429	33461	-	32	EHI_159480		amoebadb	no
DS571167	51605	51625	+	20	EHI_159620		amoebadb	no
DS571167	74436	74511	+	75	EHI_159750		amoebadb	no
DS571167	88110	88185	+	75	EHI_159770		amoebadb	no
DS571167	89457	89495	-	38	EHI_159790		amoebadb	no
DS571167	93709	93755	+	46	EHI_159830		amoebadb	no
DS571168	101466	101491	-	25	EHI_013250		amoebadb	no
DS571168	103508	103537	+	29	EHI_013260		amoebadb	no
DS571169	1983	2015	-	32	EHI_098180		amoebadb	no
DS571169	23158	23200	-	42	EHI_098280		amoebadb	no
DS571169	26348	26357	+	9	EHI_098290		amoebadb	no
DS571169	68753	68767	+	14	EHI_098420		amoebadb	no
DS571169	101631	101659	-	28	EHI_098570		amoebadb	yes
DS571170	15042	15065	-	23	EHI_130700		amoebadb	no
DS571170	19611	19855	+	244	EHI_130720		amoebadb	yes
DS571170	42093	42131	-	38	EHI_130930		amoebadb	no
DS571170	45231	45272	-	41	EHI_130960		amoebadb	no
DS571170	65463	65479	+	16	EHI_131040		amoebadb	no
DS571170	82387	82399	+	12	EHI_131130		amoebadb	no
DS571170	91083	91118	+	35	EHI_131190		amoebadb	no
DS571170	95269	95324	-	55	EHI_131230		amoebadb	yes
DS571171	13203	13217	-	14	EHI_073350		amoebadb	no
DS571171	13936	13947	-	11	EHI_073360		amoebadb	no
DS571171	59218	59240	+	22	EHI_073580		amoebadb	no
DS571171	92034	92062	+	28	EHI_073650		amoebadb	yes
DS571172	8685	8701	+	16	EHI_013890		amoebadb	no
DS571172	8974	8993	-	19	EHI_013895		amoebadb	yes
DS571172	33882	33894	-	12	EHI_014000		amoebadb	no
DS571172	38735	38752	-	17	EHI_014030		amoebadb	no
DS571172	49264	49268	-	4	EHI_014080		amoebadb	no
DS571172	107106	107132	+	26	EHI_014400		amoebadb	no
DS571173	9324	9325	+	1	EHI_087310		amoebadb	no
DS571173	30230	30248	-	18	EHI_087540		amoebadb	no
DS571173	60610	60685	-	75	EHI_087720		amoebadb	yes
DS571174	19430	19458	+	28	EHI_035440		amoebadb	no
DS571174	21763	21777	+	14	EHI_035460		amoebadb	no
DS571174	32673	32685	+	12	EHI_035510		amoebadb	no
DS571174	35391	35429	-	38	EHI_035530		amoebadb	no
DS571174	53763	53782	-	19	EHI_035600		amoebadb	no
DS571174	63203	63216	-	13	EHI_035660		amoebadb	no
DS571174	68100	68166	-	66	EHI_035690		amoebadb	yes
DS571174	84053	84061	+	8	EHI_035760		amoebadb	no
DS571174	89745	89764	-	19	EHI_035800		amoebadb	no
DS571175	4758	4769	+	11	EHI_176970		amoebadb	no
DS571175	26006	26113	-	107	EHI_177190		amoebadb	yes
DS571175	42455	42456	-	1	EHI_177340		amoebadb	no
DS571175	51067	51068	+	1	EHI_177400		amoebadb	no
DS571175	71220	71240	+	20	EHI_177520		amoebadb	no
DS571175	88183	88358	-	175	EHI_177630		amoebadb	yes
DS571175	89496	89519	-	23	EHI_177640		amoebadb	no
DS571176	25699	25707	+	8	EHI_051470		amoebadb	no
DS571176	31582	31626	-	44	EHI_051720		amoebadb	no
DS571176	59391	59396	+	5	EHI_051840		amoebadb	no
DS571176	89244	89278	+	34	EHI_051930		amoebadb	no
DS571177	20688	20726	+	38	EHI_166850		amoebadb	no
DS571177	67724	67745	-	21	EHI_167050		amoebadb	no
DS571177	73838	73882	-	44	EHI_167090		amoebadb	yes
DS571178	5137	5153	-	16	EHI_007480		amoebadb	no
DS571178	34995	35011	+	16	EHI_007930		amoebadb	no
DS571178	46989	47024	+	35	EHI_008010		amoebadb	no
DS571178	67270	67291	+	21	EHI_008090		amoebadb	no
DS571178	86923	86943	+	20	EHI_008200		amoebadb	no
DS571178	95072	95091	+	19	EHI_008240		amoebadb	no
DS571179	4475	4513	+	38	EHI_093580		amoebadb	no
DS571179	14172	14187	+	15	EHI_093740		amoebadb	no
DS571179	27425	27455	+	30	EHI_093820		amoebadb	no
DS571179	54063	54209	-	146	EHI_093920		amoebadb	no
DS571179	87083	87115	-	32	EHI_094120		amoebadb	no
DS571180	20232	20269	-	37	EHI_118490		amoebadb	no
DS571180	38961	38971	-	10	EHI_118640		amoebadb	no
DS571180	50646	50665	+	19	EHI_118700		amoebadb	no
DS571180	55249	55267	+	18	EHI_118750		amoebadb	no
DS571180	76652	76668	-	16	EHI_118840		amoebadb	no
DS571181	33377	33397	+	20	EHI_004370		amoebadb	no
DS571181	44737	44773	+	36	EHI_004430		amoebadb	no
DS571181	62871	62896	+	25	EHI_004510		amoebadb	no
DS571181	70981	71016	-	35	EHI_004550		amoebadb	yes
DS571182	17497	17527	+	30	EHI_010350		amoebadb	no
DS571182	29803	29919	+	116	EHI_010510		amoebadb	yes
DS571182	29963	29986	-	23	EHI_010520		amoebadb	no
DS571182	43369	43392	+	23	EHI_010570		amoebadb	no
DS571182	58428	58578	+	150	EHI_010620		amoebadb	no
DS571182	63451	63469	+	18	EHI_010650		amoebadb	no
DS571182	73267	73294	+	27	EHI_010710		amoebadb	no
DS571183	10406	10505	+	99	EHI_117850		amoebadb	yes
DS571183	22850	22890	-	40	EHI_117920		amoebadb	yes
DS571183	27743	27759	-	16	EHI_117960		amoebadb	no
DS571183	31424	31436	+	12	EHI_117970		amoebadb	no
DS571183	39468	39528	+	60	EHI_118040		amoebadb	no
DS571183	58069	58215	+	146	EHI_118130		amoebadb	yes
DS571183	64795	64825	-	30	EHI_118180		amoebadb	no
DS571183	76069	76074	-	5	EHI_118260		amoebadb	no
DS571183	82753	82773	+	20	EHI_118270		amoebadb	no
DS571184	37830	37847	+	17	EHI_009510		amoebadb	no
DS571184	71717	71776	-	59	EHI_009620		amoebadb	no
DS571184	86188	86204	-	16	EHI_009680		amoebadb	no
DS571185	12423	12435	+	12	EHI_104360		amoebadb	no
DS571185	43301	43336	-	35	EHI_104520		amoebadb	yes
DS571185	70889	70910	+	21	EHI_104660		amoebadb	no
DS571186	3552	4387	+	835	EHI_000250		amoebadb	yes
DS571186	17026	17051	-	25	EHI_000440		amoebadb	no
DS571186	34641	34674	-	33	EHI_000510		amoebadb	yes
DS571186	45601	45625	-	24	EHI_000590		amoebadb	no
DS571186	49711	49727	+	16	EHI_000610		amoebadb	no
DS571186	58011	58031	+	20	EHI_000690		amoebadb	no
DS571186	73252	73271	-	19	EHI_000730		amoebadb	no
DS571186	84982	85020	-	38	EHI_000790		amoebadb	yes
DS571186	85842	85860	-	18	EHI_000800		amoebadb	no
DS571187	20238	20391	+	153	EHI_137700		amoebadb	yes
DS571187	22620	22639	+	19	EHI_137720		amoebadb	no
DS571187	52298	52330	+	32	EHI_137870		amoebadb	no
DS571187	71754	71823	-	69	EHI_137970		amoebadb	yes
DS571187	80756	80796	-	40	EHI_138040		amoebadb	no
DS571188	33615	33615	-	0	EHI_124420		amoebadb	no
DS571188	57545	57562	-	17	EHI_124520		amoebadb	no
DS571188	71165	71179	-	14	EHI_124580		amoebadb	no
DS571188	76749	77560	+	811	EHI_124610		amoebadb	yes
DS571189	35353	35392	-	39	EHI_174910		amoebadb	yes
DS571189	48892	48908	-	16	EHI_174950		amoebadb	no
DS571189	54695	54709	-	14	EHI_175020		amoebadb	no
DS571189	62321	62337	+	16	EHI_175050		amoebadb	no
DS571189	65696	65720	-	24	EHI_175090		amoebadb	no
DS571190	8153	8183	-	30	EHI_038580		amoebadb	no
DS571190	8887	8905	-	18	EHI_038590		amoebadb	no
DS571190	29346	29401	+	55	EHI_038820		amoebadb	yes
DS571190	37159	37183	+	24	EHI_038860		amoebadb	no
DS571190	71832	71854	-	22	EHI_039010		amoebadb	no
DS571191	1714	1863	+	149	EHI_194040		amoebadb	yes
DS571191	20825	20854	-	29	EHI_194270		amoebadb	no
DS571191	40340	40416	+	76	EHI_194390		amoebadb	no
DS571191	57247	57616	+	369	EHI_194520		amoebadb	yes
DS571191	61166	61203	+	37	EHI_194540		amoebadb	no
DS571192	24194	24221	+	27	EHI_065630		amoebadb	no
DS571192	28496	28497	-	1	EHI_065650		amoebadb	no
DS571192	52808	52828	+	20	EHI_065750		amoebadb	no
DS571192	60478	60493	+	15	EHI_065790		amoebadb	no
DS571192	62587	62597	-	10	EHI_065820		amoebadb	no
DS571192	72235	72250	+	15	EHI_065870		amoebadb	no
DS571192	73775	73841	+	66	EHI_065880		amoebadb	no
DS571193	39206	39233	+	27	EHI_134640		amoebadb	no
DS571193	42875	42892	-	17	EHI_134680		amoebadb	no
DS571193	61701	61756	-	55	EHI_134780		amoebadb	no
DS571193	67083	67119	+	36	EHI_134810		amoebadb	no
DS571193	73750	73785	+	35	EHI_134830		amoebadb	no
DS571194	841	876	-	35	EHI_021190		amoebadb	no
DS571194	41495	41512	+	17	EHI_021360		amoebadb	no
DS571194	73963	74020	+	57	EHI_021560		amoebadb	yes
DS571195	32689	32698	-	9	EHI_004880		amoebadb	no
DS571195	52206	52230	-	24	EHI_005020		amoebadb	no
DS571195	57895	57915	-	20	EHI_005060		amoebadb	no
DS571196	7347	7369	+	22	EHI_064310		amoebadb	no
DS571196	25364	25396	+	32	EHI_064470		amoebadb	no
DS571196	45420	45442	+	22	EHI_064570		amoebadb	no
DS571196	62539	62567	-	28	EHI_064670		amoebadb	no
DS571197	7148	7188	-	40	EHI_006670		amoebadb	no
DS571197	30294	30294	-	0	EHI_006800		amoebadb	no
DS571197	32486	32506	+	20	EHI_006810		amoebadb	no
DS571197	40363	40377	-	14	EHI_006860		amoebadb	no
DS571197	48434	48468	+	34	EHI_006900		amoebadb	no
DS571197	51927	51945	+	18	EHI_006930		amoebadb	no
DS571197	57511	57545	-	34	EHI_006980		amoebadb	no
DS571197	72403	72418	+	15	EHI_007030		amoebadb	no
DS571198	26513	26533	-	20	EHI_024470		amoebadb	no
DS571198	72793	72834	+	41	EHI_024680		amoebadb	yes
DS571199	33049	33149	-	100	EHI_008610		amoebadb	yes
DS571199	34671	34690	-	19	EHI_008620		amoebadb	no
DS571199	55265	55281	-	16	EHI_008730		amoebadb	no
DS571200	16864	16885	-	21	EHI_009870		amoebadb	no
DS571200	31585	31601	+	16	EHI_009940		amoebadb	no
DS571200	46226	46443	+	217	EHI_010020		amoebadb	yes
DS571201	6622	6677	-	55	EHI_100110		amoebadb	yes
DS571201	68505	68539	-	34	EHI_100490		amoebadb	no
DS571202	28985	29019	-	34	EHI_015290		amoebadb	no
DS571202	31479	31501	-	22	EHI_015310		amoebadb	no
DS571202	32317	32334	+	17	EHI_015320		amoebadb	no
DS571202	63716	63743	+	27	EHI_015440		amoebadb	no
DS571203	32559	32575	+	16	EHI_135060		amoebadb	no
DS571203	35513	35551	+	38	EHI_135080		amoebadb	no
DS571203	35767	35793	-	26	EHI_135090		amoebadb	no
DS571204	30675	30697	+	22	EHI_105180		amoebadb	no
DS571204	51813	51879	-	66	EHI_105330		amoebadb	no
DS571204	55890	55907	-	17	EHI_105350		amoebadb	no
DS571204	72266	72267	+	1	EHI_105370		amoebadb	no
DS571205	12386	12411	+	25	EHI_107010		amoebadb	no
DS571205	29925	29953	-	28	EHI_107120		amoebadb	no
DS571205	32732	32733	+	1	EHI_107130		amoebadb	no
DS571205	37650	37664	-	14	EHI_107170		amoebadb	no
DS571205	55777	55843	-	66	EHI_107250		amoebadb	no
DS571205	61941	62460	-	519	EHI_107290		amoebadb	yes
DS571205	71794	71795	+	1	EHI_107340		amoebadb	no
DS571206	20151	20169	-	18	EHI_188080		amoebadb	no
DS571206	36760	36775	+	15	EHI_188150		amoebadb	no
DS571206	37608	37624	+	16	EHI_188160		amoebadb	no
DS571206	38979	38997	+	18	EHI_188170		amoebadb	no
DS571206	41665	41668	+	3	EHI_188180		amoebadb	no
DS571207	24022	24060	-	38	EHI_169900		amoebadb	no
DS571207	46827	46887	+	60	EHI_170050		amoebadb	no
DS571208	5097	5360	+	263	EHI_030710		amoebadb	yes
DS571208	13691	13716	+	25	EHI_030750		amoebadb	no
DS571208	14269	14312	-	43	EHI_030760		amoebadb	no
DS571208	35080	35105	+	25	EHI_030790		amoebadb	no
DS571208	36174	36583	+	409	EHI_030800		amoebadb	yes
DS571208	37797	37825	+	28	EHI_030810		amoebadb	no
DS571208	38575	38597	+	22	EHI_030820		amoebadb	no
DS571209	22615	22692	-	77	EHI_192450		amoebadb	no
DS571209	42766	42767	+	1	EHI_192530		amoebadb	no
DS571209	46417	46424	-	7	EHI_192560		amoebadb	no
DS571209	66172	66199	+	27	EHI_192630		amoebadb	no
DS571210	40537	40554	+	17	EHI_001070		amoebadb	no
DS571210	50301	50315	+	14	EHI_001130		amoebadb	no
DS571211	40355	40372	-	17	EHI_084960		amoebadb	no
DS571212	25341	25376	+	35	EHI_133900		amoebadb	no
DS571214	57569	57586	-	17	EHI_164510		amoebadb	no
DS571215	8462	8485	-	23	EHI_027380		amoebadb	no
DS571215	12224	12275	-	51	EHI_027490		amoebadb	yes
DS571215	30940	30978	+	38	EHI_027640		amoebadb	no
DS571215	63385	63401	+	16	EHI_027800		amoebadb	no
DS571216	40848	40852	+	4	EHI_164890		amoebadb	no
DS571218	46920	46937	-	17	EHI_150470		amoebadb	no
DS571218	52656	52680	+	24	EHI_150490		amoebadb	no
DS571219	26301	26318	-	17	EHI_169100		amoebadb	no
DS571219	41659	41681	-	22	EHI_169280		amoebadb	no
DS571219	43846	43870	-	24	EHI_169290		amoebadb	no
DS571219	59902	59949	+	47	EHI_169360		amoebadb	yes
DS571220	44206	44224	+	18	EHI_174220		amoebadb	no
DS571222	5062	5080	-	18	EHI_136150		amoebadb	no
DS571222	16758	16823	-	65	EHI_136210		amoebadb	no
DS571222	34018	34052	+	34	EHI_136380		amoebadb	no
DS571222	44634	44652	+	18	EHI_136440		amoebadb	no
DS571223	14899	14919	-	20	EHI_158050		amoebadb	no
DS571223	21612	21639	+	27	EHI_158100		amoebadb	no
DS571223	30182	30197	+	15	EHI_158160		amoebadb	no
DS571223	44269	44305	+	36	EHI_158240		amoebadb	yes
DS571224	17384	17396	+	12	EHI_040280		amoebadb	no
DS571224	20379	20417	+	38	EHI_040310		amoebadb	no
DS571224	53694	53748	-	54	EHI_040450		amoebadb	no
DS571225	27138	27179	+	41	EHI_054740		amoebadb	no
DS571226	27857	27857	+	0	EHI_079890		amoebadb	no
DS571226	37030	37371	+	341	EHI_079950		amoebadb	yes
DS571226	45424	45499	+	75	EHI_079980		amoebadb	no
DS571227	35352	35389	+	37	EHI_006050		amoebadb	no
DS571227	36594	36628	+	34	EHI_006060		amoebadb	no
DS571227	37402	37434	+	32	EHI_006070		amoebadb	no
DS571227	54007	54052	-	45	EHI_006170		amoebadb	no
DS571228	29456	29483	-	27	EHI_160940		amoebadb	yes
DS571228	37786	37830	-	44	EHI_160980		amoebadb	no
DS571228	39705	39737	-	32	EHI_160990		amoebadb	no
DS571228	44837	44866	-	29	EHI_161030		amoebadb	no
DS571228	50430	50490	-	60	EHI_161070		amoebadb	no
DS571229	22828	22851	-	23	EHI_076870		amoebadb	no
DS571229	29764	29764	+	0	EHI_077000		amoebadb	no
DS571230	6353	6394	-	41	EHI_188720		amoebadb	no
DS571230	12032	12048	+	16	EHI_188760		amoebadb	no
DS571230	25771	25785	-	14	EHI_188850		amoebadb	no
DS571230	44350	44373	+	23	EHI_188960		amoebadb	no
DS571231	7460	7479	+	19	EHI_048560		amoebadb	yes
DS571231	35326	35338	+	12	EHI_048630		amoebadb	no
DS571231	41011	41406	-	395	EHI_048680		amoebadb	yes
DS571231	52103	52132	-	29	EHI_048730		amoebadb	no
DS571231	53127	53150	-	23	EHI_048740		amoebadb	no
DS571232	30874	30934	-	60	EHI_074080		amoebadb	no
DS571232	32828	32861	+	33	EHI_074090		amoebadb	no
DS571232	54822	54850	+	28	EHI_074180		amoebadb	no
DS571233	26493	26508	+	15	EHI_025360		amoebadb	no
DS571233	29215	29253	+	38	EHI_025370		amoebadb	no
DS571233	39363	39395	+	32	EHI_025440		amoebadb	no
DS571234	11040	11040	+	0	EHI_059670		amoebadb	yes
DS571234	12045	12064	-	19	EHI_059680		amoebadb	no
DS571234	28456	28498	+	42	EHI_059840		amoebadb	no
DS571234	33269	33301	-	32	EHI_059860		amoebadb	no
DS571234	35323	35364	-	41	EHI_059870		amoebadb	no
DS571234	48226	48329	-	103	EHI_059910		amoebadb	yes
DS571236	41083	41159	-	76	EHI_106310		amoebadb	no
DS571236	49589	49605	-	16	EHI_106350		amoebadb	no
DS571237	42526	42545	+	19	EHI_175460		amoebadb	no
DS571238	45607	45627	-	20	EHI_053190		amoebadb	no
DS571239	13303	13345	+	42	EHI_095850		amoebadb	no
DS571240	38310	38348	+	38	EHI_017700		amoebadb	yes
DS571240	42154	42187	+	33	EHI_017740		amoebadb	no
DS571240	42800	42836	-	36	EHI_017750		amoebadb	no
DS571241	16837	16873	-	36	EHI_138350		amoebadb	no
DS571241	24627	24643	+	16	EHI_138380		amoebadb	no
DS571241	34976	35679	+	703	EHI_138440		amoebadb	no
DS571241	37870	37896	-	26	EHI_138470		amoebadb	no
DS571242	6912	6927	+	15	EHI_109680		amoebadb	no
DS571242	17603	17911	-	308	EHI_109850		amoebadb	no
DS571242	29825	29897	+	72	EHI_109920		amoebadb	yes
DS571242	43416	43435	-	19	EHI_109990		amoebadb	no
DS571242	45223	45243	+	20	EHI_110000		amoebadb	no
DS571243	7139	7152	+	13	EHI_140500		amoebadb	no
DS571243	11387	11534	+	147	EHI_140540		amoebadb	yes
DS571243	11598	11626	-	28	EHI_140550		amoebadb	no
DS571243	27160	27195	+	35	EHI_140640		amoebadb	yes
DS571243	30968	30975	+	7	EHI_140650		amoebadb	no
DS571243	36489	36508	+	19	EHI_140680		amoebadb	no
DS571244	1627	1659	+	32	EHI_145840		amoebadb	no
DS571244	24367	24400	+	33	EHI_146110		amoebadb	no
DS571244	38744	38761	+	17	EHI_146150		amoebadb	no
DS571244	41779	41808	-	29	EHI_146180		amoebadb	no
DS571244	45805	45820	+	15	EHI_146200		amoebadb	no
DS571245	1657	2168	+	511	EHI_052610		amoebadb	yes
DS571245	35005	35026	-	21	EHI_052860		amoebadb	no
DS571246	2283	2301	-	18	EHI_163480		amoebadb	no
DS571246	10317	10345	-	28	EHI_163540		amoebadb	yes
DS571246	30715	30742	-	27	EHI_163670		amoebadb	yes
DS571246	31434	31842	-	408	EHI_163690		amoebadb	yes
DS571248	10001	10021	-	20	EHI_200670		amoebadb	no
DS571248	50539	50554	+	15	EHI_200850		amoebadb	no
DS571249	35464	35489	-	25	EHI_185280		amoebadb	no
DS571250	48323	48349	+	26	EHI_195140		amoebadb	no
DS571251	17373	17396	+	23	EHI_114140		amoebadb	no
DS571252	36296	36321	+	25	EHI_033710		amoebadb	no
DS571252	41677	41704	-	27	EHI_033740		amoebadb	no
DS571254	661	694	-	33	EHI_140120		amoebadb	yes
DS571254	42656	42689	+	33	EHI_140350		amoebadb	yes
DS571254	46677	46705	+	28	EHI_140370		amoebadb	no
DS571254	49481	49482	+	1	EHI_140380		amoebadb	no
DS571256	10824	10878	+	54	EHI_048140		amoebadb	no
DS571256	34549	34565	+	16	EHI_048240		amoebadb	no
DS571256	36016	36042	+	26	EHI_048260		amoebadb	no
DS571257	6612	6646	-	34	EHI_156220		amoebadb	no
DS571257	11648	11651	+	3	EHI_156240		amoebadb	no
DS571257	21522	21550	-	28	EHI_156330		amoebadb	no
DS571259	3184	3200	+	16	EHI_041910		amoebadb	no
DS571259	13423	13449	-	26	EHI_041980		amoebadb	no
DS571259	16469	16484	-	15	EHI_042090		amoebadb	no
DS571259	43606	43619	+	13	EHI_042230		amoebadb	no
DS571259	44352	44371	-	19	EHI_042250		amoebadb	no
DS571261	8315	8347	+	32	EHI_031250		amoebadb	no
DS571261	43196	43215	-	19	EHI_031390		amoebadb	no
DS571261	43833	43853	-	20	EHI_031400		amoebadb	no
DS571262	16980	17009	-	29	EHI_189460		amoebadb	no
DS571262	25444	25463	+	19	EHI_189490		amoebadb	no
DS571263	15315	15329	+	14	EHI_168240		amoebadb	no
DS571263	20879	20888	-	9	EHI_168280		amoebadb	no
DS571263	27496	27525	+	29	EHI_168340		amoebadb	no
DS571264	6882	6957	-	75	EHI_095050		amoebadb	no
DS571264	41500	41516	+	16	EHI_095180		amoebadb	no
DS571265	9351	9406	-	55	EHI_193300		amoebadb	no
DS571265	18555	18571	-	16	EHI_193360		amoebadb	no
DS571266	1267	1300	+	33	EHI_028880		amoebadb	no
DS571266	30768	30806	+	38	EHI_029020		amoebadb	yes
DS571267	36533	36636	+	103	EHI_119310		amoebadb	no
DS571268	6280	6290	-	10	EHI_035080		amoebadb	no
DS571271	39821	39845	-	24	EHI_078300		amoebadb	no
DS571273	6003	6013	-	10	EHI_111550		amoebadb	no
DS571273	12581	12606	-	25	EHI_111570		amoebadb	no
DS571273	19634	19665	+	31	EHI_111720		amoebadb	no
DS571273	21924	21951	-	27	EHI_111750		amoebadb	no
DS571273	25496	25515	+	19	EHI_111760		amoebadb	no
DS571273	27427	27446	+	19	EHI_111770		amoebadb	no
DS571274	22262	22278	-	16	EHI_154200		amoebadb	no
DS571274	26402	26420	-	18	EHI_154220		amoebadb	no
DS571275	2906	2930	-	24	EHI_081130		amoebadb	no
DS571275	19385	19445	-	60	EHI_081320		amoebadb	yes
DS571275	20903	20920	+	17	EHI_081330		amoebadb	no
DS571275	31418	31445	-	27	EHI_081410		amoebadb	no
DS571275	44890	44908	-	18	EHI_081430		amoebadb	no
DS571276	17647	17669	+	22	EHI_121800		amoebadb	no
DS571277	14222	14246	+	24	EHI_131900		amoebadb	no
DS571277	22800	22826	+	26	EHI_131940		amoebadb	no
DS571279	9565	9599	+	34	EHI_111000		amoebadb	no
DS571279	21010	21045	+	35	EHI_111060		amoebadb	no
DS571280	14184	14235	+	51	EHI_001780		amoebadb	no
DS571281	2827	2845	-	18	EHI_122710		amoebadb	no
DS571282	25643	25673	+	30	EHI_040660		amoebadb	no
DS571283	1719	1739	+	20	EHI_129740		amoebadb	no
DS571283	1797	1817	-	20	EHI_129750		amoebadb	no
DS571283	27402	27434	+	32	EHI_129870		amoebadb	no
DS571284	14639	14675	+	36	EHI_070680		amoebadb	no
DS571284	25250	25263	+	13	EHI_070730		amoebadb	no
DS571284	27093	27129	+	36	EHI_070750		amoebadb	no
DS571286	30374	30390	+	16	EHI_026410		amoebadb	no
DS571287	24494	24520	-	26	EHI_137060		amoebadb	no
DS571288	12298	12314	+	16	EHI_181140		amoebadb	no
DS571288	20495	20564	+	69	EHI_181170		amoebadb	no
DS571288	23011	23207	+	196	EHI_181180		amoebadb	yes
DS571288	35165	35229	-	64	EHI_181250		amoebadb	yes
DS571288	41444	41459	-	15	EHI_181290		amoebadb	no
DS571289	14819	14841	+	22	EHI_072040		amoebadb	no
DS571290	582	705	+	123	EHI_125130		amoebadb	no
DS571291	31844	31860	-	16	EHI_179980		amoebadb	no
DS571291	32576	32734	-	158	EHI_180000		amoebadb	no
DS571292	16643	16661	+	18	EHI_042920		amoebadb	no
DS571293	11648	11686	+	38	EHI_117610		amoebadb	no
DS571294	5127	5186	+	59	EHI_081630		amoebadb	no
DS571294	19091	19109	-	18	EHI_081740		amoebadb	no
DS571294	21417	21443	-	26	EHI_081760		amoebadb	no
DS571294	36267	36287	+	20	EHI_081790		amoebadb	no
DS571295	24266	24285	+	19	EHI_082550		amoebadb	no
DS571296	28987	30207	+	1220	EHI_099320		amoebadb	no
DS571296	32305	32314	+	9	EHI_099340		amoebadb	no
DS571296	32469	32494	-	25	EHI_099350		amoebadb	no
DS571297	29323	29370	+	47	EHI_142930		amoebadb	no
DS571299	15612	15756	+	144	EHI_099730		amoebadb	yes
DS571299	23802	23819	+	17	EHI_099780		amoebadb	no
DS571299	25693	25712	+	19	EHI_099790		amoebadb	no
DS571299	32785	32812	-	27	EHI_099840		amoebadb	no
DS571300	7208	7229	-	21	EHI_172960		amoebadb	no
DS571300	34053	34078	+	25	EHI_173480		amoebadb	no
DS571301	24679	24698	-	19	EHI_060400		amoebadb	no
DS571301	35789	35840	+	51	EHI_060440		amoebadb	no
DS571302	20200	20213	+	13	EHI_065270		amoebadb	no
DS571304	11555	11598	+	43	EHI_161860		amoebadb	no
DS571304	22612	22614	+	2	EHI_161930		amoebadb	no
DS571304	30952	30975	-	23	EHI_161980		amoebadb	no
DS571306	19423	19455	-	32	EHI_201250		amoebadb	no
DS571307	32444	32461	-	17	EHI_088220		amoebadb	no
DS571308	3928	3943	+	15	EHI_184470		amoebadb	no
DS571309	29935	29985	-	50	EHI_054260		amoebadb	no
DS571311	6484	6517	-	33	EHI_139310		amoebadb	no
DS571312	20274	20309	+	35	EHI_033250		amoebadb	no
DS571313	6864	6913	+	49	EHI_056380		amoebadb	no
DS571313	26349	26375	+	26	EHI_056480		amoebadb	no
DS571313	27321	27356	+	35	EHI_056490		amoebadb	no
DS571314	11771	11791	+	20	EHI_057670		amoebadb	no
DS571314	18784	18837	-	53	EHI_057700		amoebadb	yes
DS571315	20830	20939	+	109	EHI_189930		amoebadb	yes
DS571315	21027	21029	-	2	EHI_189940		amoebadb	no
DS571316	5076	5094	-	18	EHI_183420		amoebadb	no
DS571316	6702	6725	+	23	EHI_183430		amoebadb	no
DS571316	12510	12545	-	35	EHI_183480		amoebadb	no
DS571316	29477	29534	-	57	EHI_183550		amoebadb	no
DS571316	32234	32251	+	17	EHI_183570		amoebadb	no
DS571317	21355	21374	+	19	EHI_192090		amoebadb	no
DS571317	22037	22069	+	32	EHI_192100		amoebadb	yes
DS571317	22121	22142	-	21	EHI_192110		amoebadb	no
DS571318	7938	8014	-	76	EHI_083250		amoebadb	yes
DS571318	25981	26019	+	38	EHI_083430		amoebadb	no
DS571318	31908	31956	+	48	EHI_083460		amoebadb	no
DS571319	2774	2809	+	35	EHI_199580		amoebadb	no
DS571319	19213	19229	+	16	EHI_199660		amoebadb	no
DS571321	9009	9076	-	67	EHI_046620		amoebadb	no
DS571321	27134	27135	-	1	EHI_046690		amoebadb	yes
DS571322	8388	8411	+	23	EHI_055670		amoebadb	no
DS571323	2754	2773	+	19	EHI_007150		amoebadb	no
DS571323	28417	28434	+	17	EHI_007350		amoebadb	no
DS571324	14808	14814	+	6	EHI_011210		amoebadb	yes
DS571326	8551	8780	-	229	EHI_166390		amoebadb	yes
DS571329	4277	4298	+	21	EHI_111980		amoebadb	no
DS571329	8242	8272	+	30	EHI_111990		amoebadb	no
DS571329	17189	17273	-	84	EHI_112040		amoebadb	no
DS571330	10713	10989	+	276	EHI_023600		amoebadb	yes
DS571332	2157	2195	-	38	EHI_199940		amoebadb	no
DS571332	6853	6873	-	20	EHI_199970		amoebadb	no
DS571332	9052	9093	+	41	EHI_199990		amoebadb	no
DS571334	11143	11159	-	16	EHI_037130		amoebadb	no
DS571335	16864	16883	-	19	EHI_091070		amoebadb	no
DS571335	19703	19712	-	9	EHI_091090		amoebadb	no
DS571336	9288	9313	-	25	EHI_120880		amoebadb	no
DS571336	15065	15086	+	21	EHI_120900		amoebadb	no
DS571337	7365	7392	+	27	EHI_079190		amoebadb	no
DS571338	3039	3104	-	65	EHI_114640		amoebadb	yes
DS571338	13331	13345	-	14	EHI_114810		amoebadb	no
DS571339	18904	18924	+	20	EHI_020280		amoebadb	no
DS571339	21820	21842	+	22	EHI_020300		amoebadb	no
DS571339	22246	22261	-	15	EHI_020310		amoebadb	no
DS571339	25102	25126	-	24	EHI_020330		amoebadb	no
DS571339	27696	27710	+	14	EHI_020350		amoebadb	no
DS571339	28952	28977	+	25	EHI_020360		amoebadb	no
DS571339	29639	29658	+	19	EHI_020370		amoebadb	no
DS571340	7104	7125	-	21	EHI_029530		amoebadb	no
DS571340	22001	22030	+	29	EHI_029600		amoebadb	no
DS571341	19831	19845	-	14	EHI_047770		amoebadb	no
DS571343	795	812	+	17	EHI_167620		amoebadb	no
DS571343	27913	27913	-	0	EHI_167730		amoebadb	yes
DS571347	15150	15162	-	12	EHI_052140		amoebadb	no
DS571347	16029	16097	-	68	EHI_052150		amoebadb	no
DS571349	11439	11462	+	23	EHI_098780		amoebadb	no
DS571352	14546	14566	-	20	EHI_058080		amoebadb	no
DS571352	16091	16134	+	43	EHI_058090		amoebadb	no
DS571355	4225	4408	-	183	EHI_039180		amoebadb	yes
DS571356	16165	16181	-	16	EHI_185580		amoebadb	no
DS571357	22521	22804	+	283	EHI_115360		amoebadb	no
DS571358	9657	9685	-	28	EHI_036530		amoebadb	no
DS571361	12544	12558	+	14	EHI_120300		amoebadb	no
DS571361	21555	21576	+	21	EHI_120360		amoebadb	no
DS571362	4166	4167	-	1	EHI_162190		amoebadb	no
DS571362	5894	5932	-	38	EHI_162200		amoebadb	no
DS571365	14526	14678	+	152	EHI_197840		amoebadb	yes
DS571367	7115	7134	-	19	EHI_090400		amoebadb	no
DS571367	13092	13240	+	148	EHI_090410		amoebadb	yes
DS571368	17478	17770	+	292	EHI_114390		amoebadb	yes
DS571369	9878	9905	+	27	EHI_077500		amoebadb	no
DS571369	14145	14212	-	67	EHI_077530		amoebadb	yes
DS571371	15179	15256	+	77	EHI_132390		amoebadb	yes
DS571377	4623	4644	-	21	EHI_169580		amoebadb	no
DS571378	2833	2905	-	72	EHI_113890		amoebadb	no
DS571378	23933	23966	-	33	EHI_114010		amoebadb	no
DS571379	7837	7865	-	28	EHI_120600		amoebadb	no
DS571379	25092	25092	+	0	EHI_120650		amoebadb	no
DS571380	18519	18565	-	46	EHI_080260		amoebadb	no
DS571380	19402	19426	-	24	EHI_080270		amoebadb	no
DS571381	4428	4435	+	7	EHI_086380		amoebadb	no
DS571381	8280	8360	-	80	EHI_086510		amoebadb	yes
DS571381	19945	20038	-	93	EHI_086690		amoebadb	yes
DS571382	3466	3477	-	11	EHI_038160		amoebadb	no
DS571382	21492	22034	+	542	EHI_038330		amoebadb	no
DS571384	13208	13244	-	36	EHI_192810		amoebadb	no
DS571387	4135	4210	-	75	EHI_025830		amoebadb	yes
DS571387	10530	10565	-	35	EHI_025850		amoebadb	no
DS571388	6536	6573	+	37	EHI_083600		amoebadb	no
DS571389	7896	7905	-	9	EHI_139960		amoebadb	no
DS571390	4827	5343	+	516	EHI_135710		amoebadb	no
DS571392	9986	10025	-	39	EHI_124850		amoebadb	no
DS571393	5124	5145	-	21	EHI_119910		amoebadb	no
DS571394	1977	1994	-	17	EHI_075640		amoebadb	no
DS571394	15430	15451	-	21	EHI_075690		amoebadb	no
DS571394	16254	16266	-	12	EHI_075700		amoebadb	no
DS571396	10795	10855	-	60	EHI_193080		amoebadb	yes
DS571397	8850	8901	-	51	EHI_003900		amoebadb	no
DS571397	18681	18703	+	22	EHI_003940		amoebadb	no
DS571398	10972	10992	-	20	EHI_146340		amoebadb	no
DS571398	17011	17051	+	40	EHI_146370		amoebadb	no
DS571398	20258	20267	+	9	EHI_146380		amoebadb	no
DS571398	20982	21010	+	28	EHI_146390		amoebadb	no
DS571401	5270	5523	+	253	EHI_074710		amoebadb	no
DS571402	8230	8256	+	26	EHI_067520		amoebadb	no
DS571402	8423	8468	-	45	EHI_067530		amoebadb	yes
DS571404	13596	13617	+	21	EHI_187740		amoebadb	no
DS571408	13568	14069	-	501	EHI_189170		amoebadb	yes
DS571411	12936	12967	-	31	EHI_112880		amoebadb	no
DS571414	10581	10606	-	25	EHI_080730		amoebadb	no
DS571416	5256	5274	-	18	EHI_055360		amoebadb	no
DS571418	6851	6876	+	25	EHI_196370		amoebadb	no
DS571420	5220	5221	+	1	EHI_059255		amoebadb	no
DS571422	5347	5432	+	85	EHI_135430		amoebadb	yes
DS571422	7539	7556	+	17	EHI_135450		amoebadb	no
DS571422	9342	9366	-	24	EHI_135470		amoebadb	no
DS571425	18096	18161	-	65	EHI_108500		amoebadb	yes
DS571426	11672	11678	+	6	EHI_190860		amoebadb	no
DS571437	2886	2900	-	14	EHI_144710		amoebadb	no
DS571438	5586	5633	+	47	EHI_146510		amoebadb	no
DS571438	9881	9934	+	53	EHI_146530		amoebadb	yes
DS571438	12332	12360	-	28	EHI_146560		amoebadb	no
DS571438	13690	13712	+	22	EHI_146570		amoebadb	no
DS571439	12848	12922	+	74	EHI_088460		amoebadb	no
DS571439	15261	15348	-	87	EHI_088490		amoebadb	no
DS571440	16814	16828	+	14	EHI_039610		amoebadb	no
DS571441	10196	10216	+	20	EHI_089990		amoebadb	no
DS571441	13095	13113	+	18	EHI_090030		amoebadb	no
DS571443	5411	5470	-	59	EHI_180800		amoebadb	yes
DS571445	14494	14528	+	34	EHI_067090		amoebadb	no
DS571448	16689	16721	+	32	EHI_061980		amoebadb	no
DS571455	3934	4383	-	449	EHI_173600		amoebadb	no
DS571470	3589	3610	+	21	EHI_058920		amoebadb	no
DS571471	11524	11557	-	33	EHI_172170		amoebadb	no
DS571473	6789	6825	-	36	EHI_167300		amoebadb	no
DS571473	8377	8415	+	38	EHI_167310		amoebadb	no
DS571473	11090	11113	+	23	EHI_167320		amoebadb	no
DS571481	9160	9200	-	40	EHI_191750		amoebadb	no
DS571482	1523	1541	-	18	EHI_196530		amoebadb	no
DS571482	9433	9447	-	14	EHI_196580		amoebadb	no
DS571484	1845	1915	-	70	EHI_143070		amoebadb	no
DS571484	8669	9586	+	917	EHI_143090		amoebadb	no
DS571484	13062	13090	-	28	EHI_143110		amoebadb	no
DS571486	7972	7981	-	9	EHI_017030		amoebadb	no
DS571486	12855	13175	+	320	EHI_017050		amoebadb	yes
DS571487	10406	10432	+	26	EHI_046390		amoebadb	no
DS571489	7327	7345	-	18	EHI_199820		amoebadb	no
DS571493	4507	4564	-	57	EHI_020080		amoebadb	no
DS571506	7508	7542	-	34	EHI_001420		amoebadb	no
DS571511	1271	1334	+	63	EHI_126530		amoebadb	no
DS571513	2034	2572	+	538	EHI_154580		amoebadb	no
DS571515	10365	10398	+	33	EHI_022130		amoebadb	no
DS571518	3983	4563	+	580	EHI_127670		amoebadb	no
DS571522	10000	10068	+	68	EHI_085840		amoebadb	no
DS571523	1	1	-	0	EHI_012700		amoebadb	no
DS571523	7441	7460	-	19	EHI_012720		amoebadb	no
DS571527	10719	10774	+	55	EHI_031960		amoebadb	no
DS571528	1893	1912	+	19	EHI_029210		amoebadb	no
DS571528	6040	6065	-	25	EHI_029350		amoebadb	no
DS571528	7666	7687	-	21	EHI_029370		amoebadb	no
DS571531	1	2	-	1	EHI_057420		amoebadb	no
DS571540	2990	3005	-	15	EHI_176820		amoebadb	no
DS571541	11637	11638	+	1	EHI_016010		amoebadb	no
DS571542	8999	9016	-	17	EHI_200980		amoebadb	no
DS571545	2852	2911	+	59	EHI_156660		amoebadb	yes
DS571545	5794	5832	-	38	EHI_156690		amoebadb	no
DS571546	5931	5964	+	33	EHI_025100		amoebadb	no
DS571548	11486	11487	+	1	EHI_107560		amoebadb	no
DS571558	7044	7090	+	46	EHI_071590		amoebadb	no
DS571559	4166	4200	+	34	EHI_133100		amoebadb	no
DS571561	5664	5681	+	17	EHI_042720		amoebadb	no
DS571574	8646	8663	+	17	EHI_102170		amoebadb	no
DS571578	808	833	+	25	EHI_040800		amoebadb	no
DS571579	5277	5286	-	9	EHI_198010		amoebadb	no
DS571611	2922	2945	-	23	EHI_042370		amoebadb	no
DS571615	6105	6542	+	437	EHI_014810		amoebadb	no
DS571616	1	1	-	0	EHI_041580		amoebadb	no
DS571633	1	2	-	1	EHI_160010		amoebadb	no
DS571643	2228	2251	+	23	EHI_060740		amoebadb	no
DS571650	353	376	+	23	EHI_092930		amoebadb	no
DS571653	1633	1653	+	20	EHI_165770		amoebadb	no
DS571658	5797	6575	+	778	EHI_189750		amoebadb	no
DS571660	6921	6922	+	1	EHI_182260		amoebadb	no
DS571661	1065	1098	-	33	EHI_131360		amoebadb	no
DS571667	5786	5809	-	23	EHI_027030		amoebadb	no
DS571685	1358	1388	-	30	EHI_116720		amoebadb	no
DS571691	5954	5955	+	1	EHI_154450		amoebadb	no
DS571697	2318	2336	-	18	EHI_123390		amoebadb	no
DS571708	4489	4541	-	52	EHI_122100		amoebadb	no
DS571711	1760	1785	+	25	EHI_163240		amoebadb	no
DS571711	3921	3981	+	60	EHI_163260		amoebadb	yes
DS571718	3283	3301	-	18	EHI_005460		amoebadb	no
DS571740	1	1	-	0	EHI_161170		amoebadb	no
DS571740	2175	2198	+	23	EHI_161180		amoebadb	no
DS571740	4793	4793	+	0	EHI_161200		amoebadb	no
DS571744	1	1	-	0	EHI_178230		amoebadb	no
DS571748	423	486	-	63	EHI_116460		amoebadb	no
DS571748	2059	2072	-	13	EHI_116470		amoebadb	no
DS571765	1	2	-	1	EHI_116830		amoebadb	no
DS571775	1349	1365	+	16	EHI_115150		amoebadb	no
DS571819	2467	2485	+	18	EHI_122310		amoebadb	no
DS571900	1431	1450	+	19	EHI_029930		amoebadb	no
DS571910	2854	2855	+	1	EHI_176380		amoebadb	no
DS571921	1029	1046	+	17	EHI_101730		amoebadb	no
DS571976	1108	1129	-	21	EHI_116360		amoebadb	no
DS571979	1	2	-	1	EHI_157260		amoebadb	no
DS572045	2075	2075	+	0	EHI_156910		amoebadb	no
DS572048	1	2	-	1	EHI_041680		amoebadb	no
DS572059	1	2	-	1	EHI_013550		amoebadb	no
DS572062	2010	2011	+	1	EHI_128600		amoebadb	no
DS572089	1882	1883	+	1	EHI_113790		amoebadb	no
DS572093	1	1	-	0	EHI_021780		amoebadb	no
DS572139	1736	1737	+	1	EHI_181710		amoebadb	no
DS572143	1	181	-	180	EHI_072240		amoebadb	no
DS572162	1691	1692	+	1	EHI_045930		amoebadb	no
DS572186	1631	1631	+	0	EHI_082900		amoebadb	no
DS572188	1	1	-	0	EHI_028770		amoebadb	no
DS572197	339	635	+	296	EHI_126660		amoebadb	no
DS572207	1578	1579	+	1	EHI_158840		amoebadb	no
DS572223	1	1	-	0	EHI_079610		amoebadb	no
DS572282	1	2	-	1	EHI_041170		amoebadb	no
DS572390	1	2	-	1	EHI_155890		amoebadb	no
DS572443	1	1	-	0	EHI_186120		amoebadb	no
DS572467	1142	1142	+	0	EHI_021680		amoebadb	no
DS572483	1126	1126	+	0	EHI_025600		amoebadb	no
DS572518	1	1	-	0	EHI_109120		amoebadb	no
DS572546	1071	1072	+	1	EHI_042580		amoebadb	no
DS572566	1058	1059	+	1	EHI_018740		amoebadb	no
DS572618	1	1	-	0	EHI_125040		amoebadb	no
DS572644	1012	1013	+	1	EHI_001635		amoebadb	no
DS572649	1011	1012	+	1	EHI_017060		amoebadb	no
DS571145	5945	5965	+	20	EHI_151180	protein_coding	this study	no
DS571145	8969	8973	+	4	EHI_151200	protein_coding	this study	no
DS571145	9045	9059	-	14	EHI_151210	protein_coding	this study	no
DS571145	14726	14740	-	14	EHI_151240	protein_coding	this study	no
DS571145	25525	25558	+	33	EHI_151260	protein_coding	this study	no
DS571145	31165	31171	+	6	EHI_151280	protein_coding	this study	no
DS571145	32562	32590	+	28	EHI_151290	protein_coding	this study	no
DS571145	32984	33004	-	20	EHI_151300	protein_coding	this study	no
DS571145	44465	44473	+	8	EHI_151350	protein_coding	this study	no
DS571145	45290	45338	+	48	EHI_151360	protein_coding	this study	no
DS571145	45409	45410	-	1	EHI_151370	protein_coding	this study	no
DS571145	48709	48710	-	1	EHI_151380	protein_coding	this study	no
DS571145	59828	59844	-	16	EHI_151420	protein_coding	this study	no
DS571145	64115	64121	-	6	EHI_151440	protein_coding	this study	no
DS571145	68025	70069	-	2044	EHI_151470	protein_coding	this study	no
DS571145	69976	69988	+	12	EHI_151460	protein_coding	this study	no
DS571145	73128	73221	+	93	EHI_151480	protein_coding	this study	no
DS571145	87196	87200	+	4	EHI_151550	protein_coding	this study	no
DS571145	91165	91190	-	25	EHI_151580	protein_coding	this study	no
DS571145	93669	93691	-	22	EHI_151600	protein_coding	this study	no
DS571145	107899	107911	+	12	EHI_151630	protein_coding	this study	no
DS571145	111361	111377	+	16	EHI_151640	protein_coding	this study	no
DS571145	127014	127020	-	6	EHI_151710	protein_coding	this study	no
DS571145	128883	128891	-	8	EHI_151720	protein_coding	this study	no
DS571145	134993	135044	-	51	EHI_151750	protein_coding	this study	no
DS571145	150118	150129	-	11	EHI_151800	protein_coding	this study	no
DS571145	181052	181076	+	24	EHI_151950	protein_coding	this study	no
DS571145	181165	181188	-	23	EHI_151960	protein_coding	this study	no
DS571145	190957	190967	+	10	EHI_152010	protein_coding	this study	no
DS571145	195249	195253	-	4	EHI_152040	protein_coding	this study	no
DS571145	197307	197324	-	17	EHI_152050	protein_coding	this study	no
DS571145	214510	214529	+	19	EHI_152120	protein_coding	this study	no
DS571145	227866	227886	+	20	EHI_152200	protein_coding	this study	no
DS571145	231177	231193	+	16	EHI_152220	protein_coding	this study	no
DS571145	231240	231264	-	24	EHI_152230	protein_coding	this study	no
DS571145	234153	234181	-	28	EHI_152270	protein_coding	this study	no
DS571145	239608	239656	+	48	EHI_152280	protein_coding	this study	no
DS571145	240894	240942	-	48	EHI_152300	protein_coding	this study	no
DS571145	245038	245046	+	8	EHI_152320	protein_coding	this study	no
DS571145	246412	246437	+	25	EHI_152330	protein_coding	this study	no
DS571145	249929	249935	-	6	EHI_152360	protein_coding	this study	no
DS571145	250647	250667	-	20	EHI_152370	protein_coding	this study	no
DS571145	252566	252590	+	24	EHI_152380	protein_coding	this study	no
DS571145	272534	272549	-	15	EHI_152460	protein_coding	this study	no
DS571145	276790	276794	-	4	EHI_152490	protein_coding	this study	no
DS571145	280810	280882	+	72	EHI_152520	protein_coding	this study	no
DS571145	283957	283977	+	20	EHI_152540	protein_coding	this study	no
DS571145	292300	292312	+	12	EHI_152600	protein_coding	this study	no
DS571145	301332	301335	-	3	EHI_152650	protein_coding	this study	no
DS571145	303385	303400	-	15	EHI_152660	protein_coding	this study	no
DS571145	304203	304231	-	28	EHI_152670	protein_coding	this study	yes
DS571145	304230	304231	-	1	EHI_152670	protein_coding	this study	yes
DS571145	307748	307799	+	51	EHI_152680	protein_coding	this study	no
DS571145	313982	314107	+	125	EHI_152710	protein_coding	this study	no
DS571145	320604	320664	+	60	EHI_152750	protein_coding	this study	no
DS571145	321931	321958	+	27	EHI_152760	protein_coding	this study	no
DS571145	327836	327856	-	20	EHI_152800	protein_coding	this study	no
DS571145	339412	339445	-	33	EHI_152880	protein_coding	this study	no
DS571145	345912	345972	-	60	EHI_152920	protein_coding	this study	no
DS571145	359739	359762	+	23	EHI_152960	protein_coding	this study	no
DS571145	359832	359847	-	15	EHI_152970	protein_coding	this study	yes
DS571145	361142	361155	-	13	EHI_152980	protein_coding	this study	no
DS571145	361629	361647	-	18	EHI_152990	protein_coding	this study	no
DS571145	383514	383537	+	23	EHI_153080	protein_coding	this study	yes
DS571145	383514	383570	+	56	EHI_153080	protein_coding	this study	yes
DS571145	384355	384358	+	3	EHI_153090	protein_coding	this study	yes
DS571145	386704	386717	+	13	EHI_153100	protein_coding	this study	no
DS571145	387144	387217	-	73	EHI_153110	protein_coding	this study	no
DS571145	397230	397244	-	14	EHI_153150	protein_coding	this study	no
DS571145	400995	401028	+	33	EHI_153160	protein_coding	this study	no
DS571145	406488	406497	+	9	EHI_153200	protein_coding	this study	no
DS571145	408263	408304	+	41	EHI_153210	protein_coding	this study	no
DS571145	411224	411243	-	19	EHI_153240	protein_coding	this study	no
DS571145	422216	422234	+	18	EHI_153290	protein_coding	this study	no
DS571145	436742	436743	+	1	EHI_153380	protein_coding	this study	no
DS571145	439044	439064	+	20	EHI_153390	protein_coding	this study	no
DS571145	448980	448992	-	12	EHI_153450	protein_coding	this study	no
DS571145	452887	452898	+	11	EHI_153480	protein_coding	this study	no
DS571145	457224	457242	-	18	EHI_153510	protein_coding	this study	no
DS571145	461888	461896	+	8	EHI_153530	protein_coding	this study	no
DS571145	461958	461987	-	29	EHI_153540	protein_coding	this study	no
DS571145	483825	483843	+	18	EHI_153660	protein_coding	this study	no
DS571145	489861	489896	-	35	EHI_153710	protein_coding	this study	no
DS571145	494831	494844	-	13	EHI_153730	protein_coding	this study	no
DS571145	498766	498802	-	36	EHI_153770	protein_coding	this study	yes
DS571145	498788	498802	-	14	EHI_153770	protein_coding	this study	yes
DS571145	502231	502267	-	36	EHI_153780	protein_coding	this study	no
DS571145	518147	518150	+	3	EHI_153800	protein_coding	this study	no
DS571146	8438	8457	+	19	EHI_148040	protein_coding	this study	no
DS571146	9934	9959	+	25	EHI_148050	protein_coding	this study	no
DS571146	23139	23141	+	2	EHI_148130	protein_coding	this study	no
DS571146	24649	24669	-	20	EHI_148150	protein_coding	this study	no
DS571146	25834	25890	-	56	EHI_148160	protein_coding	this study	no
DS571146	28163	28183	-	20	EHI_148170	protein_coding	this study	no
DS571146	32259	32271	-	12	EHI_148200	protein_coding	this study	no
DS571146	34265	34286	-	21	EHI_148210	protein_coding	this study	no
DS571146	35794	35835	-	41	EHI_148220	protein_coding	this study	no
DS571146	46993	47000	-	7	EHI_148270	protein_coding	this study	no
DS571146	53238	53248	+	10	EHI_148290	protein_coding	this study	no
DS571146	60338	60402	+	64	EHI_148330	protein_coding	this study	no
DS571146	65021	65040	-	19	EHI_148380	protein_coding	this study	no
DS571146	86645	86660	+	15	EHI_148480	protein_coding	this study	no
DS571146	87135	87155	-	20	EHI_148490	protein_coding	this study	no
DS571146	98142	98158	+	16	EHI_148540	protein_coding	this study	no
DS571146	110671	110688	+	17	EHI_148580	protein_coding	this study	no
DS571146	110846	110863	-	17	EHI_148590	protein_coding	this study	no
DS571146	113889	113905	-	16	EHI_148600	protein_coding	this study	no
DS571146	120976	120993	-	17	EHI_148630	protein_coding	this study	no
DS571146	123069	123093	-	24	EHI_148640	protein_coding	this study	no
DS571146	126501	126523	-	22	EHI_148670	protein_coding	this study	no
DS571146	132108	132154	-	46	EHI_148690	protein_coding	this study	no
DS571146	132765	132804	-	39	EHI_148700	protein_coding	this study	no
DS571146	140463	140490	+	27	EHI_148720	protein_coding	this study	no
DS571146	156765	156803	+	38	EHI_148780	protein_coding	this study	no
DS571146	176149	176193	-	44	EHI_148880	protein_coding	this study	no
DS571146	179202	179208	+	6	EHI_148890	protein_coding	this study	no
DS571147	3809	3848	+	39	EHI_044470	protein_coding	this study	no
DS571147	3830	3887	-	57	EHI_044480	protein_coding	this study	no
DS571147	7711	7738	+	27	EHI_044490	protein_coding	this study	no
DS571147	11602	11621	+	19	EHI_044520	protein_coding	this study	no
DS571147	17332	17348	+	16	EHI_044550	protein_coding	this study	no
DS571147	26675	26692	-	17	EHI_044650	protein_coding	this study	no
DS571147	36688	36705	-	17	EHI_044730	protein_coding	this study	no
DS571147	42464	42471	+	7	EHI_044740	protein_coding	this study	yes
DS571147	42464	42561	+	97	EHI_044740	protein_coding	this study	yes
DS571147	45907	45931	-	24	EHI_044770	protein_coding	this study	no
DS571147	48070	48107	+	37	EHI_044790	protein_coding	this study	no
DS571147	49839	49869	+	30	EHI_044800	protein_coding	this study	no
DS571147	51316	51319	+	3	EHI_044820	protein_coding	this study	no
DS571147	56820	56829	+	9	EHI_044860	protein_coding	this study	no
DS571147	58352	58408	+	56	EHI_044880	protein_coding	this study	no
DS571147	63745	63751	-	6	EHI_044910	protein_coding	this study	no
DS571147	65722	65736	-	14	EHI_044930	protein_coding	this study	no
DS571147	69192	69214	+	22	EHI_044940	protein_coding	this study	no
DS571147	69598	69665	-	67	EHI_044950	protein_coding	this study	no
DS571147	71275	71298	-	23	EHI_044970	protein_coding	this study	no
DS571147	86406	86421	-	15	EHI_045050	protein_coding	this study	no
DS571147	88737	88757	-	20	EHI_045060	protein_coding	this study	no
DS571147	90508	90525	+	17	EHI_045070	protein_coding	this study	no
DS571147	90603	90610	-	7	EHI_045080	protein_coding	this study	no
DS571147	94837	94857	-	20	EHI_045110	protein_coding	this study	no
DS571147	99107	99118	-	11	EHI_045130	protein_coding	this study	no
DS571147	108882	108901	+	19	EHI_045180	protein_coding	this study	no
DS571147	110173	110188	+	15	EHI_045200	protein_coding	this study	no
DS571147	119641	119680	-	39	EHI_045280	protein_coding	this study	no
DS571147	121106	121130	-	24	EHI_045290	protein_coding	this study	no
DS571147	128229	128233	-	4	EHI_045310	protein_coding	this study	no
DS571147	131410	131443	-	33	EHI_045340	protein_coding	this study	no
DS571147	131425	131440	+	15	EHI_045330	protein_coding	this study	no
DS571147	136840	136997	-	157	EHI_045370	protein_coding	this study	no
DS571147	141483	141499	-	16	EHI_045400	protein_coding	this study	no
DS571147	152941	152963	+	22	EHI_045440	protein_coding	this study	no
DS571147	153989	154047	+	58	EHI_045450	protein_coding	this study	no
DS571147	154007	154076	-	69	EHI_045460	protein_coding	this study	no
DS571147	156249	156269	-	20	EHI_045480	protein_coding	this study	no
DS571147	170892	170900	-	8	EHI_045550	protein_coding	this study	no
DS571147	175241	175321	+	80	EHI_045570	protein_coding	this study	no
DS571147	177538	177551	-	13	EHI_045590	protein_coding	this study	no
DS571147	183173	183186	-	13	EHI_045610	protein_coding	this study	no
DS571148	14515	14563	+	48	EHI_011800	protein_coding	this study	yes
DS571148	14515	14600	+	85	EHI_011800	protein_coding	this study	yes
DS571148	18050	18065	-	15	EHI_011840	protein_coding	this study	no
DS571148	27949	27968	+	19	EHI_011900	protein_coding	this study	no
DS571148	30461	30480	-	19	EHI_011920	protein_coding	this study	no
DS571148	36226	36261	+	35	EHI_011940	protein_coding	this study	no
DS571148	37374	37427	+	53	EHI_011950	protein_coding	this study	yes
DS571148	37374	37454	+	80	EHI_011950	protein_coding	this study	yes
DS571148	42296	42298	+	2	EHI_011970	protein_coding	this study	no
DS571148	48005	48035	+	30	EHI_012010	protein_coding	this study	no
DS571148	51240	51274	-	34	EHI_012030	protein_coding	this study	no
DS571148	54971	54982	-	11	EHI_012060	protein_coding	this study	no
DS571148	56243	56266	-	23	EHI_012070	protein_coding	this study	no
DS571148	57165	57172	-	7	EHI_012080	protein_coding	this study	no
DS571148	71136	71151	+	15	EHI_012170	protein_coding	this study	no
DS571148	73050	73113	-	63	EHI_012190	protein_coding	this study	no
DS571148	81921	81937	+	16	EHI_012230	protein_coding	this study	no
DS571148	84990	85187	-	197	EHI_012260	protein_coding	this study	no
DS571148	86200	86225	-	25	EHI_012270	protein_coding	this study	yes
DS571148	86224	86225	-	1	EHI_012270	protein_coding	this study	yes
DS571148	94419	94487	-	68	EHI_012290	protein_coding	this study	no
DS571148	100072	100089	-	17	EHI_012310	protein_coding	this study	no
DS571148	104941	105004	-	63	EHI_012320	protein_coding	this study	no
DS571148	120905	120922	+	17	EHI_012340	protein_coding	this study	no
DS571148	126501	126502	+	1	EHI_012380	protein_coding	this study	no
DS571148	127145	127184	-	39	EHI_012390	protein_coding	this study	yes
DS571148	127179	127184	-	5	EHI_012390	protein_coding	this study	yes
DS571148	128348	128408	+	60	EHI_012400	protein_coding	this study	no
DS571148	131236	131280	-	44	EHI_012420	protein_coding	this study	no
DS571148	150252	150288	-	36	EHI_012500	protein_coding	this study	no
DS571148	152942	152964	-	22	EHI_012510	protein_coding	this study	no
DS571148	183474	183475	+	1	EHI_012590	protein_coding	this study	no
DS571148	185321	185322	+	1	EHI_012600	protein_coding	this study	no
DS571149	6326	6346	-	20	EHI_050130	protein_coding	this study	no
DS571149	8125	8186	+	61	EHI_050140	protein_coding	this study	no
DS571149	16197	16216	-	19	EHI_050300	protein_coding	this study	no
DS571149	19044	19067	-	23	EHI_050330	protein_coding	this study	no
DS571149	31913	31923	+	10	EHI_050380	protein_coding	this study	no
DS571149	33090	33132	+	42	EHI_050390	protein_coding	this study	no
DS571149	43510	43635	+	125	EHI_050460	protein_coding	this study	no
DS571149	53260	53279	+	19	EHI_050500	protein_coding	this study	no
DS571149	53348	53367	-	19	EHI_050510	protein_coding	this study	no
DS571149	61716	61755	+	39	EHI_050550	protein_coding	this study	yes
DS571149	64266	64283	+	17	EHI_050570	protein_coding	this study	no
DS571149	71968	71992	+	24	EHI_050610	protein_coding	this study	no
DS571149	71970	72012	-	42	EHI_050620	protein_coding	this study	no
DS571149	79717	79755	-	38	EHI_050650	protein_coding	this study	no
DS571149	93467	93483	+	16	EHI_050670	protein_coding	this study	no
DS571149	96080	96091	+	11	EHI_050690	protein_coding	this study	no
DS571149	96589	96630	-	41	EHI_050700	protein_coding	this study	no
DS571149	106683	106687	-	4	EHI_050760	protein_coding	this study	no
DS571149	133330	133346	-	16	EHI_050880	protein_coding	this study	no
DS571149	162953	163191	-	238	EHI_051010	protein_coding	this study	no
DS571149	168622	168636	+	14	EHI_051020	protein_coding	this study	no
DS571150	12459	12461	-	2	EHI_067880	protein_coding	this study	no
DS571150	20131	20140	+	9	EHI_067890	protein_coding	this study	no
DS571150	23005	23046	-	41	EHI_067920	protein_coding	this study	no
DS571150	29528	29601	-	73	EHI_067960	protein_coding	this study	no
DS571150	41615	41635	-	20	EHI_067980	protein_coding	this study	no
DS571150	51269	51294	-	25	EHI_068030	protein_coding	this study	no
DS571150	60035	60048	-	13	EHI_068090	protein_coding	this study	no
DS571150	66922	67044	-	122	EHI_068120	protein_coding	this study	no
DS571150	69654	69677	-	23	EHI_068140	protein_coding	this study	no
DS571150	78109	78128	+	19	EHI_068160	protein_coding	this study	no
DS571150	87761	87770	-	9	EHI_068260	protein_coding	this study	no
DS571150	92748	92788	-	40	EHI_068290	protein_coding	this study	no
DS571150	97538	97555	-	17	EHI_068320	protein_coding	this study	no
DS571150	101230	101257	+	27	EHI_068330	protein_coding	this study	no
DS571150	103754	103775	+	21	EHI_068340	protein_coding	this study	no
DS571150	112303	112324	-	21	EHI_068400	protein_coding	this study	no
DS571150	116141	116194	+	53	EHI_068410	protein_coding	this study	no
DS571150	123438	123479	+	41	EHI_068440	protein_coding	this study	no
DS571150	127424	127448	-	24	EHI_068470	protein_coding	this study	no
DS571150	128986	129006	+	20	EHI_068480	protein_coding	this study	no
DS571150	129050	129077	-	27	EHI_068490	protein_coding	this study	no
DS571150	130742	130748	-	6	EHI_068500	protein_coding	this study	yes
DS571150	134149	134194	+	45	EHI_068510	protein_coding	this study	no
DS571150	149681	149684	+	3	EHI_068560	protein_coding	this study	no
DS571150	152517	152531	+	14	EHI_068590	protein_coding	this study	no
DS571150	159207	159224	+	17	EHI_068630	protein_coding	this study	no
DS571150	161417	161477	-	60	EHI_068650	protein_coding	this study	no
DS571150	161446	161462	+	16	EHI_068640	protein_coding	this study	no
DS571150	164171	164179	+	8	EHI_068660	protein_coding	this study	yes
DS571150	169336	169358	+	22	EHI_068710	protein_coding	this study	no
DS571150	178880	178934	+	54	EHI_068750	protein_coding	this study	no
DS571151	2694	2702	+	8	EHI_110120	protein_coding	this study	no
DS571151	24205	24223	+	18	EHI_110180	protein_coding	this study	no
DS571151	27095	27119	-	24	EHI_110220	protein_coding	this study	no
DS571151	31883	31908	-	25	EHI_110250	protein_coding	this study	no
DS571151	35537	35847	-	310	EHI_110270	protein_coding	this study	no
DS571151	42305	42336	+	31	EHI_110290	protein_coding	this study	no
DS571151	43152	43159	+	7	EHI_110300	protein_coding	this study	no
DS571151	47673	47678	+	5	EHI_110330	protein_coding	this study	no
DS571151	48754	48760	-	6	EHI_110350	protein_coding	this study	no
DS571151	57011	57021	-	10	EHI_110390	protein_coding	this study	no
DS571151	60846	60864	-	18	EHI_110420	protein_coding	this study	no
DS571151	62102	62116	-	14	EHI_110430	protein_coding	this study	no
DS571151	74239	74280	+	41	EHI_110460	protein_coding	this study	no
DS571151	83456	83488	-	32	EHI_110510	protein_coding	this study	no
DS571151	91073	91087	+	14	EHI_110530	protein_coding	this study	no
DS571151	112585	112627	-	42	EHI_110610	protein_coding	this study	no
DS571151	116850	116867	-	17	EHI_110630	protein_coding	this study	no
DS571151	127099	127119	-	20	EHI_110670	protein_coding	this study	no
DS571151	129131	129150	+	19	EHI_110680	protein_coding	this study	no
DS571151	129134	129160	-	26	EHI_110690	protein_coding	this study	no
DS571151	133157	133189	-	32	EHI_110710	protein_coding	this study	no
DS571151	133971	134002	-	31	EHI_110720	protein_coding	this study	no
DS571151	143130	143148	+	18	EHI_110740	protein_coding	this study	no
DS571151	143260	143282	-	22	EHI_110750	protein_coding	this study	no
DS571151	158270	158281	+	11	EHI_110810	protein_coding	this study	yes
DS571151	162662	162670	+	8	EHI_110830	protein_coding	this study	no
DS571152	2970	2999	-	29	EHI_049290	protein_coding	this study	no
DS571152	3518	3627	-	109	EHI_049300	protein_coding	this study	yes
DS571152	3551	3627	-	76	EHI_049300	protein_coding	this study	yes
DS571152	7905	7917	+	12	EHI_049310	protein_coding	this study	no
DS571152	29978	29985	-	7	EHI_049430	protein_coding	this study	no
DS571152	37375	37377	+	2	EHI_049460	protein_coding	this study	no
DS571152	45398	45399	+	1	EHI_049480	protein_coding	this study	no
DS571152	45482	45521	-	39	EHI_049490	protein_coding	this study	no
DS571152	49472	49491	-	19	EHI_049500	protein_coding	this study	no
DS571152	50541	50604	-	63	EHI_049510	protein_coding	this study	no
DS571152	59171	59190	+	19	EHI_049570	protein_coding	this study	no
DS571152	64790	64807	+	17	EHI_049600	protein_coding	this study	no
DS571152	69029	69032	-	3	EHI_049620	protein_coding	this study	yes
DS571152	75413	75432	+	19	EHI_049640	protein_coding	this study	no
DS571152	75447	75498	-	51	EHI_049650	protein_coding	this study	no
DS571152	82647	82682	-	35	EHI_049660	protein_coding	this study	no
DS571152	92986	93005	+	19	EHI_049680	protein_coding	this study	no
DS571152	101611	101616	-	5	EHI_049710	protein_coding	this study	no
DS571152	104505	104631	-	126	EHI_049730	protein_coding	this study	no
DS571152	105877	105914	-	37	EHI_049740	protein_coding	this study	no
DS571152	120369	120392	+	23	EHI_049790	protein_coding	this study	no
DS571152	135638	135656	-	18	EHI_049900	protein_coding	this study	no
DS571152	139617	139639	+	22	EHI_049910	protein_coding	this study	no
DS571152	141317	141318	+	1	EHI_049920	protein_coding	this study	no
DS571152	143291	143305	-	14	EHI_049940	protein_coding	this study	no
DS571152	153520	153551	+	31	EHI_049970	protein_coding	this study	no
DS571152	163619	163634	+	15	EHI_049990	protein_coding	this study	yes
DS571152	163619	163678	+	59	EHI_049990	protein_coding	this study	yes
DS571153	29462	29482	+	20	EHI_022870	protein_coding	this study	no
DS571153	29470	29476	-	6	EHI_022880	protein_coding	this study	no
DS571153	31512	31532	+	20	EHI_022900	protein_coding	this study	no
DS571153	31572	31588	-	16	EHI_022910	protein_coding	this study	no
DS571153	37398	37403	+	5	EHI_022940	protein_coding	this study	no
DS571153	38427	38445	-	18	EHI_022950	protein_coding	this study	no
DS571153	45041	45064	+	23	EHI_022980	protein_coding	this study	no
DS571153	54998	55051	+	53	EHI_023010	protein_coding	this study	no
DS571153	56586	56593	+	7	EHI_023020	protein_coding	this study	no
DS571153	66307	66314	+	7	EHI_023080	protein_coding	this study	no
DS571153	67123	67262	-	139	EHI_023090	protein_coding	this study	no
DS571153	74753	74769	+	16	EHI_023120	protein_coding	this study	no
DS571153	77192	77200	+	8	EHI_023130	protein_coding	this study	no
DS571153	86816	86824	-	8	EHI_023180	protein_coding	this study	no
DS571153	92761	92767	+	6	EHI_023210	protein_coding	this study	no
DS571153	93205	93225	+	20	EHI_023220	protein_coding	this study	no
DS571153	96504	96517	+	13	EHI_023240	protein_coding	this study	no
DS571153	99784	99798	-	14	EHI_023260	protein_coding	this study	no
DS571153	101128	101186	-	58	EHI_023270	protein_coding	this study	no
DS571153	106386	106420	-	34	EHI_023300	protein_coding	this study	no
DS571153	110245	110261	-	16	EHI_023320	protein_coding	this study	no
DS571153	120268	120280	-	12	EHI_023360	protein_coding	this study	no
DS571153	144271	144307	+	36	EHI_023430	protein_coding	this study	no
DS571153	153163	153174	-	11	EHI_023470	protein_coding	this study	no
DS571153	157532	157565	+	33	EHI_023480	protein_coding	this study	no
DS571153	162268	162269	+	1	EHI_023500	protein_coding	this study	no
DS571154	737	739	-	2	EHI_178440	protein_coding	this study	no
DS571154	10737	10758	+	21	EHI_178450	protein_coding	this study	no
DS571154	24389	24408	+	19	EHI_178500	protein_coding	this study	no
DS571154	46006	46026	+	20	EHI_178580	protein_coding	this study	no
DS571154	47208	47313	-	105	EHI_178590	protein_coding	this study	yes
DS571154	47277	47313	-	36	EHI_178590	protein_coding	this study	yes
DS571154	49963	49976	-	13	EHI_178610	protein_coding	this study	no
DS571154	57183	57202	+	19	EHI_178630	protein_coding	this study	no
DS571154	57684	57722	-	38	EHI_178640	protein_coding	this study	no
DS571154	60475	60515	-	40	EHI_178670	protein_coding	this study	no
DS571154	60484	60513	+	29	EHI_178660	protein_coding	this study	no
DS571154	79180	79241	-	61	EHI_178740	protein_coding	this study	yes
DS571154	79206	79241	-	35	EHI_178740	protein_coding	this study	yes
DS571154	80920	80955	+	35	EHI_178750	protein_coding	this study	no
DS571154	86761	86767	+	6	EHI_178780	protein_coding	this study	no
DS571154	106576	106595	+	19	EHI_178880	protein_coding	this study	no
DS571154	111463	111501	+	38	EHI_178920	protein_coding	this study	no
DS571154	113067	113084	+	17	EHI_178940	protein_coding	this study	no
DS571154	120894	120898	-	4	EHI_178980	protein_coding	this study	no
DS571154	129207	129230	+	23	EHI_179020	protein_coding	this study	no
DS571154	133339	133353	+	14	EHI_179050	protein_coding	this study	no
DS571154	137528	137544	-	16	EHI_179060	protein_coding	this study	no
DS571154	142822	142835	+	13	EHI_179080	protein_coding	this study	no
DS571155	7029	7068	-	39	EHI_092080	protein_coding	this study	no
DS571155	20937	20946	-	9	EHI_092120	protein_coding	this study	no
DS571155	25557	25616	+	59	EHI_092160	protein_coding	this study	no
DS571155	27892	27899	-	7	EHI_092190	protein_coding	this study	no
DS571155	32406	32414	-	8	EHI_092220	protein_coding	this study	no
DS571155	37397	37426	+	29	EHI_092230	protein_coding	this study	no
DS571155	47993	48003	-	10	EHI_092270	protein_coding	this study	no
DS571155	58593	58621	+	28	EHI_092290	protein_coding	this study	no
DS571155	68369	68374	+	5	EHI_092320	protein_coding	this study	no
DS571155	71501	71512	-	11	EHI_092360	protein_coding	this study	no
DS571155	96867	96994	-	127	EHI_092380	protein_coding	this study	no
DS571155	100036	100065	+	29	EHI_092390	protein_coding	this study	no
DS571155	107152	107176	+	24	EHI_092450	protein_coding	this study	no
DS571155	108557	108578	+	21	EHI_092470	protein_coding	this study	no
DS571155	110406	110422	-	16	EHI_092490	protein_coding	this study	no
DS571155	114525	114582	-	57	EHI_092500	protein_coding	this study	no
DS571155	116873	116891	+	18	EHI_092510	protein_coding	this study	no
DS571155	120486	120554	-	68	EHI_092530	protein_coding	this study	no
DS571155	128294	128316	-	22	EHI_092580	protein_coding	this study	no
DS571155	133219	133258	+	39	EHI_092600	protein_coding	this study	no
DS571155	135649	135656	+	7	EHI_092620	protein_coding	this study	no
DS571155	138466	138477	-	11	EHI_092650	protein_coding	this study	no
DS571155	140162	140184	-	22	EHI_092660	protein_coding	this study	no
DS571155	146239	146262	+	23	EHI_092680	protein_coding	this study	no
DS571155	154023	154034	+	11	EHI_092730	protein_coding	this study	no
DS571156	6596	6602	+	6	EHI_182470	protein_coding	this study	no
DS571156	6725	6744	-	19	EHI_182480	protein_coding	this study	no
DS571156	14719	14752	+	33	EHI_182520	protein_coding	this study	no
DS571156	18042	18059	-	17	EHI_182560	protein_coding	this study	no
DS571156	21947	21972	-	25	EHI_182590	protein_coding	this study	no
DS571156	30373	30437	+	64	EHI_182660	protein_coding	this study	no
DS571156	42705	42725	-	20	EHI_182750	protein_coding	this study	no
DS571156	48939	48957	+	18	EHI_182770	protein_coding	this study	no
DS571156	49008	49025	-	17	EHI_182780	protein_coding	this study	no
DS571156	51635	51675	+	40	EHI_182790	protein_coding	this study	no
DS571156	52095	52119	-	24	EHI_182810	protein_coding	this study	no
DS571156	55958	56042	+	84	EHI_182820	protein_coding	this study	no
DS571156	59106	59126	-	20	EHI_182850	protein_coding	this study	no
DS571156	64053	64087	-	34	EHI_182890	protein_coding	this study	no
DS571156	65483	65509	-	26	EHI_182900	protein_coding	this study	yes
DS571156	74885	74906	-	21	EHI_182940	protein_coding	this study	no
DS571156	82017	82032	-	15	EHI_182960	protein_coding	this study	no
DS571156	84103	84109	+	6	EHI_182970	protein_coding	this study	no
DS571156	84224	84238	-	14	EHI_182980	protein_coding	this study	yes
DS571156	86035	86054	+	19	EHI_182990	protein_coding	this study	no
DS571156	86280	86313	-	33	EHI_183000	protein_coding	this study	no
DS571156	89572	89589	-	17	EHI_183010	protein_coding	this study	no
DS571156	94119	94140	-	21	EHI_183060	protein_coding	this study	no
DS571156	101458	101657	+	199	EHI_183090	protein_coding	this study	no
DS571156	105508	105748	-	240	EHI_183120	protein_coding	this study	yes
DS571156	105662	105748	-	86	EHI_183120	protein_coding	this study	yes
DS571156	116771	116795	+	24	EHI_183160	protein_coding	this study	no
DS571156	122505	122587	-	82	EHI_183190	protein_coding	this study	no
DS571156	143044	143057	+	13	EHI_183240	protein_coding	this study	no
DS571156	143374	143397	-	23	EHI_183250	protein_coding	this study	yes
DS571156	148829	149457	+	628	EHI_183290	protein_coding	this study	no
DS571157	12400	12417	-	17	EHI_196890	protein_coding	this study	no
DS571157	18253	18283	-	30	EHI_196930	protein_coding	this study	no
DS571157	23063	23084	+	21	EHI_196940	protein_coding	this study	no
DS571157	24691	24769	+	78	EHI_196950	protein_coding	this study	no
DS571157	32700	110500	-	77800	EHI_197340	protein_coding	this study	yes
DS571157	40814	40870	+	56	EHI_197010	protein_coding	this study	no
DS571157	40921	40944	-	23	EHI_197020	protein_coding	this study	no
DS571157	42276	42312	-	36	EHI_197040	protein_coding	this study	no
DS571157	45261	45279	-	18	EHI_197050	protein_coding	this study	no
DS571157	48967	48975	-	8	EHI_197080	protein_coding	this study	no
DS571157	65650	65674	+	24	EHI_197160	protein_coding	this study	no
DS571157	71601	71620	+	19	EHI_197170	protein_coding	this study	no
DS571157	90894	90895	+	1	EHI_197270	protein_coding	this study	no
DS571157	95510	95527	-	17	EHI_197300	protein_coding	this study	no
DS571157	99242	99261	-	19	EHI_197310	protein_coding	this study	no
DS571157	108930	110500	-	1570	EHI_197340	protein_coding	this study	yes
DS571157	119692	119695	+	3	EHI_197370	protein_coding	this study	no
DS571157	121995	122023	-	28	EHI_197390	protein_coding	this study	no
DS571157	127541	127559	+	18	EHI_197410	protein_coding	this study	no
DS571157	131320	131357	-	37	EHI_197450	protein_coding	this study	no
DS571157	139752	139761	+	9	EHI_197510	protein_coding	this study	no
DS571157	141012	141031	-	19	EHI_197520	protein_coding	this study	no
DS571158	21677	21678	+	1	EHI_103280	protein_coding	this study	no
DS571158	23989	24037	-	48	EHI_103300	protein_coding	this study	no
DS571158	37619	37637	+	18	EHI_103390	protein_coding	this study	no
DS571158	39356	39381	-	25	EHI_103410	protein_coding	this study	no
DS571158	43993	44010	+	17	EHI_103420	protein_coding	this study	no
DS571158	45983	46016	+	33	EHI_103430	protein_coding	this study	no
DS571158	48393	48430	+	37	EHI_103450	protein_coding	this study	no
DS571158	52956	52973	-	17	EHI_103500	protein_coding	this study	no
DS571158	64866	64885	-	19	EHI_103550	protein_coding	this study	no
DS571158	69681	69756	+	75	EHI_103580	protein_coding	this study	no
DS571158	78469	78491	+	22	EHI_103590	protein_coding	this study	no
DS571158	80483	80522	-	39	EHI_103610	protein_coding	this study	no
DS571158	95086	95119	-	33	EHI_103690	protein_coding	this study	no
DS571158	105204	105223	+	19	EHI_103720	protein_coding	this study	no
DS571158	107615	107617	+	2	EHI_103730	protein_coding	this study	yes
DS571158	107615	107640	+	25	EHI_103730	protein_coding	this study	yes
DS571158	114670	114690	-	20	EHI_103750	protein_coding	this study	no
DS571158	122890	122893	-	3	EHI_103800	protein_coding	this study	no
DS571158	123448	123467	-	19	EHI_103810	protein_coding	this study	no
DS571158	135512	135523	+	11	EHI_103850	protein_coding	this study	no
DS571159	11146	11177	+	31	EHI_186330	protein_coding	this study	no
DS571159	27939	27978	-	39	EHI_186730	protein_coding	this study	no
DS571159	30369	30404	+	35	EHI_186740	protein_coding	this study	no
DS571159	32043	32057	-	14	EHI_186760	protein_coding	this study	no
DS571159	38137	38159	+	22	EHI_186770	protein_coding	this study	no
DS571159	41181	41216	+	35	EHI_186790	protein_coding	this study	no
DS571159	47992	48013	+	21	EHI_186820	protein_coding	this study	no
DS571159	48495	48523	+	28	EHI_186830	protein_coding	this study	yes
DS571159	58987	58994	+	7	EHI_186880	protein_coding	this study	no
DS571159	66849	66855	+	6	EHI_186920	protein_coding	this study	no
DS571159	70961	70999	+	38	EHI_186950	protein_coding	this study	no
DS571159	71050	71055	-	5	EHI_186960	protein_coding	this study	no
DS571159	72136	72145	+	9	EHI_186970	protein_coding	this study	no
DS571159	75821	75838	+	17	EHI_186990	protein_coding	this study	no
DS571159	85430	85499	+	69	EHI_187040	protein_coding	this study	no
DS571159	94936	94955	-	19	EHI_187080	protein_coding	this study	no
DS571159	98535	98542	+	7	EHI_187090	protein_coding	this study	no
DS571159	110564	110583	+	19	EHI_187140	protein_coding	this study	no
DS571159	112028	112048	-	20	EHI_187160	protein_coding	this study	no
DS571159	118676	118712	+	36	EHI_187180	protein_coding	this study	no
DS571159	118725	118737	-	12	EHI_187190	protein_coding	this study	no
DS571159	124234	124235	+	1	EHI_187220	protein_coding	this study	no
DS571159	125579	125604	+	25	EHI_187230	protein_coding	this study	no
DS571159	129618	129632	-	14	EHI_187270	protein_coding	this study	no
DS571159	135643	135650	+	7	EHI_187280	protein_coding	this study	no
DS571160	15871	15877	+	6	EHI_125630	protein_coding	this study	no
DS571160	22654	22667	+	13	EHI_125660	protein_coding	this study	no
DS571160	27996	28014	+	18	EHI_125690	protein_coding	this study	no
DS571160	29197	29200	+	3	EHI_125700	protein_coding	this study	no
DS571160	29259	29265	-	6	EHI_125710	protein_coding	this study	no
DS571160	30585	30600	-	15	EHI_125720	protein_coding	this study	no
DS571160	32174	32222	-	48	EHI_125730	protein_coding	this study	no
DS571160	34221	34234	-	13	EHI_125740	protein_coding	this study	no
DS571160	37215	37257	-	42	EHI_125760	protein_coding	this study	no
DS571160	48450	48470	+	20	EHI_125830	protein_coding	this study	no
DS571160	52120	52145	+	25	EHI_125860	protein_coding	this study	no
DS571160	52125	52144	-	19	EHI_125870	protein_coding	this study	no
DS571160	72895	72913	-	18	EHI_125940	protein_coding	this study	no
DS571160	78520	78536	-	16	EHI_125970	protein_coding	this study	no
DS571160	84263	84281	+	18	EHI_126010	protein_coding	this study	no
DS571160	84292	84302	-	10	EHI_126020	protein_coding	this study	no
DS571160	93412	93484	-	72	EHI_126060	protein_coding	this study	no
DS571160	96865	96878	-	13	EHI_126080	protein_coding	this study	no
DS571160	105121	105133	+	12	EHI_126110	protein_coding	this study	yes
DS571160	122851	122854	+	3	EHI_126210	protein_coding	this study	no
DS571160	124461	124482	+	21	EHI_126220	protein_coding	this study	no
DS571160	131299	131342	+	43	EHI_126250	protein_coding	this study	no
DS571160	134895	134918	+	23	EHI_126270	protein_coding	this study	no
DS571160	135153	135199	-	46	EHI_126280	protein_coding	this study	no
DS571160	138367	138373	-	6	EHI_126310	protein_coding	this study	no
DS571161	15777	15846	-	69	EHI_141370	protein_coding	this study	no
DS571161	45932	45934	-	2	EHI_141850	protein_coding	this study	no
DS571161	51906	51934	-	28	EHI_141860	protein_coding	this study	no
DS571161	65541	65548	+	7	EHI_141930	protein_coding	this study	no
DS571161	84615	84621	-	6	EHI_142040	protein_coding	this study	no
DS571161	88457	88486	-	29	EHI_142060	protein_coding	this study	no
DS571161	92010	92030	+	20	EHI_142090	protein_coding	this study	no
DS571161	92176	92202	-	26	EHI_142100	protein_coding	this study	no
DS571161	101780	101785	-	5	EHI_142150	protein_coding	this study	no
DS571161	109102	109120	+	18	EHI_142170	protein_coding	this study	no
DS571161	110895	110899	-	4	EHI_142190	protein_coding	this study	no
DS571161	116684	116774	-	90	EHI_142220	protein_coding	this study	yes
DS571161	122505	122527	+	22	EHI_142250	protein_coding	this study	no
DS571162	13159	13187	+	28	EHI_155160	protein_coding	this study	no
DS571162	15942	15955	+	13	EHI_155170	protein_coding	this study	no
DS571162	22733	22738	-	5	EHI_155220	protein_coding	this study	no
DS571162	25829	25846	+	17	EHI_155240	protein_coding	this study	no
DS571162	28019	28056	+	37	EHI_155250	protein_coding	this study	no
DS571162	29463	29610	+	147	EHI_155270	protein_coding	this study	no
DS571162	29690	29755	-	65	EHI_155280	protein_coding	this study	no
DS571162	32759	32779	+	20	EHI_155290	protein_coding	this study	no
DS571162	37868	37921	-	53	EHI_155350	protein_coding	this study	no
DS571162	37886	37904	+	18	EHI_155340	protein_coding	this study	no
DS571162	38531	38556	-	25	EHI_155360	protein_coding	this study	no
DS571162	41474	41498	+	24	EHI_155370	protein_coding	this study	no
DS571162	42012	42028	+	16	EHI_155380	protein_coding	this study	no
DS571162	45042	45059	+	17	EHI_155420	protein_coding	this study	no
DS571162	61324	61332	+	8	EHI_155450	protein_coding	this study	no
DS571162	65603	65621	-	18	EHI_155490	protein_coding	this study	no
DS571162	74070	74073	+	3	EHI_155520	protein_coding	this study	no
DS571162	74122	74145	-	23	EHI_155530	protein_coding	this study	no
DS571162	77329	77342	-	13	EHI_155540	protein_coding	this study	no
DS571162	79677	79686	-	9	EHI_155560	protein_coding	this study	no
DS571162	83897	83943	-	46	EHI_155590	protein_coding	this study	no
DS571162	93190	93449	-	259	EHI_155630	protein_coding	this study	no
DS571162	107621	107632	+	11	EHI_155680	protein_coding	this study	no
DS571162	109467	109479	-	12	EHI_155700	protein_coding	this study	no
DS571162	115825	115934	-	109	EHI_155720	protein_coding	this study	no
DS571162	117161	117183	-	22	EHI_155730	protein_coding	this study	no
DS571162	120258	120279	+	21	EHI_155740	protein_coding	this study	no
DS571162	128945	128963	+	18	EHI_155780	protein_coding	this study	no
DS571163	5780	5866	+	86	EHI_096170	protein_coding	this study	no
DS571163	11266	11284	+	18	EHI_096210	protein_coding	this study	no
DS571163	12122	12173	+	51	EHI_096220	protein_coding	this study	no
DS571163	14363	14367	+	4	EHI_096230	protein_coding	this study	no
DS571163	15105	15123	-	18	EHI_096250	protein_coding	this study	no
DS571163	19493	19507	+	14	EHI_096260	protein_coding	this study	no
DS571163	22031	22056	+	25	EHI_096280	protein_coding	this study	no
DS571163	29675	29696	+	21	EHI_096320	protein_coding	this study	no
DS571163	40840	40846	+	6	EHI_096370	protein_coding	this study	no
DS571163	42962	42980	+	18	EHI_096380	protein_coding	this study	no
DS571163	43042	43088	-	46	EHI_096390	protein_coding	this study	no
DS571163	46370	46397	-	27	EHI_096410	protein_coding	this study	yes
DS571163	47121	47149	-	28	EHI_096420	protein_coding	this study	no
DS571163	49804	49823	-	19	EHI_096450	protein_coding	this study	no
DS571163	53135	53160	-	25	EHI_096470	protein_coding	this study	no
DS571163	54373	54428	-	55	EHI_096480	protein_coding	this study	no
DS571163	59998	60005	+	7	EHI_096500	protein_coding	this study	no
DS571163	63229	63289	-	60	EHI_096530	protein_coding	this study	yes
DS571163	69780	69788	-	8	EHI_096570	protein_coding	this study	yes
DS571163	72620	72668	-	48	EHI_096580	protein_coding	this study	no
DS571163	77502	77516	-	14	EHI_096620	protein_coding	this study	no
DS571163	84163	84203	-	40	EHI_096650	protein_coding	this study	yes
DS571163	101339	101378	-	39	EHI_096700	protein_coding	this study	no
DS571163	106538	106541	+	3	EHI_096710	protein_coding	this study	no
DS571163	110976	110997	-	21	EHI_096750	protein_coding	this study	no
DS571163	116891	116907	-	16	EHI_096790	protein_coding	this study	no
DS571163	120415	120432	+	17	EHI_096810	protein_coding	this study	no
DS571163	121132	121208	+	76	EHI_096820	protein_coding	this study	no
DS571163	124219	124236	+	17	EHI_096830	protein_coding	this study	no
DS571164	10004	10016	+	12	EHI_069060	protein_coding	this study	no
DS571164	31217	31498	-	281	EHI_069180	protein_coding	this study	no
DS571164	37965	37986	-	21	EHI_069200	protein_coding	this study	no
DS571164	46024	46040	+	16	EHI_069220	protein_coding	this study	no
DS571164	47401	47402	+	1	EHI_069230	protein_coding	this study	no
DS571164	55910	55911	+	1	EHI_069270	protein_coding	this study	no
DS571164	55983	56024	-	41	EHI_069280	protein_coding	this study	no
DS571164	70018	70019	+	1	EHI_069370	protein_coding	this study	no
DS571164	86288	86322	-	34	EHI_069410	protein_coding	this study	no
DS571164	92005	92074	-	69	EHI_069440	protein_coding	this study	no
DS571164	93229	93250	-	21	EHI_069450	protein_coding	this study	no
DS571164	98182	98201	+	19	EHI_069460	protein_coding	this study	no
DS571164	100172	100221	-	49	EHI_069480	protein_coding	this study	no
DS571164	105365	105392	+	27	EHI_069500	protein_coding	this study	no
DS571164	105378	105410	-	32	EHI_069510	protein_coding	this study	no
DS571164	116156	116185	-	29	EHI_069540	protein_coding	this study	no
DS571164	119439	119449	+	10	EHI_069550	protein_coding	this study	no
DS571164	127957	127966	+	9	EHI_069630	protein_coding	this study	no
DS571165	796	856	-	60	EHI_198550	protein_coding	this study	no
DS571165	9137	9160	+	23	EHI_198600	protein_coding	this study	no
DS571165	9842	9861	+	19	EHI_198610	protein_coding	this study	no
DS571165	13822	13832	+	10	EHI_198620	protein_coding	this study	no
DS571165	23557	23592	-	35	EHI_198660	protein_coding	this study	yes
DS571165	23591	23592	-	1	EHI_198660	protein_coding	this study	yes
DS571165	25751	25780	-	29	EHI_198670	protein_coding	this study	yes
DS571165	29764	29780	+	16	EHI_198690	protein_coding	this study	no
DS571165	29823	29837	-	14	EHI_198700	protein_coding	this study	no
DS571165	38453	42908	+	4455	EHI_198760	protein_coding	this study	yes
DS571165	38453	68539	+	30086	EHI_198760	protein_coding	this study	yes
DS571165	39889	39918	-	29	EHI_198780	protein_coding	this study	no
DS571165	41780	41807	-	27	EHI_198790	protein_coding	this study	no
DS571165	60677	60694	+	17	EHI_198880	protein_coding	this study	no
DS571165	75182	75183	+	1	EHI_198930	protein_coding	this study	yes
DS571165	102478	102497	-	19	EHI_199050	protein_coding	this study	no
DS571165	103743	103775	-	32	EHI_199060	protein_coding	this study	no
DS571165	107543	107548	+	5	EHI_199080	protein_coding	this study	no
DS571166	3133	3148	-	15	EHI_126870	protein_coding	this study	no
DS571166	5240	5249	-	9	EHI_126890	protein_coding	this study	no
DS571166	6289	6309	-	20	EHI_126900	protein_coding	this study	no
DS571166	13957	13976	+	19	EHI_126930	protein_coding	this study	no
DS571166	16018	16060	+	42	EHI_126950	protein_coding	this study	no
DS571166	16560	16582	+	22	EHI_126960	protein_coding	this study	no
DS571166	20004	20058	+	54	EHI_126980	protein_coding	this study	no
DS571166	20162	20177	-	15	EHI_126990	protein_coding	this study	no
DS571166	30078	30120	+	42	EHI_127030	protein_coding	this study	no
DS571166	46392	46418	-	26	EHI_127140	protein_coding	this study	no
DS571166	53402	53425	+	23	EHI_127180	protein_coding	this study	no
DS571166	69457	69462	+	5	EHI_127240	protein_coding	this study	no
DS571166	71460	71477	+	17	EHI_127250	protein_coding	this study	no
DS571166	72390	72438	+	48	EHI_127260	protein_coding	this study	no
DS571166	73970	74002	-	32	EHI_127280	protein_coding	this study	no
DS571166	73979	73993	+	14	EHI_127270	protein_coding	this study	no
DS571166	85988	86016	-	28	EHI_127330	protein_coding	this study	yes
DS571166	89621	89637	+	16	EHI_127340	protein_coding	this study	no
DS571166	90109	90133	-	24	EHI_127360	protein_coding	this study	yes
DS571166	93532	93551	+	19	EHI_127380	protein_coding	this study	no
DS571166	102210	102227	+	17	EHI_127410	protein_coding	this study	no
DS571166	113483	113532	-	49	EHI_127460	protein_coding	this study	no
DS571167	21560	21639	+	79	EHI_159300	protein_coding	this study	no
DS571167	34742	34749	-	7	EHI_159490	protein_coding	this study	no
DS571167	36010	36027	-	17	EHI_159500	protein_coding	this study	no
DS571167	40838	41045	+	207	EHI_159520	protein_coding	this study	no
DS571167	43091	43116	+	25	EHI_159550	protein_coding	this study	no
DS571167	44902	44956	-	54	EHI_159580	protein_coding	this study	no
DS571167	54342	54356	+	14	EHI_159630	protein_coding	this study	no
DS571167	55791	55802	+	11	EHI_159640	protein_coding	this study	no
DS571167	59350	59367	-	17	EHI_159680	protein_coding	this study	no
DS571167	60420	60441	-	21	EHI_159690	protein_coding	this study	no
DS571167	69642	70334	-	692	EHI_159740	nontranslating_CDS	this study	no
DS571167	100505	100523	-	18	EHI_159860	protein_coding	this study	no
DS571167	103648	103671	-	23	EHI_159870	protein_coding	this study	no
DS571167	110401	110419	-	18	EHI_159900	protein_coding	this study	no
DS571168	14067	14108	+	41	EHI_012930	protein_coding	this study	no
DS571168	20009	20026	+	17	EHI_012950	protein_coding	this study	no
DS571168	21626	21955	-	329	EHI_012970	protein_coding	this study	no
DS571168	29513	29545	+	32	EHI_013000	protein_coding	this study	no
DS571168	29528	29547	-	19	EHI_013010	protein_coding	this study	no
DS571168	54350	55033	+	683	EHI_013060	nontranslating_CDS	this study	no
DS571168	81239	81257	+	18	EHI_013170	protein_coding	this study	no
DS571168	84885	84913	-	28	EHI_013190	protein_coding	this study	no
DS571168	88272	88393	+	121	EHI_013200	protein_coding	this study	no
DS571168	93050	93059	+	9	EHI_013220	protein_coding	this study	no
DS571168	104685	104715	-	30	EHI_013280	protein_coding	this study	no
DS571168	111912	111978	+	66	EHI_013300	protein_coding	this study	no
DS571168	112510	112523	-	13	EHI_013320	protein_coding	this study	no
DS571168	116419	116461	+	42	EHI_013340	protein_coding	this study	no
DS571169	13469	13534	-	65	EHI_098220	protein_coding	this study	no
DS571169	32439	32486	-	47	EHI_098340	protein_coding	this study	no
DS571169	35944	35970	-	26	EHI_098350	protein_coding	this study	no
DS571169	46151	46171	-	20	EHI_098360	protein_coding	this study	no
DS571169	58297	58318	+	21	EHI_098390	protein_coding	this study	no
DS571169	74232	74356	+	124	EHI_098440	protein_coding	this study	no
DS571169	81438	81458	-	20	EHI_098470	protein_coding	this study	no
DS571169	83320	83329	-	9	EHI_098490	protein_coding	this study	no
DS571169	91316	91335	+	19	EHI_098510	protein_coding	this study	no
DS571169	91356	91358	-	2	EHI_098520	protein_coding	this study	no
DS571169	95692	95726	-	34	EHI_098550	protein_coding	this study	no
DS571169	98738	98763	+	25	EHI_098560	protein_coding	this study	no
DS571169	101654	101659	-	5	EHI_098570	protein_coding	this study	yes
DS571169	103689	103736	-	47	EHI_098580	protein_coding	this study	no
DS571170	10378	10410	+	32	EHI_130650	protein_coding	this study	no
DS571170	10934	10953	-	19	EHI_130660	protein_coding	this study	no
DS571170	12061	12078	+	17	EHI_130670	protein_coding	this study	no
DS571170	14822	14836	+	14	EHI_130690	protein_coding	this study	no
DS571170	19611	19617	+	6	EHI_130720	protein_coding	this study	yes
DS571170	20194	20200	-	6	EHI_130730	protein_coding	this study	no
DS571170	20988	21044	-	56	EHI_130740	protein_coding	this study	no
DS571170	24194	24197	+	3	EHI_130850	protein_coding	this study	no
DS571170	25763	25785	-	22	EHI_130870	protein_coding	this study	no
DS571170	28819	28843	+	24	EHI_130880	protein_coding	this study	no
DS571170	28837	28856	-	19	EHI_130890	protein_coding	this study	no
DS571170	31818	31828	-	10	EHI_130900	protein_coding	this study	no
DS571170	42043	42047	+	4	EHI_130920	protein_coding	this study	no
DS571170	45145	45159	+	14	EHI_130950	protein_coding	this study	no
DS571170	55860	55867	+	7	EHI_130990	protein_coding	this study	no
DS571170	57044	57072	+	28	EHI_131000	protein_coding	this study	no
DS571170	64665	64685	+	20	EHI_131030	protein_coding	this study	no
DS571170	66512	66557	-	45	EHI_131050	protein_coding	this study	no
DS571170	76851	76872	+	21	EHI_131080	protein_coding	this study	no
DS571170	76885	76887	-	2	EHI_131090	protein_coding	this study	no
DS571170	82452	82464	-	12	EHI_131140	protein_coding	this study	no
DS571170	85965	85989	+	24	EHI_131150	protein_coding	this study	no
DS571170	87421	87422	+	1	EHI_131160	protein_coding	this study	no
DS571170	88642	88673	-	31	EHI_131180	protein_coding	this study	no
DS571170	91305	91317	-	12	EHI_131200	protein_coding	this study	no
DS571170	95304	95324	-	20	EHI_131230	protein_coding	this study	yes
DS571171	11022	11047	+	25	EHI_073330	protein_coding	this study	no
DS571171	18447	18473	+	26	EHI_073380	protein_coding	this study	no
DS571171	20212	20230	+	18	EHI_073390	protein_coding	this study	no
DS571171	27207	27697	+	490	EHI_073420	protein_coding	this study	no
DS571171	60849	60875	+	26	EHI_073600	protein_coding	this study	no
DS571171	69091	69110	-	19	EHI_073630	protein_coding	this study	no
DS571171	92034	92037	+	3	EHI_073650	protein_coding	this study	yes
DS571171	100721	100755	-	34	EHI_073670	protein_coding	this study	no
DS571172	8943	8993	-	50	EHI_013895	protein_coding	this study	yes
DS571172	37544	37566	+	22	EHI_014010	protein_coding	this study	no
DS571172	47107	47139	+	32	EHI_014060	protein_coding	this study	no
DS571172	49228	49235	+	7	EHI_014070	protein_coding	this study	no
DS571172	54498	54534	+	36	EHI_014110	protein_coding	this study	no
DS571172	67330	67375	+	45	EHI_014160	protein_coding	this study	no
DS571172	74911	74980	+	69	EHI_014190	protein_coding	this study	no
DS571172	92063	92078	+	15	EHI_014320	protein_coding	this study	no
DS571172	107439	107459	-	20	EHI_014410	protein_coding	this study	no
DS571173	14315	14326	-	11	EHI_087360	protein_coding	this study	no
DS571173	16921	16947	+	26	EHI_087380	protein_coding	this study	no
DS571173	18466	18483	+	17	EHI_087390	protein_coding	this study	no
DS571173	35219	35275	-	56	EHI_087560	protein_coding	this study	no
DS571173	37502	37508	+	6	EHI_087570	protein_coding	this study	no
DS571173	42346	42356	+	10	EHI_087610	protein_coding	this study	yes
DS571173	42346	42379	+	33	EHI_087610	protein_coding	this study	yes
DS571173	47927	47999	+	72	EHI_087650	protein_coding	this study	no
DS571173	47960	47983	-	23	EHI_087660	protein_coding	this study	no
DS571173	57490	57569	-	79	EHI_087700	protein_coding	this study	no
DS571173	60494	60580	+	86	EHI_087710	protein_coding	this study	no
DS571173	60640	60685	-	45	EHI_087720	protein_coding	this study	yes
DS571173	60667	60685	-	18	EHI_087720	protein_coding	this study	yes
DS571173	69183	69208	+	25	EHI_087740	protein_coding	this study	no
DS571173	70747	70812	-	65	EHI_087760	protein_coding	this study	no
DS571173	77407	77438	-	31	EHI_087800	protein_coding	this study	no
DS571173	89610	89648	+	38	EHI_087840	protein_coding	this study	no
DS571173	90112	90133	-	21	EHI_087850	protein_coding	this study	no
DS571173	94721	94725	+	4	EHI_087870	protein_coding	this study	no
DS571174	11653	11664	-	11	EHI_035420	protein_coding	this study	no
DS571174	12505	12509	-	4	EHI_035430	protein_coding	this study	no
DS571174	31114	31129	+	15	EHI_035500	protein_coding	this study	no
DS571174	40845	40867	+	22	EHI_035550	protein_coding	this study	no
DS571174	60312	60313	-	1	EHI_035630	protein_coding	this study	no
DS571174	62084	62091	-	7	EHI_035650	protein_coding	this study	no
DS571174	65176	65180	+	4	EHI_035670	protein_coding	this study	no
DS571174	68147	68166	-	19	EHI_035690	protein_coding	this study	yes
DS571174	72040	72060	-	20	EHI_035710	protein_coding	this study	no
DS571174	78754	78778	+	24	EHI_035730	protein_coding	this study	no
DS571174	81499	81529	-	30	EHI_035750	protein_coding	this study	no
DS571174	84119	84125	-	6	EHI_035770	protein_coding	this study	no
DS571174	89251	89271	+	20	EHI_035790	protein_coding	this study	no
DS571175	4803	4814	-	11	EHI_176980	protein_coding	this study	no
DS571175	10722	10784	+	62	EHI_176990	protein_coding	this study	no
DS571175	26045	26113	-	68	EHI_177190	protein_coding	this study	yes
DS571175	33700	33753	-	53	EHI_177300	protein_coding	this study	no
DS571175	38502	38513	-	11	EHI_177320	protein_coding	this study	no
DS571175	48087	48110	+	23	EHI_177370	protein_coding	this study	no
DS571175	58645	58918	+	273	EHI_177430	protein_coding	this study	no
DS571175	63784	63793	+	9	EHI_177460	protein_coding	this study	no
DS571175	66054	66086	+	32	EHI_177470	protein_coding	this study	no
DS571175	70198	70207	+	9	EHI_177510	protein_coding	this study	no
DS571175	73450	73459	-	9	EHI_177540	protein_coding	this study	no
DS571175	77157	77192	+	35	EHI_177560	protein_coding	this study	no
DS571175	82065	82069	+	4	EHI_177590	protein_coding	this study	no
DS571175	85301	85329	+	28	EHI_177620	protein_coding	this study	no
DS571175	88314	88358	-	44	EHI_177630	protein_coding	this study	yes
DS571175	88356	88358	-	2	EHI_177630	protein_coding	this study	yes
DS571175	91160	91180	-	20	EHI_177650	protein_coding	this study	no
DS571175	92006	92024	-	18	EHI_177660	protein_coding	this study	no
DS571176	13321	13334	-	13	EHI_051420	protein_coding	this study	no
DS571176	29950	30050	+	100	EHI_051700	protein_coding	this study	no
DS571176	30988	31001	-	13	EHI_051710	protein_coding	this study	no
DS571176	34874	34891	+	17	EHI_051730	protein_coding	this study	no
DS571176	40015	40034	-	19	EHI_051750	protein_coding	this study	no
DS571176	51670	51712	-	42	EHI_051810	protein_coding	this study	no
DS571176	56521	56553	-	32	EHI_051830	protein_coding	this study	no
DS571176	81091	81125	+	34	EHI_051890	protein_coding	this study	no
DS571177	7420	7448	-	28	EHI_166800	protein_coding	this study	no
DS571177	11154	11172	+	18	EHI_166810	protein_coding	this study	no
DS571177	21370	21392	-	22	EHI_166870	protein_coding	this study	no
DS571177	28675	28694	+	19	EHI_166900	protein_coding	this study	no
DS571177	35974	35984	+	10	EHI_166920	protein_coding	this study	no
DS571177	53584	53592	-	8	EHI_166970	protein_coding	this study	no
DS571177	54723	54730	-	7	EHI_166980	protein_coding	this study	no
DS571177	63407	63430	-	23	EHI_167020	protein_coding	this study	no
DS571177	66282	66320	+	38	EHI_167030	protein_coding	this study	no
DS571177	71065	71069	+	4	EHI_167060	protein_coding	this study	no
DS571177	73478	73503	+	25	EHI_167080	protein_coding	this study	no
DS571177	73859	73882	-	23	EHI_167090	protein_coding	this study	yes
DS571177	74785	74844	-	59	EHI_167100	protein_coding	this study	no
DS571177	76002	76024	+	22	EHI_167110	protein_coding	this study	no
DS571177	81797	81831	+	34	EHI_167130	protein_coding	this study	no
DS571178	8376	8398	+	22	EHI_007490	protein_coding	this study	no
DS571178	8396	8510	-	114	EHI_007500	protein_coding	this study	no
DS571178	13789	14400	+	611	EHI_007620	protein_coding	this study	no
DS571178	18774	18811	+	37	EHI_007640	protein_coding	this study	no
DS571178	22860	22924	-	64	EHI_007770	protein_coding	this study	no
DS571178	31537	31565	-	28	EHI_007920	protein_coding	this study	no
DS571178	35622	35626	-	4	EHI_007940	protein_coding	this study	no
DS571178	36253	36286	-	33	EHI_007950	protein_coding	this study	no
DS571178	38938	38944	-	6	EHI_007960	protein_coding	this study	no
DS571178	39475	39488	-	13	EHI_007970	protein_coding	this study	no
DS571178	44325	44326	+	1	EHI_007990	protein_coding	this study	yes
DS571178	44325	44359	+	34	EHI_007990	protein_coding	this study	yes
DS571178	47874	47926	-	52	EHI_008020	protein_coding	this study	no
DS571178	57164	57173	-	9	EHI_008050	protein_coding	this study	no
DS571178	69002	69022	-	20	EHI_008110	protein_coding	this study	no
DS571178	70868	70969	-	101	EHI_008120	protein_coding	this study	no
DS571178	74432	74441	+	9	EHI_008130	protein_coding	this study	no
DS571178	77463	77468	+	5	EHI_008150	protein_coding	this study	no
DS571178	79234	79243	-	9	EHI_008170	protein_coding	this study	no
DS571178	87724	87732	-	8	EHI_008210	protein_coding	this study	no
DS571178	90997	91040	+	43	EHI_008220	protein_coding	this study	no
DS571178	91919	91924	+	5	EHI_008230	protein_coding	this study	no
DS571179	3658	3719	+	61	EHI_093570	protein_coding	this study	no
DS571179	9710	9745	+	35	EHI_093710	protein_coding	this study	no
DS571179	13023	13030	+	7	EHI_093730	protein_coding	this study	no
DS571179	14214	14241	-	27	EHI_093750	protein_coding	this study	no
DS571179	17848	17861	-	13	EHI_093770	protein_coding	this study	no
DS571179	22963	22966	-	3	EHI_093790	protein_coding	this study	no
DS571179	24599	24619	-	20	EHI_093800	protein_coding	this study	no
DS571179	33163	33195	+	32	EHI_093840	protein_coding	this study	no
DS571179	43387	43405	+	18	EHI_093870	protein_coding	this study	no
DS571179	43428	43449	-	21	EHI_093880	protein_coding	this study	no
DS571179	51422	51442	-	20	EHI_093900	protein_coding	this study	no
DS571179	66375	66389	+	14	EHI_093970	protein_coding	this study	no
DS571179	83791	83843	-	52	EHI_094090	protein_coding	this study	no
DS571179	86377	86395	+	18	EHI_094100	protein_coding	this study	yes
DS571179	86377	86423	+	46	EHI_094100	protein_coding	this study	yes
DS571180	15283	15337	+	54	EHI_118460	protein_coding	this study	no
DS571180	16959	16968	+	9	EHI_118470	protein_coding	this study	no
DS571180	19634	19646	+	12	EHI_118480	protein_coding	this study	no
DS571180	23573	23586	-	13	EHI_118600	protein_coding	this study	no
DS571180	43346	43377	-	31	EHI_118670	protein_coding	this study	no
DS571180	50695	50736	-	41	EHI_118710	protein_coding	this study	no
DS571180	52192	52208	+	16	EHI_118720	protein_coding	this study	no
DS571180	58587	58629	-	42	EHI_118770	protein_coding	this study	no
DS571180	61229	61236	-	7	EHI_118780	protein_coding	this study	no
DS571180	72247	72249	+	2	EHI_118810	protein_coding	this study	no
DS571180	72691	72704	-	13	EHI_118820	protein_coding	this study	no
DS571180	89050	89071	-	21	EHI_118900	protein_coding	this study	no
DS571180	90438	90459	-	21	EHI_118910	protein_coding	this study	no
DS571181	2706	2709	+	3	EHI_004170	protein_coding	this study	no
DS571181	8265	8276	-	11	EHI_004190	protein_coding	this study	no
DS571181	10965	10969	+	4	EHI_004200	protein_coding	this study	no
DS571181	15598	15606	+	8	EHI_004230	protein_coding	this study	no
DS571181	23064	23758	+	694	EHI_004340	protein_coding	this study	no
DS571181	27301	27381	-	80	EHI_004350	protein_coding	this study	no
DS571181	34091	34095	+	4	EHI_004380	protein_coding	this study	no
DS571181	46790	46924	+	134	EHI_004440	protein_coding	this study	no
DS571181	56652	56654	+	2	EHI_004490	protein_coding	this study	no
DS571181	71009	71016	-	7	EHI_004550	protein_coding	this study	yes
DS571181	76050	76073	+	23	EHI_004580	protein_coding	this study	no
DS571181	78672	78715	+	43	EHI_004590	protein_coding	this study	no
DS571181	81702	81744	+	42	EHI_004600	protein_coding	this study	no
DS571181	88526	88539	+	13	EHI_004640	protein_coding	this study	no
DS571182	2216	2226	-	10	EHI_010255	protein_coding	this study	no
DS571182	3357	3367	+	10	EHI_010260	protein_coding	this study	yes
DS571182	3357	3480	+	123	EHI_010260	protein_coding	this study	yes
DS571182	6007	6032	-	25	EHI_010290	protein_coding	this study	no
DS571182	9908	9926	+	18	EHI_010300	protein_coding	this study	no
DS571182	12574	12622	-	48	EHI_010320	protein_coding	this study	no
DS571182	15126	15127	-	1	EHI_010340	protein_coding	this study	no
DS571182	17578	17585	-	7	EHI_010360	protein_coding	this study	no
DS571182	23989	24017	+	28	EHI_010380	protein_coding	this study	no
DS571182	29803	29815	+	12	EHI_010510	protein_coding	this study	yes
DS571182	31107	31128	-	21	EHI_010530	protein_coding	this study	no
DS571182	33817	33873	+	56	EHI_010540	protein_coding	this study	no
DS571182	47395	47434	-	39	EHI_010600	protein_coding	this study	no
DS571182	64160	64167	+	7	EHI_010660	protein_coding	this study	no
DS571182	68180	68190	-	10	EHI_010690	protein_coding	this study	no
DS571182	74797	74800	+	3	EHI_010720	protein_coding	this study	no
DS571182	76317	76336	+	19	EHI_010730	protein_coding	this study	no
DS571183	7032	7080	+	48	EHI_117820	protein_coding	this study	no
DS571183	10406	10424	+	18	EHI_117850	protein_coding	this study	yes
DS571183	18953	18975	+	22	EHI_117870	protein_coding	this study	no
DS571183	20204	20219	+	15	EHI_117890	protein_coding	this study	no
DS571183	20473	20486	-	13	EHI_117900	protein_coding	this study	no
DS571183	22880	22890	-	10	EHI_117920	protein_coding	this study	yes
DS571183	33619	33640	+	21	EHI_118000	protein_coding	this study	no
DS571183	38527	38531	+	4	EHI_118030	protein_coding	this study	no
DS571183	39441	39463	-	22	EHI_118050	protein_coding	this study	no
DS571183	44140	44154	-	14	EHI_118070	protein_coding	this study	no
DS571183	46613	46633	-	20	EHI_118080	protein_coding	this study	no
DS571183	49792	49796	+	4	EHI_118090	protein_coding	this study	no
DS571183	58069	58088	+	19	EHI_118130	protein_coding	this study	yes
DS571183	59460	59479	-	19	EHI_118140	protein_coding	this study	no
DS571183	60201	60233	-	32	EHI_118150	protein_coding	this study	no
DS571183	60898	60902	-	4	EHI_118160	protein_coding	this study	no
DS571183	62949	62971	-	22	EHI_118170	protein_coding	this study	yes
DS571183	62970	62971	-	1	EHI_118170	protein_coding	this study	yes
DS571183	68526	68538	+	12	EHI_118190	protein_coding	this study	no
DS571183	72839	72847	+	8	EHI_118230	protein_coding	this study	no
DS571184	6390	6408	-	18	EHI_009260	protein_coding	this study	no
DS571184	11575	11609	-	34	EHI_009380	protein_coding	this study	no
DS571184	19024	19025	+	1	EHI_009410	protein_coding	this study	no
DS571184	23170	23183	+	13	EHI_009440	protein_coding	this study	no
DS571184	30889	30943	+	54	EHI_009470	protein_coding	this study	no
DS571184	35101	35109	+	8	EHI_009490	protein_coding	this study	no
DS571184	36116	36122	+	6	EHI_009500	protein_coding	this study	no
DS571184	44725	44731	+	6	EHI_009530	protein_coding	this study	no
DS571184	48582	48606	-	24	EHI_009560	protein_coding	this study	no
DS571184	64988	64995	+	7	EHI_009590	protein_coding	this study	no
DS571184	65062	65078	-	16	EHI_009600	protein_coding	this study	no
DS571184	72650	72671	-	21	EHI_009630	protein_coding	this study	no
DS571185	15404	15466	+	62	EHI_104380	protein_coding	this study	no
DS571185	20116	20162	+	46	EHI_104390	protein_coding	this study	no
DS571185	25179	25203	-	24	EHI_104430	protein_coding	this study	no
DS571185	31318	31392	+	74	EHI_104440	protein_coding	this study	no
DS571185	33187	33206	+	19	EHI_104450	protein_coding	this study	no
DS571185	35547	35595	+	48	EHI_104470	protein_coding	this study	no
DS571185	37291	37354	-	63	EHI_104490	protein_coding	this study	no
DS571185	43329	43336	-	7	EHI_104520	protein_coding	this study	yes
DS571185	61136	61155	-	19	EHI_104600	protein_coding	this study	no
DS571185	63276	63546	-	270	EHI_104620	protein_coding	this study	no
DS571185	65661	65682	-	21	EHI_104630	protein_coding	this study	no
DS571185	77895	77920	-	25	EHI_104710	protein_coding	this study	no
DS571185	85413	85445	-	32	EHI_104740	protein_coding	this study	no
DS571185	88945	88959	-	14	EHI_104770	protein_coding	this study	no
DS571186	2670	2688	+	18	EHI_000240	protein_coding	this study	no
DS571186	3552	3569	+	17	EHI_000250	protein_coding	this study	yes
DS571186	10578	10581	+	3	EHI_000290	protein_coding	this study	no
DS571186	12296	12313	-	17	EHI_000410	protein_coding	this study	no
DS571186	34672	34674	-	2	EHI_000510	protein_coding	this study	yes
DS571186	36987	37049	-	62	EHI_000520	protein_coding	this study	no
DS571186	41744	41745	-	1	EHI_000550	protein_coding	this study	no
DS571186	44548	44567	+	19	EHI_000570	protein_coding	this study	no
DS571186	45527	45533	+	6	EHI_000580	protein_coding	this study	no
DS571186	60766	60782	+	16	EHI_000700	protein_coding	this study	no
DS571186	71600	71645	+	45	EHI_000710	protein_coding	this study	no
DS571186	76203	76231	+	28	EHI_000740	protein_coding	this study	no
DS571186	78905	78914	-	9	EHI_000770	protein_coding	this study	no
DS571186	84956	85020	-	64	EHI_000790	protein_coding	this study	yes
DS571187	20238	20296	+	58	EHI_137700	protein_coding	this study	yes
DS571187	21706	21778	+	72	EHI_137710	protein_coding	this study	no
DS571187	26526	26536	+	10	EHI_137750	protein_coding	this study	no
DS571187	39317	39350	+	33	EHI_137790	protein_coding	this study	no
DS571187	43658	43677	+	19	EHI_137800	protein_coding	this study	no
DS571187	45020	45021	-	1	EHI_137820	protein_coding	this study	no
DS571187	49946	49985	+	39	EHI_137850	protein_coding	this study	no
DS571187	60920	60967	+	47	EHI_137920	protein_coding	this study	no
DS571187	60943	60980	-	37	EHI_137930	protein_coding	this study	no
DS571187	61777	61796	-	19	EHI_137940	protein_coding	this study	no
DS571187	71819	71823	-	4	EHI_137970	protein_coding	this study	yes
DS571187	72723	72771	-	48	EHI_137980	protein_coding	this study	no
DS571187	76398	76437	+	39	EHI_138000	protein_coding	this study	no
DS571187	79723	79741	-	18	EHI_138030	protein_coding	this study	no
DS571187	84110	84180	+	70	EHI_138050	protein_coding	this study	no
DS571187	87215	87221	+	6	EHI_138080	protein_coding	this study	no
DS571188	11272	11300	-	28	EHI_124190	protein_coding	this study	yes
DS571188	11299	11300	-	1	EHI_124190	protein_coding	this study	yes
DS571188	13506	13525	+	19	EHI_124300	protein_coding	this study	no
DS571188	18579	18596	+	17	EHI_124330	protein_coding	this study	no
DS571188	21683	21691	-	8	EHI_124360	protein_coding	this study	no
DS571188	24202	24294	+	92	EHI_124380	protein_coding	this study	no
DS571188	32776	32793	+	17	EHI_124400	protein_coding	this study	no
DS571188	40451	40463	+	12	EHI_124450	protein_coding	this study	no
DS571188	42132	42167	+	35	EHI_124460	protein_coding	this study	no
DS571188	45082	45103	+	21	EHI_124480	protein_coding	this study	no
DS571188	57342	57367	+	25	EHI_124510	protein_coding	this study	no
DS571188	59762	59765	+	3	EHI_124530	protein_coding	this study	no
DS571188	65318	65358	-	40	EHI_124540	protein_coding	this study	no
DS571188	66868	66906	+	38	EHI_124550	protein_coding	this study	no
DS571188	66936	66960	-	24	EHI_124560	protein_coding	this study	no
DS571188	71093	71098	+	5	EHI_124570	protein_coding	this study	no
DS571188	76749	76769	+	20	EHI_124610	protein_coding	this study	yes
DS571188	76749	76814	+	65	EHI_124610	protein_coding	this study	yes
DS571188	76855	76918	-	63	EHI_124620	protein_coding	this study	no
DS571189	26598	26620	+	22	EHI_174670	protein_coding	this study	no
DS571189	32899	32909	+	10	EHI_174880	protein_coding	this study	no
DS571189	32932	32940	-	8	EHI_174890	protein_coding	this study	no
DS571189	35382	35392	-	10	EHI_174910	protein_coding	this study	yes
DS571189	48814	48824	+	10	EHI_174940	protein_coding	this study	no
DS571189	49662	49708	-	46	EHI_174960	protein_coding	this study	no
DS571189	58309	58367	-	58	EHI_175040	protein_coding	this study	no
DS571189	63282	63297	-	15	EHI_175070	protein_coding	this study	no
DS571190	12067	12091	-	24	EHI_038620	protein_coding	this study	no
DS571190	26109	26144	+	35	EHI_038800	protein_coding	this study	no
DS571190	29346	29349	+	3	EHI_038820	protein_coding	this study	yes
DS571190	37343	37345	-	2	EHI_038870	protein_coding	this study	no
DS571190	46728	46758	-	30	EHI_038920	protein_coding	this study	no
DS571190	67579	67640	+	61	EHI_038970	protein_coding	this study	no
DS571190	70313	70358	-	45	EHI_038990	protein_coding	this study	no
DS571190	73310	73334	+	24	EHI_039020	protein_coding	this study	no
DS571190	75284	75295	-	11	EHI_039040	protein_coding	this study	no
DS571190	79428	79434	+	6	EHI_039060	protein_coding	this study	no
DS571190	80711	80739	+	28	EHI_039070	protein_coding	this study	no
DS571191	1714	1726	+	12	EHI_194040	protein_coding	this study	yes
DS571191	3164	3190	-	26	EHI_194050	protein_coding	this study	no
DS571191	11871	11918	+	47	EHI_194180	protein_coding	this study	no
DS571191	12058	12062	-	4	EHI_194190	protein_coding	this study	no
DS571191	14498	14507	+	9	EHI_194200	protein_coding	this study	no
DS571191	15897	16016	-	119	EHI_194220	protein_coding	this study	yes
DS571191	15975	16016	-	41	EHI_194220	protein_coding	this study	yes
DS571191	18853	18863	+	10	EHI_194240	protein_coding	this study	no
DS571191	23134	23141	+	7	EHI_194280	protein_coding	this study	no
DS571191	27116	27140	+	24	EHI_194310	protein_coding	this study	no
DS571191	28262	28335	+	73	EHI_194320	protein_coding	this study	no
DS571191	37089	37097	+	8	EHI_194360	protein_coding	this study	no
DS571191	38088	38112	+	24	EHI_194370	protein_coding	this study	no
DS571191	39414	39426	+	12	EHI_194380	protein_coding	this study	no
DS571191	40489	40493	-	4	EHI_194400	protein_coding	this study	no
DS571191	43142	43179	+	37	EHI_194410	protein_coding	this study	no
DS571191	45087	45105	+	18	EHI_194430	protein_coding	this study	no
DS571191	45915	45926	-	11	EHI_194450	protein_coding	this study	no
DS571191	50106	50135	+	29	EHI_194470	protein_coding	this study	no
DS571191	55285	55300	+	15	EHI_194500	protein_coding	this study	no
DS571191	57247	57269	+	22	EHI_194520	protein_coding	this study	yes
DS571191	62503	64532	+	2029	EHI_194550	protein_coding	this study	no
DS571191	64388	64442	+	54	EHI_194560	protein_coding	this study	no
DS571191	67093	67106	+	13	EHI_194580	protein_coding	this study	no
DS571191	71216	71224	-	8	EHI_194600	protein_coding	this study	no
DS571191	78217	78328	+	111	EHI_194630	protein_coding	this study	no
DS571192	3577	3607	-	30	EHI_065480	protein_coding	this study	no
DS571192	7124	7186	-	62	EHI_065490	protein_coding	this study	no
DS571192	21234	21283	-	49	EHI_065620	protein_coding	this study	no
DS571192	26301	26318	+	17	EHI_065640	protein_coding	this study	no
DS571192	33904	33908	+	4	EHI_065670	protein_coding	this study	no
DS571192	49034	49053	+	19	EHI_065710	protein_coding	this study	no
DS571192	49078	49108	-	30	EHI_065720	protein_coding	this study	no
DS571192	51392	51412	-	20	EHI_065740	protein_coding	this study	no
DS571192	59108	59141	-	33	EHI_065780	protein_coding	this study	no
DS571192	62517	62529	+	12	EHI_065810	protein_coding	this study	no
DS571192	64622	64641	+	19	EHI_065830	protein_coding	this study	no
DS571192	64704	64728	-	24	EHI_065840	protein_coding	this study	no
DS571192	68620	68642	+	22	EHI_065850	protein_coding	this study	no
DS571192	69301	69305	-	4	EHI_065860	protein_coding	this study	no
DS571192	78810	78818	+	8	EHI_065890	protein_coding	this study	no
DS571193	23049	23065	-	16	EHI_134480	protein_coding	this study	no
DS571193	24274	24281	-	7	EHI_134490	protein_coding	this study	no
DS571193	41890	41957	+	67	EHI_134660	protein_coding	this study	no
DS571193	51695	51702	-	7	EHI_134720	protein_coding	this study	no
DS571193	54921	54937	+	16	EHI_134740	protein_coding	this study	no
DS571193	59330	59381	+	51	EHI_134750	protein_coding	this study	no
DS571193	65395	65422	-	27	EHI_134800	protein_coding	this study	no
DS571193	67361	67379	-	18	EHI_134820	protein_coding	this study	no
DS571193	74539	74544	+	5	EHI_134840	protein_coding	this study	no
DS571194	3436	3437	+	1	EHI_021200	protein_coding	this study	yes
DS571194	3436	3462	+	26	EHI_021200	protein_coding	this study	yes
DS571194	16827	16848	-	21	EHI_021270	protein_coding	this study	no
DS571194	26222	26224	-	2	EHI_021300	protein_coding	this study	no
DS571194	37892	37924	+	32	EHI_021340	protein_coding	this study	no
DS571194	49890	49911	-	21	EHI_021410	protein_coding	this study	no
DS571194	53089	53099	-	10	EHI_021440	protein_coding	this study	no
DS571194	55176	55196	+	20	EHI_021450	protein_coding	this study	no
DS571194	73963	73986	+	23	EHI_021560	protein_coding	this study	yes
DS571195	10664	10723	-	59	EHI_004750	protein_coding	this study	no
DS571195	16254	16300	+	46	EHI_004780	protein_coding	this study	no
DS571195	17661	17702	-	41	EHI_004800	protein_coding	this study	no
DS571195	17663	17686	+	23	EHI_004790	protein_coding	this study	no
DS571195	18648	18676	-	28	EHI_004810	protein_coding	this study	no
DS571195	19465	19487	-	22	EHI_004820	protein_coding	this study	no
DS571195	25383	25409	-	26	EHI_004840	protein_coding	this study	no
DS571195	25401	25410	+	9	EHI_004830	protein_coding	this study	no
DS571195	27049	27066	+	17	EHI_004850	protein_coding	this study	no
DS571195	29494	29532	+	38	EHI_004860	protein_coding	this study	no
DS571195	32123	32151	+	28	EHI_004870	protein_coding	this study	no
DS571195	41899	41955	-	56	EHI_004940	protein_coding	this study	no
DS571195	44753	44778	+	25	EHI_004960	protein_coding	this study	no
DS571195	47136	47144	+	8	EHI_004980	protein_coding	this study	no
DS571195	59643	59647	-	4	EHI_005070	protein_coding	this study	no
DS571195	67570	67580	-	10	EHI_005130	protein_coding	this study	no
DS571195	71129	71174	+	45	EHI_005140	protein_coding	this study	no
DS571195	73983	74005	+	22	EHI_005150	protein_coding	this study	no
DS571196	38379	38387	+	8	EHI_064510	protein_coding	this study	no
DS571196	39333	39343	-	10	EHI_064530	protein_coding	this study	no
DS571196	40925	40965	-	40	EHI_064540	protein_coding	this study	no
DS571196	54239	54266	-	27	EHI_064620	protein_coding	this study	no
DS571196	59255	59271	+	16	EHI_064640	protein_coding	this study	no
DS571196	62514	62549	+	35	EHI_064660	protein_coding	this study	no
DS571196	64455	64478	+	23	EHI_064680	protein_coding	this study	no
DS571196	72935	72956	+	21	EHI_064710	protein_coding	this study	no
DS571197	2657	2662	-	5	EHI_006550	protein_coding	this study	no
DS571197	14936	14955	+	19	EHI_006700	protein_coding	this study	no
DS571197	15068	15090	-	22	EHI_006710	protein_coding	this study	no
DS571197	21664	21666	+	2	EHI_006740	protein_coding	this study	no
DS571197	24854	24869	+	15	EHI_006750	protein_coding	this study	no
DS571197	33517	33565	-	48	EHI_006820	protein_coding	this study	no
DS571197	36316	36386	-	70	EHI_006840	protein_coding	this study	no
DS571197	36326	36351	+	25	EHI_006830	protein_coding	this study	no
DS571197	44680	44698	-	18	EHI_006880	protein_coding	this study	no
DS571197	45370	45443	-	73	EHI_006885	protein_coding	this study	yes
DS571197	45399	45443	-	44	EHI_006885	protein_coding	this study	yes
DS571197	48596	48600	-	4	EHI_006910	protein_coding	this study	no
DS571197	50947	51089	+	142	EHI_006920	protein_coding	this study	no
DS571197	55391	55398	-	7	EHI_006960	protein_coding	this study	no
DS571197	63852	63886	-	34	EHI_007000	protein_coding	this study	no
DS571197	69498	69505	-	7	EHI_007020	protein_coding	this study	no
DS571198	1615	1626	+	11	EHI_024220	protein_coding	this study	no
DS571198	1681	1695	-	14	EHI_024230	protein_coding	this study	no
DS571198	8639	8674	+	35	EHI_024350	protein_coding	this study	no
DS571198	10146	10165	-	19	EHI_024380	protein_coding	this study	no
DS571198	13520	13564	-	44	EHI_024400	protein_coding	this study	no
DS571198	20436	20453	+	17	EHI_024420	protein_coding	this study	no
DS571198	40873	40927	-	54	EHI_024530	protein_coding	this study	no
DS571198	49020	49036	+	16	EHI_024560	protein_coding	this study	no
DS571198	58284	58302	+	18	EHI_024590	protein_coding	this study	no
DS571198	58967	58996	-	29	EHI_024610	protein_coding	this study	no
DS571198	65767	65769	-	2	EHI_024640	protein_coding	this study	no
DS571198	72793	72866	+	73	EHI_024680	protein_coding	this study	yes
DS571198	73744	73762	+	18	EHI_024690	protein_coding	this study	no
DS571199	9791	9829	+	38	EHI_008370	protein_coding	this study	no
DS571199	12396	12408	+	12	EHI_008380	protein_coding	this study	no
DS571199	13316	13322	-	6	EHI_008390	protein_coding	this study	no
DS571199	19965	20155	+	190	EHI_008420	protein_coding	this study	no
DS571199	25144	25182	+	38	EHI_008450	protein_coding	this study	no
DS571199	33137	33149	-	12	EHI_008610	protein_coding	this study	yes
DS571199	38665	38678	+	13	EHI_008630	protein_coding	this study	no
DS571199	41874	41913	-	39	EHI_008650	protein_coding	this study	no
DS571199	66993	67007	-	14	EHI_008780	protein_coding	this study	no
DS571199	70435	70439	-	4	EHI_008790	protein_coding	this study	no
DS571200	12012	12031	+	19	EHI_009830	protein_coding	this study	no
DS571200	13950	13970	+	20	EHI_009850	protein_coding	this study	no
DS571200	22942	22978	-	36	EHI_009900	protein_coding	this study	no
DS571200	41384	41408	-	24	EHI_009990	protein_coding	this study	no
DS571200	46226	46247	+	21	EHI_010020	protein_coding	this study	yes
DS571200	46268	46286	-	18	EHI_010030	protein_coding	this study	no
DS571200	51513	51550	-	37	EHI_010060	protein_coding	this study	yes
DS571200	51534	51550	-	16	EHI_010060	protein_coding	this study	yes
DS571201	3911	3918	+	7	EHI_100080	protein_coding	this study	no
DS571201	6658	6677	-	19	EHI_100110	protein_coding	this study	yes
DS571201	10440	10531	-	91	EHI_100140	protein_coding	this study	no
DS571201	21853	21861	-	8	EHI_100280	protein_coding	this study	no
DS571201	23831	23851	-	20	EHI_100290	protein_coding	this study	no
DS571201	57325	57338	+	13	EHI_100410	protein_coding	this study	no
DS571201	63596	63660	-	64	EHI_100460	protein_coding	this study	no
DS571201	68396	68425	+	29	EHI_100480	protein_coding	this study	no
DS571202	15634	15649	+	15	EHI_015230	protein_coding	this study	no
DS571202	30172	30192	-	20	EHI_015300	protein_coding	this study	no
DS571202	38315	38333	+	18	EHI_015360	protein_coding	this study	no
DS571202	42891	42920	-	29	EHI_015380	protein_coding	this study	no
DS571202	61144	61155	+	11	EHI_015420	protein_coding	this study	no
DS571203	4837	4838	-	1	EHI_134950	protein_coding	this study	no
DS571203	6464	6466	-	2	EHI_134960	protein_coding	this study	no
DS571203	9267	9307	-	40	EHI_134980	protein_coding	this study	no
DS571203	16220	16268	-	48	EHI_135000	protein_coding	this study	no
DS571203	38100	38117	+	17	EHI_135100	protein_coding	this study	no
DS571203	46143	46171	+	28	EHI_135140	protein_coding	this study	no
DS571203	48690	48697	+	7	EHI_135150	protein_coding	this study	no
DS571203	50552	50567	+	15	EHI_135160	protein_coding	this study	no
DS571204	8095	8097	-	2	EHI_104940	protein_coding	this study	no
DS571204	12878	12904	+	26	EHI_105060	protein_coding	this study	no
DS571204	16391	16465	+	74	EHI_105070	protein_coding	this study	no
DS571204	16998	17017	-	19	EHI_105080	protein_coding	this study	no
DS571204	22398	22420	+	22	EHI_105110	protein_coding	this study	no
DS571204	28214	28230	-	16	EHI_105170	protein_coding	this study	no
DS571204	33354	33385	-	31	EHI_105210	protein_coding	this study	no
DS571204	34510	34551	-	41	EHI_105220	protein_coding	this study	no
DS571204	45970	45996	+	26	EHI_105270	protein_coding	this study	no
DS571204	55179	55248	+	69	EHI_105340	protein_coding	this study	no
DS571205	28997	29032	+	35	EHI_107100	protein_coding	this study	no
DS571205	55598	55617	+	19	EHI_107240	protein_coding	this study	no
DS571205	58829	58831	+	2	EHI_107270	protein_coding	this study	no
DS571205	61672	61696	+	24	EHI_107280	protein_coding	this study	no
DS571205	62456	62460	-	4	EHI_107290	protein_coding	this study	yes
DS571205	65024	65030	+	6	EHI_107300	protein_coding	this study	no
DS571205	66188	66225	+	37	EHI_107310	protein_coding	this study	no
DS571205	66379	66400	-	21	EHI_107320	protein_coding	this study	no
DS571205	70198	70252	+	54	EHI_107330	protein_coding	this study	no
DS571206	19706	19712	-	6	EHI_188070	protein_coding	this study	no
DS571206	28370	28382	-	12	EHI_188110	protein_coding	this study	no
DS571206	32040	32084	+	44	EHI_188120	protein_coding	this study	no
DS571206	33096	33169	+	73	EHI_188130	protein_coding	this study	no
DS571206	52670	52739	-	69	EHI_188220	protein_coding	this study	yes
DS571206	52692	52739	-	47	EHI_188220	protein_coding	this study	yes
DS571206	61036	61047	+	11	EHI_188260	protein_coding	this study	yes
[truncated: 1,203 more rows]

## Sheet: N. gruberi 3'UTR annotation
chrom	3'utr_start	3'utr_end	strand	3'utr_length	gene_id	description	source	alternative_polyadentlation
NAEGRscaffold_1	719114	719325	+	211	NAEGRDRAFT_77754	CTD phosphatase	ena	no
NAEGRscaffold_1	139695	139710	+	15	NAEGRDRAFT_56417	hypothetical protein	ena	no
NAEGRscaffold_1	359968	360051	-	83	NAEGRDRAFT_34608	serine/threonine kinase	ena	yes
NAEGRscaffold_1	747900	747963	+	63	NAEGRDRAFT_34693	fumarate hydratase class I	ena	no
NAEGRscaffold_1	978784	978811	+	27	NAEGRDRAFT_56516	calpain family cysteine protease	ena	no
NAEGRscaffold_1	980036	980059	-	23	NAEGRDRAFT_55563	predicted protein	ena	no
NAEGRscaffold_1	1029827	1029845	+	18	NAEGRDRAFT_56526	hypothetical protein	ena	no
NAEGRscaffold_1	334648	334668	-	20	NAEGRDRAFT_77701	hypothetical protein	ena	no
NAEGRscaffold_1	53472	53506	+	34	NAEGRDRAFT_77664	ran-binding protein 21	ena	no
NAEGRscaffold_1	463328	463373	-	45	NAEGRDRAFT_34629	predicted protein	ena	no
NAEGRscaffold_1	1443905	1443998	-	93	NAEGRDRAFT_77842	ras family small GTPase	ena	no
NAEGRscaffold_1	1491875	1491927	+	52	NAEGRDRAFT_77850	50S ribosomal protein L3	ena	no
NAEGRscaffold_1	681891	681929	-	38	NAEGRDRAFT_34674	inosine-5-monophosphate dehydrogenase	ena	no
NAEGRscaffold_1	404592	404613	+	21	NAEGRDRAFT_77711	predicted protein	ena	no
NAEGRscaffold_1	535684	535700	-	16	NAEGRDRAFT_56467	prohibitin	ena	no
NAEGRscaffold_1	1297370	1297502	-	132	NAEGRDRAFT_77829	RRM motif-containing protein	ena	no
NAEGRscaffold_1	1021125	1021199	+	74	NAEGRDRAFT_77797	hypothetical protein	ena	no
NAEGRscaffold_1	1365173	1365189	-	16	NAEGRDRAFT_77836	seryl-tRNA synthetase	ena	no
NAEGRscaffold_1	1135937	1136405	+	468	NAEGRDRAFT_56534	predicted protein	ena	no
NAEGRscaffold_1	1004869	1005075	+	206	NAEGRDRAFT_77794	hypothetical protein	ena	no
NAEGRscaffold_1	690723	690752	-	29	NAEGRDRAFT_77748	nucleolar complex protein 2	ena	no
NAEGRscaffold_1	194083	194118	+	35	NAEGRDRAFT_77682	TPR repeat protein	ena	no
NAEGRscaffold_1	750340	750361	-	21	NAEGRDRAFT_37208	4-aminobutyrate aminotransferase	ena	no
NAEGRscaffold_1	1431823	1431904	+	81	NAEGRDRAFT_77841	mitochondrial import inner membrane translocase subunit tim-16	ena	no
NAEGRscaffold_1	248716	248730	-	14	NAEGRDRAFT_37097	adenylosuccinate synthetase	ena	no
NAEGRscaffold_1	1161587	1161664	+	77	NAEGRDRAFT_77814	glycoside hydrolase	ena	no
NAEGRscaffold_1	372731	372962	-	231	NAEGRDRAFT_77707	hypothetical protein	ena	no
NAEGRscaffold_1	1337667	1337719	-	52	NAEGRDRAFT_77832	hypothetical protein	ena	no
NAEGRscaffold_1	577135	577168	-	33	NAEGRDRAFT_34667	predicted protein	ena	no
NAEGRscaffold_1	883899	883922	+	23	NAEGRDRAFT_34718	hydroxymethyltransferase	ena	no
NAEGRscaffold_1	583931	583943	-	12	NAEGRDRAFT_77742	nuclear transport receptor exportin 4 protein	ena	no
NAEGRscaffold_1	1181478	1181501	+	23	NAEGRDRAFT_77816	C-5 sterol desaturase	ena	no
NAEGRscaffold_1	1456247	1456292	+	45	NAEGRDRAFT_34790	predicted protein	ena	no
NAEGRscaffold_1	580858	580895	-	37	NAEGRDRAFT_56474	transcription initiation factor TFIID component TAF4	ena	no
NAEGRscaffold_1	1142149	1142171	+	22	NAEGRDRAFT_77811	predicted protein	ena	no
NAEGRscaffold_1	1494094	1494166	+	72	NAEGRDRAFT_55569	ras family small GTPase (RAP-1)	ena	no
NAEGRscaffold_1	795966	795995	-	29	NAEGRDRAFT_77765	NADPH-cytochrome P450 oxidoreductase	ena	no
NAEGRscaffold_1	459266	459288	+	22	NAEGRDRAFT_34624	exportin-7	ena	no
NAEGRscaffold_1	478741	478750	+	9	NAEGRDRAFT_56460	rap/ran GTPase-activating protein	ena	no
NAEGRscaffold_1	895763	895872	-	109	NAEGRDRAFT_77778	hydroxymethylglutaryl coenzyme A synthase	ena	no
NAEGRscaffold_1	1552563	1552581	+	18	NAEGRDRAFT_77856	DNA-directed RNA polymerase III RPC4, polypeptide D	ena	no
NAEGRscaffold_1	500253	500279	+	26	NAEGRDRAFT_37149	predicted protein	ena	no
NAEGRscaffold_1	347330	347352	+	22	NAEGRDRAFT_34601	metalloprotease	ena	no
NAEGRscaffold_1	985927	986714	-	787	NAEGRDRAFT_77790	N-acetylglucosamine-1-phosphate transferase	ena	no
NAEGRscaffold_1	1492785	1492802	+	17	NAEGRDRAFT_82883	N-acetyltransferase 5	ena	no
NAEGRscaffold_1	567095	567133	+	38	NAEGRDRAFT_77738	hypothetical protein	ena	no
NAEGRscaffold_1	1459780	1459859	-	79	NAEGRDRAFT_77848	exocyst complex component 7	ena	no
NAEGRscaffold_1	841989	842014	-	25	NAEGRDRAFT_77771	predicted protein	ena	no
NAEGRscaffold_1	709845	709892	+	47	NAEGRDRAFT_56484	predicted protein	ena	no
NAEGRscaffold_1	1345731	1345765	+	34	NAEGRDRAFT_77833	cyclin-dependent protein kinase	ena	no
NAEGRscaffold_1	1285413	1285415	+	2	NAEGRDRAFT_77826	rhoGEF domain-containing protein	ena	no
NAEGRscaffold_1	715774	715873	+	99	NAEGRDRAFT_77752	histidine kinase	ena	no
NAEGRscaffold_1	720405	720460	+	55	NAEGRDRAFT_77755	ARF/SAR family small GTPase	ena	yes
NAEGRscaffold_1	720405	720460	+	55	NAEGRDRAFT_77755	ARF/SAR family small GTPase	ena	yes
NAEGRscaffold_1	170306	170376	-	70	NAEGRDRAFT_77678	hypothetical protein	ena	no
NAEGRscaffold_1	1163283	1163338	+	55	NAEGRDRAFT_77815	WD40 repeat domain-containing protein	ena	no
NAEGRscaffold_1	998194	998212	-	18	NAEGRDRAFT_56521	predicted protein	ena	no
NAEGRscaffold_1	1290162	1290188	-	26	NAEGRDRAFT_77827	rabGTPase-activating protein	ena	no
NAEGRscaffold_1	1146378	1146398	+	20	NAEGRDRAFT_77812	mitochondrial inner membrane protein 1	ena	no
NAEGRscaffold_1	105891	105925	+	34	NAEGRDRAFT_77167	20S proteasome	ena	no
NAEGRscaffold_1	439386	439411	+	25	NAEGRDRAFT_77715	hypothetical protein	ena	no
NAEGRscaffold_1	829039	829069	-	30	NAEGRDRAFT_77770	predicted protein	ena	no
NAEGRscaffold_1	669023	669039	+	16	NAEGRDRAFT_77745	hypothetical protein	ena	no
NAEGRscaffold_1	391186	391200	-	14	NAEGRDRAFT_77710	hypothetical protein	ena	no
NAEGRscaffold_1	960153	960471	+	318	NAEGRDRAFT_56515	hypothetical protein	ena	no
NAEGRscaffold_1	211386	211419	+	33	NAEGRDRAFT_56427	WD40 repeat domain-containing protein	ena	no
NAEGRscaffold_1	1296446	1296515	-	69	NAEGRDRAFT_56551	hypothetical protein	ena	no
NAEGRscaffold_1	1303301	1303444	-	143	NAEGRDRAFT_77830	arfGTPase-activating protein	ena	yes
NAEGRscaffold_1	1060677	1060700	+	23	NAEGRDRAFT_77803	ATP-dependent dead box RNA helicase	ena	no
NAEGRscaffold_1	1359441	1359639	-	198	NAEGRDRAFT_77835	exonuclease family protein	ena	no
NAEGRscaffold_1	993250	993393	-	143	NAEGRDRAFT_56519	predicted protein	ena	no
NAEGRscaffold_1	997296	997361	+	65	NAEGRDRAFT_88226	hypothetical protein	ena	no
NAEGRscaffold_1	472453	472535	-	82	NAEGRDRAFT_77721	hypothetical protein	ena	no
NAEGRscaffold_1	1200726	1200739	+	13	NAEGRDRAFT_77822	hypothetical protein	ena	no
NAEGRscaffold_1	356154	356174	-	20	NAEGRDRAFT_77704	exosome complex exonuclease RRP44	ena	no
NAEGRscaffold_1	296517	296537	-	20	NAEGRDRAFT_77695	brix domain-containing protein	ena	no
NAEGRscaffold_1	939830	939839	+	9	NAEGRDRAFT_77784	SEC1 family transport protein	ena	no
NAEGRscaffold_1	189004	189004	-	0	NAEGRDRAFT_77681	phosphatidylinositol-4-phosphate 5-kinase	ena	no
NAEGRscaffold_1	859587	859616	+	29	NAEGRDRAFT_77772	predicted protein	ena	no
NAEGRscaffold_1	479320	479446	+	126	NAEGRDRAFT_77723	predicted protein	ena	yes
NAEGRscaffold_1	205609	205667	-	58	NAEGRDRAFT_55960	ribosomal protein S5	ena	no
NAEGRscaffold_1	272682	272701	-	19	NAEGRDRAFT_77692	predicted protein	ena	no
NAEGRscaffold_1	66297	66339	+	42	NAEGRDRAFT_82851	hypothetical protein	ena	no
NAEGRscaffold_1	1334688	1334825	-	137	NAEGRDRAFT_77831	RGS-domain-containing protein	ena	no
NAEGRscaffold_1	1183706	1183740	+	34	NAEGRDRAFT_77817	hypothetical protein	ena	no
NAEGRscaffold_1	558015	558055	+	40	NAEGRDRAFT_77736	polysaccharide biosynthesis protein	ena	no
NAEGRscaffold_1	784872	784927	-	55	NAEGRDRAFT_77763	hypothetical protein	ena	no
NAEGRscaffold_1	1191983	1192186	+	203	NAEGRDRAFT_77820	hypothetical protein	ena	no
NAEGRscaffold_1	420545	420566	-	21	NAEGRDRAFT_56451	hypothetical protein	ena	no
NAEGRscaffold_1	1450173	1450207	-	34	NAEGRDRAFT_77844	predicted protein	ena	no
NAEGRscaffold_1	1195363	1195376	-	13	NAEGRDRAFT_56544	phosphorylated carboxy-terminal domain interacting factor	ena	no
NAEGRscaffold_1	1456312	1456474	-	162	NAEGRDRAFT_34795	thioredoxin	ena	no
NAEGRscaffold_1	17593	17693	-	100	NAEGRDRAFT_82392	hypothetical protein	ena	yes
NAEGRscaffold_1	731461	731508	-	47	NAEGRDRAFT_77756	myosin	ena	no
NAEGRscaffold_1	118502	118529	+	27	NAEGRDRAFT_56416	vacuolar protein sorting	ena	no
NAEGRscaffold_1	245508	245516	+	8	NAEGRDRAFT_56431	RRP5 protein	ena	no
NAEGRscaffold_1	83728	83767	-	39	NAEGRDRAFT_82397	predicted protein	ena	no
NAEGRscaffold_1	594283	594909	+	626	NAEGRDRAFT_37179	U5 snRNP-specific spliceosomal protein	ena	no
NAEGRscaffold_1	794848	794883	-	35	NAEGRDRAFT_82870	NADH-cytochrome b5 reductase	ena	no
NAEGRscaffold_1	224376	224411	-	35	NAEGRDRAFT_77687	hypothetical protein	ena	no
NAEGRscaffold_1	1119072	1119156	+	84	NAEGRDRAFT_55970	rab family small GTPase	ena	no
NAEGRscaffold_1	382948	382978	+	30	NAEGRDRAFT_77708	calponin homology domain-containing protein	ena	no
NAEGRscaffold_1	487430	487455	-	25	NAEGRDRAFT_55553	betaine aldehyde dehydrogenase	ena	no
NAEGRscaffold_1	550700	550763	+	63	NAEGRDRAFT_77734	hypothetical protein	ena	no
NAEGRscaffold_1	29970	30307	-	337	NAEGRDRAFT_77164	rho family small GTPase	ena	no
NAEGRscaffold_1	1207200	1207416	+	216	NAEGRDRAFT_77823	hypothetical protein	ena	no
NAEGRscaffold_1	780706	780724	-	18	NAEGRDRAFT_77762	large subunit GTPase 1	ena	no
NAEGRscaffold_1	931592	931767	+	175	NAEGRDRAFT_77781	predicted protein	ena	no
NAEGRscaffold_1	895163	895211	+	48	NAEGRDRAFT_34723	5-methyltetrahydrofolate-homocysteine methyltransferase	ena	no
NAEGRscaffold_1	1494204	1494222	-	18	NAEGRDRAFT_56571	membrane-attack complex/perforin domain-containing protein	ena	no
NAEGRscaffold_1	935621	935689	+	68	NAEGRDRAFT_77782	hypothetical protein	ena	no
NAEGRscaffold_1	546698	546751	+	53	NAEGRDRAFT_77733	dynamin	ena	no
NAEGRscaffold_1	871807	871831	-	24	NAEGRDRAFT_77774	mannose-p-dolichol utilization defect 1 protein	ena	no
NAEGRscaffold_1	1054105	1054210	+	105	NAEGRDRAFT_55063	predicted protein	ena	no
NAEGRscaffold_1	214802	214879	+	77	NAEGRDRAFT_77686	TPR domain-containing protein	ena	no
NAEGRscaffold_1	342167	342271	+	104	NAEGRDRAFT_55551	proteasome subunit alpha type 5	ena	no
NAEGRscaffold_1	518431	518491	-	60	NAEGRDRAFT_34642	predicted protein	ena	yes
NAEGRscaffold_1	250262	250337	-	75	NAEGRDRAFT_77691	hypothetical protein	ena	no
NAEGRscaffold_1	154948	155038	+	90	NAEGRDRAFT_56420	hypothetical protein	ena	no
NAEGRscaffold_1	525073	525118	+	45	NAEGRDRAFT_55554	predicted protein	ena	no
NAEGRscaffold_1	331160	331201	+	41	NAEGRDRAFT_77700	transcription initiation factor IIF, beta subunit	ena	no
NAEGRscaffold_1	907467	907649	-	182	NAEGRDRAFT_77779	hypothetical protein	ena	no
NAEGRscaffold_1	1506469	1506487	-	18	NAEGRDRAFT_77855	ubiquinone biosynthesis hydroxylase	ena	no
NAEGRscaffold_1	200306	200349	+	43	NAEGRDRAFT_77683	cation-transporting ATPase	ena	no
NAEGRscaffold_1	450601	450630	-	29	NAEGRDRAFT_77717	hypothetical protein	ena	no
NAEGRscaffold_1	555892	555910	+	18	NAEGRDRAFT_77735	predicted protein	ena	no
NAEGRscaffold_1	1418241	1418256	+	15	NAEGRDRAFT_77840	hypothetical protein	ena	no
NAEGRscaffold_1	320839	320853	+	14	NAEGRDRAFT_56438	predicted protein	ena	no
NAEGRscaffold_1	1259640	1259716	-	76	NAEGRDRAFT_77825	predicted protein	ena	no
NAEGRscaffold_1	506634	506662	+	28	NAEGRDRAFT_56462	RmlC-like cupin family protein	ena	no
NAEGRscaffold_1	1183716	1183875	-	159	NAEGRDRAFT_56541	hypothetical protein	ena	yes
NAEGRscaffold_1	292998	293038	+	40	NAEGRDRAFT_77694	GTPase obg	ena	no
NAEGRscaffold_1	1349765	1349808	+	43	NAEGRDRAFT_77834	hypothetical protein	ena	no
NAEGRscaffold_1	571717	571732	-	15	NAEGRDRAFT_37170	predicted protein	ena	no
NAEGRscaffold_1	862485	862499	+	14	NAEGRDRAFT_77773	hypothetical protein	ena	no
NAEGRscaffold_1	951439	951443	-	4	NAEGRDRAFT_77785	GAL4 domain-containing protein	ena	no
NAEGRscaffold_1	1006586	1007160	-	574	NAEGRDRAFT_55564	flagellar calmodulin	ena	yes
NAEGRscaffold_1	562683	562697	-	14	NAEGRDRAFT_77737	dead box RNA helicase	ena	no
NAEGRscaffold_1	516745	516820	+	75	NAEGRDRAFT_34640	soluble inorganic pyrophosphatase	ena	no
NAEGRscaffold_1	162341	162899	-	558	NAEGRDRAFT_77677	predicted protein	ena	no
NAEGRscaffold_1	1064816	1064920	-	104	NAEGRDRAFT_77804	hypothetical protein	ena	no
NAEGRscaffold_1	1100979	1101004	-	25	NAEGRDRAFT_77806	mitogen-activated protein kinase phosphatase	ena	no
NAEGRscaffold_1	176630	176661	-	31	NAEGRDRAFT_77679	serine/threonine kinase	ena	no
NAEGRscaffold_1	1069008	1069064	+	56	NAEGRDRAFT_82879	aspartate aminotransferase	ena	no
NAEGRscaffold_1	756383	756424	+	41	NAEGRDRAFT_77760	predicted protein	ena	no
NAEGRscaffold_1	763432	763459	+	27	NAEGRDRAFT_37210	MRP-like mind family ATPase	ena	no
NAEGRscaffold_1	1045720	1045765	-	45	NAEGRDRAFT_77800	dynamin family GTPase	ena	no
NAEGRscaffold_1	34592	34775	+	183	NAEGRDRAFT_77663	hypothetical protein	ena	no
NAEGRscaffold_1	1370015	1370017	-	2	NAEGRDRAFT_56558	predicted protein	ena	no
NAEGRscaffold_1	702774	702793	+	19	NAEGRDRAFT_56483	predicted protein	ena	no
NAEGRscaffold_1	981213	981236	-	23	NAEGRDRAFT_34736	hypothetical protein	ena	no
NAEGRscaffold_1	468905	468931	+	26	NAEGRDRAFT_34632	methylmalonyl-CoA mutase	ena	no
NAEGRscaffold_1	935739	936449	-	710	NAEGRDRAFT_34729	hypothetical protein	ena	no
NAEGRscaffold_1	813228	813251	-	23	NAEGRDRAFT_77769	crooked neck protein	ena	no
NAEGRscaffold_1	70397	70426	+	29	NAEGRDRAFT_77666	eukaryotic translation initiation factor 3 subunit	ena	no
NAEGRscaffold_1	1114368	1114387	+	19	NAEGRDRAFT_82880	cell division cycle protein 27	ena	no
NAEGRscaffold_1	90366	90383	-	17	NAEGRDRAFT_77668	hypothetical protein	ena	no
NAEGRscaffold_1	1221674	1221714	-	40	NAEGRDRAFT_34775	pyridoxine kinase	ena	no
NAEGRscaffold_1	1137745	1137778	-	33	NAEGRDRAFT_77810	hypothetical protein	ena	no
NAEGRscaffold_1	575223	575241	-	18	NAEGRDRAFT_77740	HMG-box domain-containing protein	ena	no
NAEGRscaffold_1	430823	430851	-	28	NAEGRDRAFT_77714	ribosome biogenesis protein bop1	ena	no
NAEGRscaffold_2	415311	415449	+	138	NAEGRDRAFT_77904	hypothetical protein	ena	no
NAEGRscaffold_2	536611	536638	-	27	NAEGRDRAFT_77918	BRCT domain-containing protein	ena	no
NAEGRscaffold_2	75724	75757	+	33	NAEGRDRAFT_56584	predicted protein	ena	no
NAEGRscaffold_2	696703	696729	-	26	NAEGRDRAFT_77942	nucleoporin 107	ena	no
NAEGRscaffold_2	813040	813059	-	19	NAEGRDRAFT_77960	small subunit ribosomal protein S18	ena	no
NAEGRscaffold_2	69216	69246	-	30	NAEGRDRAFT_56583	predicted protein	ena	no
NAEGRscaffold_2	891519	891550	-	31	NAEGRDRAFT_56672	predicted protein	ena	no
NAEGRscaffold_2	236355	236386	-	31	NAEGRDRAFT_77887	NPL4 family protein	ena	no
NAEGRscaffold_2	876411	876700	+	289	NAEGRDRAFT_77975	predicted protein	ena	no
NAEGRscaffold_2	749612	749657	-	45	NAEGRDRAFT_77947	pleckstrin-like domain-containing protein	ena	no
NAEGRscaffold_2	342271	342282	-	11	NAEGRDRAFT_77897	cytochrome c	ena	no
NAEGRscaffold_2	402628	402733	-	105	NAEGRDRAFT_77903	differentiation-specific protein 35-2	ena	no
NAEGRscaffold_2	14015	14039	-	24	NAEGRDRAFT_77860	RhoGEF domain-containing protein	ena	no
NAEGRscaffold_2	880885	880943	-	58	NAEGRDRAFT_77977	N-acyl-phosphatidylethanolamine-hydrolyzing phospholipase D-like protein	ena	no
NAEGRscaffold_2	530892	530911	-	19	NAEGRDRAFT_77915	type-B response regulator	ena	no
NAEGRscaffold_2	729498	729556	-	58	NAEGRDRAFT_77946	SWI/SNF-related matrix-associated actin-dependent regulator of chromatin subfamily D	ena	no
NAEGRscaffold_2	240128	240153	+	25	NAEGRDRAFT_77888	hypothetical protein	ena	no
NAEGRscaffold_2	432005	432044	+	39	NAEGRDRAFT_56613	predicted protein	ena	no
NAEGRscaffold_2	375326	375349	-	23	NAEGRDRAFT_77900	hypothetical protein	ena	no
NAEGRscaffold_2	844623	845070	+	447	NAEGRDRAFT_34932	O-methyltransferase	ena	yes
NAEGRscaffold_2	885942	886037	+	95	NAEGRDRAFT_77978	predicted protein	ena	no
NAEGRscaffold_2	560258	560276	-	18	NAEGRDRAFT_77924	fumarylacetoacetate hydrolase	ena	no
NAEGRscaffold_2	622307	622453	-	146	NAEGRDRAFT_77928	rho family small GTPase	ena	no
NAEGRscaffold_2	451124	451156	+	32	NAEGRDRAFT_77908	acid phosphatase	ena	no
NAEGRscaffold_2	68971	68984	+	13	NAEGRDRAFT_77868	exocyst complex component Sec3	ena	no
NAEGRscaffold_2	244196	244927	-	731	NAEGRDRAFT_34842	protein kinase	ena	no
NAEGRscaffold_2	360467	360508	-	41	NAEGRDRAFT_77899	splicing factor 3b, subunit 2	ena	no
NAEGRscaffold_2	777457	777493	+	36	NAEGRDRAFT_77952	predicted protein	ena	no
NAEGRscaffold_2	54965	54989	-	24	NAEGRDRAFT_56581	predicted protein	ena	no
NAEGRscaffold_2	101769	101889	-	120	NAEGRDRAFT_56585	cell division control protein 2	ena	no
NAEGRscaffold_2	215922	215940	-	18	NAEGRDRAFT_77883	hypothetical protein	ena	no
NAEGRscaffold_2	920782	920837	-	55	NAEGRDRAFT_34946	spermidine synthase	ena	no
NAEGRscaffold_2	199793	199817	-	24	NAEGRDRAFT_77882	ATP-dependent RNA helicase	ena	no
NAEGRscaffold_2	997230	997247	+	17	NAEGRDRAFT_77994	hypothetical protein	ena	no
NAEGRscaffold_2	842851	842870	+	19	NAEGRDRAFT_77967	hypothetical protein	ena	no
NAEGRscaffold_2	535244	535261	-	17	NAEGRDRAFT_77917	predicted protein	ena	no
NAEGRscaffold_2	270503	270506	-	3	NAEGRDRAFT_77891	ATP-dependent RNA helicase	ena	no
NAEGRscaffold_2	166398	166557	-	159	NAEGRDRAFT_56592	hypothetical protein	ena	yes
NAEGRscaffold_2	555066	555082	+	16	NAEGRDRAFT_77921	SAC9 protein-like protein	ena	no
NAEGRscaffold_2	629608	629650	-	42	NAEGRDRAFT_56631	vacuolar protein sorting protein	ena	no
NAEGRscaffold_2	603201	603225	-	24	NAEGRDRAFT_77926	predicted protein	ena	no
NAEGRscaffold_2	441587	441605	-	18	NAEGRDRAFT_77906	ubiquitin-specific processing protease	ena	no
NAEGRscaffold_2	938439	938545	-	106	NAEGRDRAFT_77987	leucine rich repeat family protein	ena	no
NAEGRscaffold_2	671338	671367	-	29	NAEGRDRAFT_77939	hypothetical protein	ena	no
NAEGRscaffold_2	926312	926326	+	14	NAEGRDRAFT_77984	N-acetylglucosaminylaminotransferase	ena	no
NAEGRscaffold_2	141291	141315	-	24	NAEGRDRAFT_77875	predicted protein	ena	no
NAEGRscaffold_2	462165	462199	-	34	NAEGRDRAFT_77910	hypothetical protein	ena	no
NAEGRscaffold_2	862560	862601	+	41	NAEGRDRAFT_77972	hypothetical protein	ena	no
NAEGRscaffold_2	161768	161800	-	32	NAEGRDRAFT_77878	meiotic cell division protein pelota	ena	no
NAEGRscaffold_2	284597	284637	+	40	NAEGRDRAFT_77893	peroxisomal biogenesis aaa ATPase Pex1	ena	no
NAEGRscaffold_2	751251	751281	-	30	NAEGRDRAFT_77948	serine/threonine-protein kinase	ena	no
NAEGRscaffold_2	581081	581128	-	47	NAEGRDRAFT_34873	profilin	ena	no
NAEGRscaffold_2	814419	814457	-	38	NAEGRDRAFT_77961	predicted protein	ena	no
NAEGRscaffold_2	3405	3445	-	40	NAEGRDRAFT_77858	FtsX domain-containing protein	ena	no
NAEGRscaffold_2	176102	176300	+	198	NAEGRDRAFT_77880	hypothetical protein	ena	no
NAEGRscaffold_2	965202	965219	+	17	NAEGRDRAFT_77990	hypothetical protein	ena	no
NAEGRscaffold_2	465508	465588	-	80	NAEGRDRAFT_77911	DUF894 domain-containing protein	ena	no
NAEGRscaffold_2	222391	222392	+	1	NAEGRDRAFT_77884	transcription initiation factor IIE beta subunit	ena	no
NAEGRscaffold_2	387798	387879	-	81	NAEGRDRAFT_77902	hypothetical protein	ena	no
NAEGRscaffold_2	229575	229595	+	20	NAEGRDRAFT_56599	hypothetical protein	ena	no
NAEGRscaffold_2	45285	45350	-	65	NAEGRDRAFT_77865	predicted protein	ena	no
NAEGRscaffold_2	784691	784721	-	30	NAEGRDRAFT_82897	predicted protein	ena	no
NAEGRscaffold_2	286520	286800	+	280	NAEGRDRAFT_55972	CKS domain-containing protein	ena	no
NAEGRscaffold_2	557840	558581	-	741	NAEGRDRAFT_77923	hypothetical protein	ena	no
NAEGRscaffold_2	26651	26716	-	65	NAEGRDRAFT_77863	RNA recognition motif-containing protein	ena	no
NAEGRscaffold_2	694739	694769	-	30	NAEGRDRAFT_34898	5'-nucleotidase	ena	no
NAEGRscaffold_2	155207	155214	+	7	NAEGRDRAFT_77877	glyceronephosphate O-acyltransferase	ena	no
NAEGRscaffold_2	1241	1253	-	12	NAEGRDRAFT_77857	short chain dehydrogenase/reductase family protein	ena	no
NAEGRscaffold_2	837193	837319	+	126	NAEGRDRAFT_77965	YEATS domain-containing protein	ena	no
NAEGRscaffold_2	861630	861769	+	139	NAEGRDRAFT_77971	hypothetical protein	ena	no
NAEGRscaffold_2	799604	799682	-	78	NAEGRDRAFT_77955	NADPH:adrenodoxin oxidoreductase mitochondrial precursor	ena	no
NAEGRscaffold_2	865856	865868	-	12	NAEGRDRAFT_77973	bromodomain-containing protein	ena	no
NAEGRscaffold_2	664360	664459	-	99	NAEGRDRAFT_77938	predicted protein	ena	no
NAEGRscaffold_2	662090	662277	-	187	NAEGRDRAFT_34892	predicted protein	ena	no
NAEGRscaffold_2	833034	833123	-	89	NAEGRDRAFT_77963	DUF862/DUF1000 domain-containing protein	ena	no
NAEGRscaffold_2	804361	804373	+	12	NAEGRDRAFT_77957	proliferating-cell nucleolar antigen p120	ena	no
NAEGRscaffold_2	545180	545264	-	84	NAEGRDRAFT_77920	phenylalanine 4-monooxygenase	ena	no
NAEGRscaffold_2	987274	987312	+	38	NAEGRDRAFT_77992	hypothetical protein	ena	no
NAEGRscaffold_2	994207	994227	-	20	NAEGRDRAFT_77993	GTP-binding protein	ena	no
NAEGRscaffold_2	343409	343596	-	187	NAEGRDRAFT_77898	PI-PLC-X domain-containing protein	ena	no
NAEGRscaffold_2	903200	903217	-	17	NAEGRDRAFT_55990	predicted protein	ena	no
NAEGRscaffold_2	241551	241744	-	193	NAEGRDRAFT_82890	casein kinase I epsilon	ena	no
NAEGRscaffold_2	829641	829756	-	115	NAEGRDRAFT_56657	predicted protein	ena	no
NAEGRscaffold_2	713586	713608	-	22	NAEGRDRAFT_77945	hypothetical protein	ena	no
NAEGRscaffold_2	661939	662112	+	173	NAEGRDRAFT_77936	histone H3 variant	ena	no
NAEGRscaffold_2	187401	187417	+	16	NAEGRDRAFT_37337	hypothetical protein	ena	no
NAEGRscaffold_2	704773	704777	-	4	NAEGRDRAFT_77944	PPR repeat domain-containing protein	ena	no
NAEGRscaffold_2	133875	133896	+	21	NAEGRDRAFT_77873	GAL4-domain-containing protein	ena	no
NAEGRscaffold_2	930906	930915	+	9	NAEGRDRAFT_77985	peptidase A22B family protein	ena	no
NAEGRscaffold_2	148995	149009	-	14	NAEGRDRAFT_77876	ste20-like protein kinase	ena	no
NAEGRscaffold_2	24133	24295	-	162	NAEGRDRAFT_77862	cell division cycle protein 48	ena	no
NAEGRscaffold_2	657210	657382	+	172	NAEGRDRAFT_34884	splicing factor 3a, subunit 2	ena	no
NAEGRscaffold_2	888863	888896	-	33	NAEGRDRAFT_82427	predicted protein	ena	no
NAEGRscaffold_2	809633	809656	-	23	NAEGRDRAFT_77959	Octicosapeptide/Phox/Bem1p domain-containing protein	ena	no
NAEGRscaffold_2	141048	141139	+	91	NAEGRDRAFT_77874	predicted protein	ena	yes
NAEGRscaffold_2	796695	796706	+	11	NAEGRDRAFT_77954	hypothetical protein	ena	no
NAEGRscaffold_2	535206	535240	+	34	NAEGRDRAFT_77916	hypothetical protein	ena	no
NAEGRscaffold_2	629376	629418	+	42	NAEGRDRAFT_77930	UBCc domain-containing protein	ena	no
NAEGRscaffold_2	940492	940511	-	19	NAEGRDRAFT_34959	hypothetical protein	ena	no
NAEGRscaffold_2	661065	661092	+	27	NAEGRDRAFT_56635	hypothetical protein	ena	no
NAEGRscaffold_2	539963	539984	-	21	NAEGRDRAFT_56624	predicted protein	ena	no
NAEGRscaffold_2	766788	766803	-	15	NAEGRDRAFT_34909	3'-5' exoribonuclease/RNA-binding protein-like protein	ena	no
NAEGRscaffold_2	840688	840716	+	28	NAEGRDRAFT_82900	predicted protein	ena	no
NAEGRscaffold_2	471219	471264	+	45	NAEGRDRAFT_77912	hypothetical protein	ena	no
NAEGRscaffold_2	381664	381849	+	185	NAEGRDRAFT_56610	hypothetical protein	ena	no
NAEGRscaffold_3	598826	598863	-	37	NAEGRDRAFT_78066	Poly(A)-binding protein binding protein	ena	no
NAEGRscaffold_3	26728	26764	-	36	NAEGRDRAFT_77998	hypothetical protein	ena	no
NAEGRscaffold_3	923325	923341	+	16	NAEGRDRAFT_82920	solute carrier family 30 protein	ena	no
NAEGRscaffold_3	884775	884795	+	20	NAEGRDRAFT_78116	hypothetical protein	ena	no
NAEGRscaffold_3	800876	800955	-	79	NAEGRDRAFT_78099	hypothetical protein	ena	no
NAEGRscaffold_3	136834	136880	-	46	NAEGRDRAFT_78012	iron-sulfur cluster-binding protein, Rieske family	ena	no
NAEGRscaffold_3	719687	719687	+	0	NAEGRDRAFT_56751	predicted protein	ena	no
NAEGRscaffold_3	844178	844246	+	68	NAEGRDRAFT_78106	hypothetical protein	ena	no
NAEGRscaffold_3	848106	848306	+	200	NAEGRDRAFT_78107	MRP-type abc transporter	ena	no
NAEGRscaffold_3	119112	119133	-	21	NAEGRDRAFT_34972	tryptophanyl-tRNA synthetase	ena	no
NAEGRscaffold_3	587312	587415	-	103	NAEGRDRAFT_35037	20S proteasome, A and B subunits	ena	no
NAEGRscaffold_3	718459	718485	+	26	NAEGRDRAFT_78081	predicted protein	ena	no
NAEGRscaffold_3	12327	12346	-	19	NAEGRDRAFT_77995	hypothetical protein	ena	no
NAEGRscaffold_3	336059	336082	+	23	NAEGRDRAFT_78037	hypothetical protein	ena	no
NAEGRscaffold_3	896840	896877	+	37	NAEGRDRAFT_78118	hypothetical protein	ena	no
NAEGRscaffold_3	685150	685260	-	110	NAEGRDRAFT_78076	predicted protein	ena	yes
NAEGRscaffold_3	723924	723963	+	39	NAEGRDRAFT_78083	zinc finger, C2H2 type family protein	ena	no
NAEGRscaffold_3	589638	589655	+	17	NAEGRDRAFT_78064	predicted protein	ena	no
NAEGRscaffold_3	763076	763289	-	213	NAEGRDRAFT_78090	COG4642 domain-containing protein	ena	no
NAEGRscaffold_3	809805	809825	+	20	NAEGRDRAFT_78100	CAP_ED domain-containing protein	ena	no
NAEGRscaffold_3	90694	90779	+	85	NAEGRDRAFT_78004	hypothetical protein	ena	no
NAEGRscaffold_3	793692	793693	-	1	NAEGRDRAFT_78098	hypothetical protein	ena	no
NAEGRscaffold_3	285133	285152	-	19	NAEGRDRAFT_78029	hypothetical protein	ena	no
NAEGRscaffold_3	523508	523616	+	108	NAEGRDRAFT_35035	predicted protein	ena	yes
NAEGRscaffold_3	538995	539024	+	29	NAEGRDRAFT_78058	ankyrin repeat domain-containing protein	ena	no
NAEGRscaffold_3	884890	884938	-	48	NAEGRDRAFT_56774	hypothetical protein	ena	no
NAEGRscaffold_3	131789	131834	-	45	NAEGRDRAFT_78011	hypothetical protein	ena	no
NAEGRscaffold_3	56241	56341	+	100	NAEGRDRAFT_78003	ubox domain-containing protein	ena	no
NAEGRscaffold_3	234623	234752	-	129	NAEGRDRAFT_78019	thiamine-phosphate pyrophosphorylase	ena	no
NAEGRscaffold_3	254361	254374	-	13	NAEGRDRAFT_78023	cytochrome P450	ena	no
NAEGRscaffold_3	907927	908080	+	153	NAEGRDRAFT_78119	hypothetical protein	ena	no
NAEGRscaffold_3	607583	607608	-	25	NAEGRDRAFT_78068	DNA mismatch repair protein msh6	ena	no
NAEGRscaffold_3	150698	150721	-	23	NAEGRDRAFT_56698	phospholipid-translocating P-type ATPase	ena	no
NAEGRscaffold_3	113249	113471	+	222	NAEGRDRAFT_56693	F-box and leucine-rich repeat protein	ena	no
NAEGRscaffold_3	933243	933293	+	50	NAEGRDRAFT_55094	hypothetical protein	ena	no
NAEGRscaffold_3	666767	666778	+	11	NAEGRDRAFT_78074	neuroblastoma-amplified protein-like protein	ena	no
NAEGRscaffold_3	727602	727702	-	100	NAEGRDRAFT_37563	ran family small GTPase	ena	no
NAEGRscaffold_3	793610	793663	+	53	NAEGRDRAFT_78097	rad23 protein	ena	yes
NAEGRscaffold_3	409929	410170	-	241	NAEGRDRAFT_78045	hypothetical protein	ena	no
NAEGRscaffold_3	580684	581040	-	356	NAEGRDRAFT_78062	hypothetical protein	ena	no
NAEGRscaffold_3	20161	20190	+	29	NAEGRDRAFT_56684	rho GTPase activating protein	ena	no
NAEGRscaffold_3	774418	774435	-	17	NAEGRDRAFT_56760	splicing factor Prp8	ena	no
NAEGRscaffold_3	443394	443407	+	13	NAEGRDRAFT_78048	amino acid transport protein	ena	no
NAEGRscaffold_3	758793	758862	+	69	NAEGRDRAFT_78087	hypothetical protein	ena	no
NAEGRscaffold_3	123710	123754	-	44	NAEGRDRAFT_78009	RNA binding domain-containing protein	ena	no
NAEGRscaffold_3	265863	265877	+	14	NAEGRDRAFT_55992	amine oxidase:FAD dependent oxidoreductase	ena	no
NAEGRscaffold_3	556276	556295	-	19	NAEGRDRAFT_78060	abc transporter, white family	ena	no
NAEGRscaffold_3	816833	816854	-	21	NAEGRDRAFT_82919	cysteinyl-tRNA synthetase	ena	no
NAEGRscaffold_3	426115	426233	+	118	NAEGRDRAFT_35022	predicted protein	ena	no
NAEGRscaffold_3	506033	506066	-	33	NAEGRDRAFT_78055	predicted protein	ena	no
NAEGRscaffold_3	468729	468788	-	59	NAEGRDRAFT_56722	predicted protein	ena	no
NAEGRscaffold_3	913527	913543	+	16	NAEGRDRAFT_78120	myosin	ena	no
NAEGRscaffold_3	377490	377520	-	30	NAEGRDRAFT_78042	mitochondrial aconitate hydratase	ena	no
NAEGRscaffold_3	326349	326500	+	151	NAEGRDRAFT_78034	hypothetical protein	ena	no
NAEGRscaffold_3	929951	930044	+	93	NAEGRDRAFT_78124	fumarylacetoacetate hydrolase	ena	yes
NAEGRscaffold_3	380131	380155	-	24	NAEGRDRAFT_78043	hypothetical protein	ena	no
NAEGRscaffold_3	376880	376903	+	23	NAEGRDRAFT_35014	predicted protein	ena	no
NAEGRscaffold_3	695945	696031	+	86	NAEGRDRAFT_82916	serine C-palmitoyltransferase	ena	no
NAEGRscaffold_3	921657	921680	+	23	NAEGRDRAFT_78122	serine/threonine-protein kinase	ena	no
NAEGRscaffold_3	126757	126786	+	29	NAEGRDRAFT_56696	hypothetical protein	ena	no
NAEGRscaffold_3	51647	51760	-	113	NAEGRDRAFT_56687	DUF849 domain-containing protein	ena	no
NAEGRscaffold_3	761263	761278	-	15	NAEGRDRAFT_78089	hypothetical protein	ena	no
NAEGRscaffold_3	812678	812706	+	28	NAEGRDRAFT_55998	Appr-1-p domain-containing protein	ena	no
NAEGRscaffold_3	622185	622343	-	158	NAEGRDRAFT_78070	hypothetical protein	ena	no
NAEGRscaffold_3	861189	861215	-	26	NAEGRDRAFT_37577	cathepsin C	ena	no
NAEGRscaffold_3	913982	914000	-	18	NAEGRDRAFT_78121	Rieske non-heme iron oxygenase family protein	ena	no
NAEGRscaffold_3	304239	304244	-	5	NAEGRDRAFT_78033	ubiquitin-conjugating enzyme family protein	ena	no
NAEGRscaffold_3	810696	810733	-	37	NAEGRDRAFT_56763	myb, DNA-binding protein	ena	no
NAEGRscaffold_3	230867	231118	-	251	NAEGRDRAFT_78018	eukaryotic translation initiation factor 4E	ena	no
NAEGRscaffold_3	872273	872316	+	43	NAEGRDRAFT_78113	hypothetical protein	ena	no
NAEGRscaffold_3	38410	38474	+	64	NAEGRDRAFT_56686	predicted protein	ena	no
NAEGRscaffold_3	160207	160342	+	135	NAEGRDRAFT_78015	hypothetical protein	ena	no
NAEGRscaffold_3	504148	504205	+	57	NAEGRDRAFT_78054	FYVE finger-containing phosphoinositide kinase	ena	no
NAEGRscaffold_3	654765	654781	-	16	NAEGRDRAFT_56743	predicted protein	ena	no
NAEGRscaffold_3	714474	714505	+	31	NAEGRDRAFT_78079	serine/threonine-protein kinase	ena	no
NAEGRscaffold_3	478056	478309	-	253	NAEGRDRAFT_56723	predicted protein	ena	yes
NAEGRscaffold_3	771405	771417	-	12	NAEGRDRAFT_78093	hypothetical protein	ena	no
NAEGRscaffold_3	852245	852263	-	18	NAEGRDRAFT_78109	peptidyl-prolyl cis-trans isomerase	ena	no
NAEGRscaffold_3	752091	752128	-	37	NAEGRDRAFT_77207	Aha1 domain-containing protein	ena	no
NAEGRscaffold_3	519660	519770	+	110	NAEGRDRAFT_78056	WD40 repeat domain-containing protein	ena	no
NAEGRscaffold_3	654209	654796	+	587	NAEGRDRAFT_78072	condensin subunit SMC1	ena	no
NAEGRscaffold_3	826670	826670	+	0	NAEGRDRAFT_56766	calponin homology domain protein	ena	yes
NAEGRscaffold_3	14860	15586	+	726	NAEGRDRAFT_82906	methionine sulfoxide reductase A	ena	yes
NAEGRscaffold_3	365313	365372	-	59	NAEGRDRAFT_78039	homeodomain-containing protein	ena	no
NAEGRscaffold_3	164291	164308	-	17	NAEGRDRAFT_78017	intron-binding protein aquarius	ena	no
NAEGRscaffold_3	298004	298137	-	133	NAEGRDRAFT_35000	histone H3	ena	no
NAEGRscaffold_3	289805	290270	-	465	NAEGRDRAFT_34997	glutamyl-tRNA amidotransferase	ena	no
NAEGRscaffold_3	602897	602936	-	39	NAEGRDRAFT_56737	hypothetical protein	ena	no
NAEGRscaffold_3	689491	689523	-	32	NAEGRDRAFT_37549	mitochondrial sulfite oxidase	ena	no
NAEGRscaffold_3	589631	589638	-	7	NAEGRDRAFT_56734	Cwf15/Cwc15 cell cycle control protein	ena	no
NAEGRscaffold_3	45931	45949	+	18	NAEGRDRAFT_78000	hypothetical protein	ena	no
NAEGRscaffold_3	54531	54648	+	117	NAEGRDRAFT_78002	hypothetical protein	ena	no
NAEGRscaffold_3	245229	245301	-	72	NAEGRDRAFT_34984	DNA mismatch repair protein muts	ena	no
NAEGRscaffold_3	261686	261796	+	110	NAEGRDRAFT_78024	hypothetical protein	ena	no
NAEGRscaffold_3	816511	816659	+	148	NAEGRDRAFT_78103	ARF/SAR family small GTPase	ena	no
NAEGRscaffold_3	768173	768264	+	91	NAEGRDRAFT_78091	single-stranded DNA-binding replication protein A large subunit	ena	no
NAEGRscaffold_3	275236	275263	-	27	NAEGRDRAFT_34993	asparagine synthetase	ena	no
NAEGRscaffold_3	791398	792037	+	639	NAEGRDRAFT_78096	EF-hand domain-containing protein	ena	no
NAEGRscaffold_3	862915	863155	-	240	NAEGRDRAFT_78112	hypothetical protein	ena	no
NAEGRscaffold_3	95214	96455	-	1241	NAEGRDRAFT_78006	outward-rectifier potassium channel	ena	no
NAEGRscaffold_3	447208	447246	+	38	NAEGRDRAFT_35026	predicted protein	ena	no
NAEGRscaffold_3	734520	734600	+	80	NAEGRDRAFT_56754	hypothetical protein	ena	no
NAEGRscaffold_3	841157	841211	+	54	NAEGRDRAFT_78105	TPR repeat domain protein	ena	no
NAEGRscaffold_3	634815	634832	-	17	NAEGRDRAFT_78071	kinesin-14	ena	no
NAEGRscaffold_3	281688	281810	+	122	NAEGRDRAFT_78028	hypothetical protein	ena	no
NAEGRscaffold_3	760051	760143	-	92	NAEGRDRAFT_78088	predicted protein	ena	no
NAEGRscaffold_3	593129	593155	+	26	NAEGRDRAFT_78065	S-adenosylmethionine-dependent methyltransferase	ena	no
NAEGRscaffold_3	270892	271073	-	181	NAEGRDRAFT_78026	hypothetical protein	ena	no
NAEGRscaffold_8	622831	622847	+	16	NAEGRDRAFT_78605	RNA polymerase II elongator complex subunit	ena	no
NAEGRscaffold_8	777739	777760	-	21	NAEGRDRAFT_35609	predicted protein	ena	no
NAEGRscaffold_8	160387	160499	+	112	NAEGRDRAFT_78574	nucleosome assembly family protein	ena	no
NAEGRscaffold_8	604649	604775	-	126	NAEGRDRAFT_35568	mitochondrial chaperonin cpn60	ena	no
NAEGRscaffold_8	62804	62856	+	52	NAEGRDRAFT_78562	von Willebrand factor type A domain-containing protein	ena	no
NAEGRscaffold_8	894941	894972	+	31	NAEGRDRAFT_78652	stomatin-like protein	ena	no
NAEGRscaffold_8	613672	613688	-	16	NAEGRDRAFT_78603	leucine rich repeat protein	ena	no
NAEGRscaffold_8	652798	652860	-	62	NAEGRDRAFT_57153	hypothetical protein	ena	no
NAEGRscaffold_8	87227	87244	-	17	NAEGRDRAFT_78565	rhoGEF domain-containing protein	ena	no
NAEGRscaffold_8	731510	731542	+	32	NAEGRDRAFT_78626	DEAD/DEAH box helicase	ena	no
NAEGRscaffold_8	842006	842048	-	42	NAEGRDRAFT_78643	vacuolar ATP synthase subunit H	ena	no
NAEGRscaffold_8	141801	141822	-	21	NAEGRDRAFT_57132	hypothetical protein	ena	no
NAEGRscaffold_8	861562	861592	+	30	NAEGRDRAFT_78645	hypothetical protein	ena	no
NAEGRscaffold_8	198873	199014	-	141	NAEGRDRAFT_78581	hypothetical protein	ena	no
NAEGRscaffold_8	675662	675694	+	32	NAEGRDRAFT_78612	transketolase	ena	no
NAEGRscaffold_8	884139	884173	+	34	NAEGRDRAFT_57186	RasGEF domain-containing protein	ena	no
NAEGRscaffold_8	201540	201551	+	11	NAEGRDRAFT_78582	hypothetical protein	ena	no
NAEGRscaffold_8	289595	289644	-	49	NAEGRDRAFT_78595	hypothetical protein	ena	no
NAEGRscaffold_8	175066	175080	+	14	NAEGRDRAFT_78577	TPR repeat protein	ena	no
NAEGRscaffold_8	788946	788993	+	47	NAEGRDRAFT_82995	metallo-beta-lactamase family protein	ena	no
NAEGRscaffold_8	837999	838022	+	23	NAEGRDRAFT_78642	U3 snoRNP protein	ena	no
NAEGRscaffold_8	711232	711262	-	30	NAEGRDRAFT_78621	ubiquitin specific hydrolase	ena	no
NAEGRscaffold_8	201552	201575	-	23	NAEGRDRAFT_78583	protein phosphatase 2C	ena	no
NAEGRscaffold_8	763102	763124	+	22	NAEGRDRAFT_78630	hypothetical protein	ena	no
NAEGRscaffold_8	710470	710499	+	29	NAEGRDRAFT_78620	hypothetical protein	ena	no
NAEGRscaffold_8	167255	167473	-	218	NAEGRDRAFT_78576	thermonuclease	ena	no
NAEGRscaffold_8	799399	799424	+	25	NAEGRDRAFT_57175	WD repeat domain 24	ena	no
NAEGRscaffold_8	13280	13317	+	37	NAEGRDRAFT_78554	ankyrin repeat domain-containing protein	ena	no
NAEGRscaffold_8	679039	679911	-	872	NAEGRDRAFT_77260	WD40 repeat domain-containing protein	ena	yes
NAEGRscaffold_8	819341	819349	-	8	NAEGRDRAFT_78640	ATP dependent RNA helicase	ena	no
NAEGRscaffold_8	23865	24537	+	672	NAEGRDRAFT_78556	hypothetical protein	ena	no
NAEGRscaffold_8	176747	176772	-	25	NAEGRDRAFT_38032	predicted protein	ena	no
NAEGRscaffold_8	866627	866644	+	17	NAEGRDRAFT_57183	predicted protein	ena	no
NAEGRscaffold_8	640397	640420	+	23	NAEGRDRAFT_78607	hypothetical protein	ena	no
NAEGRscaffold_8	661797	661948	-	151	NAEGRDRAFT_57154	brix domain-containing protein	ena	no
NAEGRscaffold_8	875884	875907	-	23	NAEGRDRAFT_35633	aldehyde dehydrogenase	ena	no
NAEGRscaffold_8	265306	265355	-	49	NAEGRDRAFT_78591	serine/threonine kinase	ena	no
NAEGRscaffold_8	13442	13519	-	77	NAEGRDRAFT_35518	myosin	ena	no
NAEGRscaffold_8	770307	770371	+	64	NAEGRDRAFT_78632	gamma-glutamyl transpeptidase	ena	no
NAEGRscaffold_8	881035	881110	+	75	NAEGRDRAFT_82996	predicted protein	ena	no
NAEGRscaffold_8	572358	572374	+	16	NAEGRDRAFT_78598	hypothetical protein	ena	no
NAEGRscaffold_8	716436	717008	-	572	NAEGRDRAFT_35594	GDP-mannose 4,6 dehydratase	ena	yes
NAEGRscaffold_8	766120	766267	-	147	NAEGRDRAFT_78631	hypothetical protein	ena	no
NAEGRscaffold_8	191063	191114	-	51	NAEGRDRAFT_35538	thioredoxin	ena	no
NAEGRscaffold_8	564757	564784	-	27	NAEGRDRAFT_78596	hypothetical protein	ena	no
NAEGRscaffold_8	214838	214957	-	119	NAEGRDRAFT_77259	malate dehydrogenase	ena	no
NAEGRscaffold_8	677720	677735	-	15	NAEGRDRAFT_35578	predicted protein	ena	no
NAEGRscaffold_8	159478	159502	+	24	NAEGRDRAFT_57133	predicted protein	ena	no
NAEGRscaffold_8	777725	777739	+	14	NAEGRDRAFT_57172	hypothetical protein	ena	no
NAEGRscaffold_8	96483	96635	-	152	NAEGRDRAFT_78566	DUF605 domain-containing protein	ena	no
NAEGRscaffold_8	793775	793810	-	35	NAEGRDRAFT_78637	hypothetical protein	ena	no
NAEGRscaffold_8	103847	103887	-	40	NAEGRDRAFT_78567	hypothetical protein	ena	no
NAEGRscaffold_8	51982	52011	+	29	NAEGRDRAFT_78560	C2 domain-containing protein	ena	no
NAEGRscaffold_8	163028	163049	-	21	NAEGRDRAFT_78575	DUF6 domain-containing protein	ena	yes
NAEGRscaffold_8	745908	745922	-	14	NAEGRDRAFT_78628	hypothetical protein	ena	no
NAEGRscaffold_8	851066	851094	+	28	NAEGRDRAFT_78644	molecular chaperone heat shock protein GrpE	ena	no
NAEGRscaffold_8	891877	891954	-	77	NAEGRDRAFT_57187	dTDP-glucose 4,6-dehydratase	ena	no
NAEGRscaffold_8	677726	677740	+	14	NAEGRDRAFT_78613	predicted protein	ena	no
NAEGRscaffold_8	753240	753268	+	28	NAEGRDRAFT_78629	basic leucine zipper domain-containing protein	ena	no
NAEGRscaffold_8	628502	628577	+	75	NAEGRDRAFT_57151	DUF1212 domain-containing protein	ena	no
NAEGRscaffold_8	720063	720089	-	26	NAEGRDRAFT_78625	beta-ketoacyl synthase	ena	no
NAEGRscaffold_8	581370	581463	-	93	NAEGRDRAFT_78599	dead box helicase protein	ena	no
NAEGRscaffold_8	668225	668272	-	47	NAEGRDRAFT_78611	predicted protein	ena	no
NAEGRscaffold_8	716271	716338	+	67	NAEGRDRAFT_35589	histone deacetylase	ena	yes
NAEGRscaffold_8	781276	781559	-	283	NAEGRDRAFT_78635	hypothetical protein	ena	no
NAEGRscaffold_8	176737	176766	+	29	NAEGRDRAFT_78578	predicted protein	ena	no
NAEGRscaffold_8	59129	59157	+	28	NAEGRDRAFT_78561	homeobox protein PKNOX1-like protein	ena	no
NAEGRscaffold_8	222598	222844	-	246	NAEGRDRAFT_78588	DUF791 domain-containing protein	ena	no
NAEGRscaffold_8	151234	151344	-	110	NAEGRDRAFT_78572	hypothetical protein	ena	no
NAEGRscaffold_8	217524	217563	+	39	NAEGRDRAFT_38043	protein-s isoprenylsysteine O-methyltransferase	ena	no
NAEGRscaffold_8	117738	117784	+	46	NAEGRDRAFT_38025	D-lactate dehydrogenase	ena	no
NAEGRscaffold_8	129472	129502	+	30	NAEGRDRAFT_78570	NPK1-related protein kinase	ena	no
NAEGRscaffold_8	868139	868173	+	34	NAEGRDRAFT_57184	TPR domain-containing protein	ena	no
NAEGRscaffold_8	705289	705308	-	19	NAEGRDRAFT_78619	TPR repeat protein	ena	no
NAEGRscaffold_8	278402	278489	+	87	NAEGRDRAFT_78593	hypothetical protein	ena	no
NAEGRscaffold_8	251921	251942	+	21	NAEGRDRAFT_57142	predicted protein	ena	no
NAEGRscaffold_8	597290	597314	-	24	NAEGRDRAFT_57147	lipase	ena	no
NAEGRscaffold_8	568217	568329	+	112	NAEGRDRAFT_78597	hypothetical protein	ena	no
NAEGRscaffold_8	618901	618920	+	19	NAEGRDRAFT_78604	hypothetical protein	ena	no
NAEGRscaffold_8	74394	76180	-	1786	NAEGRDRAFT_57125	predicted protein	ena	yes
NAEGRscaffold_8	41373	41395	+	22	NAEGRDRAFT_78559	hypothetical protein	ena	no
NAEGRscaffold_8	264398	264427	-	29	NAEGRDRAFT_35558	predicted protein	ena	no
NAEGRscaffold_8	642937	642953	-	16	NAEGRDRAFT_78608	tubulin binding cofactor C	ena	no
NAEGRscaffold_8	830652	830654	-	2	NAEGRDRAFT_38119	long chain fatty acid CoA ligase	ena	no
NAEGRscaffold_8	28343	28407	+	64	NAEGRDRAFT_78558	dihydrolipoamide acyltransferase	ena	no
NAEGRscaffold_8	139496	139557	+	61	NAEGRDRAFT_57131	tripeptidyl peptidase	ena	no
NAEGRscaffold_8	592230	592267	-	37	NAEGRDRAFT_57146	RNA polymerase III transcription factor TFIIIC subunit	ena	no
NAEGRscaffold_5	11789	11984	-	195	NAEGRDRAFT_78229	G-protein alpha subunit	ena	no
NAEGRscaffold_5	619574	619661	-	87	NAEGRDRAFT_78309	predicted protein	ena	no
NAEGRscaffold_5	98021	98068	+	47	NAEGRDRAFT_78243	squalene monooxygenase	ena	no
NAEGRscaffold_5	424933	424960	-	27	NAEGRDRAFT_82455	predicted protein	ena	no
NAEGRscaffold_5	38600	38621	+	21	NAEGRDRAFT_78233	hypothetical protein	ena	no
NAEGRscaffold_5	775416	775482	-	66	NAEGRDRAFT_37816	Glu/Leu/Phe/Val dehydrogenase	ena	yes
NAEGRscaffold_5	585793	585854	+	61	NAEGRDRAFT_78302	DEP domain-containing protein	ena	no
NAEGRscaffold_5	804615	804652	+	37	NAEGRDRAFT_78343	prohibitin domain-containing protein	ena	no
NAEGRscaffold_5	21514	21550	-	36	NAEGRDRAFT_78230	WD-40 repeat-containing protein	ena	no
NAEGRscaffold_5	824920	825148	-	228	NAEGRDRAFT_78347	hypothetical protein	ena	no
NAEGRscaffold_5	622954	623209	-	255	NAEGRDRAFT_78311	probable extracellular nuclease	ena	no
NAEGRscaffold_5	387819	387921	-	102	NAEGRDRAFT_78270	voltage gated chloride channel	ena	no
NAEGRscaffold_5	614384	614437	+	53	NAEGRDRAFT_78308	hypothetical protein	ena	no
NAEGRscaffold_5	400209	400244	+	35	NAEGRDRAFT_78273	60S acidic ribosomal protein P1	ena	no
NAEGRscaffold_5	540132	540198	-	66	NAEGRDRAFT_82457	3-ketoacyl-CoA thiolase	ena	no
NAEGRscaffold_5	648212	648229	-	17	NAEGRDRAFT_56935	Hypothetical protein	ena	no
NAEGRscaffold_5	565964	566068	-	104	NAEGRDRAFT_78300	aquaporin	ena	no
NAEGRscaffold_5	667055	667065	+	10	NAEGRDRAFT_35288	predicted protein	ena	no
NAEGRscaffold_5	205377	205399	-	22	NAEGRDRAFT_78262	TPR repeat domain protein	ena	no
NAEGRscaffold_5	523072	523116	+	44	NAEGRDRAFT_56920	hypothetical protein	ena	yes
NAEGRscaffold_5	176819	177403	+	584	NAEGRDRAFT_78254	hypothetical protein	ena	no
NAEGRscaffold_5	380847	380847	-	0	NAEGRDRAFT_78267	Hypothetical protein	ena	no
NAEGRscaffold_5	434378	434402	+	24	NAEGRDRAFT_56909	hypothetical protein	ena	no
NAEGRscaffold_5	390657	390684	-	27	NAEGRDRAFT_77227	acid phosphatase	ena	no
NAEGRscaffold_5	406022	406077	-	55	NAEGRDRAFT_56904	aminoglycoside phosphotransferase	ena	no
NAEGRscaffold_5	27420	27436	+	16	NAEGRDRAFT_56867	ubiquitin fusion degradation protein domain-containing protein	ena	no
NAEGRscaffold_5	400420	400471	-	51	NAEGRDRAFT_82942	damage-specific DNA binding protein 1	ena	no
NAEGRscaffold_5	585835	585852	-	17	NAEGRDRAFT_78303	ubiquitin specific protease	ena	no
NAEGRscaffold_5	64013	64044	-	31	NAEGRDRAFT_82937	elongation factor 2	ena	no
NAEGRscaffold_5	181727	181749	-	22	NAEGRDRAFT_78257	Hypothetical protein	ena	no
NAEGRscaffold_5	126983	127025	+	42	NAEGRDRAFT_56883	hypothetical protein	ena	no
NAEGRscaffold_5	822351	822417	-	66	NAEGRDRAFT_78346	transcriptional repressor TUP1	ena	no
NAEGRscaffold_5	227859	227997	-	138	NAEGRDRAFT_78266	tyrosine kinase	ena	no
NAEGRscaffold_5	395064	395188	+	124	NAEGRDRAFT_78272	nitrate reductase	ena	no
NAEGRscaffold_5	727413	727880	-	467	NAEGRDRAFT_78331	rho family small GTPase	ena	no
NAEGRscaffold_5	53711	53823	+	112	NAEGRDRAFT_78234	mitochondrial tRNA modification GTPase	ena	no
NAEGRscaffold_5	717281	717295	+	14	NAEGRDRAFT_78329	Hypothetical protein	ena	no
NAEGRscaffold_5	508305	508363	+	58	NAEGRDRAFT_56917	Hypothetical protein	ena	no
NAEGRscaffold_5	636114	636133	-	19	NAEGRDRAFT_78312	DUF1279 domain-containing protein	ena	no
NAEGRscaffold_5	665805	665852	+	47	NAEGRDRAFT_82952	obtusifoliol 14alpha-demethylase	ena	no
NAEGRscaffold_5	663881	663904	+	23	NAEGRDRAFT_35281	aminopeptidase	ena	no
NAEGRscaffold_5	496298	496355	+	57	NAEGRDRAFT_37747	clathrin coat assembly protein	ena	no
NAEGRscaffold_5	718899	719365	-	466	NAEGRDRAFT_56948	hypothetical protein	ena	no
NAEGRscaffold_5	606692	606695	-	3	NAEGRDRAFT_78307	serine/threonine protein kinase	ena	no
NAEGRscaffold_5	197354	197495	+	141	NAEGRDRAFT_82940	rab family small GTPase	ena	no
NAEGRscaffold_5	141510	141532	-	22	NAEGRDRAFT_78250	Hypothetical protein	ena	no
NAEGRscaffold_5	620892	620922	-	30	NAEGRDRAFT_35272	GTP-binding elongation factor Tu	ena	no
NAEGRscaffold_5	415167	415215	+	48	NAEGRDRAFT_37734	proteasome subunit alpha type 7	ena	no
NAEGRscaffold_5	845455	845601	+	146	NAEGRDRAFT_35326	calpain family cysteine protease domain-containing protein	ena	no
NAEGRscaffold_5	575094	575178	+	84	NAEGRDRAFT_77232	eukaryotic peptide chain release factor subunit 1	ena	no
NAEGRscaffold_5	184942	184992	-	50	NAEGRDRAFT_56891	predicted protein	ena	no
NAEGRscaffold_5	690602	690638	+	36	NAEGRDRAFT_78323	phospholipase D family protein	ena	no
NAEGRscaffold_5	701241	701267	+	26	NAEGRDRAFT_78325	myotubularin-related protein	ena	no
NAEGRscaffold_5	660071	660099	-	28	NAEGRDRAFT_78315	Hypothetical protein	ena	no
NAEGRscaffold_5	193842	193866	+	24	NAEGRDRAFT_78259	tripeptidyl-peptidase 1	ena	no
NAEGRscaffold_5	592481	592497	+	16	NAEGRDRAFT_78305	alpha 1,2 mannosidase	ena	no
NAEGRscaffold_5	220942	221043	+	101	NAEGRDRAFT_78265	hypothetical protein	ena	no
NAEGRscaffold_5	798743	798765	-	22	NAEGRDRAFT_56957	hypothetical protein	ena	no
NAEGRscaffold_5	35329	35377	-	48	NAEGRDRAFT_35199	hypothetical protein	ena	no
NAEGRscaffold_5	647868	647892	+	24	NAEGRDRAFT_78313	histone acetyltransferase	ena	no
NAEGRscaffold_5	210761	210787	+	26	NAEGRDRAFT_37722	ubiquitin activating enzyme	ena	no
NAEGRscaffold_5	87473	87473	+	0	NAEGRDRAFT_78241	non-receptor type protein tyrosine phosphatase	ena	no
NAEGRscaffold_5	385548	386182	+	634	NAEGRDRAFT_78268	SET domain-containing protein	ena	no
NAEGRscaffold_5	712120	712175	+	55	NAEGRDRAFT_82955	dynamin	ena	no
NAEGRscaffold_5	733780	733832	-	52	NAEGRDRAFT_55119	guanylate kinase	ena	no
NAEGRscaffold_5	461434	461478	-	44	NAEGRDRAFT_78284	cation transporter	ena	no
NAEGRscaffold_5	674544	674561	-	17	NAEGRDRAFT_78320	hypothetical protein	ena	no
NAEGRscaffold_5	150785	150805	-	20	NAEGRDRAFT_56885	hypothetical protein	ena	no
NAEGRscaffold_5	54444	54463	-	19	NAEGRDRAFT_78235	RING zinc finger transcription negative regulator protein	ena	no
NAEGRscaffold_5	424960	424976	+	16	NAEGRDRAFT_78278	predicted protein	ena	no
NAEGRscaffold_5	415337	415352	-	15	NAEGRDRAFT_78277	hypothetical protein	ena	no
NAEGRscaffold_5	590403	590505	+	102	NAEGRDRAFT_78304	cAMP-dependent protein kinase regulatory subunit	ena	no
NAEGRscaffold_5	511643	511657	-	14	NAEGRDRAFT_77230	squalene synthase	ena	no
NAEGRscaffold_5	797738	797763	+	25	NAEGRDRAFT_56956	hypothetical protein	ena	no
NAEGRscaffold_5	121040	121611	-	571	NAEGRDRAFT_78247	hypothetical protein	ena	no
NAEGRscaffold_5	437167	437231	-	64	NAEGRDRAFT_35238	PCNA proliferating cell nuclear antigen	ena	no
NAEGRscaffold_5	124940	124989	+	49	NAEGRDRAFT_78248	prolyl oligopeptidase family protein	ena	yes
NAEGRscaffold_5	120578	120930	+	352	NAEGRDRAFT_78246	hypothetical protein	ena	no
NAEGRscaffold_5	684028	684051	-	23	NAEGRDRAFT_35291	methylenetetrahydrofolate reductase	ena	no
NAEGRscaffold_5	596321	596380	+	59	NAEGRDRAFT_78306	LRR and dual specificity phosphatase domain-containing protein	ena	no
NAEGRscaffold_5	523255	523325	-	70	NAEGRDRAFT_78296	translocon-associated protein, alpha subunit	ena	no
NAEGRscaffold_5	113611	113643	+	32	NAEGRDRAFT_78244	gluconolactonase	ena	no
NAEGRscaffold_5	490511	490570	+	59	NAEGRDRAFT_78286	patatin-like phospholipase family protein	ena	no
NAEGRscaffold_5	93044	93198	-	154	NAEGRDRAFT_37709	20S proteosome alpha subunit	ena	no
NAEGRscaffold_5	453810	453818	+	8	NAEGRDRAFT_56911	SPRY domain-containing protein	ena	no
NAEGRscaffold_5	63959	64009	+	50	NAEGRDRAFT_78236	hypothetical protein	ena	no
NAEGRscaffold_5	200124	200232	+	108	NAEGRDRAFT_78261	mannosyltransferase	ena	no
NAEGRscaffold_5	528520	528545	-	25	NAEGRDRAFT_78297	phosphatidylinositol/phosphatidylglycerol transfer protein	ena	no
NAEGRscaffold_5	787727	787749	-	22	NAEGRDRAFT_78340	bactericidal permeability-increasing protein/lipopolysaccharide-binding protein	ena	no
NAEGRscaffold_5	486060	486319	-	259	NAEGRDRAFT_56913	N-acetylglucosamine-1-phosphodiester alpha-N-acetylglucosaminidase	ena	no
NAEGRscaffold_5	506923	506939	+	16	NAEGRDRAFT_56916	apoptosis antagonizing transcription factor	ena	no
NAEGRscaffold_5	686417	686483	-	66	NAEGRDRAFT_78322	DUF747 domain-containing protein	ena	no
NAEGRscaffold_5	739216	739287	-	71	NAEGRDRAFT_82958	hypothetical protein	ena	no
NAEGRscaffold_5	749893	750002	-	109	NAEGRDRAFT_56951	poly(A)-specific ribonuclease	ena	no
NAEGRscaffold_5	494568	494781	+	213	NAEGRDRAFT_78288	type II secretion system protein E	ena	no
NAEGRscaffold_5	538871	538883	-	12	NAEGRDRAFT_35256	phosphatidate cytidylyltransferase domain-containing protein	ena	yes
NAEGRscaffold_5	697400	697415	+	15	NAEGRDRAFT_35297	5'-methylthioadenosine phosphorylase	ena	no
NAEGRscaffold_5	493042	493151	+	109	NAEGRDRAFT_82946	ubiquitin-conjugating enzyme E2C	ena	no
NAEGRscaffold_5	176268	176969	-	701	NAEGRDRAFT_78255	hypothetical protein	ena	no
NAEGRscaffold_5	667081	667111	-	30	NAEGRDRAFT_56939	hypothetical protein	ena	no
NAEGRscaffold_5	79662	79702	-	40	NAEGRDRAFT_78240	HECTc domain-containing protein	ena	no
NAEGRscaffold_21	396579	396601	+	22	NAEGRDRAFT_79597	U3 small nucleolar interacting protein 2	ena	no
NAEGRscaffold_21	320800	320923	-	123	NAEGRDRAFT_79586	predicted protein	ena	no
NAEGRscaffold_21	19076	19120	-	44	NAEGRDRAFT_79541	mRNA deadenylase	ena	no
NAEGRscaffold_21	42261	42888	-	627	NAEGRDRAFT_79544	hypothetical protein	ena	no
NAEGRscaffold_21	47402	47417	-	15	NAEGRDRAFT_55753	nucleotide diphosphate sugar epimerase family protein	ena	no
NAEGRscaffold_21	341909	341920	-	11	NAEGRDRAFT_79591	kinesin-1	ena	no
NAEGRscaffold_21	324729	324741	-	12	NAEGRDRAFT_79587	G protein coupled receptor proteolytic domain-containing protein	ena	no
NAEGRscaffold_21	179420	179448	-	28	NAEGRDRAFT_79562	major facilitator superfamily permease	ena	no
NAEGRscaffold_21	263987	264030	-	43	NAEGRDRAFT_79575	hypothetical protein	ena	no
NAEGRscaffold_21	356401	356419	+	18	NAEGRDRAFT_79594	UDP-glucose-glycoprotein glucosyltransferase	ena	no
NAEGRscaffold_21	156697	156772	-	75	NAEGRDRAFT_79559	methylcrotonyl-CoA carboxylase	ena	no
NAEGRscaffold_21	300630	300644	+	14	NAEGRDRAFT_57908	FabG domain-containing protein	ena	no
NAEGRscaffold_21	336836	336870	+	34	NAEGRDRAFT_79590	spindle pole body protein spc97	ena	no
NAEGRscaffold_21	302384	302404	-	20	NAEGRDRAFT_79582	histone deacetylase complex subunit Sin3b	ena	no
NAEGRscaffold_21	411517	411571	+	54	NAEGRDRAFT_39042	charged multivesicular body protein 2a	ena	no
NAEGRscaffold_21	64875	64889	-	14	NAEGRDRAFT_79546	hypothetical protein	ena	no
NAEGRscaffold_21	168723	168762	-	39	NAEGRDRAFT_36506	3-methylcrotonoyl-CoA carboxylase beta subunit	ena	no
NAEGRscaffold_21	235167	235187	-	20	NAEGRDRAFT_79570	hypothetical protein	ena	no
NAEGRscaffold_21	293341	293364	+	23	NAEGRDRAFT_79579	hypothetical protein	ena	no
NAEGRscaffold_21	72595	72741	+	146	NAEGRDRAFT_79547	coiled coil domain-containing protein	ena	yes
NAEGRscaffold_21	207895	207981	+	86	NAEGRDRAFT_79568	nucleoporin	ena	no
NAEGRscaffold_21	133610	133632	+	22	NAEGRDRAFT_79555	phenylalanine-tRNA synthetase family protein, alpha subunit	ena	no
NAEGRscaffold_21	348242	348275	+	33	NAEGRDRAFT_79592	hypothetical protein	ena	no
NAEGRscaffold_21	396664	396680	-	16	NAEGRDRAFT_79598	3' exoribonuclease domain-containing protein	ena	no
NAEGRscaffold_21	187494	187521	-	27	NAEGRDRAFT_79563	kinesin-6	ena	no
NAEGRscaffold_21	320796	320807	+	11	NAEGRDRAFT_79585	predicted protein	ena	no
NAEGRscaffold_21	74417	74431	+	14	NAEGRDRAFT_77369	eukaryotic glutathione synthetase	ena	no
NAEGRscaffold_21	350506	351928	+	1422	NAEGRDRAFT_79593	calcium binding protein 39-like protein	ena	yes
NAEGRscaffold_21	215398	215463	-	65	NAEGRDRAFT_79569	nuclear lim interactor-interacting protein	ena	no
NAEGRscaffold_21	401883	401922	-	39	NAEGRDRAFT_79600	multimeric flavodoxin WrbA	ena	no
NAEGRscaffold_21	408149	408162	+	13	NAEGRDRAFT_79601	zf-C3HC4 domain-containing protein	ena	no
NAEGRscaffold_21	250297	250313	-	16	NAEGRDRAFT_79573	GAL4 domain-containing protein	ena	no
NAEGRscaffold_21	95006	95329	-	323	NAEGRDRAFT_79551	LSM11_C domain-containing protein	ena	no
NAEGRscaffold_21	260956	260994	-	38	NAEGRDRAFT_83127	3-oxo-5-alpha-steroid 4-dehydrogenase family protein	ena	no
NAEGRscaffold_21	286814	286844	-	30	NAEGRDRAFT_79578	hypothetical protein	ena	no
NAEGRscaffold_21	79921	80085	-	164	NAEGRDRAFT_79550	serine/threonine protein kinase	ena	yes
NAEGRscaffold_21	361857	361937	+	80	NAEGRDRAFT_39026	Delta9 fatty acid desaturase family protein	ena	no
NAEGRscaffold_21	310811	310816	+	5	NAEGRDRAFT_79583	arfGTPase-activating protein	ena	no
NAEGRscaffold_21	401830	401858	+	28	NAEGRDRAFT_79599	transcription factor IIIC-gamma subunit	ena	no
NAEGRscaffold_21	806056	806163	-	107	NAEGRDRAFT_79604	G-protein beta WD-40 repeat domain-containing protein	ena	no
NAEGRscaffold_21	196203	196242	-	39	NAEGRDRAFT_79566	hypothetical protein	ena	no
NAEGRscaffold_21	803289	803332	-	43	NAEGRDRAFT_39045	ribosomal protein S7	ena	no
NAEGRscaffold_21	275978	275993	-	15	NAEGRDRAFT_57903	hypothetical protein	ena	no
NAEGRscaffold_21	296620	296657	+	37	NAEGRDRAFT_79580	lon protease	ena	no
NAEGRscaffold_21	20776	20811	-	35	NAEGRDRAFT_79542	alpha/beta hydrolase	ena	no
NAEGRscaffold_21	334552	334578	+	26	NAEGRDRAFT_88171	hypothetical protein	ena	no
NAEGRscaffold_21	131736	131754	+	18	NAEGRDRAFT_38988	hypothetical protein	ena	no
NAEGRscaffold_21	243089	243287	+	198	NAEGRDRAFT_79571	predicted protein	ena	no
NAEGRscaffold_21	380989	381085	-	96	NAEGRDRAFT_79596	hypothetical protein	ena	no
NAEGRscaffold_21	192086	192171	+	85	NAEGRDRAFT_79564	histone H2B	ena	no
NAEGRscaffold_21	16691	17188	-	497	NAEGRDRAFT_57875	predicted protein	ena	no
NAEGRscaffold_21	284366	284381	+	15	NAEGRDRAFT_79577	diaphanous-related formin	ena	no
NAEGRscaffold_21	153041	153065	-	24	NAEGRDRAFT_57890	hypothetical protein	ena	no
NAEGRscaffold_21	329585	329688	-	103	NAEGRDRAFT_79588	cyclin-like F-box domain-containing protein	ena	no
NAEGRscaffold_21	175456	175481	+	25	NAEGRDRAFT_79561	kinesin-1	ena	no
NAEGRscaffold_21	374253	374276	+	23	NAEGRDRAFT_57921	hypothetical protein	ena	no
NAEGRscaffold_21	198413	198487	+	74	NAEGRDRAFT_79567	hypothetical protein	ena	no
NAEGRscaffold_14	653348	653376	-	28	NAEGRDRAFT_36065	programmed cell death 6 protein	ena	no
NAEGRscaffold_14	746940	746976	+	36	NAEGRDRAFT_79129	hypothetical protein	ena	no
NAEGRscaffold_14	255073	255078	+	5	NAEGRDRAFT_57531	predicted protein	ena	no
NAEGRscaffold_14	603631	603656	+	25	NAEGRDRAFT_79097	ankyrin-repeat-containing protein	ena	no
NAEGRscaffold_14	579411	579439	+	28	NAEGRDRAFT_79094	tRNA pseudouridine synthase family protein	ena	no
NAEGRscaffold_14	593072	593205	+	133	NAEGRDRAFT_79095	predicted protein	ena	no
NAEGRscaffold_14	687969	688442	+	473	NAEGRDRAFT_79123	ankyrin repeat-containing protein	ena	no
NAEGRscaffold_14	261385	261444	+	59	NAEGRDRAFT_36023	predicted protein	ena	no
NAEGRscaffold_14	179878	179962	-	84	NAEGRDRAFT_57523	predicted protein	ena	no
NAEGRscaffold_14	152856	153086	-	230	NAEGRDRAFT_79070	hypothetical protein	ena	no
NAEGRscaffold_14	669843	669888	-	45	NAEGRDRAFT_79118	hypothetical protein	ena	no
NAEGRscaffold_14	735745	735822	+	77	NAEGRDRAFT_38575	mitochondrial carnitine/acylcarnitine translocase	ena	no
NAEGRscaffold_14	146346	146389	+	43	NAEGRDRAFT_79068	RNA binding domain-containing protein	ena	no
NAEGRscaffold_14	285549	285566	-	17	NAEGRDRAFT_36024	dual specificity phosphatase	ena	no
NAEGRscaffold_14	626358	626555	-	197	NAEGRDRAFT_57544	leucine rich repeat domain-containing protein	ena	no
NAEGRscaffold_14	101899	101971	-	72	NAEGRDRAFT_79062	hypothetical protein	ena	no
NAEGRscaffold_14	690965	691071	-	106	NAEGRDRAFT_79124	hypothetical protein	ena	no
NAEGRscaffold_14	735785	736107	-	322	NAEGRDRAFT_79128	predicted protein	ena	no
NAEGRscaffold_14	682103	682161	+	58	NAEGRDRAFT_79121	serine/threonine protein kinase	ena	no
NAEGRscaffold_14	614831	614906	+	75	NAEGRDRAFT_38542	predicted protein	ena	no
NAEGRscaffold_14	631369	631395	+	26	NAEGRDRAFT_57545	TPR-containing protein	ena	no
NAEGRscaffold_14	677214	677234	+	20	NAEGRDRAFT_79120	hypothetical protein	ena	no
NAEGRscaffold_14	606653	606684	+	31	NAEGRDRAFT_79099	DHDD domain-containing protein	ena	no
NAEGRscaffold_14	644458	644496	-	38	NAEGRDRAFT_57548	glutamate-1-semialdehyde aminotransferase	ena	no
NAEGRscaffold_14	255067	255103	-	36	NAEGRDRAFT_36021	predicted protein	ena	no
NAEGRscaffold_14	47407	47432	+	25	NAEGRDRAFT_79057	predicted protein	ena	no
NAEGRscaffold_14	731129	731213	-	84	NAEGRDRAFT_57557	purine deaminase	ena	no
NAEGRscaffold_14	228924	228943	-	19	NAEGRDRAFT_79081	predicted protein	ena	no
NAEGRscaffold_14	554430	554460	-	30	NAEGRDRAFT_38530	predicted protein	ena	no
NAEGRscaffold_14	213166	213195	-	29	NAEGRDRAFT_79080	hypothetical protein	ena	no
NAEGRscaffold_14	28678	28720	-	42	NAEGRDRAFT_57506	dicer helicase	ena	no
NAEGRscaffold_14	297908	297946	+	38	NAEGRDRAFT_82527	predicted protein	ena	no
NAEGRscaffold_14	19915	19965	-	50	NAEGRDRAFT_35997	predicted protein	ena	no
NAEGRscaffold_14	647556	647684	+	128	NAEGRDRAFT_79111	fructose-6-phosphate 2-kinase	ena	no
NAEGRscaffold_14	195786	196218	+	432	NAEGRDRAFT_79076	FAD binding/oxidoreductase	ena	no
NAEGRscaffold_14	196569	197155	-	586	NAEGRDRAFT_57526	hypothetical protein	ena	no
NAEGRscaffold_14	613390	613430	+	40	NAEGRDRAFT_79101	electron transfer flavoprotein-ubiquinone oxidoreductase	ena	no
NAEGRscaffold_14	62646	62664	-	18	NAEGRDRAFT_79059	hypothetical protein	ena	no
NAEGRscaffold_14	165975	166003	-	28	NAEGRDRAFT_79072	serine/threonine protein kinase	ena	no
NAEGRscaffold_14	750679	750695	-	16	NAEGRDRAFT_79130	RGS-domain-containing protein	ena	no
NAEGRscaffold_14	301326	301351	-	25	NAEGRDRAFT_79090	glutamate-cysteine ligase catalytic subunit	ena	no
NAEGRscaffold_14	190771	190803	-	32	NAEGRDRAFT_57524	chloride channel protein	ena	no
NAEGRscaffold_14	40689	40930	-	241	NAEGRDRAFT_79056	MORN domain-containing protein	ena	no
NAEGRscaffold_14	759127	759158	+	31	NAEGRDRAFT_79132	hypothetical protein	ena	no
NAEGRscaffold_14	179893	179910	+	17	NAEGRDRAFT_38509	predicted protein	ena	no
NAEGRscaffold_14	663231	663255	+	24	NAEGRDRAFT_79116	hypothetical protein	ena	no
NAEGRscaffold_14	139385	139414	+	29	NAEGRDRAFT_79067	plekstrin homology domain-containing protein	ena	no
NAEGRscaffold_14	132081	132255	-	174	NAEGRDRAFT_57515	predicted protein	ena	no
NAEGRscaffold_14	665693	665720	-	27	NAEGRDRAFT_36068	predicted protein	ena	no
NAEGRscaffold_14	672562	672642	-	80	NAEGRDRAFT_36072	rho family small GTPase	ena	no
NAEGRscaffold_14	12277	12291	+	14	NAEGRDRAFT_79052	HEAT domain-containing protein	ena	no
NAEGRscaffold_14	26802	26823	+	21	NAEGRDRAFT_79054	hypothetical protein	ena	no
NAEGRscaffold_14	576406	576438	+	32	NAEGRDRAFT_79092	predicted protein	ena	no
NAEGRscaffold_14	70304	70370	-	66	NAEGRDRAFT_57510	villin	ena	no
NAEGRscaffold_14	113923	113946	-	23	NAEGRDRAFT_79063	hypothetical protein	ena	no
NAEGRscaffold_14	147466	147478	-	12	NAEGRDRAFT_79069	ankyrin repeat domain-containing protein	ena	no
NAEGRscaffold_14	297915	298097	-	182	NAEGRDRAFT_79089	hypothetical protein	ena	no
NAEGRscaffold_14	641630	641693	-	63	NAEGRDRAFT_79109	succinate-CoA ligase (ADP-forming)	ena	no
NAEGRscaffold_14	760014	760186	+	172	NAEGRDRAFT_79133	GCN5-related N-acetyltransferase	ena	no
NAEGRscaffold_14	129500	129611	-	111	NAEGRDRAFT_79065	hypothetical protein	ena	no
NAEGRscaffold_14	619020	619201	-	181	NAEGRDRAFT_79104	monosaccharide transporter	ena	no
NAEGRscaffold_14	649412	649434	+	22	NAEGRDRAFT_79112	ATP binding domain family protein	ena	no
NAEGRscaffold_14	634272	634301	-	29	NAEGRDRAFT_79107	endomembrane protein 70	ena	no
NAEGRscaffold_14	293070	293084	+	14	NAEGRDRAFT_79087	predicted protein	ena	no
NAEGRscaffold_14	236223	236243	-	20	NAEGRDRAFT_79082	glycosyltransferase	ena	no
NAEGRscaffold_14	65251	65298	-	47	NAEGRDRAFT_56080	predicted protein	ena	no
NAEGRscaffold_14	654231	654283	-	52	NAEGRDRAFT_79115	rhodanese homology domain-containing protein	ena	yes
NAEGRscaffold_14	163528	164110	+	582	NAEGRDRAFT_36010	predicted protein	ena	no
NAEGRscaffold_14	265111	265128	+	17	NAEGRDRAFT_79086	hydrolase	ena	no
NAEGRscaffold_14	576392	576574	-	182	NAEGRDRAFT_79093	hypothetical protein	ena	no
NAEGRscaffold_14	59812	59834	+	22	NAEGRDRAFT_38497	predicted protein	ena	no
NAEGRscaffold_14	683150	683189	+	39	NAEGRDRAFT_79122	hypothetical protein	ena	no
NAEGRscaffold_14	757259	757278	+	19	NAEGRDRAFT_57561	hypothetical protein	ena	no
NAEGRscaffold_25	237337	237343	+	6	NAEGRDRAFT_58112	predicted protein	ena	no
NAEGRscaffold_25	295298	295302	+	4	NAEGRDRAFT_55285	predicted protein	ena	yes
NAEGRscaffold_25	114322	114344	+	22	NAEGRDRAFT_36730	predicted protein	ena	no
NAEGRscaffold_25	286413	286435	+	22	NAEGRDRAFT_58119	predicted protein	ena	no
NAEGRscaffold_25	305446	305468	+	22	NAEGRDRAFT_79855	hypothetical protein	ena	no
NAEGRscaffold_25	337913	337941	+	28	NAEGRDRAFT_79862	predicted protein	ena	no
NAEGRscaffold_25	75551	75583	-	32	NAEGRDRAFT_39216	rho family small GTPase	ena	no
NAEGRscaffold_25	99554	99570	-	16	NAEGRDRAFT_79823	predicted protein	ena	no
NAEGRscaffold_25	344453	344515	-	62	NAEGRDRAFT_88153	kinesin-3	ena	no
NAEGRscaffold_25	152091	152152	-	61	NAEGRDRAFT_79830	arfGTPase-activating protein	ena	no
NAEGRscaffold_25	247551	247640	+	89	NAEGRDRAFT_79845	predicted protein	ena	no
NAEGRscaffold_25	173333	173367	+	34	NAEGRDRAFT_58103	hypothetical protein	ena	no
NAEGRscaffold_25	49186	49285	+	99	NAEGRDRAFT_58086	hypothetical protein	ena	no
NAEGRscaffold_25	363901	363945	+	44	NAEGRDRAFT_83164	predicted protein	ena	no
NAEGRscaffold_25	314463	314587	-	124	NAEGRDRAFT_79857	NADH dehydrogenase	ena	no
NAEGRscaffold_25	278386	278402	+	16	NAEGRDRAFT_79850	hypothetical protein	ena	no
NAEGRscaffold_25	91986	92073	-	87	NAEGRDRAFT_39221	alpha-tubulin TUBA2	ena	no
NAEGRscaffold_25	374650	374662	-	12	NAEGRDRAFT_79871	predicted protein	ena	no
NAEGRscaffold_25	408900	408936	+	36	NAEGRDRAFT_79878	predicted protein	ena	no
NAEGRscaffold_25	370608	370639	-	31	NAEGRDRAFT_36778	predicted protein	ena	no
NAEGRscaffold_25	385574	385590	-	16	NAEGRDRAFT_79873	predicted protein	ena	no
NAEGRscaffold_25	25673	25729	-	56	NAEGRDRAFT_79811	predicted protein	ena	no
NAEGRscaffold_25	185151	185172	+	21	NAEGRDRAFT_58105	predicted protein	ena	no
NAEGRscaffold_25	220727	221051	+	324	NAEGRDRAFT_36743	predicted protein	ena	no
NAEGRscaffold_25	312741	312783	-	42	NAEGRDRAFT_36760	predicted protein	ena	no
NAEGRscaffold_25	395435	395562	-	127	NAEGRDRAFT_79874	predicted protein	ena	no
NAEGRscaffold_25	359611	359658	+	47	NAEGRDRAFT_79867	hypothetical protein	ena	no
NAEGRscaffold_25	249614	249673	-	59	NAEGRDRAFT_58114	predicted protein	ena	no
NAEGRscaffold_25	301211	301236	-	25	NAEGRDRAFT_39251	serine C-palmitoyltransferase	ena	no
NAEGRscaffold_25	321710	321739	+	29	NAEGRDRAFT_36765	ubiquinone/menaquinone biosynthesis methyltransferase	ena	no
NAEGRscaffold_25	400646	400659	-	13	NAEGRDRAFT_36791	2-amino-3-ketobutyrate CoA ligase	ena	no
NAEGRscaffold_25	324341	324360	-	19	NAEGRDRAFT_79861	hypothetical protein	ena	no
NAEGRscaffold_25	158497	158565	+	68	NAEGRDRAFT_79831	predicted protein	ena	no
NAEGRscaffold_25	240150	240205	+	55	NAEGRDRAFT_79843	tubulin tyrosine ligase family	ena	no
NAEGRscaffold_25	121724	121779	-	55	NAEGRDRAFT_58096	predicted protein	ena	no
NAEGRscaffold_25	44829	44881	-	52	NAEGRDRAFT_82614	C-4 sterol methyl oxidase	ena	no
NAEGRscaffold_25	87482	87523	-	41	NAEGRDRAFT_58090	NSF attachment protein	ena	no
NAEGRscaffold_25	85065	85092	+	27	NAEGRDRAFT_79819	rasGEF domain-containing protein	ena	no
NAEGRscaffold_25	175919	175940	+	21	NAEGRDRAFT_56173	predicted protein	ena	no
NAEGRscaffold_25	241704	241725	+	21	NAEGRDRAFT_36745	predicted protein	ena	no
NAEGRscaffold_25	135341	135437	+	96	NAEGRDRAFT_39225	predicted protein	ena	no
NAEGRscaffold_25	38319	38408	-	89	NAEGRDRAFT_79812	rho family small GTPase	ena	no
NAEGRscaffold_25	231688	231693	+	5	NAEGRDRAFT_79841	predicted protein	ena	no
NAEGRscaffold_25	171198	171339	+	141	NAEGRDRAFT_79832	predicted protein	ena	yes
NAEGRscaffold_25	149792	149877	+	85	NAEGRDRAFT_79829	hypothetical protein	ena	no
NAEGRscaffold_25	182951	183007	+	56	NAEGRDRAFT_82621	predicted protein	ena	no
NAEGRscaffold_25	399448	399462	+	14	NAEGRDRAFT_39279	hypothetical protein	ena	no
NAEGRscaffold_25	71244	71447	+	203	NAEGRDRAFT_79817	predicted protein	ena	no
NAEGRscaffold_25	316153	316293	+	140	NAEGRDRAFT_79858	predicted protein	ena	no
NAEGRscaffold_4	490405	490446	-	41	NAEGRDRAFT_78191	hexosaminidase B	ena	no
NAEGRscaffold_4	644372	644378	-	6	NAEGRDRAFT_56856	hypothetical protein	ena	no
NAEGRscaffold_4	103483	103581	-	98	NAEGRDRAFT_78138	metallophosphoesterase-like protein	ena	no
NAEGRscaffold_4	144204	144423	-	219	NAEGRDRAFT_78143	predicted protein	ena	no
NAEGRscaffold_4	279965	280022	+	57	NAEGRDRAFT_78161	SANT domain-containing protein	ena	no
NAEGRscaffold_4	631731	631796	-	65	NAEGRDRAFT_78215	rab gdp dissociation inhibitor alpha	ena	no
NAEGRscaffold_4	577838	577859	-	21	NAEGRDRAFT_37668	UbiE domain-containing protein	ena	no
NAEGRscaffold_4	342471	342507	-	36	NAEGRDRAFT_78174	hypothetical protein	ena	no
NAEGRscaffold_4	79427	79485	+	58	NAEGRDRAFT_35098	methylmalonate-semialdehyde dehydrogenase	ena	no
NAEGRscaffold_4	487057	487114	-	57	NAEGRDRAFT_78190	hypothetical protein	ena	no
NAEGRscaffold_4	368986	369022	-	36	NAEGRDRAFT_78178	amino acid abc transporter	ena	no
NAEGRscaffold_4	292489	292563	+	74	NAEGRDRAFT_56811	RWP-RK domain-containing protein	ena	no
NAEGRscaffold_4	324333	324371	-	38	NAEGRDRAFT_78171	ribophorin I	ena	no
NAEGRscaffold_4	461277	461295	-	18	NAEGRDRAFT_78186	G-protein alpha subunit	ena	no
NAEGRscaffold_4	427821	428042	-	221	NAEGRDRAFT_78184	hypothetical protein	ena	no
NAEGRscaffold_4	648423	648456	+	33	NAEGRDRAFT_78218	guanine nucleotide-binding protein G(o) subunit alpha	ena	no
NAEGRscaffold_4	177016	177055	+	39	NAEGRDRAFT_78148	member of the abc stransporter B protein family	ena	no
NAEGRscaffold_4	455455	455481	+	26	NAEGRDRAFT_56829	adenylate cyclase-associated protein	ena	no
NAEGRscaffold_4	370307	370347	-	40	NAEGRDRAFT_56823	hypothetical protein	ena	no
NAEGRscaffold_4	625017	625029	+	12	NAEGRDRAFT_78213	predicted protein	ena	no
NAEGRscaffold_4	226054	226072	-	18	NAEGRDRAFT_56805	hypothetical protein	ena	no
NAEGRscaffold_4	114404	114423	-	19	NAEGRDRAFT_56792	hypothetical protein	ena	no
NAEGRscaffold_4	659411	659434	-	23	NAEGRDRAFT_78220	abc transporter	ena	no
NAEGRscaffold_4	316482	316611	-	129	NAEGRDRAFT_78168	tripeptidylpeptidase II	ena	yes
NAEGRscaffold_4	499253	499338	+	85	NAEGRDRAFT_78192	dolichyl-diphosphooligosaccharide protein glycosyltransferase	ena	no
NAEGRscaffold_4	446724	446803	+	79	NAEGRDRAFT_35145	acetyl-coenzyme A synthetase	ena	yes
NAEGRscaffold_4	53493	53510	+	17	NAEGRDRAFT_56783	phytanoyl-CoA dioxygenase-like protein	ena	no
NAEGRscaffold_4	77094	77127	+	33	NAEGRDRAFT_56787	TPR repeat domain-containing protein	ena	no
NAEGRscaffold_4	552397	552525	-	128	NAEGRDRAFT_78202	syntaxin	ena	no
NAEGRscaffold_4	653605	653671	-	66	NAEGRDRAFT_78219	hypothetical protein	ena	no
NAEGRscaffold_4	473317	473334	-	17	NAEGRDRAFT_78188	guanine nucleotide binding protein alpha subunit	ena	no
NAEGRscaffold_4	515926	515941	+	15	NAEGRDRAFT_78194	autophagy 9	ena	no
NAEGRscaffold_4	322322	322587	-	265	NAEGRDRAFT_35127	eukaryotic peptide chain release factor subunit 1	ena	no
NAEGRscaffold_4	665732	665741	-	9	NAEGRDRAFT_56860	predicted protein	ena	no
NAEGRscaffold_4	603466	603501	+	35	NAEGRDRAFT_78208	DNK domain-containing protein	ena	no
NAEGRscaffold_4	184171	184189	-	18	NAEGRDRAFT_78149	hypothetical protein	ena	no
NAEGRscaffold_4	153891	154176	+	285	NAEGRDRAFT_78145	predicted protein	ena	no
NAEGRscaffold_4	377059	377147	+	88	NAEGRDRAFT_56824	hypothetical protein	ena	no
NAEGRscaffold_4	367645	367720	+	75	NAEGRDRAFT_78177	hypothetical protein	ena	no
NAEGRscaffold_4	336894	336944	+	50	NAEGRDRAFT_56817	rasGTPase-activating protein	ena	no
NAEGRscaffold_4	39984	40100	+	116	NAEGRDRAFT_78129	hypothetical protein	ena	no
NAEGRscaffold_4	620084	620111	+	27	NAEGRDRAFT_37676	peptidase S28	ena	no
NAEGRscaffold_4	698792	698803	+	11	NAEGRDRAFT_78227	hypothetical protein	ena	no
NAEGRscaffold_4	57611	57780	+	169	NAEGRDRAFT_82922	glutamine synthase	ena	yes
NAEGRscaffold_4	53623	53664	-	41	NAEGRDRAFT_55595	dihydrolipoamide succinyltransferase	ena	no
NAEGRscaffold_4	428680	428703	-	23	NAEGRDRAFT_35141	phosphoglycerate mutase 1	ena	yes
NAEGRscaffold_4	29869	29895	-	26	NAEGRDRAFT_78127	hypothetical protein	ena	no
NAEGRscaffold_4	520493	520645	+	152	NAEGRDRAFT_78196	rho small GTPase	ena	no
NAEGRscaffold_4	284889	284900	+	11	NAEGRDRAFT_77215	aminocyclopropane carboxylate synthase	ena	no
NAEGRscaffold_4	84816	84849	-	33	NAEGRDRAFT_78136	ATP-dependent DEAD/H RNA helicase	ena	no
NAEGRscaffold_4	149435	150214	-	779	NAEGRDRAFT_78144	hypothetical protein	ena	no
NAEGRscaffold_4	611243	611310	+	67	NAEGRDRAFT_56850	hypothetical protein	ena	no
NAEGRscaffold_4	141432	141437	+	5	NAEGRDRAFT_78142	hypothetical protein	ena	no
NAEGRscaffold_4	191321	191427	+	106	NAEGRDRAFT_78150	armadillo repeat domain-containing protein	ena	no
NAEGRscaffold_4	156813	156832	+	19	NAEGRDRAFT_78146	multi-sensor hybrid histidine kinase	ena	no
NAEGRscaffold_4	248542	248591	+	49	NAEGRDRAFT_78157	cytochrome p450	ena	no
NAEGRscaffold_4	322251	322264	+	13	NAEGRDRAFT_78169	hypothetical protein	ena	no
NAEGRscaffold_4	571060	571075	-	15	NAEGRDRAFT_56845	hypothetical protein	ena	yes
NAEGRscaffold_4	35959	35976	+	17	NAEGRDRAFT_78128	hypothetical protein	ena	no
NAEGRscaffold_4	28516	28606	-	90	NAEGRDRAFT_78126	BtuE domain-containing protein	ena	no
NAEGRscaffold_4	633462	633567	-	105	NAEGRDRAFT_82452	aminotransferase	ena	no
NAEGRscaffold_4	137978	138307	-	329	NAEGRDRAFT_78141	hypothetical protein	ena	no
NAEGRscaffold_4	199611	199756	+	145	NAEGRDRAFT_78151	SNF2 domain-containing protein	ena	no
NAEGRscaffold_4	685407	685443	+	36	NAEGRDRAFT_78224	hypothetical protein	ena	no
NAEGRscaffold_4	264419	264467	-	48	NAEGRDRAFT_78159	erythrocyte membrane-associated giant protein antigen 332-like protein	ena	no
NAEGRscaffold_4	546345	546350	+	5	NAEGRDRAFT_78200	rhoGEF domain-containing protein	ena	no
NAEGRscaffold_4	203424	203445	-	21	NAEGRDRAFT_78152	adenylate/guanylate cyclase	ena	no
NAEGRscaffold_4	381174	381203	+	29	NAEGRDRAFT_78181	calponin homology domain-containing protein	ena	no
NAEGRscaffold_4	554175	554507	-	332	NAEGRDRAFT_78203	sensor histidine kinase/response regulator	ena	no
NAEGRscaffold_4	690813	690897	-	84	NAEGRDRAFT_78226	hypothetical protein	ena	no
NAEGRscaffold_4	603544	603576	-	32	NAEGRDRAFT_78209	SNF-related serine/threonine-protein kinase	ena	no
NAEGRscaffold_4	295347	296138	+	791	NAEGRDRAFT_78164	rRNA (uridine-2'-O-)-methyltransferase	ena	yes
NAEGRscaffold_4	518764	518782	+	18	NAEGRDRAFT_78195	leucine aminopeptidase	ena	no
NAEGRscaffold_4	246681	246941	+	260	NAEGRDRAFT_78156	histidine kinase-like ATPase protein	ena	no
NAEGRscaffold_4	537413	537413	+	0	NAEGRDRAFT_78199	exoribonucelase, VacB family	ena	no
NAEGRscaffold_4	230074	230434	-	360	NAEGRDRAFT_78154	hypothetical protein	ena	no
NAEGRscaffold_4	23875	23901	-	26	NAEGRDRAFT_78125	cathepsin Z	ena	no
NAEGRscaffold_4	625009	625034	-	25	NAEGRDRAFT_82450	predicted protein	ena	no
NAEGRscaffold_4	463026	463258	-	232	NAEGRDRAFT_78187	hypothetical protein	ena	no
NAEGRscaffold_4	311844	311854	+	10	NAEGRDRAFT_82443	hypothetical protein	ena	no
NAEGRscaffold_4	566900	566955	-	55	NAEGRDRAFT_35163	40S ribosomal protein S16	ena	no
NAEGRscaffold_4	352780	352813	+	33	NAEGRDRAFT_77219	lysyl tRNA synthetase	ena	no
NAEGRscaffold_4	618267	618292	+	25	NAEGRDRAFT_35172	aminopeptidase N	ena	no
NAEGRscaffold_4	586043	586091	+	48	NAEGRDRAFT_56847	hypothetical protein	ena	no
NAEGRscaffold_4	270986	271002	-	16	NAEGRDRAFT_78160	rhomboid domain-containing protein	ena	no
NAEGRscaffold_4	382709	382975	-	266	NAEGRDRAFT_56826	hypothetical protein	ena	no
NAEGRscaffold_4	171122	171165	+	43	NAEGRDRAFT_56799	actin-binding kettin protein	ena	yes
NAEGRscaffold_4	313111	313201	+	90	NAEGRDRAFT_35122	rab family small GTPase	ena	yes
NAEGRscaffold_4	338591	338602	-	11	NAEGRDRAFT_56818	arginyltransferase 1-like protein	ena	no
NAEGRscaffold_4	264414	264441	+	27	NAEGRDRAFT_56808	RING finger domain-containing protein	ena	no
NAEGRscaffold_4	703566	703582	-	16	NAEGRDRAFT_78228	hypothetical protein	ena	no
NAEGRscaffold_6	154328	154519	-	191	NAEGRDRAFT_78369	predicted protein	ena	no
NAEGRscaffold_6	348002	348023	-	21	NAEGRDRAFT_82969	glutaryl-coenzyme A dehydrogenase	ena	no
NAEGRscaffold_6	267903	268680	+	777	NAEGRDRAFT_78384	predicted protein	ena	no
NAEGRscaffold_6	426643	426658	-	15	NAEGRDRAFT_37886	predicted protein	ena	no
NAEGRscaffold_6	556021	556063	+	42	NAEGRDRAFT_77246	ARF/SAR family small GTPase	ena	no
NAEGRscaffold_6	54698	54763	+	65	NAEGRDRAFT_78354	predicted protein	ena	no
NAEGRscaffold_6	698290	698346	+	56	NAEGRDRAFT_78445	RGS domain-containing protein	ena	no
NAEGRscaffold_6	390630	390661	+	31	NAEGRDRAFT_78399	saccharopine dehydrogenase	ena	no
NAEGRscaffold_6	512129	512255	+	126	NAEGRDRAFT_78416	hypothetical protein	ena	no
NAEGRscaffold_6	36486	36582	-	96	NAEGRDRAFT_56963	rab family small GTPase	ena	no
NAEGRscaffold_6	545647	545681	-	34	NAEGRDRAFT_78427	hypothetical protein	ena	no
NAEGRscaffold_6	675443	675471	-	28	NAEGRDRAFT_77247	alanine aminotransferase	ena	no
NAEGRscaffold_6	513706	513736	+	30	NAEGRDRAFT_57012	40s ribosomal protein S3a	ena	no
NAEGRscaffold_6	407506	407523	+	17	NAEGRDRAFT_35386	hypothetical protein	ena	no
NAEGRscaffold_6	542295	542380	-	85	NAEGRDRAFT_78426	predicted protein	ena	no
NAEGRscaffold_6	222960	223215	+	255	NAEGRDRAFT_78375	glucose 6-phosphate dehydrogenase	ena	no
NAEGRscaffold_6	140571	140595	-	24	NAEGRDRAFT_56975	subtilase family serine protease	ena	no
NAEGRscaffold_6	536167	536211	+	44	NAEGRDRAFT_57016	DIL domain-containing protein	ena	no
NAEGRscaffold_6	533344	533353	+	9	NAEGRDRAFT_78422	serine/threonine protein kinase	ena	no
NAEGRscaffold_6	272537	272578	+	41	NAEGRDRAFT_78386	hypothetical protein	ena	no
NAEGRscaffold_6	477307	477320	+	13	NAEGRDRAFT_57006	hypothetical protein	ena	no
NAEGRscaffold_6	247259	247296	-	37	NAEGRDRAFT_82967	60S ribosomal protein L23	ena	no
NAEGRscaffold_6	353232	353255	+	23	NAEGRDRAFT_78395	predicted protein	ena	no
NAEGRscaffold_6	280654	280691	+	37	NAEGRDRAFT_82968	sec61-like protein	ena	no
NAEGRscaffold_6	371269	371409	-	140	NAEGRDRAFT_56997	UBX domain-containing protein	ena	yes
NAEGRscaffold_6	691326	691356	+	30	NAEGRDRAFT_78444	predicted protein	ena	no
NAEGRscaffold_6	198833	198961	-	128	NAEGRDRAFT_78371	2OG-Fe(II) oxygenase family protein	ena	no
NAEGRscaffold_6	103858	103924	+	66	NAEGRDRAFT_78361	hypothetical protein	ena	no
NAEGRscaffold_6	492040	492631	-	591	NAEGRDRAFT_78413	predicted protein	ena	no
NAEGRscaffold_6	575295	575313	+	18	NAEGRDRAFT_57022	hypothetical protein	ena	no
NAEGRscaffold_6	565517	565557	-	40	NAEGRDRAFT_57020	aminopeptidase	ena	no
NAEGRscaffold_6	110136	110173	+	37	NAEGRDRAFT_82963	S-phase kinase-associated protein	ena	no
NAEGRscaffold_6	50377	50397	+	20	NAEGRDRAFT_78352	CCR4-Not complex component	ena	no
NAEGRscaffold_6	337297	337347	-	50	NAEGRDRAFT_78392	hypothetical protein	ena	no
NAEGRscaffold_6	653036	653140	-	104	NAEGRDRAFT_78440	small nucleolar RNP Gar1p	ena	no
NAEGRscaffold_6	526884	527039	+	155	NAEGRDRAFT_78421	ATP/ADP translocator	ena	no
NAEGRscaffold_6	638668	638730	+	62	NAEGRDRAFT_82973	lysosomal carboxypeptidase	ena	no
NAEGRscaffold_6	471718	471733	+	15	NAEGRDRAFT_78409	hypothetical protein	ena	no
NAEGRscaffold_6	204275	204301	+	26	NAEGRDRAFT_82965	cysteine protease	ena	no
NAEGRscaffold_6	53772	53888	+	116	NAEGRDRAFT_78353	hypothetical protein	ena	no
NAEGRscaffold_6	118952	118970	-	18	NAEGRDRAFT_78364	phosphorylated CTD interacting factor	ena	no
NAEGRscaffold_6	349768	349904	-	136	NAEGRDRAFT_35375	proteasome maturation factor UMP1	ena	no
NAEGRscaffold_6	40538	40571	+	33	NAEGRDRAFT_78351	ankyrin repeat domain-containing protein	ena	no
NAEGRscaffold_6	101765	101865	+	100	NAEGRDRAFT_78360	hypothetical protein	ena	no
NAEGRscaffold_6	505185	505238	-	53	NAEGRDRAFT_37891	mitochondrial elongation factor Tu	ena	yes
NAEGRscaffold_6	575386	575406	-	20	NAEGRDRAFT_78433	predicted protein	ena	no
NAEGRscaffold_6	330041	330064	-	23	NAEGRDRAFT_78391	nucleostemin family protein	ena	no
NAEGRscaffold_6	193596	193630	+	34	NAEGRDRAFT_77239	hypothetical protein	ena	no
NAEGRscaffold_6	502056	502080	+	24	NAEGRDRAFT_78414	hypothetical protein	ena	no
NAEGRscaffold_6	261796	261814	-	18	NAEGRDRAFT_78383	predicted protein	ena	no
NAEGRscaffold_6	88227	88255	-	28	NAEGRDRAFT_77238	PCI domain-containing protein	ena	no
NAEGRscaffold_6	63981	64684	+	703	NAEGRDRAFT_78356	predicted protein	ena	no
NAEGRscaffold_6	610447	610480	+	33	NAEGRDRAFT_78436	chymotrypsin	ena	no
NAEGRscaffold_6	492049	492062	+	13	NAEGRDRAFT_78412	nucleoporin nup93	ena	no
NAEGRscaffold_6	455221	455308	-	87	NAEGRDRAFT_57003	wasp family protein	ena	no
NAEGRscaffold_6	232689	232887	+	198	NAEGRDRAFT_78378	hypothetical protein	ena	yes
NAEGRscaffold_6	518473	518644	-	171	NAEGRDRAFT_35397	GCN5L1 domain-containing protein	ena	no
NAEGRscaffold_6	680721	680820	+	99	NAEGRDRAFT_57031	predicted protein	ena	no
NAEGRscaffold_6	445868	445892	-	24	NAEGRDRAFT_35388	TATA-binding protein-associated factor 172	ena	no
NAEGRscaffold_6	393655	393706	-	51	NAEGRDRAFT_56999	WD40 repeat domain-containing protein	ena	no
NAEGRscaffold_6	218309	218383	+	74	NAEGRDRAFT_78373	hypothetical protein	ena	no
NAEGRscaffold_6	218449	218484	-	35	NAEGRDRAFT_77240	6-phosphogluconate dehydrogenase	ena	no
NAEGRscaffold_6	542232	542259	+	27	NAEGRDRAFT_78425	predicted protein	ena	no
NAEGRscaffold_6	608457	608469	+	12	NAEGRDRAFT_78435	hypothetical protein	ena	no
NAEGRscaffold_6	85473	85490	+	17	NAEGRDRAFT_55628	hypothetical protein	ena	no
NAEGRscaffold_6	619275	619281	+	6	NAEGRDRAFT_57026	ferrochelatase	ena	no
NAEGRscaffold_6	369131	369165	+	34	NAEGRDRAFT_35379	sedlin-domain-containing protein	ena	no
NAEGRscaffold_6	519095	519101	-	6	NAEGRDRAFT_78419	predicted protein	ena	no
NAEGRscaffold_6	600996	601096	-	100	NAEGRDRAFT_78434	phosphoesterase	ena	no
NAEGRscaffold_6	152126	152162	+	36	NAEGRDRAFT_56976	predicted protein	ena	no
NAEGRscaffold_6	355954	355980	+	26	NAEGRDRAFT_78396	RCC1 domain-containing protein	ena	no
NAEGRscaffold_6	152124	152162	-	38	NAEGRDRAFT_82964	casein kinase	ena	no
NAEGRscaffold_6	464760	464789	-	29	NAEGRDRAFT_57004	predicted protein	ena	no
NAEGRscaffold_6	563578	563595	+	17	NAEGRDRAFT_78429	sec7 domain family member	ena	no
NAEGRscaffold_6	645007	645968	-	961	NAEGRDRAFT_78439	hypothetical protein	ena	no
NAEGRscaffold_6	55873	55891	+	18	NAEGRDRAFT_78355	predicted protein	ena	no
NAEGRscaffold_9	592191	592208	+	17	NAEGRDRAFT_57261	flightless	ena	no
NAEGRscaffold_9	262049	262116	-	67	NAEGRDRAFT_78686	chaperonin subunit delta	ena	no
NAEGRscaffold_9	267472	267492	-	20	NAEGRDRAFT_35674	glycosyl transferase	ena	no
NAEGRscaffold_9	315041	315059	-	18	NAEGRDRAFT_78695	3'5'-cyclic nucleotide phosphodiesterase family protein	ena	no
NAEGRscaffold_9	602605	602821	-	216	NAEGRDRAFT_78745	hypothetical protein	ena	no
NAEGRscaffold_9	71263	71280	+	17	NAEGRDRAFT_78664	hypothetical protein	ena	no
NAEGRscaffold_9	280066	280090	+	24	NAEGRDRAFT_78691	hypothetical protein	ena	no
NAEGRscaffold_9	231036	231052	+	16	NAEGRDRAFT_78680	glycerol kinase	ena	no
NAEGRscaffold_9	145761	145914	-	153	NAEGRDRAFT_78669	sap DNA-binding domain-containing protein	ena	no
NAEGRscaffold_9	535117	535193	-	76	NAEGRDRAFT_78730	hypothetical protein	ena	no
NAEGRscaffold_9	273620	273644	-	24	NAEGRDRAFT_83001	chaperone-t-complex eta subunit	ena	no
NAEGRscaffold_9	550129	550150	-	21	NAEGRDRAFT_55158	predicted protein	ena	no
NAEGRscaffold_9	493158	493165	+	7	NAEGRDRAFT_78724	phosphatase	ena	no
NAEGRscaffold_9	260976	260996	+	20	NAEGRDRAFT_78685	hypothetical protein	ena	no
NAEGRscaffold_9	433293	433316	-	23	NAEGRDRAFT_78714	dihydroorotate dehydrogenase family protein	ena	no
NAEGRscaffold_9	454866	454885	-	19	NAEGRDRAFT_57243	PAS domain-containing protein	ena	no
NAEGRscaffold_9	419738	419823	-	85	NAEGRDRAFT_78711	penicillin amidase family protein	ena	no
NAEGRscaffold_9	567440	567483	+	43	NAEGRDRAFT_78737	acyl-CoA synthase	ena	no
NAEGRscaffold_9	216221	216245	+	24	NAEGRDRAFT_38157	ribose-5-phosphate isomerase	ena	no
NAEGRscaffold_9	441963	441977	-	14	NAEGRDRAFT_78715	predicted protein	ena	no
NAEGRscaffold_9	374916	374977	+	61	NAEGRDRAFT_78703	clathrin heavy chain	ena	no
NAEGRscaffold_9	34608	34793	-	185	NAEGRDRAFT_78660	microcystin-dependent protein	ena	no
NAEGRscaffold_9	410189	410208	+	19	NAEGRDRAFT_55664	vacuolar ATP synthase subunit B	ena	no
NAEGRscaffold_9	215480	215508	+	28	NAEGRDRAFT_78678	ubiquitin protein ligase	ena	no
NAEGRscaffold_9	550090	550162	+	72	NAEGRDRAFT_78733	hypothetical protein	ena	no
NAEGRscaffold_9	669387	669413	-	26	NAEGRDRAFT_78753	predicted protein	ena	no
NAEGRscaffold_9	293177	293228	+	51	NAEGRDRAFT_35679	pyrophosphate-dependent phosphofructo-1-kinase	ena	no
NAEGRscaffold_9	457965	458506	+	541	NAEGRDRAFT_78718	hypothetical protein	ena	yes
NAEGRscaffold_9	334780	334814	+	34	NAEGRDRAFT_35692	60S ribosomal protein L13	ena	no
NAEGRscaffold_9	247234	247273	+	39	NAEGRDRAFT_78684	serine/threonine protein kinase	ena	no
NAEGRscaffold_9	147631	147713	-	82	NAEGRDRAFT_78670	predicted protein	ena	no
NAEGRscaffold_9	656682	656715	+	33	NAEGRDRAFT_57266	hypothetical protein	ena	no
NAEGRscaffold_9	323816	323904	+	88	NAEGRDRAFT_77267	mitochondrial F-1-ATPase subunit	ena	no
NAEGRscaffold_9	265527	265607	-	80	NAEGRDRAFT_57215	predicted protein	ena	no
NAEGRscaffold_9	357814	357830	-	16	NAEGRDRAFT_78701	WD40 repeat domain-containing protein	ena	no
NAEGRscaffold_9	196478	196530	+	52	NAEGRDRAFT_78676	vWFA domain-containing protein	ena	no
NAEGRscaffold_9	389652	389668	+	16	NAEGRDRAFT_78704	hypothetical protein	ena	no
NAEGRscaffold_9	574153	574173	-	20	NAEGRDRAFT_78739	predicted protein	ena	no
NAEGRscaffold_9	668661	668741	+	80	NAEGRDRAFT_78752	hypothetical protein	ena	no
NAEGRscaffold_9	80968	80996	-	28	NAEGRDRAFT_78666	predicted protein	ena	no
NAEGRscaffold_9	51885	51920	-	35	NAEGRDRAFT_57196	DNA dependent protein kinase catalytic subunit	ena	no
NAEGRscaffold_9	576797	576816	+	19	NAEGRDRAFT_78740	hypothetical protein	ena	no
NAEGRscaffold_9	33992	34049	+	57	NAEGRDRAFT_78658	ankyrin repeat domain-containing protein	ena	no
NAEGRscaffold_9	298608	298671	+	63	NAEGRDRAFT_57221	DIRP domain-containing protein	ena	no
NAEGRscaffold_9	162101	162121	-	20	NAEGRDRAFT_78672	hypothetical protein	ena	no
NAEGRscaffold_9	554752	554934	-	182	NAEGRDRAFT_78735	predicted protein	ena	no
NAEGRscaffold_9	518196	518219	+	23	NAEGRDRAFT_57251	rho guanine nucleotide exchange factor	ena	no
NAEGRscaffold_9	412863	412889	-	26	NAEGRDRAFT_78709	hypothetical protein	ena	no
NAEGRscaffold_9	404503	404548	-	45	NAEGRDRAFT_78707	hypothetical protein	ena	no
NAEGRscaffold_9	270837	270860	-	23	NAEGRDRAFT_57217	hypothetical protein	ena	no
NAEGRscaffold_9	482337	482395	-	58	NAEGRDRAFT_55154	hypothetical protein	ena	no
NAEGRscaffold_9	65777	65844	-	67	NAEGRDRAFT_78663	adaptor-related protein complex 3 protein beta subunit	ena	no
NAEGRscaffold_9	396393	396410	-	17	NAEGRDRAFT_78706	importin alpha	ena	no
NAEGRscaffold_9	343375	343403	-	28	NAEGRDRAFT_78700	hypothetical protein	ena	no
NAEGRscaffold_9	583064	583114	+	50	NAEGRDRAFT_35738	predicted protein	ena	no
NAEGRscaffold_9	427199	427215	+	16	NAEGRDRAFT_78712	clathrin-adaptor gamma chain	ena	no
NAEGRscaffold_9	173220	173360	+	140	NAEGRDRAFT_35653	histone H2A	ena	no
NAEGRscaffold_9	474806	474843	+	37	NAEGRDRAFT_57247	hypothetical protein	ena	no
NAEGRscaffold_9	10116	10604	-	488	NAEGRDRAFT_78654	small GTPase	ena	no
NAEGRscaffold_9	27412	27460	-	48	NAEGRDRAFT_78657	fascin domain-containing protein	ena	no
NAEGRscaffold_9	428529	428567	+	38	NAEGRDRAFT_78713	hypothetical protein	ena	no
NAEGRscaffold_9	417645	417729	+	84	NAEGRDRAFT_57236	hypothetical protein	ena	no
NAEGRscaffold_9	465175	465240	-	65	NAEGRDRAFT_35722	calcineurin regulatory subunit B	ena	no
NAEGRscaffold_9	469520	469557	+	37	NAEGRDRAFT_78721	26S proteasome regulatory subunit S1	ena	no
NAEGRscaffold_9	537915	537971	-	56	NAEGRDRAFT_57254	RhoGEF domain-containing protein	ena	no
NAEGRscaffold_9	389664	389988	-	324	NAEGRDRAFT_78705	predicted protein	ena	yes
NAEGRscaffold_9	599070	599095	-	25	NAEGRDRAFT_78743	hypothetical protein	ena	no
NAEGRscaffold_9	543932	544040	+	108	NAEGRDRAFT_78732	hypothetical protein	ena	no
NAEGRscaffold_9	660322	660360	+	38	NAEGRDRAFT_57267	predicted protein	ena	no
NAEGRscaffold_9	611844	611874	+	30	NAEGRDRAFT_78746	PARP-domain-containing protein	ena	no
NAEGRscaffold_9	450275	450319	-	44	NAEGRDRAFT_38214	prolyl-tRNA synthetase	ena	no
NAEGRscaffold_9	242704	242734	+	30	NAEGRDRAFT_57212	hypothetical protein	ena	no
NAEGRscaffold_9	644793	644818	+	25	NAEGRDRAFT_38237	dihydrolipoyl dehydrogenase	ena	no
NAEGRscaffold_9	16802	16860	-	58	NAEGRDRAFT_57192	hypothetical protein	ena	no
NAEGRscaffold_9	360961	360977	-	16	NAEGRDRAFT_57229	hypothetical protein	ena	no
NAEGRscaffold_9	51238	51249	+	11	NAEGRDRAFT_77264	aminoacylase	ena	no
NAEGRscaffold_9	160101	160113	-	12	NAEGRDRAFT_57204	serine/threonine protein kinase	ena	no
NAEGRscaffold_9	189905	189907	+	2	NAEGRDRAFT_78675	predicted protein	ena	no
NAEGRscaffold_9	244034	244479	-	445	NAEGRDRAFT_78683	predicted protein	ena	yes
NAEGRscaffold_9	238813	239350	+	537	NAEGRDRAFT_78681	hypothetical protein	ena	no
NAEGRscaffold_9	313233	313251	+	18	NAEGRDRAFT_78694	coenzyme A transferase family protein	ena	no
NAEGRscaffold_9	463448	463448	-	0	NAEGRDRAFT_78719	hypothetical protein	ena	no
NAEGRscaffold_9	487967	489127	-	1160	NAEGRDRAFT_78723	arsenate reductase	ena	no
NAEGRscaffold_9	532251	532303	-	52	NAEGRDRAFT_78729	abc transporter family protein	ena	no
NAEGRscaffold_9	133210	133227	-	17	NAEGRDRAFT_78668	predicted protein	ena	no
NAEGRscaffold_9	567478	567501	-	23	NAEGRDRAFT_78738	phospholipase D1	ena	no
NAEGRscaffold_9	556705	556770	+	65	NAEGRDRAFT_35731	predicted protein	ena	yes
NAEGRscaffold_9	328249	328306	-	57	NAEGRDRAFT_83004	aspartate aminotransferase	ena	no
NAEGRscaffold_9	628044	628060	+	16	NAEGRDRAFT_57264	hypothetical protein	ena	no
NAEGRscaffold_9	325250	325302	-	52	NAEGRDRAFT_78697	HSP70 family protein	ena	no
NAEGRscaffold_9	168520	168673	+	153	NAEGRDRAFT_57206	predicted protein	ena	no
NAEGRscaffold_7	183188	183372	+	184	NAEGRDRAFT_78467	hypothetical protein	ena	no
NAEGRscaffold_7	524439	524490	+	51	NAEGRDRAFT_56035	alcohol dehydrogenase	ena	no
NAEGRscaffold_7	384009	384036	+	27	NAEGRDRAFT_78502	hypothetical protein	ena	no
NAEGRscaffold_7	358526	358569	+	43	NAEGRDRAFT_78496	ubiquitin-protein ligase	ena	no
NAEGRscaffold_7	52773	52795	-	22	NAEGRDRAFT_57037	major facilitator superfamily protein	ena	no
NAEGRscaffold_7	146644	146956	-	312	NAEGRDRAFT_35428	P21-ARC	ena	no
NAEGRscaffold_7	415199	415212	-	13	NAEGRDRAFT_57086	WD40 repeat domain-containing protein	ena	no
NAEGRscaffold_7	315763	315845	-	82	NAEGRDRAFT_78490	hypothetical protein	ena	no
NAEGRscaffold_7	645556	645584	+	28	NAEGRDRAFT_78548	aspartate aminotransferase	ena	no
NAEGRscaffold_7	320870	320908	+	38	NAEGRDRAFT_78491	ribosome assembly protein BSM1	ena	no
NAEGRscaffold_7	205147	205206	-	59	NAEGRDRAFT_78471	synaptobrevin/VAMP protein	ena	no
NAEGRscaffold_7	414346	414508	-	162	NAEGRDRAFT_78510	predicted protein	ena	no
NAEGRscaffold_7	592690	592701	-	11	NAEGRDRAFT_57108	hypothetical protein	ena	no
NAEGRscaffold_7	151656	151681	-	25	NAEGRDRAFT_82976	5-oxoprolinase	ena	no
NAEGRscaffold_7	517042	517090	-	48	NAEGRDRAFT_77250	hypothetical protein	ena	no
NAEGRscaffold_7	215109	215128	-	19	NAEGRDRAFT_78473	hypothetical protein	ena	no
NAEGRscaffold_7	219136	219173	+	37	NAEGRDRAFT_78474	hypothetical protein	ena	no
NAEGRscaffold_7	176130	176170	-	40	NAEGRDRAFT_35433	rotamase domain-containing protein	ena	no
NAEGRscaffold_7	543849	544279	-	430	NAEGRDRAFT_77253	methionine aminopeptidase	ena	yes
NAEGRscaffold_7	55461	55499	-	38	NAEGRDRAFT_57038	hypothetical protein	ena	no
NAEGRscaffold_7	243869	243895	-	26	NAEGRDRAFT_78479	taurine dioxygenase	ena	no
NAEGRscaffold_7	454106	454131	-	25	NAEGRDRAFT_78517	fimbrin	ena	no
NAEGRscaffold_7	97624	97639	+	15	NAEGRDRAFT_78456	hypothetical protein	ena	no
NAEGRscaffold_7	298565	298579	+	14	NAEGRDRAFT_78487	aminotransferase	ena	no
NAEGRscaffold_7	561003	561024	+	21	NAEGRDRAFT_78535	hypothetical protein	ena	no
NAEGRscaffold_7	630359	630642	+	283	NAEGRDRAFT_78545	protein kinase	ena	no
NAEGRscaffold_7	642204	642235	-	31	NAEGRDRAFT_78547	hypothetical protein	ena	no
NAEGRscaffold_7	69609	69649	+	40	NAEGRDRAFT_78453	glycosyl transferase	ena	no
NAEGRscaffold_7	461666	461686	-	20	NAEGRDRAFT_78518	N-acetyltransferase	ena	no
NAEGRscaffold_7	471315	471336	-	21	NAEGRDRAFT_78519	abc transporter B family protein	ena	no
NAEGRscaffold_7	487337	487352	-	15	NAEGRDRAFT_78524	rasGEF domain-containing protein	ena	no
NAEGRscaffold_7	435796	435842	+	46	NAEGRDRAFT_82475	hypothetical protein	ena	yes
NAEGRscaffold_7	511899	511919	+	20	NAEGRDRAFT_78526	polyubiquitin	ena	no
NAEGRscaffold_7	241766	241796	+	30	NAEGRDRAFT_78478	hypothetical protein	ena	no
NAEGRscaffold_7	20238	20319	-	81	NAEGRDRAFT_57034	hypothetical protein	ena	no
NAEGRscaffold_7	287470	288491	+	1021	NAEGRDRAFT_57066	RRM domain-containing protein	ena	yes
NAEGRscaffold_7	409496	409513	+	17	NAEGRDRAFT_78509	dihydrolipoamide branched chain transacylase E2	ena	no
NAEGRscaffold_7	363730	363732	-	2	NAEGRDRAFT_78498	leucine rich repeat protein	ena	no
NAEGRscaffold_7	201506	201672	-	166	NAEGRDRAFT_78469	NADH-ubiquinone oxidoreductase	ena	yes
NAEGRscaffold_7	84582	84589	+	7	NAEGRDRAFT_78455	hypothetical protein	ena	no
NAEGRscaffold_7	400024	400085	-	61	NAEGRDRAFT_78506	kinesin-1	ena	no
NAEGRscaffold_7	333926	334045	-	119	NAEGRDRAFT_57071	hypothetical protein	ena	no
NAEGRscaffold_7	58263	58410	-	147	NAEGRDRAFT_57039	hypothetical protein	ena	no
NAEGRscaffold_7	606757	606801	-	44	NAEGRDRAFT_78541	protein kinase	ena	no
NAEGRscaffold_7	257967	258065	+	98	NAEGRDRAFT_78482	morn repeat-containing protein	ena	no
NAEGRscaffold_7	512795	512828	+	33	NAEGRDRAFT_57099	nascent polypeptide-associated complex alpha subunit	ena	no
NAEGRscaffold_7	583469	583488	-	19	NAEGRDRAFT_38007	cyclophilin	ena	no
NAEGRscaffold_7	220764	220802	+	38	NAEGRDRAFT_78475	MAC/Perforin domain-containing protein	ena	no
NAEGRscaffold_7	345903	345942	+	39	NAEGRDRAFT_37962	2-oxoglutarate dehydrogenase	ena	no
NAEGRscaffold_7	580747	580766	-	19	NAEGRDRAFT_78537	predicted protein	ena	no
NAEGRscaffold_7	260983	261002	+	19	NAEGRDRAFT_37946	hect E3 ubiquitin ligase	ena	no
NAEGRscaffold_7	495581	495682	+	101	NAEGRDRAFT_78525	hypothetical protein	ena	no
NAEGRscaffold_7	247930	247963	-	33	NAEGRDRAFT_82977	HSP70 family protein	ena	no
NAEGRscaffold_7	116558	116600	+	42	NAEGRDRAFT_57045	predicted protein	ena	no
NAEGRscaffold_7	108311	108373	-	62	NAEGRDRAFT_78457	subtiliase family serine protease	ena	yes
NAEGRscaffold_7	592598	592648	+	50	NAEGRDRAFT_38010	rho family small GTPase	ena	no
NAEGRscaffold_7	482556	483159	+	603	NAEGRDRAFT_78522	hypothetical protein	ena	no
NAEGRscaffold_7	189854	189901	-	47	NAEGRDRAFT_78468	hypothetical protein	ena	no
NAEGRscaffold_7	429100	429442	+	342	NAEGRDRAFT_78513	hypothetical protein	ena	no
NAEGRscaffold_7	612687	612703	+	16	NAEGRDRAFT_78542	hypothetical protein	ena	no
NAEGRscaffold_7	167396	167457	-	61	NAEGRDRAFT_78464	hypothetical protein	ena	no
NAEGRscaffold_7	310235	310352	+	117	NAEGRDRAFT_78488	pyruvate kinase	ena	yes
NAEGRscaffold_7	346156	346215	-	59	NAEGRDRAFT_82980	serine/threonine protein kinase	ena	no
NAEGRscaffold_7	407694	407725	+	31	NAEGRDRAFT_35477	phosphatase	ena	no
NAEGRscaffold_7	619110	619126	+	16	NAEGRDRAFT_78543	transmembrane protein 131	ena	no
NAEGRscaffold_7	680877	680973	-	96	NAEGRDRAFT_78553	hypothetical protein	ena	no
NAEGRscaffold_7	315665	315708	+	43	NAEGRDRAFT_78489	mads box domain-containing protein	ena	yes
NAEGRscaffold_7	391163	391181	-	18	NAEGRDRAFT_78504	splicing factor	ena	no
NAEGRscaffold_7	551746	551813	-	67	NAEGRDRAFT_78534	hypothetical protein	ena	yes
NAEGRscaffold_7	126828	127048	+	220	NAEGRDRAFT_57046	amidohydrolase family protein	ena	yes
NAEGRscaffold_7	366537	366546	-	9	NAEGRDRAFT_57076	hypothetical protein	ena	no
NAEGRscaffold_7	375043	375063	+	20	NAEGRDRAFT_35474	peptidase	ena	no
NAEGRscaffold_7	369853	369994	+	141	NAEGRDRAFT_78500	hypothetical protein	ena	no
NAEGRscaffold_7	622119	622133	-	14	NAEGRDRAFT_78544	hypothetical protein	ena	no
NAEGRscaffold_7	477311	477618	-	307	NAEGRDRAFT_78521	hypothetical protein	ena	yes
NAEGRscaffold_7	203289	203316	+	27	NAEGRDRAFT_78470	60S ribosomal protein L22	ena	no
NAEGRscaffold_7	539007	539100	+	93	NAEGRDRAFT_78532	hypothetical protein	ena	no
NAEGRscaffold_7	651414	651443	+	29	NAEGRDRAFT_78549	serine/threonine kinase	ena	no
NAEGRscaffold_7	394889	394912	-	23	NAEGRDRAFT_57082	hypothetical protein	ena	no
NAEGRscaffold_7	427380	427417	+	37	NAEGRDRAFT_78512	hypothetical protein	ena	no
NAEGRscaffold_7	530889	530997	-	108	NAEGRDRAFT_78531	hypothetical protein	ena	no
NAEGRscaffold_7	73885	73900	+	15	NAEGRDRAFT_78454	leucine-rich repeat family protein	ena	no
NAEGRscaffold_7	661310	661330	-	20	NAEGRDRAFT_78552	hypothetical protein	ena	no
NAEGRscaffold_7	402567	402589	-	22	NAEGRDRAFT_78507	endonuclease G	ena	no
NAEGRscaffold_10	187915	187937	-	22	NAEGRDRAFT_56056	polyubiquitin	ena	no
NAEGRscaffold_10	336929	336967	-	38	NAEGRDRAFT_78810	hypothetical protein	ena	no
NAEGRscaffold_10	232537	232582	+	45	NAEGRDRAFT_35785	60S ribosomal protein L2	ena	no
NAEGRscaffold_10	617229	617264	-	35	NAEGRDRAFT_57327	predicted protein	ena	no
NAEGRscaffold_10	577496	577507	+	11	NAEGRDRAFT_78827	ADP-ribosylation/crystallin	ena	no
NAEGRscaffold_10	252995	253068	-	73	NAEGRDRAFT_78790	hypothetical protein	ena	no
NAEGRscaffold_10	641966	642092	+	126	NAEGRDRAFT_78837	phosphate transporter	ena	no
NAEGRscaffold_10	643147	643229	+	82	NAEGRDRAFT_78838	hypothetical protein	ena	no
NAEGRscaffold_10	244446	244517	-	71	NAEGRDRAFT_35787	phosphatidylinositol 3-kinase	ena	no
NAEGRscaffold_10	596527	596712	-	185	NAEGRDRAFT_78830	predicted protein	ena	no
NAEGRscaffold_10	99623	99693	-	70	NAEGRDRAFT_57277	ankyrin repeat domain-containing protein	ena	no
NAEGRscaffold_10	224974	224990	+	16	NAEGRDRAFT_38279	dipeptidylpeptidase	ena	no
NAEGRscaffold_10	278933	278967	-	34	NAEGRDRAFT_57299	leucine rich repeat domain-containing protein	ena	yes
NAEGRscaffold_10	202461	202701	+	240	NAEGRDRAFT_78780	hypothetical protein	ena	no
NAEGRscaffold_10	215474	215491	-	17	NAEGRDRAFT_78784	homeobox transcription factor	ena	no
NAEGRscaffold_10	510584	510798	+	214	NAEGRDRAFT_78818	hypothetical protein	ena	no
NAEGRscaffold_10	66480	66507	+	27	NAEGRDRAFT_83014	26S proteasome regulatory subunit S2	ena	no
NAEGRscaffold_10	379561	380039	-	478	NAEGRDRAFT_78813	hypothetical protein	ena	yes
NAEGRscaffold_10	46903	46964	+	61	NAEGRDRAFT_78760	lysine decarboxylase	ena	no
NAEGRscaffold_10	367836	367963	-	127	NAEGRDRAFT_78812	Rh-like glycoprotein	ena	no
NAEGRscaffold_10	142310	142350	+	40	NAEGRDRAFT_78770	cullin	ena	no
NAEGRscaffold_10	290011	290159	+	148	NAEGRDRAFT_78800	predicted protein	ena	no
NAEGRscaffold_10	324035	324083	+	48	NAEGRDRAFT_78807	predicted protein	ena	no
NAEGRscaffold_10	90389	90427	-	38	NAEGRDRAFT_78765	hypothetical protein	ena	no
NAEGRscaffold_10	625795	625915	+	120	NAEGRDRAFT_57330	hypothetical protein	ena	no
NAEGRscaffold_10	126201	126237	-	36	NAEGRDRAFT_78768	hypothetical protein	ena	no
NAEGRscaffold_10	247509	247646	-	137	NAEGRDRAFT_57294	phosphatidylinositol-4-phosphate 5-kinase	ena	no
NAEGRscaffold_10	205786	205802	-	16	NAEGRDRAFT_57288	chromatin assembly factor-1 p105 subunit	ena	no
NAEGRscaffold_10	154345	154366	-	21	NAEGRDRAFT_83016	myohemerythrin	ena	no
NAEGRscaffold_10	524343	524477	+	134	NAEGRDRAFT_78821	guanylate binding protein	ena	no
NAEGRscaffold_10	255443	255608	-	165	NAEGRDRAFT_78792	predicted protein	ena	no
NAEGRscaffold_10	622124	622180	+	56	NAEGRDRAFT_57329	N-hydroxycinnamoyl/benzoyltransferase	ena	no
NAEGRscaffold_10	208629	208642	-	13	NAEGRDRAFT_78783	ribosome biogenesis regulatory protein	ena	no
NAEGRscaffold_10	143708	143787	-	79	NAEGRDRAFT_78771	RGS domain-containing protein	ena	no
NAEGRscaffold_10	317735	317748	+	13	NAEGRDRAFT_78805	anaerobic glycerol-3-phosphate dehydrogenase subunit C	ena	no
NAEGRscaffold_10	406194	406220	+	26	NAEGRDRAFT_78815	dedicator of cytokinesis 5	ena	no
NAEGRscaffold_10	324049	324079	-	30	NAEGRDRAFT_57308	hypothetical protein	ena	no
NAEGRscaffold_10	44025	45111	+	1086	NAEGRDRAFT_78758	hypothetical protein	ena	no
NAEGRscaffold_10	49086	49194	+	108	NAEGRDRAFT_78761	serine/threonine kinase	ena	no
NAEGRscaffold_10	159717	159757	+	40	NAEGRDRAFT_35757	sec13 protein	ena	no
NAEGRscaffold_10	103454	103474	-	20	NAEGRDRAFT_78767	hypothetical protein	ena	no
NAEGRscaffold_10	311851	311898	+	47	NAEGRDRAFT_57304	predicted protein	ena	no
NAEGRscaffold_10	313972	314166	+	194	NAEGRDRAFT_78804	predicted protein	ena	no
NAEGRscaffold_10	492082	492163	-	81	NAEGRDRAFT_78817	ubiquinol-cytochrome c reductase iron-sulfur subunit mitochondrial precursor	ena	no
NAEGRscaffold_10	293458	293478	-	20	NAEGRDRAFT_78801	abc transporter B family protein	ena	no
NAEGRscaffold_10	484959	484979	+	20	NAEGRDRAFT_78816	hypothetical protein	ena	no
NAEGRscaffold_10	553026	553089	+	63	NAEGRDRAFT_78824	lysosomal/endosomal membrane protein p67	ena	no
NAEGRscaffold_10	618674	618728	-	54	NAEGRDRAFT_82503	predicted protein	ena	no
NAEGRscaffold_10	203989	204004	-	15	NAEGRDRAFT_78781	diacylglycerol kinase	ena	no
NAEGRscaffold_10	511785	511835	+	50	NAEGRDRAFT_57317	hypothetical protein	ena	no
NAEGRscaffold_10	317727	317739	-	12	NAEGRDRAFT_78806	predicted protein	ena	no
NAEGRscaffold_10	634317	634484	+	167	NAEGRDRAFT_57331	adenylate cyclase	ena	no
NAEGRscaffold_10	169221	169256	-	35	NAEGRDRAFT_78775	glutamate dehydrogenase	ena	no
NAEGRscaffold_10	332994	333081	+	87	NAEGRDRAFT_57309	rasGEF domain-containing protein	ena	no
NAEGRscaffold_10	513875	513927	-	52	NAEGRDRAFT_78820	phosphoglyceride transfer protein	ena	no
NAEGRscaffold_10	77618	77633	+	15	NAEGRDRAFT_57275	hypothetical protein	ena	no
NAEGRscaffold_10	349584	349602	-	18	NAEGRDRAFT_78811	predicted protein	ena	no
NAEGRscaffold_10	189559	189613	-	54	NAEGRDRAFT_57286	alpha tubulin suppressor family protein	ena	no
NAEGRscaffold_10	584313	584339	-	26	NAEGRDRAFT_78828	serine/threonine protein kinase	ena	no
NAEGRscaffold_10	164398	164667	-	269	NAEGRDRAFT_57283	hypothetical protein	ena	no
NAEGRscaffold_10	305018	305041	-	23	NAEGRDRAFT_55676	cystathionine gamma-lyase	ena	no
NAEGRscaffold_10	231558	231679	+	121	NAEGRDRAFT_78786	hypothetical protein	ena	no
NAEGRscaffold_10	299268	299278	+	10	NAEGRDRAFT_78802	hypothetical protein	ena	no
NAEGRscaffold_10	30807	30836	+	29	NAEGRDRAFT_57269	hypothetical protein	ena	no
NAEGRscaffold_10	538925	538953	+	28	NAEGRDRAFT_78822	60S ribosomal protein L21	ena	no
NAEGRscaffold_10	270094	270111	+	17	NAEGRDRAFT_78794	cytochrome p450	ena	no
NAEGRscaffold_10	613034	613150	+	116	NAEGRDRAFT_78831	CAMK family protein kinase	ena	no
NAEGRscaffold_10	649055	649080	-	25	NAEGRDRAFT_57333	hypothetical protein	ena	no
NAEGRscaffold_10	542791	542806	+	15	NAEGRDRAFT_78823	hypothetical protein	ena	no
NAEGRscaffold_10	650096	650134	-	38	NAEGRDRAFT_57334	hypothetical protein	ena	no
NAEGRscaffold_10	274549	274574	+	25	NAEGRDRAFT_57298	hypothetical protein	ena	no
NAEGRscaffold_10	558913	558943	-	30	NAEGRDRAFT_78825	RCC1 domain-containing protein	ena	no
NAEGRscaffold_10	285124	286120	-	996	NAEGRDRAFT_57301	hypothetical protein	ena	no
NAEGRscaffold_10	595016	595071	-	55	NAEGRDRAFT_78829	peptidase T	ena	no
NAEGRscaffold_11	93116	93150	-	34	NAEGRDRAFT_57343	hypothetical protein	ena	no
NAEGRscaffold_11	283490	283501	-	11	NAEGRDRAFT_78876	hypothetical protein	ena	no
NAEGRscaffold_11	427811	427827	-	16	NAEGRDRAFT_78893	60S acidic ribosomal protein	ena	no
NAEGRscaffold_11	19241	19252	+	11	NAEGRDRAFT_78842	hypothetical protein	ena	no
NAEGRscaffold_11	422018	422196	-	178	NAEGRDRAFT_78892	tRNA isopentenyltransferase	ena	no
NAEGRscaffold_11	506162	506291	-	129	NAEGRDRAFT_57391	actin-related protein ARP3	ena	no
NAEGRscaffold_11	499791	499834	+	43	NAEGRDRAFT_78906	predicted protein	ena	no
NAEGRscaffold_11	584523	585273	+	750	NAEGRDRAFT_78918	hypothetical protein	ena	no
NAEGRscaffold_11	508328	508408	-	80	NAEGRDRAFT_57392	chromate ion transporter family protein	ena	no
NAEGRscaffold_11	52661	52974	+	313	NAEGRDRAFT_77285	uridine kinase family protein	ena	yes
NAEGRscaffold_11	255497	255617	-	120	NAEGRDRAFT_78869	hypothetical protein	ena	no
NAEGRscaffold_11	2420	2458	-	38	NAEGRDRAFT_57335	RGS domain-containing protein	ena	no
NAEGRscaffold_11	71637	71663	-	26	NAEGRDRAFT_78848	eukaryotic translation initiation factor 3	ena	no
NAEGRscaffold_11	528453	528510	-	57	NAEGRDRAFT_78911	hypothetical protein	ena	no
NAEGRscaffold_11	472530	472888	+	358	NAEGRDRAFT_78900	rho family small GTPase	ena	no
NAEGRscaffold_11	568484	568518	+	34	NAEGRDRAFT_78914	laminin A family protein	ena	no
NAEGRscaffold_11	256344	256370	-	26	NAEGRDRAFT_78870	WD40 repeat domain-containing protein	ena	no
NAEGRscaffold_11	589708	589896	+	188	NAEGRDRAFT_78919	penicillin amidase	ena	no
NAEGRscaffold_11	387898	387941	+	43	NAEGRDRAFT_78889	vacuolar sorting protein	ena	yes
NAEGRscaffold_11	113719	113764	-	45	NAEGRDRAFT_83028	24-sterol C methyltransferase	ena	no
NAEGRscaffold_11	281819	281844	-	25	NAEGRDRAFT_56065	alpha-tubulin	ena	no
NAEGRscaffold_11	129437	129787	-	350	NAEGRDRAFT_78856	predicted protein	ena	no
NAEGRscaffold_11	229814	229927	+	113	NAEGRDRAFT_78867	hypothetical protein	ena	no
NAEGRscaffold_11	173604	173622	-	18	NAEGRDRAFT_57352	predicted protein	ena	no
NAEGRscaffold_11	346629	346653	+	24	NAEGRDRAFT_78882	hypothetical protein	ena	no
NAEGRscaffold_11	358838	358870	-	32	NAEGRDRAFT_78884	hypothetical protein	ena	no
NAEGRscaffold_11	222030	222050	+	20	NAEGRDRAFT_35860	isoleucyl-tRNA synthetase	ena	no
NAEGRscaffold_11	362576	362660	+	84	NAEGRDRAFT_78885	hypothetical protein	ena	no
NAEGRscaffold_11	112600	112609	+	9	NAEGRDRAFT_57344	hypothetical protein	ena	no
NAEGRscaffold_11	53240	53563	-	323	NAEGRDRAFT_78847	ATP-dependent RNA helicase	ena	no
NAEGRscaffold_11	455847	455868	-	21	NAEGRDRAFT_78897	glycosyl transferase family protein	ena	no
NAEGRscaffold_11	583044	583049	+	5	NAEGRDRAFT_78916	NBP family basal body protein	ena	no
NAEGRscaffold_11	383182	383206	+	24	NAEGRDRAFT_57375	hypothetical protein	ena	no
NAEGRscaffold_11	191816	191866	-	50	NAEGRDRAFT_78863	co-chaperone p23 domain-containing protein	ena	no
NAEGRscaffold_11	262723	262724	+	1	NAEGRDRAFT_78872	predicted protein	ena	no
NAEGRscaffold_11	480973	480999	+	26	NAEGRDRAFT_78904	hypothetical protein	ena	no
NAEGRscaffold_11	478394	478415	-	21	NAEGRDRAFT_35893	ubiquitin conjugating enzyme E2	ena	no
NAEGRscaffold_11	459746	459784	-	38	NAEGRDRAFT_78898	rhoGEF domain-containing protein	ena	no
NAEGRscaffold_11	320385	320397	+	12	NAEGRDRAFT_77293	WD40 repeat domain-containing protein	ena	no
NAEGRscaffold_11	494683	494713	-	30	NAEGRDRAFT_57389	hypothetical protein	ena	no
NAEGRscaffold_11	195098	195118	-	20	NAEGRDRAFT_78864	hypothetical protein	ena	no
NAEGRscaffold_11	276361	277299	-	938	NAEGRDRAFT_78874	hypothetical protein	ena	no
NAEGRscaffold_11	468059	468072	-	13	NAEGRDRAFT_78899	major facilitator superfamily protein	ena	no
NAEGRscaffold_11	180316	180348	-	32	NAEGRDRAFT_57354	basal body protein NBP family	ena	no
NAEGRscaffold_11	115253	115284	-	31	NAEGRDRAFT_78855	hypothetical protein	ena	no
NAEGRscaffold_11	84368	84389	-	21	NAEGRDRAFT_57342	hypothetical protein	ena	no
NAEGRscaffold_11	240389	240513	-	124	NAEGRDRAFT_57360	predicted protein	ena	no
NAEGRscaffold_11	293730	293770	+	40	NAEGRDRAFT_38363	hypothetical protein	ena	no
NAEGRscaffold_11	528383	528415	+	32	NAEGRDRAFT_78910	hypothetical protein	ena	no
NAEGRscaffold_11	455864	455886	+	22	NAEGRDRAFT_78896	tRNA nucleotidyltransferase/poly(A) polymerase	ena	no
NAEGRscaffold_11	26576	26827	-	251	NAEGRDRAFT_78844	cdc2-related protein kinase	ena	yes
NAEGRscaffold_11	292595	292709	+	114	NAEGRDRAFT_78877	hypothetical protein	ena	no
NAEGRscaffold_11	176324	176358	-	34	NAEGRDRAFT_78861	histidine ammonia lyase	ena	no
NAEGRscaffold_11	260555	260820	+	265	NAEGRDRAFT_78871	nuclear prelamin A recognition factor	ena	no
NAEGRscaffold_11	367630	367666	-	36	NAEGRDRAFT_78887	hypothetical protein	ena	no
NAEGRscaffold_11	365196	365217	-	21	NAEGRDRAFT_78886	tubulin tyrosine ligase	ena	no
NAEGRscaffold_11	163457	163486	+	29	NAEGRDRAFT_38348	exportin-1	ena	no
NAEGRscaffold_11	448871	448901	-	30	NAEGRDRAFT_78895	rho GTPase activating protein	ena	no
NAEGRscaffold_11	90709	90758	+	49	NAEGRDRAFT_78851	TATA-box binding protein	ena	no
NAEGRscaffold_11	201209	201226	+	17	NAEGRDRAFT_57357	hypothetical protein	ena	no
NAEGRscaffold_11	304385	304458	+	73	NAEGRDRAFT_56069	gamma-tubulin	ena	no
NAEGRscaffold_11	136515	136534	-	19	NAEGRDRAFT_38344	tyrosyl-tRNA synthetase	ena	no
NAEGRscaffold_12	273133	273184	+	51	NAEGRDRAFT_38428	predicted protein	ena	no
NAEGRscaffold_12	472174	472191	-	17	NAEGRDRAFT_38446	predicted protein	ena	no
NAEGRscaffold_12	552416	552517	+	101	NAEGRDRAFT_78985	predicted protein	ena	yes
NAEGRscaffold_12	216281	216325	+	44	NAEGRDRAFT_57422	EF-hand domain-containing protein	ena	no
NAEGRscaffold_12	141934	141952	-	18	NAEGRDRAFT_78942	alpha subunit of protein prenyltransferase	ena	no
NAEGRscaffold_12	576879	576905	-	26	NAEGRDRAFT_82519	oxidoreductase	ena	no
NAEGRscaffold_12	365981	366071	+	90	NAEGRDRAFT_78962	predicted protein	ena	yes
NAEGRscaffold_12	406227	406294	+	67	NAEGRDRAFT_78967	TLDc domain-containing protein	ena	no
NAEGRscaffold_12	520402	521045	-	643	NAEGRDRAFT_78980	ras small GTPase	ena	no
NAEGRscaffold_12	134198	134213	-	15	NAEGRDRAFT_78939	hypothetical protein	ena	no
NAEGRscaffold_12	3135	3155	+	20	NAEGRDRAFT_57399	SEL1 repeat domain-containing protein	ena	no
NAEGRscaffold_12	322876	322933	-	57	NAEGRDRAFT_78957	hypothetical protein	ena	no
NAEGRscaffold_12	486378	486856	+	478	NAEGRDRAFT_78975	FtsX domain-containing protein	ena	no
NAEGRscaffold_12	96699	96736	+	37	NAEGRDRAFT_57411	hypothetical protein	ena	no
NAEGRscaffold_12	50957	51077	-	120	NAEGRDRAFT_78926	hypothetical protein	ena	no
NAEGRscaffold_12	19852	19857	+	5	NAEGRDRAFT_57403	hypothetical protein	ena	no
NAEGRscaffold_12	340520	340600	+	80	NAEGRDRAFT_78959	serine/threonine protein kinase	ena	no
NAEGRscaffold_12	333863	333879	+	16	NAEGRDRAFT_78958	hypothetical protein	ena	no
NAEGRscaffold_12	41119	41205	-	86	NAEGRDRAFT_78925	TPR repeat domain-containing protein	ena	no
NAEGRscaffold_12	475245	475655	+	410	NAEGRDRAFT_78974	predicted protein	ena	no
NAEGRscaffold_12	9001	9168	-	167	NAEGRDRAFT_78922	hypothetical protein	ena	no
NAEGRscaffold_12	61996	62099	+	103	NAEGRDRAFT_78928	hypothetical protein	ena	no
NAEGRscaffold_12	245813	245857	-	44	NAEGRDRAFT_78952	hypothetical protein	ena	no
NAEGRscaffold_12	140736	140757	-	21	NAEGRDRAFT_78941	hypothetical protein	ena	no
NAEGRscaffold_12	411048	411065	-	17	NAEGRDRAFT_78968	FH2 domain-containing protein	ena	no
NAEGRscaffold_12	459037	459052	-	15	NAEGRDRAFT_57440	hypothetical protein	ena	no
NAEGRscaffold_12	146269	146388	+	119	NAEGRDRAFT_35917	kelch repeat-containing protein	ena	no
NAEGRscaffold_12	372394	372408	+	14	NAEGRDRAFT_78963	peptide N-glycanase	ena	no
NAEGRscaffold_12	139741	139773	-	32	NAEGRDRAFT_38410	60S ribosomal protein L9	ena	no
NAEGRscaffold_12	524919	524950	-	31	NAEGRDRAFT_78984	predicted protein	ena	no
NAEGRscaffold_12	221126	221141	+	15	NAEGRDRAFT_78949	hypothetical protein	ena	yes
NAEGRscaffold_12	455884	456004	+	120	NAEGRDRAFT_57439	hypothetical protein	ena	no
NAEGRscaffold_12	357159	357241	+	82	NAEGRDRAFT_78961	C-5 sterol desaturase	ena	no
NAEGRscaffold_12	113462	113613	+	151	NAEGRDRAFT_78936	hypothetical protein	ena	no
NAEGRscaffold_12	88377	88603	-	226	NAEGRDRAFT_78931	predicted protein	ena	no
NAEGRscaffold_12	81449	81497	+	48	NAEGRDRAFT_78929	Ded_cyto domain-containing protein	ena	no
NAEGRscaffold_12	389922	389939	+	17	NAEGRDRAFT_78965	axonemal dynein intermediate chain protein	ena	no
NAEGRscaffold_12	355604	355776	+	172	NAEGRDRAFT_78960	C-5 sterol desaturase	ena	no
NAEGRscaffold_12	229866	229892	-	26	NAEGRDRAFT_78950	vacuole 14 protein	ena	no
NAEGRscaffold_12	312736	312747	-	11	NAEGRDRAFT_78956	nucleoporin 98-96	ena	no
NAEGRscaffold_12	101144	101160	-	16	NAEGRDRAFT_78934	ubiquitin-like 1 activating enzyme E1B	ena	no
NAEGRscaffold_12	489861	489892	-	31	NAEGRDRAFT_57445	hypothetical protein	ena	no
NAEGRscaffold_12	170600	170706	-	106	NAEGRDRAFT_78944	histone H2A	ena	no
NAEGRscaffold_12	131900	131920	-	20	NAEGRDRAFT_78938	hypothetical protein	ena	no
NAEGRscaffold_12	379886	379923	-	37	NAEGRDRAFT_35944	predicted protein	ena	no
NAEGRscaffold_12	465750	465769	+	19	NAEGRDRAFT_57441	hypothetical protein	ena	no
NAEGRscaffold_12	273300	273311	-	11	NAEGRDRAFT_78955	hypothetical protein	ena	no
NAEGRscaffold_12	109575	109644	+	69	NAEGRDRAFT_78935	peptidase C19 family ubiquitinyl hydrolase	ena	no
NAEGRscaffold_12	237874	237886	+	12	NAEGRDRAFT_83039	lysyl-tRNA synthase	ena	no
NAEGRscaffold_12	51851	51864	-	13	NAEGRDRAFT_78927	hypothetical protein	ena	no
NAEGRscaffold_13	507100	507109	-	9	NAEGRDRAFT_57501	predicted protein	ena	no
NAEGRscaffold_13	306012	306049	+	37	NAEGRDRAFT_57488	predicted protein	ena	no
NAEGRscaffold_13	270380	270515	+	135	NAEGRDRAFT_57482	RCC1 domain-containing protein	ena	no
NAEGRscaffold_13	45162	45279	+	117	NAEGRDRAFT_78990	monoxygenase	ena	no
NAEGRscaffold_13	245294	245466	+	172	NAEGRDRAFT_79022	hypothetical protein	ena	no
NAEGRscaffold_13	238048	238074	-	26	NAEGRDRAFT_79021	hypothetical protein	ena	no
NAEGRscaffold_13	356757	356800	+	43	NAEGRDRAFT_79038	hypothetical protein	ena	no
NAEGRscaffold_13	142557	142683	+	126	NAEGRDRAFT_79008	chaperone protein	ena	no
NAEGRscaffold_13	457331	457366	+	35	NAEGRDRAFT_79045	oxidoreductase	ena	no
NAEGRscaffold_13	461748	461828	+	80	NAEGRDRAFT_57500	hypothetical protein	ena	no
NAEGRscaffold_13	124860	124894	+	34	NAEGRDRAFT_79004	ARF/SAR family small GTPase	ena	no
NAEGRscaffold_13	414834	414925	+	91	NAEGRDRAFT_79042	predicted protein	ena	no
NAEGRscaffold_13	145378	145413	-	35	NAEGRDRAFT_79009	TPR repeat domain-containing protein	ena	no
NAEGRscaffold_13	172457	172477	+	20	NAEGRDRAFT_38463	phosphoenolpyruvate carboxykinase	ena	no
NAEGRscaffold_13	312885	312898	+	13	NAEGRDRAFT_57490	IPT domain-containing protein	ena	no
NAEGRscaffold_13	247972	247998	-	26	NAEGRDRAFT_79023	ankyrin repeat domain-containing protein	ena	no
NAEGRscaffold_13	338984	339172	+	188	NAEGRDRAFT_79037	VHP domain-containing protein	ena	no
NAEGRscaffold_13	34389	34409	-	20	NAEGRDRAFT_57455	predicted protein	ena	no
NAEGRscaffold_13	55911	55982	+	71	NAEGRDRAFT_57460	hypothetical protein	ena	no
NAEGRscaffold_13	518861	518882	+	21	NAEGRDRAFT_79050	predicted protein	ena	no
NAEGRscaffold_13	259827	260026	-	199	NAEGRDRAFT_57481	hypothetical protein	ena	no
NAEGRscaffold_13	199200	199203	+	3	NAEGRDRAFT_79014	serine/threonine protein kinase	ena	no
NAEGRscaffold_13	72543	72578	+	35	NAEGRDRAFT_78996	villin	ena	no
NAEGRscaffold_13	127757	127777	+	20	NAEGRDRAFT_79005	hypothetical protein	ena	no
NAEGRscaffold_13	287810	287822	+	12	NAEGRDRAFT_79031	hypothetical protein	ena	no
NAEGRscaffold_13	433700	434010	+	310	NAEGRDRAFT_79043	serine-threonine kinase	ena	no
NAEGRscaffold_13	45891	45906	-	15	NAEGRDRAFT_57457	aminoglycoside phosphotransferase	ena	no
NAEGRscaffold_13	306201	306216	-	15	NAEGRDRAFT_79035	RGS domain-containing protein	ena	no
NAEGRscaffold_13	210801	210858	+	57	NAEGRDRAFT_79017	predicted protein	ena	no
NAEGRscaffold_13	511686	511846	+	160	NAEGRDRAFT_38487	predicted protein	ena	yes
NAEGRscaffold_13	295978	295994	+	16	NAEGRDRAFT_38485	nicotinate-nucleotide diphosphorylase	ena	no
NAEGRscaffold_13	203770	203786	-	16	NAEGRDRAFT_79016	hypothetical protein	ena	no
NAEGRscaffold_13	369005	369021	-	16	NAEGRDRAFT_79040	thioredoxin family protein	ena	no
NAEGRscaffold_13	248799	248835	-	36	NAEGRDRAFT_38480	predicted protein	ena	no
NAEGRscaffold_13	217548	217586	-	38	NAEGRDRAFT_79019	fascin domain-containing protein	ena	no
NAEGRscaffold_13	87898	87921	+	23	NAEGRDRAFT_78999	GPI anchored protein	ena	no
NAEGRscaffold_13	273458	273490	+	32	NAEGRDRAFT_57483	predicted protein	ena	no
NAEGRscaffold_13	139872	139889	+	17	NAEGRDRAFT_79007	predicted protein	ena	no
NAEGRscaffold_13	525000	525075	+	75	NAEGRDRAFT_57504	predicted protein	ena	no
NAEGRscaffold_13	202743	202783	-	40	NAEGRDRAFT_79015	hypothetical protein	ena	no
NAEGRscaffold_13	254933	255011	-	78	NAEGRDRAFT_35987	rab small GTPase	ena	no
NAEGRscaffold_13	188333	188349	+	16	NAEGRDRAFT_55694	26S proteasome subunit RPN9b	ena	no
NAEGRscaffold_13	214728	214773	+	45	NAEGRDRAFT_79018	coatomer delta subunit	ena	no
NAEGRscaffold_13	279621	279645	+	24	NAEGRDRAFT_57484	homeodomain-containing protein	ena	no
NAEGRscaffold_13	513850	513872	+	22	NAEGRDRAFT_35993	serine/threonine protein kinase	ena	no
NAEGRscaffold_16	16099	16129	+	30	NAEGRDRAFT_36164	predicted protein	ena	no
NAEGRscaffold_16	500276	500431	-	155	NAEGRDRAFT_38730	autophagy related protein ATG8	ena	no
NAEGRscaffold_16	433323	433338	-	15	NAEGRDRAFT_79260	TPR repeat domain-containing protein	ena	no
NAEGRscaffold_16	110592	110831	+	239	NAEGRDRAFT_79231	hypothetical protein	ena	no
NAEGRscaffold_16	21936	22013	+	77	NAEGRDRAFT_79216	hypothetical protein	ena	no
NAEGRscaffold_16	438363	438369	+	6	NAEGRDRAFT_79261	regulator of G-protein signaling 8-like protein	ena	no
NAEGRscaffold_16	222121	222133	-	12	NAEGRDRAFT_36203	branched-chain amino acid aminotransferase family protein	ena	no
NAEGRscaffold_16	341490	341542	-	52	NAEGRDRAFT_79253	delta-12 oleate desaturase	ena	no
NAEGRscaffold_16	153459	153490	+	31	NAEGRDRAFT_57645	choline kinase domain-containing protein	ena	no
NAEGRscaffold_16	279927	279957	+	30	NAEGRDRAFT_36212	methionyl-tRNA synthetase	ena	no
NAEGRscaffold_16	65735	65789	+	54	NAEGRDRAFT_83071	heat shock protein 70	ena	no
NAEGRscaffold_16	419197	419208	+	11	NAEGRDRAFT_38722	predicted protein	ena	no
NAEGRscaffold_16	60991	61063	-	72	NAEGRDRAFT_79220	AFG1 ATPase family protein	ena	no
NAEGRscaffold_16	385807	385851	-	44	NAEGRDRAFT_79256	agarase	ena	no
NAEGRscaffold_16	91740	91797	-	57	NAEGRDRAFT_79227	cobalamin synthesis protein	ena	no
NAEGRscaffold_16	96733	96854	+	121	NAEGRDRAFT_79228	ubiquitin fusion-degradation protein	ena	no
NAEGRscaffold_16	123483	123932	+	449	NAEGRDRAFT_79233	predicted protein	ena	no
NAEGRscaffold_16	497427	497445	+	18	NAEGRDRAFT_79267	hypothetical protein	ena	no
NAEGRscaffold_16	444611	444672	+	61	NAEGRDRAFT_79262	hypothetical protein	ena	no
NAEGRscaffold_16	52415	52549	-	134	NAEGRDRAFT_79219	WD40 domain-containing protein	ena	no
NAEGRscaffold_16	11716	11742	-	26	NAEGRDRAFT_38656	predicted protein	ena	no
NAEGRscaffold_16	186325	186346	+	21	NAEGRDRAFT_57647	sen1 helicase	ena	no
NAEGRscaffold_16	514128	514131	-	3	NAEGRDRAFT_57670	hypothetical protein	ena	no
NAEGRscaffold_16	89953	90016	+	63	NAEGRDRAFT_79226	predicted protein	ena	no
NAEGRscaffold_16	446241	446569	-	328	NAEGRDRAFT_79263	hypothetical protein	ena	no
NAEGRscaffold_16	292797	292923	-	126	NAEGRDRAFT_79250	hypothetical protein	ena	no
NAEGRscaffold_16	130929	131031	+	102	NAEGRDRAFT_83074	predicted protein	ena	no
NAEGRscaffold_16	431321	431336	+	15	NAEGRDRAFT_83083	cyclophilin-type peptidyl-prolyl cis-trans isomerase	ena	no
NAEGRscaffold_16	87884	87957	+	73	NAEGRDRAFT_82544	rab family small GTPase	ena	no
NAEGRscaffold_16	75973	75991	-	18	NAEGRDRAFT_38674	DEXH box helicase	ena	no
NAEGRscaffold_16	19719	19737	-	18	NAEGRDRAFT_79215	hypothetical protein	ena	no
NAEGRscaffold_16	100946	101036	-	90	NAEGRDRAFT_57638	hypothetical protein	ena	no
NAEGRscaffold_16	322162	322255	+	93	NAEGRDRAFT_79251	hypothetical protein	ena	yes
NAEGRscaffold_16	263540	263768	+	228	NAEGRDRAFT_79246	hypothetical protein	ena	no
NAEGRscaffold_16	474453	474512	+	59	NAEGRDRAFT_79264	hypothetical protein	ena	no
NAEGRscaffold_16	173528	173580	-	52	NAEGRDRAFT_38693	aconitase	ena	no
NAEGRscaffold_16	79580	79596	+	16	NAEGRDRAFT_38678	nucleolar basal body binding protein BN46/51 small subunit	ena	no
NAEGRscaffold_16	402318	402363	-	45	NAEGRDRAFT_83081	hypothetical protein	ena	no
NAEGRscaffold_16	145559	145623	+	64	NAEGRDRAFT_57644	hypothetical protein	ena	no
NAEGRscaffold_16	131386	131408	-	22	NAEGRDRAFT_36195	myo-inositol 1-phosphate synthase	ena	no
NAEGRscaffold_16	510170	510332	-	162	NAEGRDRAFT_36239	developmentally regulated GTP binding protein	ena	no
NAEGRscaffold_15	335760	335846	-	86	NAEGRDRAFT_79184	ATP synthase epsilon subunit	ena	yes
NAEGRscaffold_15	434173	434211	+	38	NAEGRDRAFT_79202	methyl-accepting chemotaxis protein	ena	yes
NAEGRscaffold_15	108706	108739	+	33	NAEGRDRAFT_79147	protein phosphatase 2A 55 kDa regulatory B subunit	ena	no
NAEGRscaffold_15	369099	369560	+	461	NAEGRDRAFT_79191	hypothetical protein	ena	no
NAEGRscaffold_15	398009	398126	-	117	NAEGRDRAFT_82541	NOL1/NOP2/sun family protein	ena	no
NAEGRscaffold_15	227896	227926	+	30	NAEGRDRAFT_36129	programmed cell death 6 protein-like protein	ena	no
NAEGRscaffold_15	355392	355448	+	56	NAEGRDRAFT_79187	dienelactone hydrolase family protein	ena	no
NAEGRscaffold_15	467490	467503	-	13	NAEGRDRAFT_79207	hypothetical protein	ena	no
NAEGRscaffold_15	448145	448257	+	112	NAEGRDRAFT_79203	predicted protein	ena	no
NAEGRscaffold_15	408688	408731	+	43	NAEGRDRAFT_56097	predicted protein	ena	no
NAEGRscaffold_15	202893	202910	-	17	NAEGRDRAFT_79164	glycosyl hydrolase family protein	ena	no
NAEGRscaffold_15	353082	353115	-	33	NAEGRDRAFT_79186	hypothetical protein	ena	no
NAEGRscaffold_15	122152	122170	+	18	NAEGRDRAFT_36107	axonemal dynein heavy chain	ena	no
NAEGRscaffold_15	196348	196403	-	55	NAEGRDRAFT_79163	ARF/SAR family small GTPase	ena	no
NAEGRscaffold_15	356368	356399	-	31	NAEGRDRAFT_79188	coatamer alpha subunit	ena	no
NAEGRscaffold_15	363181	363209	-	28	NAEGRDRAFT_79189	predicted protein	ena	no
NAEGRscaffold_15	170337	170396	+	59	NAEGRDRAFT_79157	hypothetical protein	ena	no
NAEGRscaffold_15	299491	299497	-	6	NAEGRDRAFT_55198	Sel1 repeat domain-containing protein	ena	no
NAEGRscaffold_15	389649	389669	+	20	NAEGRDRAFT_79192	hypothetical protein	ena	no
NAEGRscaffold_15	477358	477520	+	162	NAEGRDRAFT_38654	predicted protein	ena	yes
NAEGRscaffold_15	7106	7128	+	22	NAEGRDRAFT_79137	WD40 repeat domain-containing protein	ena	no
NAEGRscaffold_15	211395	211428	+	33	NAEGRDRAFT_83065	malate dehydrogenase	ena	no
NAEGRscaffold_15	224448	224495	+	47	NAEGRDRAFT_57589	hypothetical protein	ena	no
NAEGRscaffold_15	172381	172417	+	36	NAEGRDRAFT_79158	cyclophilin	ena	no
NAEGRscaffold_15	140695	140704	-	9	NAEGRDRAFT_79154	hypothetical protein	ena	no
NAEGRscaffold_15	365070	365083	-	13	NAEGRDRAFT_79190	WD40 repeat domain-containing protein	ena	no
NAEGRscaffold_15	162083	162111	-	28	NAEGRDRAFT_36109	predicted protein	ena	no
NAEGRscaffold_15	419691	419704	+	13	NAEGRDRAFT_57613	DENN domain-containing protein	ena	no
NAEGRscaffold_15	251975	252044	+	69	NAEGRDRAFT_57591	hypothetical protein	ena	no
NAEGRscaffold_15	85262	85313	-	51	NAEGRDRAFT_55709	exonuclease III protein	ena	no
NAEGRscaffold_15	108908	108940	-	32	NAEGRDRAFT_36106	predicted protein	ena	no
NAEGRscaffold_15	423781	423813	-	32	NAEGRDRAFT_38649	DUF841 domain-containing protein	ena	no
NAEGRscaffold_15	175452	175474	+	22	NAEGRDRAFT_79159	DUF663 domain-containing protein	ena	no
NAEGRscaffold_15	267456	267478	-	22	NAEGRDRAFT_79174	5'-3' exoribonuclease 1	ena	no
NAEGRscaffold_15	273015	273035	-	20	NAEGRDRAFT_57596	5'-3' exoribonuclease	ena	no
NAEGRscaffold_15	63234	63307	+	73	NAEGRDRAFT_79139	hypothetical protein	ena	no
NAEGRscaffold_15	255943	255961	-	18	NAEGRDRAFT_79172	hypothetical protein	ena	no
NAEGRscaffold_15	481256	481285	-	29	NAEGRDRAFT_79209	predicted protein	ena	no
NAEGRscaffold_15	498349	498495	+	146	NAEGRDRAFT_57624	RGS domain-containing protein	ena	no
NAEGRscaffold_15	126327	126370	-	43	NAEGRDRAFT_79151	dual specificity protein phosphatase	ena	no
NAEGRscaffold_15	326756	326779	+	23	NAEGRDRAFT_79180	DNA polymerase I	ena	no
NAEGRscaffold_15	460950	460997	+	47	NAEGRDRAFT_79205	predicted protein	ena	no
NAEGRscaffold_15	348974	349002	+	28	NAEGRDRAFT_79185	alanine dehydrogenase	ena	no
NAEGRscaffold_15	129592	129612	-	20	NAEGRDRAFT_79152	hypothetical protein	ena	no
NAEGRscaffold_15	123920	124090	-	170	NAEGRDRAFT_79150	hypothetical protein	ena	no
NAEGRscaffold_15	425809	425926	-	117	NAEGRDRAFT_79199	tubby protein	ena	no
NAEGRscaffold_15	408719	408743	-	24	NAEGRDRAFT_79196	hypothetical protein	ena	no
NAEGRscaffold_15	1060	1430	-	370	NAEGRDRAFT_79135	mevalonate kinase	ena	yes
NAEGRscaffold_15	320403	320416	-	13	NAEGRDRAFT_57599	map kinase	ena	no
NAEGRscaffold_15	179931	179959	+	28	NAEGRDRAFT_79160	hypothetical protein	ena	no
NAEGRscaffold_15	278843	278861	-	18	NAEGRDRAFT_79176	predicted protein	ena	no
NAEGRscaffold_15	238347	238394	+	47	NAEGRDRAFT_79168	hypothetical protein	ena	no
NAEGRscaffold_15	310725	310756	+	31	NAEGRDRAFT_79178	hypothetical protein	ena	no
NAEGRscaffold_15	491445	491459	+	14	NAEGRDRAFT_79210	adenylate cyclase	ena	no
NAEGRscaffold_15	80697	80713	-	16	NAEGRDRAFT_57570	hypothetical protein	ena	no
NAEGRscaffold_15	30088	30123	-	35	NAEGRDRAFT_36087	predicted protein	ena	no
NAEGRscaffold_15	265262	265305	+	43	NAEGRDRAFT_79173	kinesin-13	ena	no
NAEGRscaffold_15	253371	253379	-	8	NAEGRDRAFT_79171	hypothetical protein	ena	no
NAEGRscaffold_15	448475	448523	-	48	NAEGRDRAFT_79204	hypothetical protein	ena	no
NAEGRscaffold_15	427743	427781	-	38	NAEGRDRAFT_79200	predicted protein	ena	no
NAEGRscaffold_15	432767	432902	+	135	NAEGRDRAFT_79201	predicted protein	ena	no
NAEGRscaffold_15	397981	398011	+	30	NAEGRDRAFT_36150	predicted protein	ena	no
NAEGRscaffold_15	464932	464956	+	24	NAEGRDRAFT_79206	purine phosphorylase family protein	ena	no
NAEGRscaffold_43	180474	180578	+	104	NAEGRDRAFT_80778	hypothetical protein	ena	no
NAEGRscaffold_43	65772	65800	+	28	NAEGRDRAFT_58854	replication protein A1, 70 kDa-like protein	ena	no
NAEGRscaffold_43	126421	126503	-	82	NAEGRDRAFT_80773	hypothetical protein	ena	no
NAEGRscaffold_43	60263	60282	+	19	NAEGRDRAFT_80762	DNA polymerase alpha subunit B	ena	no
NAEGRscaffold_43	243963	243979	+	16	NAEGRDRAFT_58866	poly(ADP-ribose) synthetase	ena	no
NAEGRscaffold_43	274294	274378	-	84	NAEGRDRAFT_80787	hypothetical protein	ena	no
NAEGRscaffold_43	311391	311433	-	42	NAEGRDRAFT_80794	hypothetical protein	ena	no
NAEGRscaffold_43	146729	146746	+	17	NAEGRDRAFT_56273	mitochondrial carrier protein	ena	no
NAEGRscaffold_43	20993	21020	-	27	NAEGRDRAFT_58850	predicted protein	ena	no
NAEGRscaffold_43	253982	254012	-	30	NAEGRDRAFT_80783	copine-8	ena	no
NAEGRscaffold_43	71391	71396	-	5	NAEGRDRAFT_80765	hypothetical protein	ena	no
NAEGRscaffold_43	137172	137198	-	26	NAEGRDRAFT_58860	peptidase C2, calpain	ena	no
NAEGRscaffold_43	155547	155623	+	76	NAEGRDRAFT_80776	leucine-rich repeat-containing protein-like protein	ena	no
NAEGRscaffold_43	119714	119804	-	90	NAEGRDRAFT_80772	predicted protein	ena	no
NAEGRscaffold_43	187712	187740	+	28	NAEGRDRAFT_80779	hypothetical protein	ena	yes
NAEGRscaffold_43	95926	96558	+	632	NAEGRDRAFT_80768	hypothetical protein	ena	no
NAEGRscaffold_43	498193	498212	+	19	NAEGRDRAFT_58878	cache domain-containing protein	ena	no
NAEGRscaffold_43	212847	212868	-	21	NAEGRDRAFT_58864	aldehyde dehydrogenase	ena	no
NAEGRscaffold_43	238716	239032	+	316	NAEGRDRAFT_58865	t-snare protein	ena	no
NAEGRscaffold_43	19126	19156	+	30	NAEGRDRAFT_58849	predicted protein	ena	no
NAEGRscaffold_43	303069	303103	-	34	NAEGRDRAFT_80791	hypothetical protein	ena	no
NAEGRscaffold_43	311198	311221	+	23	NAEGRDRAFT_80793	hypothetical protein	ena	no
NAEGRscaffold_43	13778	14098	+	320	NAEGRDRAFT_58847	hypothetical protein	ena	no
NAEGRscaffold_43	308862	308875	-	13	NAEGRDRAFT_80792	predicted protein	ena	no
NAEGRscaffold_43	57196	57227	+	31	NAEGRDRAFT_80761	3'-5' exonuclease and HRDC domain-containing protein	ena	no
NAEGRscaffold_43	266328	266566	-	238	NAEGRDRAFT_80786	hypothetical protein	ena	no
NAEGRscaffold_43	280991	281095	-	104	NAEGRDRAFT_80788	hypothetical protein	ena	no
NAEGRscaffold_43	282083	282109	-	26	NAEGRDRAFT_58871	TNF receptor-associated protein	ena	no
NAEGRscaffold_43	24693	24768	+	75	NAEGRDRAFT_80760	N-acetyltransferase	ena	no
NAEGRscaffold_43	164670	165043	+	373	NAEGRDRAFT_80777	hypothetical protein	ena	no
NAEGRscaffold_43	482500	482567	+	67	NAEGRDRAFT_80795	hypothetical protein	ena	no
NAEGRscaffold_43	161081	161149	+	68	NAEGRDRAFT_55383	rab family small GTPase	ena	no
NAEGRscaffold_43	89795	89818	-	23	NAEGRDRAFT_80767	hypothetical protein	ena	no
NAEGRscaffold_43	82929	82961	-	32	NAEGRDRAFT_58856	predicted protein	ena	no
NAEGRscaffold_43	299318	299338	+	20	NAEGRDRAFT_58872	hypothetical protein	ena	no
NAEGRscaffold_17	501067	501182	-	115	NAEGRDRAFT_79342	predicted protein	ena	no
NAEGRscaffold_17	307779	307795	+	16	NAEGRDRAFT_79316	hypothetical protein	ena	no
NAEGRscaffold_17	183865	183894	-	29	NAEGRDRAFT_56117	bacterial integral membrane protein-like protein	ena	no
NAEGRscaffold_17	143201	143289	+	88	NAEGRDRAFT_57680	oxysterol-binding protein 1a	ena	no
NAEGRscaffold_17	314671	314673	+	2	NAEGRDRAFT_36287	hypothetical protein	ena	yes
NAEGRscaffold_17	483254	483273	+	19	NAEGRDRAFT_79340	rab family small GTPase	ena	no
NAEGRscaffold_17	409157	409536	-	379	NAEGRDRAFT_57714	esterase/lipase	ena	no
NAEGRscaffold_17	425274	425302	-	28	NAEGRDRAFT_38805	delta-12 oleate desaturase	ena	no
NAEGRscaffold_17	397242	397282	+	40	NAEGRDRAFT_79328	hypothetical protein	ena	no
NAEGRscaffold_17	159993	160032	+	39	NAEGRDRAFT_83090	proteasome subunit beta	ena	no
NAEGRscaffold_17	265296	265368	+	72	NAEGRDRAFT_79312	predicted protein	ena	no
NAEGRscaffold_17	119170	119266	+	96	NAEGRDRAFT_79287	hypothetical protein	ena	yes
NAEGRscaffold_17	487251	487304	-	53	NAEGRDRAFT_79341	predicted protein	ena	no
NAEGRscaffold_17	434023	434074	+	51	NAEGRDRAFT_79334	ornithine decarboxylase	ena	no
NAEGRscaffold_17	202537	202586	-	49	NAEGRDRAFT_38765	predicted protein	ena	no
NAEGRscaffold_17	454015	454340	+	325	NAEGRDRAFT_57719	hypothetical protein	ena	no
NAEGRscaffold_17	439051	439065	-	14	NAEGRDRAFT_57718	hypothetical protein	ena	no
NAEGRscaffold_17	227227	227284	+	57	NAEGRDRAFT_83092	isopentenyl diphosphate isomerase	ena	no
NAEGRscaffold_17	233216	233249	-	33	NAEGRDRAFT_82563	serine carboxypeptidase	ena	no
NAEGRscaffold_17	163117	163152	-	35	NAEGRDRAFT_79292	apyrase family protein	ena	no
NAEGRscaffold_17	436126	436215	-	89	NAEGRDRAFT_79335	leucine rich repeat domain-containing protein	ena	no
NAEGRscaffold_17	44139	44201	+	62	NAEGRDRAFT_79275	beta-lactamase family exonuclease	ena	no
NAEGRscaffold_17	339556	339573	-	17	NAEGRDRAFT_83096	proteasome regulatory non-ATP-ase subunit 5	ena	no
NAEGRscaffold_17	115743	115759	+	16	NAEGRDRAFT_79284	short-chain dehydrogenase/reductase	ena	no
NAEGRscaffold_17	75913	75965	+	52	NAEGRDRAFT_79280	4-hydroxyphenylpyruvate dioxygenase	ena	no
NAEGRscaffold_17	223140	223167	+	27	NAEGRDRAFT_79302	copper-exporting ATPase	ena	no
NAEGRscaffold_17	90010	90010	+	0	NAEGRDRAFT_79282	hypothetical protein	ena	no
NAEGRscaffold_17	213875	214024	+	149	NAEGRDRAFT_79301	serine/threonine protein kinase	ena	no
NAEGRscaffold_17	383893	383912	-	19	NAEGRDRAFT_57710	predicted protein	ena	no
NAEGRscaffold_17	185470	185484	-	14	NAEGRDRAFT_79295	kinesin	ena	no
NAEGRscaffold_17	450849	450863	+	14	NAEGRDRAFT_79337	predicted protein	ena	no
NAEGRscaffold_17	371785	371797	+	12	NAEGRDRAFT_79324	HMG box family protein	ena	no
NAEGRscaffold_17	406664	406879	+	215	NAEGRDRAFT_79330	hypothetical protein	ena	no
NAEGRscaffold_17	336724	336761	-	37	NAEGRDRAFT_38790	predicted protein	ena	no
NAEGRscaffold_17	196277	196366	-	89	NAEGRDRAFT_38762	prolyl oligopeptidase	ena	no
NAEGRscaffold_17	41612	41690	+	78	NAEGRDRAFT_56113	hypothetical protein	ena	no
NAEGRscaffold_17	61492	61531	+	39	NAEGRDRAFT_79279	abc transporter B family protein	ena	no
NAEGRscaffold_17	127862	127895	+	33	NAEGRDRAFT_79288	rab family small GTPase	ena	no
NAEGRscaffold_17	382892	382909	+	17	NAEGRDRAFT_77345	aminomethyltransferase	ena	no
NAEGRscaffold_17	399771	400282	-	511	NAEGRDRAFT_79329	RNA recognition motif domain-containing protein	ena	yes
NAEGRscaffold_17	56887	56969	-	82	NAEGRDRAFT_79278	hypothetical protein	ena	no
NAEGRscaffold_17	361173	361202	-	29	NAEGRDRAFT_79322	predicted protein	ena	no
NAEGRscaffold_17	315863	315969	+	106	NAEGRDRAFT_36289	mitochondrial phosphate carrier protein	ena	no
NAEGRscaffold_17	458154	458215	-	61	NAEGRDRAFT_38811	RRM domain-containing protein	ena	yes
NAEGRscaffold_17	296497	296518	+	21	NAEGRDRAFT_79315	predicted protein	ena	no
NAEGRscaffold_17	368860	368929	-	69	NAEGRDRAFT_57706	predicted protein	ena	no
NAEGRscaffold_17	419844	419878	+	34	NAEGRDRAFT_79332	hypothetical protein	ena	no
NAEGRscaffold_17	335284	335309	-	25	NAEGRDRAFT_36291	proteasome subunit alpha	ena	no
NAEGRscaffold_17	242249	242366	-	117	NAEGRDRAFT_79307	hypothetical protein	ena	no
NAEGRscaffold_17	117272	117604	+	332	NAEGRDRAFT_79285	alpha-2-glucosyltransferase	ena	no
NAEGRscaffold_17	116850	117352	-	502	NAEGRDRAFT_79286	hypothetical protein	ena	no
NAEGRscaffold_17	371874	371957	-	83	NAEGRDRAFT_36304	cystathionine beta synthase	ena	no
NAEGRscaffold_17	207822	207854	-	32	NAEGRDRAFT_79300	asparaginyl-tRNA synthetase	ena	no
NAEGRscaffold_17	165099	165129	-	30	NAEGRDRAFT_77339	vacuolar ATP synthase subunit C	ena	no
NAEGRscaffold_17	274153	274172	+	19	NAEGRDRAFT_57696	DnaJ-domain-containing protein	ena	no
NAEGRscaffold_17	240749	240767	+	18	NAEGRDRAFT_79305	proline hydroxylase	ena	no
NAEGRscaffold_17	78777	78826	-	49	NAEGRDRAFT_79281	RING finger domain-containing protein	ena	no
NAEGRscaffold_17	32761	32845	-	84	NAEGRDRAFT_56107	hypothetical protein	ena	no
NAEGRscaffold_18	343145	343167	-	22	NAEGRDRAFT_79399	hypothetical protein	ena	no
NAEGRscaffold_18	125210	125384	+	174	NAEGRDRAFT_79366	RGS domain-containing protein	ena	no
NAEGRscaffold_18	61860	61898	+	38	NAEGRDRAFT_57728	predicted protein	ena	no
NAEGRscaffold_18	31795	31816	-	21	NAEGRDRAFT_79345	hypothetical protein	ena	no
NAEGRscaffold_18	256658	256675	-	17	NAEGRDRAFT_79388	predicted protein	ena	no
NAEGRscaffold_18	278576	278637	+	61	NAEGRDRAFT_79390	mitochondrial rho GTPase	ena	no
NAEGRscaffold_18	53126	53259	+	133	NAEGRDRAFT_79349	predicted protein	ena	no
NAEGRscaffold_18	428475	428487	-	12	NAEGRDRAFT_57779	carbon-nitrogen hydrolase	ena	no
NAEGRscaffold_18	396333	396404	+	71	NAEGRDRAFT_79411	pleckstrin homology domain-containing protein	ena	no
NAEGRscaffold_18	126874	127042	+	168	NAEGRDRAFT_36339	predicted protein	ena	no
NAEGRscaffold_18	329228	329243	-	15	NAEGRDRAFT_57767	predicted protein	ena	no
NAEGRscaffold_18	168843	168859	-	16	NAEGRDRAFT_57747	SAPS domain-containing protein	ena	no
NAEGRscaffold_18	321593	321637	-	44	NAEGRDRAFT_79395	predicted protein	ena	no
NAEGRscaffold_18	179165	179437	-	272	NAEGRDRAFT_79379	predicted protein	ena	no
NAEGRscaffold_18	347193	347208	-	15	NAEGRDRAFT_79402	leucine rich repeat domain-containing protein	ena	no
NAEGRscaffold_18	14985	15009	-	24	NAEGRDRAFT_57722	alpha-mannosidase	ena	no
NAEGRscaffold_18	106411	106493	+	82	NAEGRDRAFT_38829	predicted protein	ena	no
NAEGRscaffold_18	52994	53324	-	330	NAEGRDRAFT_79350	hypothetical protein	ena	no
NAEGRscaffold_18	353734	353767	-	33	NAEGRDRAFT_57772	ubiquitin specific protease	ena	no
NAEGRscaffold_18	363372	363450	-	78	NAEGRDRAFT_79407	lipid transport family protein	ena	yes
NAEGRscaffold_18	471263	471293	-	30	NAEGRDRAFT_79418	von Willebrand factor type A domain-containing protein	ena	no
NAEGRscaffold_18	44578	45489	-	911	NAEGRDRAFT_79347	predicted protein	ena	no
NAEGRscaffold_18	133269	133299	-	30	NAEGRDRAFT_79369	predicted protein	ena	no
NAEGRscaffold_18	224177	224203	-	26	NAEGRDRAFT_57752	hypothetical protein	ena	no
NAEGRscaffold_18	363236	363251	+	15	NAEGRDRAFT_79406	xaa-pro aminopeptidase	ena	no
NAEGRscaffold_18	100023	100111	+	88	NAEGRDRAFT_36330	rho family small GTPase	ena	yes
NAEGRscaffold_18	385719	385736	-	17	NAEGRDRAFT_79410	aaa ATPase family protein	ena	no
NAEGRscaffold_18	443175	443187	-	12	NAEGRDRAFT_57780	hypothetical protein	ena	no
NAEGRscaffold_18	469956	469976	-	20	NAEGRDRAFT_56126	predicted protein	ena	no
NAEGRscaffold_18	145520	145771	-	251	NAEGRDRAFT_79372	hypothetical protein	ena	no
NAEGRscaffold_18	280243	280297	-	54	NAEGRDRAFT_36359	predicted protein	ena	no
NAEGRscaffold_18	366625	366674	-	49	NAEGRDRAFT_88117	tyrosine kinase	ena	no
NAEGRscaffold_18	114623	114624	-	1	NAEGRDRAFT_57740	hypothetical protein	ena	no
NAEGRscaffold_18	325242	325260	-	18	NAEGRDRAFT_57766	formate/nitrite transporter family protein	ena	no
NAEGRscaffold_18	81337	81510	+	173	NAEGRDRAFT_79355	endonuclease/exonuclease/phosphatase family protein	ena	no
NAEGRscaffold_18	174588	174896	+	308	NAEGRDRAFT_79378	hypothetical protein	ena	no
NAEGRscaffold_18	359055	359086	+	31	NAEGRDRAFT_57773	endonuclease	ena	no
NAEGRscaffold_18	128869	128874	+	5	NAEGRDRAFT_79368	hypothetical protein	ena	no
NAEGRscaffold_18	346075	346115	+	40	NAEGRDRAFT_79400	cysteine protease inhibitor	ena	no
NAEGRscaffold_18	229144	229164	-	20	NAEGRDRAFT_36353	DEAD/DEAH box helicase	ena	no
NAEGRscaffold_18	244677	244716	-	39	NAEGRDRAFT_79387	predicted protein	ena	no
NAEGRscaffold_18	477304	478497	+	1193	NAEGRDRAFT_79420	NHL repeat domain-containing protein	ena	no
NAEGRscaffold_18	97275	97422	+	147	NAEGRDRAFT_79357	hypothetical protein	ena	no
NAEGRscaffold_18	110437	110456	+	19	NAEGRDRAFT_79362	von Willebrand factor type D domain protein	ena	no
NAEGRscaffold_18	472996	473064	-	68	NAEGRDRAFT_79419	hypothetical protein	ena	no
NAEGRscaffold_18	315684	315722	+	38	NAEGRDRAFT_79394	hypothetical protein	ena	no
NAEGRscaffold_18	476717	477732	-	1015	NAEGRDRAFT_79421	hypothetical protein	ena	yes
NAEGRscaffold_18	115863	115877	-	14	NAEGRDRAFT_79365	viral resistance protein	ena	no
NAEGRscaffold_18	98404	98430	+	26	NAEGRDRAFT_79358	hypothetical protein	ena	no
NAEGRscaffold_18	346960	347075	+	115	NAEGRDRAFT_79401	hypothetical protein	ena	no
NAEGRscaffold_18	334920	334986	-	66	NAEGRDRAFT_57768	vacuolar sorting protein 9 domain-containing protein	ena	no
NAEGRscaffold_18	488336	488369	+	33	NAEGRDRAFT_77350	fatty acid desaturase family protein	ena	no
NAEGRscaffold_18	236849	236862	+	13	NAEGRDRAFT_79385	hypothetical protein	ena	no
NAEGRscaffold_18	168026	168280	-	254	NAEGRDRAFT_79376	hypothetical protein	ena	no
NAEGRscaffold_18	274947	275177	-	230	NAEGRDRAFT_36356	predicted protein	ena	yes
NAEGRscaffold_18	223648	223689	+	41	NAEGRDRAFT_36352	pyruvate phosphate dikinase	ena	no
NAEGRscaffold_18	310333	310345	+	12	NAEGRDRAFT_79393	hypothetical protein	ena	no
NAEGRscaffold_18	485594	485613	+	19	NAEGRDRAFT_79423	NHL repeat domain-containing protein	ena	no
NAEGRscaffold_18	64567	64916	+	349	NAEGRDRAFT_79352	hypothetical protein	ena	no
NAEGRscaffold_50	427712	427729	+	17	NAEGRDRAFT_81103	predicted protein	ena	no
NAEGRscaffold_50	311098	311115	+	17	NAEGRDRAFT_59109	predicted protein	ena	no
NAEGRscaffold_50	423744	423865	+	121	NAEGRDRAFT_81102	endonuclease/exonuclease/phosphatase family-like protein	ena	no
NAEGRscaffold_50	431198	431210	-	12	NAEGRDRAFT_83263	phospholipase	ena	no
NAEGRscaffold_50	463205	463404	-	199	NAEGRDRAFT_59125	hypothetical protein	ena	no
NAEGRscaffold_50	129399	129428	+	29	NAEGRDRAFT_81081	ribosomal protein L30	ena	no
NAEGRscaffold_50	418680	418754	-	74	NAEGRDRAFT_81101	hypothetical protein	ena	no
NAEGRscaffold_50	107524	107612	-	88	NAEGRDRAFT_59103	predicted protein	ena	no
NAEGRscaffold_50	401017	401035	-	18	NAEGRDRAFT_59118	predicted protein	ena	no
NAEGRscaffold_50	101836	101857	+	21	NAEGRDRAFT_81075	hypothetical protein	ena	no
NAEGRscaffold_50	469314	469383	+	69	NAEGRDRAFT_81108	alternative oxidase	ena	yes
NAEGRscaffold_50	15700	15720	+	20	NAEGRDRAFT_81061	acyl-CoA oxidase-like protein	ena	no
NAEGRscaffold_50	344993	345061	-	68	NAEGRDRAFT_59113	predicted protein	ena	no
NAEGRscaffold_50	115058	115082	-	24	NAEGRDRAFT_56304	predicted protein	ena	no
NAEGRscaffold_50	141344	141411	-	67	NAEGRDRAFT_59108	hypothetical protein	ena	no
NAEGRscaffold_50	57058	57132	-	74	NAEGRDRAFT_81069	predicted protein	ena	no
NAEGRscaffold_50	354258	354344	+	86	NAEGRDRAFT_59114	predicted protein	ena	no
NAEGRscaffold_50	44509	44543	+	34	NAEGRDRAFT_81066	Hypothetical protein	ena	no
NAEGRscaffold_50	59798	59971	-	173	NAEGRDRAFT_81070	hypothetical protein	ena	no
NAEGRscaffold_50	333601	333960	+	359	NAEGRDRAFT_81085	periplasmic phosphate binding protein-like protein	ena	no
NAEGRscaffold_50	20037	20082	+	45	NAEGRDRAFT_59090	hypothetical protein	ena	no
NAEGRscaffold_50	473355	473385	-	30	NAEGRDRAFT_81109	predicted protein	ena	no
NAEGRscaffold_50	108922	108966	-	44	NAEGRDRAFT_59104	predicted protein	ena	no
NAEGRscaffold_50	378275	378292	+	17	NAEGRDRAFT_81095	predicted protein	ena	no
NAEGRscaffold_50	27784	27797	+	13	NAEGRDRAFT_59091	hypothetical protein	ena	no
NAEGRscaffold_50	409373	409523	+	150	NAEGRDRAFT_82749	CBS-domain-containing protein	ena	yes
NAEGRscaffold_50	41128	41216	+	88	NAEGRDRAFT_81065	predicted protein	ena	no
NAEGRscaffold_50	55065	55207	+	142	NAEGRDRAFT_81068	predicted protein	ena	no
NAEGRscaffold_50	78246	78365	+	119	NAEGRDRAFT_83261	predicted protein	ena	no
NAEGRscaffold_50	376966	377028	+	62	NAEGRDRAFT_56305	predicted protein	ena	no
NAEGRscaffold_50	128578	128650	+	72	NAEGRDRAFT_59107	ubiquitin specific protease-like protein	ena	no
NAEGRscaffold_50	91856	91873	-	17	NAEGRDRAFT_59102	predicted protein	ena	no
NAEGRscaffold_50	30079	30105	+	26	NAEGRDRAFT_81064	predicted protein	ena	no
NAEGRscaffold_50	409811	409896	-	85	NAEGRDRAFT_59120	Hypothetical protein	ena	no
NAEGRscaffold_50	68005	68008	-	3	NAEGRDRAFT_81071	PAS domain-containing guanylate cyclase	ena	no
NAEGRscaffold_50	369774	369963	-	189	NAEGRDRAFT_81092	ANK domain-containing protein	ena	no
NAEGRscaffold_50	413023	413051	-	28	NAEGRDRAFT_81100	predicted protein	ena	no
NAEGRscaffold_50	450140	450162	-	22	NAEGRDRAFT_81106	eukaryotic translation initiation factor 3 subunit 9-like protein	ena	no
NAEGRscaffold_50	431121	431170	+	49	NAEGRDRAFT_81104	predicted protein	ena	no
NAEGRscaffold_50	338335	338371	-	36	NAEGRDRAFT_59112	elongation factor 2	ena	no
NAEGRscaffold_50	375361	375549	+	188	NAEGRDRAFT_81093	BTB domain-containing protein	ena	no
NAEGRscaffold_50	91809	91834	+	25	NAEGRDRAFT_81073	predicted protein	ena	no
NAEGRscaffold_50	327134	327145	-	11	NAEGRDRAFT_81084	patatin domain-containing protein	ena	no
NAEGRscaffold_50	368550	368569	-	19	NAEGRDRAFT_81090	predicted protein	ena	no
NAEGRscaffold_22	388746	388771	+	25	NAEGRDRAFT_57973	predicted protein	ena	no
NAEGRscaffold_22	431011	431059	-	48	NAEGRDRAFT_36605	hypothetical protein	ena	no
NAEGRscaffold_22	206214	206239	+	25	NAEGRDRAFT_79632	predicted protein	ena	no
NAEGRscaffold_22	334303	334397	-	94	NAEGRDRAFT_83136	abc transporter protein	ena	no
NAEGRscaffold_22	20700	20721	+	21	NAEGRDRAFT_88168	von Willebrand factor type A domain-containing protein	ena	no
NAEGRscaffold_22	295950	296096	+	146	NAEGRDRAFT_79647	VPS10 domain-containing protein	ena	no
NAEGRscaffold_22	124811	124849	-	38	NAEGRDRAFT_79620	histidine kinase/response regulator	ena	no
NAEGRscaffold_22	227933	227957	+	24	NAEGRDRAFT_79635	predicted protein	ena	no
NAEGRscaffold_22	201858	201905	+	47	NAEGRDRAFT_83134	ubiquitin activating enzyme subunit APPBP1	ena	no
NAEGRscaffold_22	291519	291595	-	76	NAEGRDRAFT_79646	predicted protein	ena	no
NAEGRscaffold_22	35066	35126	+	60	NAEGRDRAFT_57930	PUG domain-containing protein	ena	no
NAEGRscaffold_22	64185	64725	+	540	NAEGRDRAFT_79614	hypothetical protein	ena	no
NAEGRscaffold_22	347804	347829	-	25	NAEGRDRAFT_57968	predicted protein	ena	no
NAEGRscaffold_22	435205	435220	-	15	NAEGRDRAFT_79672	eukaryotic initiation factor 4E member 2-like protein	ena	no
NAEGRscaffold_22	252408	252436	+	28	NAEGRDRAFT_79641	Phd_like_TxnDC9 domain-containing protein	ena	no
NAEGRscaffold_22	118906	118922	+	16	NAEGRDRAFT_79617	hypothetical protein	ena	no
NAEGRscaffold_22	235560	235677	+	117	NAEGRDRAFT_79637	predicted protein	ena	no
NAEGRscaffold_22	175821	175860	+	39	NAEGRDRAFT_39060	fatty acyl CoA synthetase	ena	no
NAEGRscaffold_22	202764	202792	+	28	NAEGRDRAFT_39066	40S ribosomal protein S10	ena	no
NAEGRscaffold_22	448379	448431	-	52	NAEGRDRAFT_39105	26S proteasome	ena	no
NAEGRscaffold_22	5771	5846	-	75	NAEGRDRAFT_56150	hypothetical protein	ena	no
NAEGRscaffold_22	58306	58479	+	173	NAEGRDRAFT_57933	hypothetical protein	ena	no
NAEGRscaffold_22	219538	219779	+	241	NAEGRDRAFT_79633	predicted protein	ena	yes
NAEGRscaffold_22	286134	286163	+	29	NAEGRDRAFT_79644	FH2 domain-containing protein	ena	no
NAEGRscaffold_22	155708	155964	+	256	NAEGRDRAFT_79624	dead box ATP-dependent RNA helicase	ena	no
NAEGRscaffold_22	44042	44067	-	25	NAEGRDRAFT_79609	predicted protein	ena	no
NAEGRscaffold_22	353396	353504	+	108	NAEGRDRAFT_57969	predicted protein	ena	no
NAEGRscaffold_22	320810	320811	-	1	NAEGRDRAFT_79648	predicted protein	ena	no
NAEGRscaffold_22	140250	140256	-	6	NAEGRDRAFT_79622	predicted protein	ena	no
NAEGRscaffold_22	227928	228024	-	96	NAEGRDRAFT_57952	predicted protein	ena	no
NAEGRscaffold_22	119364	119456	-	92	NAEGRDRAFT_79618	fibronectin, type-like protein	ena	no
NAEGRscaffold_22	171040	171065	+	25	NAEGRDRAFT_79627	predicted protein	ena	no
NAEGRscaffold_22	424172	424227	-	55	NAEGRDRAFT_79669	hypothetical protein	ena	no
NAEGRscaffold_22	452123	452153	+	30	NAEGRDRAFT_57981	predicted protein	ena	no
NAEGRscaffold_22	323104	323229	+	125	NAEGRDRAFT_79649	hypothetical protein	ena	no
NAEGRscaffold_22	50397	50453	-	56	NAEGRDRAFT_79612	EF hand domain-containing protein	ena	no
NAEGRscaffold_22	158377	158406	-	29	NAEGRDRAFT_79626	hypothetical protein	ena	no
NAEGRscaffold_22	431021	431038	+	17	NAEGRDRAFT_57978	predicted protein	ena	no
NAEGRscaffold_22	158247	158280	+	33	NAEGRDRAFT_79625	hypothetical protein	ena	no
NAEGRscaffold_22	251316	251337	+	21	NAEGRDRAFT_79640	rhoGEF domain-containing protein	ena	no
NAEGRscaffold_22	111702	111716	-	14	NAEGRDRAFT_57936	hypothetical protein	ena	no
NAEGRscaffold_22	405022	405050	-	28	NAEGRDRAFT_57974	hypothetical protein	ena	no
NAEGRscaffold_22	147929	147973	-	44	NAEGRDRAFT_79623	hypothetical protein	ena	no
NAEGRscaffold_22	379940	379966	-	26	NAEGRDRAFT_79662	hypothetical protein	ena	no
NAEGRscaffold_22	347809	347840	+	31	NAEGRDRAFT_79655	predicted protein	ena	no
NAEGRscaffold_22	244813	245116	+	303	NAEGRDRAFT_83135	DEAD/DEAH box helicase	ena	yes
NAEGRscaffold_22	414895	415264	-	369	NAEGRDRAFT_79667	14-3-3 protein-like protein	ena	no
NAEGRscaffold_22	380952	380965	-	13	NAEGRDRAFT_57972	predicted protein	ena	no
NAEGRscaffold_22	368849	368884	-	35	NAEGRDRAFT_77381	cathepsin B	ena	no
NAEGRscaffold_22	441373	441378	+	5	NAEGRDRAFT_83137	KIAA1160 protein-like protein	ena	no
NAEGRscaffold_22	329930	329939	-	9	NAEGRDRAFT_36584	predicted protein	ena	no
NAEGRscaffold_22	266229	266288	+	59	NAEGRDRAFT_79642	predicted protein	ena	no
NAEGRscaffold_19	252668	252695	+	27	NAEGRDRAFT_79455	hypothetical protein	ena	no
NAEGRscaffold_19	46249	46277	-	28	NAEGRDRAFT_57795	CNH domain-containing protein	ena	no
NAEGRscaffold_19	439344	439370	-	26	NAEGRDRAFT_36416	predicted protein	ena	no
NAEGRscaffold_19	20589	20612	-	23	NAEGRDRAFT_79428	serine/threonine protein kinase	ena	no
NAEGRscaffold_19	354217	354267	+	50	NAEGRDRAFT_57821	hypothetical protein	ena	no
NAEGRscaffold_19	205041	205342	-	301	NAEGRDRAFT_57806	hypothetical protein	ena	no
NAEGRscaffold_19	389037	389079	-	42	NAEGRDRAFT_79472	phosphoinositide-binding protein	ena	no
NAEGRscaffold_19	173424	173640	-	216	NAEGRDRAFT_83109	actin bundling protein	ena	yes
NAEGRscaffold_19	229367	229488	-	121	NAEGRDRAFT_55745	alpha-tubulin	ena	no
NAEGRscaffold_19	195153	195170	-	17	NAEGRDRAFT_79449	serine/threonine protein kinase	ena	no
NAEGRscaffold_19	134908	134931	-	23	NAEGRDRAFT_79443	predicted protein	ena	no
NAEGRscaffold_19	415377	415409	+	32	NAEGRDRAFT_57825	hypothetical protein	ena	no
NAEGRscaffold_19	261833	261861	+	28	NAEGRDRAFT_57813	hypothetical protein	ena	no
NAEGRscaffold_19	127157	127189	+	32	NAEGRDRAFT_79441	hypothetical protein	ena	no
NAEGRscaffold_19	68439	68510	+	71	NAEGRDRAFT_57796	hypothetical protein	ena	no
NAEGRscaffold_19	144018	144031	-	13	NAEGRDRAFT_79444	PB1 domain-containing protein	ena	no
NAEGRscaffold_19	82886	82887	-	1	NAEGRDRAFT_82573	renal dipeptidase family protein	ena	no
NAEGRscaffold_19	433939	434097	+	158	NAEGRDRAFT_79477	predicted protein	ena	no
NAEGRscaffold_19	397905	398050	+	145	NAEGRDRAFT_79473	ADP-ribosylation factor GTPase activating protein	ena	yes
NAEGRscaffold_19	6326	6440	-	114	NAEGRDRAFT_79425	hypothetical protein	ena	no
NAEGRscaffold_19	294746	294830	+	84	NAEGRDRAFT_79461	INCENP protein	ena	no
NAEGRscaffold_19	212503	212530	+	27	NAEGRDRAFT_36384	heat shock protein 101	ena	no
NAEGRscaffold_19	123622	123635	+	13	NAEGRDRAFT_79439	predicted protein	ena	no
NAEGRscaffold_19	13086	13104	+	18	NAEGRDRAFT_57790	hypothetical protein	ena	no
NAEGRscaffold_19	457150	457181	-	31	NAEGRDRAFT_77358	TIP41-domain-containing protein	ena	yes
NAEGRscaffold_19	428490	428533	+	43	NAEGRDRAFT_57827	disulfide isomerase family protein	ena	no
NAEGRscaffold_19	163382	163400	-	18	NAEGRDRAFT_57802	hypothetical protein	ena	no
NAEGRscaffold_19	395660	395686	-	26	NAEGRDRAFT_36411	ribosomal protein L29-like protein	ena	no
NAEGRscaffold_19	418419	418425	+	6	NAEGRDRAFT_79475	exportin-2	ena	no
NAEGRscaffold_19	213459	213495	-	36	NAEGRDRAFT_36388	translation initiation factor IF-2	ena	no
NAEGRscaffold_19	112525	112545	+	20	NAEGRDRAFT_77353	seryl-tRNA synthetase	ena	no
NAEGRscaffold_19	260814	260850	+	36	NAEGRDRAFT_79456	hypothetical protein	ena	no
NAEGRscaffold_19	301392	301392	-	0	NAEGRDRAFT_79463	predicted protein	ena	no
NAEGRscaffold_19	36248	36285	+	37	NAEGRDRAFT_57793	hypothetical protein	ena	no
NAEGRscaffold_19	40489	40685	-	196	NAEGRDRAFT_56128	LOC495147 protein-like protein	ena	no
NAEGRscaffold_19	171056	171129	-	73	NAEGRDRAFT_79446	mitochondrial carrier protein	ena	no
NAEGRscaffold_19	280440	280447	+	7	NAEGRDRAFT_79459	hypothetical protein	ena	no
NAEGRscaffold_19	274015	274050	-	35	NAEGRDRAFT_79458	ANK domain-containing protein	ena	no
NAEGRscaffold_19	454003	454032	+	29	NAEGRDRAFT_38914	mitochondrial citrate synthetase	ena	no
NAEGRscaffold_19	338276	338362	+	86	NAEGRDRAFT_79466	adenylate cyclase 1-like protein	ena	no
NAEGRscaffold_19	86580	86597	-	17	NAEGRDRAFT_57797	coagulation factor 5/8 type, C-terminal domain-containing protein	ena	no
NAEGRscaffold_19	59189	59210	-	21	NAEGRDRAFT_79432	phosphohydrolase	ena	no
NAEGRscaffold_19	319448	319516	-	68	NAEGRDRAFT_36402	P-type II calcium ATPase	ena	no
NAEGRscaffold_19	190645	190731	-	86	NAEGRDRAFT_79448	ribosomal protein L3	ena	yes
NAEGRscaffold_19	314569	314643	+	74	NAEGRDRAFT_79464	hypothetical protein	ena	no
NAEGRscaffold_19	122027	122051	+	24	NAEGRDRAFT_79438	predicted protein	ena	no
NAEGRscaffold_19	220805	220869	-	64	NAEGRDRAFT_79453	beta-lactamase	ena	no
NAEGRscaffold_29	350613	350676	+	63	NAEGRDRAFT_58290	predicted protein	ena	no
NAEGRscaffold_29	231644	231660	-	16	NAEGRDRAFT_80042	predicted protein	ena	no
NAEGRscaffold_29	262292	262342	+	50	NAEGRDRAFT_58280	SH2 domain-containing protein	ena	no
NAEGRscaffold_29	354859	354906	+	47	NAEGRDRAFT_80058	hypothetical protein	ena	no
NAEGRscaffold_29	36448	36483	-	35	NAEGRDRAFT_80029	Adenylate/Guanylate cyclase	ena	no
NAEGRscaffold_29	45054	45073	+	19	NAEGRDRAFT_58266	hypothetical protein	ena	no
NAEGRscaffold_29	347005	347021	-	16	NAEGRDRAFT_36958	hypothetical protein	ena	no
NAEGRscaffold_29	269627	269734	+	107	NAEGRDRAFT_80047	predicted protein	ena	no
NAEGRscaffold_29	9226	10355	+	1129	NAEGRDRAFT_80027	hypothetical protein	ena	no
NAEGRscaffold_29	205074	205107	+	33	NAEGRDRAFT_80036	muramidase	ena	no
NAEGRscaffold_29	357956	357977	-	21	NAEGRDRAFT_36959	protein kinase	ena	no
NAEGRscaffold_29	344382	344419	-	37	NAEGRDRAFT_80054	BRCT domain-containing protein	ena	no
NAEGRscaffold_29	442417	442449	-	32	NAEGRDRAFT_39465	predicted protein	ena	no
NAEGRscaffold_29	314189	314227	-	38	NAEGRDRAFT_39446	predicted protein	ena	no
NAEGRscaffold_29	184646	184662	-	16	NAEGRDRAFT_80035	predicted protein	ena	no
NAEGRscaffold_29	241157	241265	-	108	NAEGRDRAFT_80043	hypothetical protein	ena	no
NAEGRscaffold_29	231494	231524	+	30	NAEGRDRAFT_36949	ATPase	ena	no
NAEGRscaffold_29	252581	252684	-	103	NAEGRDRAFT_80044	hypothetical protein	ena	no
NAEGRscaffold_29	312450	312546	+	96	NAEGRDRAFT_80052	predicted protein	ena	no
NAEGRscaffold_29	454888	454915	-	27	NAEGRDRAFT_80074	predicted protein	ena	no
NAEGRscaffold_29	217094	217112	-	18	NAEGRDRAFT_80039	hypothetical protein	ena	no
NAEGRscaffold_29	223610	223836	+	226	NAEGRDRAFT_80040	hypothetical protein	ena	no
NAEGRscaffold_29	210297	210418	+	121	NAEGRDRAFT_58274	hypothetical protein	ena	no
NAEGRscaffold_29	267015	267075	+	60	NAEGRDRAFT_80046	metallophosphoesterase	ena	no
NAEGRscaffold_29	287915	287969	-	54	NAEGRDRAFT_80050	hypothetical protein	ena	no
NAEGRscaffold_29	374268	374291	-	23	NAEGRDRAFT_58293	hypothetical protein	ena	no
NAEGRscaffold_29	440124	440159	-	35	NAEGRDRAFT_80070	S25 ribosomal protein	ena	no
NAEGRscaffold_29	450194	450285	+	91	NAEGRDRAFT_80073	rasGEF domain-containing protein	ena	no
NAEGRscaffold_29	206083	206141	-	58	NAEGRDRAFT_58273	protein phosphatase	ena	no
NAEGRscaffold_29	455879	455914	-	35	NAEGRDRAFT_36978	proteasome subunit	ena	no
NAEGRscaffold_29	82208	82278	+	70	NAEGRDRAFT_80032	myosin	ena	no
NAEGRscaffold_29	381496	381583	+	87	NAEGRDRAFT_58294	hypothetical protein	ena	no
NAEGRscaffold_29	426701	426724	+	23	NAEGRDRAFT_80068	HMG1/2 box	ena	no
NAEGRscaffold_29	281301	281325	-	24	NAEGRDRAFT_36951	predicted protein	ena	no
NAEGRscaffold_20	392682	392694	+	12	NAEGRDRAFT_57869	NOP12_SCHPO nucleolar protein 12-like protein	ena	no
NAEGRscaffold_20	278565	278577	-	12	NAEGRDRAFT_57851	eukaryotic translation initiation factor 3 subunit EifCe	ena	no
NAEGRscaffold_20	278564	278591	+	27	NAEGRDRAFT_79508	predicted protein	ena	no
NAEGRscaffold_20	362087	362685	-	598	NAEGRDRAFT_83119	predicted protein	ena	no
NAEGRscaffold_20	20482	20499	-	17	NAEGRDRAFT_79483	C3HC4 type zinc-finger domain-containing protein	ena	no
NAEGRscaffold_20	254693	254748	-	55	NAEGRDRAFT_79504	FAD linked oxidase-like protein	ena	no
NAEGRscaffold_20	355582	355648	-	66	NAEGRDRAFT_79523	predicted protein	ena	no
NAEGRscaffold_20	322094	322111	-	17	NAEGRDRAFT_38945	predicted protein	ena	no
NAEGRscaffold_20	240025	240173	+	148	NAEGRDRAFT_79501	HMG box domain-containing protein	ena	yes
NAEGRscaffold_20	430533	430580	-	47	NAEGRDRAFT_36485	hypothetical protein	ena	no
NAEGRscaffold_20	382418	382445	+	27	NAEGRDRAFT_79529	serine carboxypeptidase	ena	no
NAEGRscaffold_20	291086	291109	+	23	NAEGRDRAFT_82581	vWFA domain-containing protein	ena	no
NAEGRscaffold_20	15316	15500	-	184	NAEGRDRAFT_57831	SPRY domain-containing protein	ena	no
NAEGRscaffold_20	96707	96737	-	30	NAEGRDRAFT_79491	predicted protein	ena	no
NAEGRscaffold_20	333036	333143	-	107	NAEGRDRAFT_83118	dCTP deaminase	ena	yes
NAEGRscaffold_20	412523	412573	+	50	NAEGRDRAFT_79534	hypothetical protein	ena	no
NAEGRscaffold_20	263587	263602	+	15	NAEGRDRAFT_77359	hypothetical protein	ena	no
NAEGRscaffold_20	413889	413918	-	29	NAEGRDRAFT_56141	jun kinase activation domain binding protein	ena	no
NAEGRscaffold_20	350551	350570	-	19	NAEGRDRAFT_38949	acyl CoA binding protein	ena	no
NAEGRscaffold_20	377571	377589	-	18	NAEGRDRAFT_79528	ubiquitin-conjugating enzyme family protein	ena	no
NAEGRscaffold_20	293988	294013	+	25	NAEGRDRAFT_79511	ankyrin repeat domain-containing protein	ena	no
NAEGRscaffold_20	242283	242351	+	68	NAEGRDRAFT_79502	EF-hand domain-containing protein	ena	yes
NAEGRscaffold_20	359804	359833	+	29	NAEGRDRAFT_36459	40S ribosomal protein S21	ena	no
NAEGRscaffold_20	310233	310252	-	19	NAEGRDRAFT_38939	predicted protein	ena	no
NAEGRscaffold_20	270336	270450	-	114	NAEGRDRAFT_79507	rab family small GTPase	ena	no
NAEGRscaffold_20	377485	377506	+	21	NAEGRDRAFT_79527	DNA-directed RNA polymerase subunit A	ena	no
NAEGRscaffold_20	162774	162848	+	74	NAEGRDRAFT_79497	hypothetical protein	ena	no
NAEGRscaffold_20	159333	159599	-	266	NAEGRDRAFT_79496	hypothetical protein	ena	no
NAEGRscaffold_20	295661	295691	-	30	NAEGRDRAFT_79512	rab family small GTPase	ena	no
NAEGRscaffold_20	432300	432345	-	45	NAEGRDRAFT_57873	CHY zinc finger domain-containing protein	ena	no
NAEGRscaffold_20	209976	211159	-	1183	NAEGRDRAFT_36433	protein kinase	ena	no
NAEGRscaffold_20	54989	55128	+	139	NAEGRDRAFT_55748	beta tubulin	ena	no
NAEGRscaffold_20	42173	42199	+	26	NAEGRDRAFT_79487	acyl-coenzyme A oxidase	ena	no
NAEGRscaffold_20	385071	385091	-	20	NAEGRDRAFT_79530	hypothetical protein	ena	no
NAEGRscaffold_20	132747	132769	-	22	NAEGRDRAFT_79495	ATP-dependent DNA ligase IV	ena	no
NAEGRscaffold_20	174570	174598	+	28	NAEGRDRAFT_79498	hypothetical protein	ena	no
NAEGRscaffold_20	122375	122391	-	16	NAEGRDRAFT_38926	dioxygenase	ena	no
NAEGRscaffold_20	109228	109251	-	23	NAEGRDRAFT_79493	FAD linked oxidase	ena	no
NAEGRscaffold_20	76248	76272	+	24	NAEGRDRAFT_79489	hypothetical protein	ena	no
NAEGRscaffold_20	398673	398695	+	22	NAEGRDRAFT_79533	serine carboxypeptidase	ena	no
NAEGRscaffold_20	13493	13622	-	129	NAEGRDRAFT_57830	RGS-domain-containing protein	ena	no
NAEGRscaffold_20	106500	106518	-	18	NAEGRDRAFT_79492	hypothetical protein	ena	no
NAEGRscaffold_20	296844	296861	-	17	NAEGRDRAFT_79513	HVA22 family protein	ena	no
NAEGRscaffold_20	28285	28302	-	17	NAEGRDRAFT_57833	leucine rich repeat domain-containing protein	ena	no
NAEGRscaffold_20	347911	348123	-	212	NAEGRDRAFT_79520	NADH-ubiquinone oxidoreductase	ena	yes
NAEGRscaffold_20	96698	96712	+	14	NAEGRDRAFT_79490	hypothetical protein	ena	no
NAEGRscaffold_20	350436	350453	+	17	NAEGRDRAFT_79521	UBX domain-containing protein	ena	yes
NAEGRscaffold_20	416042	416067	+	25	NAEGRDRAFT_55752	protein kinase	ena	no
NAEGRscaffold_20	317372	317396	-	24	NAEGRDRAFT_79515	ras family small GTPase	ena	no
NAEGRscaffold_20	366335	366344	-	9	NAEGRDRAFT_79526	phosphoinositide polyphosphatase domain protein	ena	no
NAEGRscaffold_20	246623	246690	-	67	NAEGRDRAFT_79503	hypothetical protein	ena	no
NAEGRscaffold_20	38018	38940	-	922	NAEGRDRAFT_79486	hypothetical protein	ena	no
NAEGRscaffold_24	157893	157933	-	40	NAEGRDRAFT_39155	acyl CoA synthetase	ena	no
NAEGRscaffold_24	380290	380492	-	202	NAEGRDRAFT_79800	predicted protein	ena	no
NAEGRscaffold_24	244491	244513	-	22	NAEGRDRAFT_79771	predicted protein	ena	no
NAEGRscaffold_24	296449	296776	-	327	NAEGRDRAFT_79784	predicted protein	ena	no
NAEGRscaffold_24	198258	199052	-	794	NAEGRDRAFT_79760	chromodomain-containing protein	ena	no
NAEGRscaffold_24	127441	127455	-	14	NAEGRDRAFT_79743	predicted protein	ena	no
NAEGRscaffold_24	325105	325158	+	53	NAEGRDRAFT_36687	predicted protein	ena	no
NAEGRscaffold_24	217089	217144	-	55	NAEGRDRAFT_79764	hypothetical protein	ena	no
NAEGRscaffold_24	379439	379456	+	17	NAEGRDRAFT_79798	hypothetical protein	ena	no
NAEGRscaffold_24	391862	391894	+	32	NAEGRDRAFT_79803	hypothetical protein	ena	no
NAEGRscaffold_24	187361	187390	-	29	NAEGRDRAFT_39162	copine	ena	no
NAEGRscaffold_24	27628	27650	+	22	NAEGRDRAFT_58017	hypothetical protein	ena	no
NAEGRscaffold_24	51085	51109	-	24	NAEGRDRAFT_79727	predicted protein	ena	no
NAEGRscaffold_24	301725	301743	-	18	NAEGRDRAFT_79785	predicted protein	ena	no
NAEGRscaffold_24	288945	289802	-	857	NAEGRDRAFT_58061	predicted protein	ena	no
NAEGRscaffold_24	284622	284651	-	29	NAEGRDRAFT_56165	predicted protein	ena	no
NAEGRscaffold_24	154703	154731	-	28	NAEGRDRAFT_36654	nuclear transport factor 2	ena	no
NAEGRscaffold_24	329249	329399	+	150	NAEGRDRAFT_58066	predicted protein	ena	yes
NAEGRscaffold_24	91254	91369	-	115	NAEGRDRAFT_79736	hypothetical protein	ena	no
NAEGRscaffold_24	177636	177681	+	45	NAEGRDRAFT_79756	predicted protein	ena	no
NAEGRscaffold_24	257183	257206	-	23	NAEGRDRAFT_79773	hypothetical protein	ena	no
NAEGRscaffold_24	374013	374079	-	66	NAEGRDRAFT_36700	predicted protein	ena	no
NAEGRscaffold_24	105679	105710	+	31	NAEGRDRAFT_58030	glutathione S-transferase	ena	no
NAEGRscaffold_24	56902	57554	-	652	NAEGRDRAFT_79729	predicted protein	ena	no
NAEGRscaffold_24	399999	400019	+	20	NAEGRDRAFT_56166	predicted protein	ena	no
NAEGRscaffold_24	332930	332985	-	55	NAEGRDRAFT_36690	pyruvate kinase	ena	no
NAEGRscaffold_24	34615	34916	+	301	NAEGRDRAFT_79718	hypothetical protein	ena	no
NAEGRscaffold_24	63129	63187	+	58	NAEGRDRAFT_83142	peptidylprolyl isomerase	ena	no
NAEGRscaffold_24	55717	55827	+	110	NAEGRDRAFT_79728	predicted protein	ena	no
NAEGRscaffold_24	76484	76547	-	63	NAEGRDRAFT_79731	predicted protein	ena	no
NAEGRscaffold_24	50340	50375	+	35	NAEGRDRAFT_79726	predicted protein	ena	no
NAEGRscaffold_24	84664	85658	+	994	NAEGRDRAFT_36645	predicted protein	ena	no
NAEGRscaffold_24	157096	157122	+	26	NAEGRDRAFT_36658	predicted protein	ena	no
NAEGRscaffold_24	112688	112699	+	11	NAEGRDRAFT_79739	hypothetical protein	ena	yes
NAEGRscaffold_24	239891	239923	+	32	NAEGRDRAFT_79768	predicted protein	ena	no
NAEGRscaffold_24	142754	142786	-	32	NAEGRDRAFT_79745	predicted protein	ena	no
NAEGRscaffold_24	339090	339372	+	282	NAEGRDRAFT_79790	predicted protein	ena	no
NAEGRscaffold_24	38107	38148	+	41	NAEGRDRAFT_79720	hypothetical protein	ena	no
NAEGRscaffold_24	48121	48158	+	37	NAEGRDRAFT_58022	calponin homology domain-containing protein	ena	no
NAEGRscaffold_24	135724	135811	-	87	NAEGRDRAFT_79744	ubiquitinyl C19 peptidase	ena	no
NAEGRscaffold_24	294209	294232	-	23	NAEGRDRAFT_79782	predicted protein	ena	no
NAEGRscaffold_24	391860	391879	-	19	NAEGRDRAFT_79804	predicted protein	ena	no
NAEGRscaffold_24	150003	150026	-	23	NAEGRDRAFT_56163	glutathione S-transferase	ena	no
NAEGRscaffold_24	394919	395081	+	162	NAEGRDRAFT_79805	predicted protein	ena	yes
NAEGRscaffold_24	283425	283453	+	28	NAEGRDRAFT_58058	predicted protein	ena	no
NAEGRscaffold_24	117677	117694	+	17	NAEGRDRAFT_79741	predicted protein	ena	no
NAEGRscaffold_24	390334	390368	+	34	NAEGRDRAFT_79802	homo-isocitrate dehydrogenase	ena	no
NAEGRscaffold_24	295984	295997	-	13	NAEGRDRAFT_79783	predicted protein	ena	yes
NAEGRscaffold_24	184787	184810	-	23	NAEGRDRAFT_39159	threonyl-tRNA synthetase	ena	no
NAEGRscaffold_24	30845	30962	-	117	NAEGRDRAFT_79717	hypothetical protein	ena	no
NAEGRscaffold_24	13012	14171	+	1159	NAEGRDRAFT_58016	predicted protein	ena	no
NAEGRscaffold_24	46273	46353	+	80	NAEGRDRAFT_82606	hypothetical protein	ena	no
NAEGRscaffold_24	277791	278175	+	384	NAEGRDRAFT_58057	predicted protein	ena	no
NAEGRscaffold_24	221914	222161	+	247	NAEGRDRAFT_58049	predicted protein	ena	no
NAEGRscaffold_24	343814	343847	-	33	NAEGRDRAFT_58069	predicted protein	ena	no
NAEGRscaffold_24	380099	380144	+	45	NAEGRDRAFT_55776	predicted protein	ena	no
NAEGRscaffold_24	210797	210818	+	21	NAEGRDRAFT_79762	predicted protein	ena	no
NAEGRscaffold_24	148449	148477	-	28	NAEGRDRAFT_79747	hypothetical protein	ena	no
NAEGRscaffold_24	115636	115737	+	101	NAEGRDRAFT_79740	predicted protein	ena	no
NAEGRscaffold_24	145923	146031	+	108	NAEGRDRAFT_79746	hypothetical protein	ena	no
NAEGRscaffold_24	367301	367321	+	20	NAEGRDRAFT_79794	rhoGEF domain-containing protein	ena	no
NAEGRscaffold_24	151040	151078	-	38	NAEGRDRAFT_79749	predicted protein	ena	no
NAEGRscaffold_24	241148	241329	-	181	NAEGRDRAFT_36679	predicted protein	ena	no
NAEGRscaffold_24	208669	208708	+	39	NAEGRDRAFT_83145	predicted protein	ena	no
NAEGRscaffold_24	272001	272429	-	428	NAEGRDRAFT_56164	predicted protein	ena	no
NAEGRscaffold_24	40814	40889	-	75	NAEGRDRAFT_79722	G protein, alpha subunit family	ena	no
NAEGRscaffold_24	395633	395690	+	57	NAEGRDRAFT_58080	predicted protein	ena	yes
NAEGRscaffold_24	307245	307266	-	21	NAEGRDRAFT_79786	predicted protein	ena	no
NAEGRscaffold_24	211373	211388	-	15	NAEGRDRAFT_79763	hypothetical protein	ena	no
NAEGRscaffold_24	388671	388694	+	23	NAEGRDRAFT_79801	predicted protein	ena	no
NAEGRscaffold_23	312834	312849	+	15	NAEGRDRAFT_58006	predicted protein	ena	no
NAEGRscaffold_23	45993	46229	-	236	NAEGRDRAFT_36616	predicted protein	ena	no
NAEGRscaffold_23	226123	226139	-	16	NAEGRDRAFT_79696	hypothetical protein	ena	no
NAEGRscaffold_23	171323	171379	+	56	NAEGRDRAFT_77384	WD40 repeat domain-containing protein	ena	no
NAEGRscaffold_23	88254	88269	-	15	NAEGRDRAFT_39110	phosphoglucomutase/phosphomannomutase family protein	ena	no
NAEGRscaffold_23	58299	58454	-	155	NAEGRDRAFT_79679	RpsQ domain-containing protein	ena	no
NAEGRscaffold_23	92914	93395	+	481	NAEGRDRAFT_57989	predicted protein	ena	no
NAEGRscaffold_23	93615	93675	-	60	NAEGRDRAFT_39113	predicted protein	ena	no
NAEGRscaffold_23	349745	349764	-	19	NAEGRDRAFT_79708	GTP binding protein	ena	no
NAEGRscaffold_23	195711	195719	+	8	NAEGRDRAFT_79695	ARF/SAR family small GTPase	ena	yes
NAEGRscaffold_23	131636	131661	+	25	NAEGRDRAFT_79690	ras GTPase-activating-like protein IQGAP3	ena	no
NAEGRscaffold_23	349380	349468	+	88	NAEGRDRAFT_79707	predicted protein	ena	no
NAEGRscaffold_23	332056	332067	-	11	NAEGRDRAFT_79706	predicted protein	ena	no
NAEGRscaffold_23	418059	418060	+	1	NAEGRDRAFT_58015	predicted protein	ena	no
NAEGRscaffold_23	162660	162819	+	159	NAEGRDRAFT_57995	rho GTPase activating protein	ena	no
NAEGRscaffold_23	297956	297976	+	20	NAEGRDRAFT_79700	predicted protein	ena	no
NAEGRscaffold_23	401692	401748	+	56	NAEGRDRAFT_79711	predicted protein	ena	no
NAEGRscaffold_23	25945	25969	+	24	NAEGRDRAFT_79676	hypothetical protein	ena	no
NAEGRscaffold_23	66287	66321	-	34	NAEGRDRAFT_79681	component of scar regulatory complex	ena	no
NAEGRscaffold_23	416225	416367	+	142	NAEGRDRAFT_58014	predicted protein	ena	no
NAEGRscaffold_23	115840	115840	+	0	NAEGRDRAFT_79688	predicted protein	ena	no
NAEGRscaffold_23	80146	80202	+	56	NAEGRDRAFT_79682	integrator complex subunit 4	ena	no
NAEGRscaffold_23	359951	359970	-	19	NAEGRDRAFT_79709	methyltransferase type 11	ena	no
NAEGRscaffold_23	1	2	-	1	NAEGRDRAFT_79675	mito_carr domain-containing protein	ena	no
NAEGRscaffold_23	300919	301018	+	99	NAEGRDRAFT_79702	predicted protein	ena	no
NAEGRscaffold_26	228340	228357	+	17	NAEGRDRAFT_36816	Aldo/keto reductase	ena	no
NAEGRscaffold_26	358525	358607	+	82	NAEGRDRAFT_56185	predicted protein	ena	no
NAEGRscaffold_26	190179	190208	-	29	NAEGRDRAFT_58148	hypothetical protein	ena	no
NAEGRscaffold_26	313431	313498	-	67	NAEGRDRAFT_79910	predicted protein	ena	no
NAEGRscaffold_26	371602	371619	-	17	NAEGRDRAFT_79922	phosphatidylserine decarboxylase	ena	no
NAEGRscaffold_26	106373	106389	-	16	NAEGRDRAFT_79886	predicted protein	ena	no
NAEGRscaffold_26	154879	154942	-	63	NAEGRDRAFT_79891	hypothetical protein	ena	no
NAEGRscaffold_26	228334	228344	-	10	NAEGRDRAFT_79902	predicted protein	ena	no
NAEGRscaffold_26	20833	20861	-	28	NAEGRDRAFT_79880	predicted protein	ena	no
NAEGRscaffold_26	148494	148544	-	50	NAEGRDRAFT_79890	FH2 domain-containing protein	ena	no
NAEGRscaffold_26	300531	300705	-	174	NAEGRDRAFT_79909	predicted protein	ena	no
NAEGRscaffold_26	215934	216036	+	102	NAEGRDRAFT_58152	predicted protein	ena	no
NAEGRscaffold_26	232543	232601	+	58	NAEGRDRAFT_79903	hypothetical protein	ena	no
NAEGRscaffold_26	205878	205940	-	62	NAEGRDRAFT_58150	rab family small GTPase	ena	no
NAEGRscaffold_26	366744	366786	-	42	NAEGRDRAFT_39324	predicted protein	ena	no
NAEGRscaffold_26	344136	344354	-	218	NAEGRDRAFT_79916	predicted protein	ena	yes
NAEGRscaffold_26	198522	198639	+	117	NAEGRDRAFT_79896	predicted protein	ena	yes
NAEGRscaffold_26	404450	404500	-	50	NAEGRDRAFT_36839	predicted protein	ena	no
NAEGRscaffold_26	320941	320987	-	46	NAEGRDRAFT_58163	scar regulatory complex protein	ena	no
NAEGRscaffold_26	346713	346734	+	21	NAEGRDRAFT_55789	predicted protein	ena	no
NAEGRscaffold_26	177845	177961	+	116	NAEGRDRAFT_79892	predicted protein	ena	no
NAEGRscaffold_26	390056	390259	-	203	NAEGRDRAFT_36836	predicted protein	ena	yes
NAEGRscaffold_26	240952	240987	-	35	NAEGRDRAFT_79904	predicted protein	ena	no
NAEGRscaffold_26	377869	377917	+	48	NAEGRDRAFT_79923	predicted protein	ena	no
NAEGRscaffold_26	316873	316885	-	12	NAEGRDRAFT_79911	predicted protein	ena	no
NAEGRscaffold_26	66020	66052	+	32	NAEGRDRAFT_79884	hypothetical protein	ena	no
NAEGRscaffold_26	9974	10032	-	58	NAEGRDRAFT_55286	hypothetical protein	ena	no
NAEGRscaffold_26	285191	285224	-	33	NAEGRDRAFT_79908	predicted protein	ena	no
NAEGRscaffold_26	212917	212947	+	30	NAEGRDRAFT_58151	rasGEF domain-containing protein	ena	no
NAEGRscaffold_26	143711	143806	+	95	NAEGRDRAFT_79889	predicted protein	ena	no
NAEGRscaffold_26	346842	346863	-	21	NAEGRDRAFT_79918	predicted protein	ena	no
NAEGRscaffold_26	337150	337218	+	68	NAEGRDRAFT_58165	predicted protein	ena	no
NAEGRscaffold_27	127102	127152	+	50	NAEGRDRAFT_79940	predicted protein	ena	no
NAEGRscaffold_27	340074	340088	-	14	NAEGRDRAFT_79967	hypothetical protein	ena	no
NAEGRscaffold_27	23215	23241	-	26	NAEGRDRAFT_55791	polyubiquitin	ena	no
NAEGRscaffold_27	176972	176997	+	25	NAEGRDRAFT_79947	predicted protein	ena	no
NAEGRscaffold_27	177044	177070	-	26	NAEGRDRAFT_79948	predicted protein	ena	no
NAEGRscaffold_27	351629	351644	+	15	NAEGRDRAFT_79970	diaphanous-related formin	ena	no
NAEGRscaffold_27	323559	323576	+	17	NAEGRDRAFT_79964	cap binding protein with MIF4G domain	ena	no
NAEGRscaffold_27	150371	150595	+	224	NAEGRDRAFT_79945	predicted protein	ena	no
NAEGRscaffold_27	111855	111886	-	31	NAEGRDRAFT_83175	predicted protein	ena	no
NAEGRscaffold_27	246978	247081	+	103	NAEGRDRAFT_79956	predicted protein	ena	yes
NAEGRscaffold_27	347285	347363	+	78	NAEGRDRAFT_79969	predicted protein	ena	no
NAEGRscaffold_27	97289	97315	-	26	NAEGRDRAFT_58186	predicted protein	ena	no
NAEGRscaffold_27	141619	141665	+	46	NAEGRDRAFT_79943	predicted protein	ena	no
NAEGRscaffold_27	194763	194798	-	35	NAEGRDRAFT_79950	predicted protein	ena	no
NAEGRscaffold_27	92772	92788	+	16	NAEGRDRAFT_79935	predicted protein	ena	no
NAEGRscaffold_27	222680	222747	-	67	NAEGRDRAFT_79953	predicted protein	ena	no
NAEGRscaffold_27	387609	387732	+	123	NAEGRDRAFT_79976	predicted protein	ena	yes
NAEGRscaffold_27	197451	197517	-	66	NAEGRDRAFT_79951	predicted protein	ena	no
NAEGRscaffold_27	396579	396608	-	29	NAEGRDRAFT_79978	hypothetical protein	ena	no
NAEGRscaffold_27	31558	31583	+	25	NAEGRDRAFT_58176	predicted protein	ena	no
NAEGRscaffold_27	52333	52345	-	12	NAEGRDRAFT_79931	homeodomain-containing protein	ena	no
NAEGRscaffold_27	244124	244159	-	35	NAEGRDRAFT_77418	ARF/SAR family small GTPase	ena	no
NAEGRscaffold_27	92847	92881	-	34	NAEGRDRAFT_58185	predicted protein	ena	no
NAEGRscaffold_27	252620	252642	+	22	NAEGRDRAFT_79957	rasGTPase-activating protein	ena	no
NAEGRscaffold_27	319123	319160	-	37	NAEGRDRAFT_79963	predicted protein	ena	no
NAEGRscaffold_27	263175	263228	-	53	NAEGRDRAFT_58206	predicted protein	ena	no
NAEGRscaffold_27	316274	316343	+	69	NAEGRDRAFT_79962	predicted protein	ena	no
NAEGRscaffold_27	142991	143003	+	12	NAEGRDRAFT_79944	mitochondrial RNA ligase	ena	no
NAEGRscaffold_27	164108	164158	+	50	NAEGRDRAFT_79946	predicted protein	ena	no
NAEGRscaffold_27	64315	64334	-	19	NAEGRDRAFT_79933	predicted protein	ena	no
NAEGRscaffold_27	265109	265132	-	23	NAEGRDRAFT_39361	predicted protein	ena	no
NAEGRscaffold_27	343271	343296	-	25	NAEGRDRAFT_36877	predicted protein	ena	no
NAEGRscaffold_27	411940	411977	-	37	NAEGRDRAFT_79980	hypothetical protein	ena	no
NAEGRscaffold_27	359369	359384	-	15	NAEGRDRAFT_79971	hypothetical protein	ena	no
NAEGRscaffold_27	284825	284826	+	1	NAEGRDRAFT_58209	predicted protein	ena	no
NAEGRscaffold_27	59240	59271	+	31	NAEGRDRAFT_79932	predicted protein	ena	no
NAEGRscaffold_27	279575	279660	-	85	NAEGRDRAFT_58208	predicted protein	ena	no
NAEGRscaffold_27	228578	228605	+	27	NAEGRDRAFT_58202	predicted protein	ena	no
NAEGRscaffold_27	137327	137357	-	30	NAEGRDRAFT_58191	UBL domain-containing protein	ena	no
NAEGRscaffold_27	215618	215635	-	17	NAEGRDRAFT_79952	hypothetical protein	ena	no
NAEGRscaffold_27	94004	94184	+	180	NAEGRDRAFT_79937	predicted protein	ena	no
NAEGRscaffold_36	188667	188693	+	26	NAEGRDRAFT_58596	helicase	ena	no
NAEGRscaffold_36	82254	82276	+	22	NAEGRDRAFT_80422	hypothetical protein	ena	no
NAEGRscaffold_36	157764	157792	+	28	NAEGRDRAFT_80433	hypothetical protein	ena	no
NAEGRscaffold_36	28695	28865	-	170	NAEGRDRAFT_80419	WD-repeat protein	ena	no
NAEGRscaffold_36	212517	212533	+	16	NAEGRDRAFT_80442	hypothetical protein	ena	no
NAEGRscaffold_36	392690	392738	+	48	NAEGRDRAFT_80464	predicted protein	ena	no
NAEGRscaffold_36	242097	242154	+	57	NAEGRDRAFT_80445	ribosomal protein L4/L1e	ena	yes
NAEGRscaffold_36	185316	185319	+	3	NAEGRDRAFT_80437	hypothetical protein	ena	no
NAEGRscaffold_36	376282	376301	+	19	NAEGRDRAFT_80461	predicted protein	ena	no
NAEGRscaffold_36	390138	390151	+	13	NAEGRDRAFT_56245	predicted protein	ena	no
NAEGRscaffold_36	210033	210196	-	163	NAEGRDRAFT_80441	predicted protein	ena	no
NAEGRscaffold_36	130074	130146	+	72	NAEGRDRAFT_58587	predicted protein	ena	yes
NAEGRscaffold_36	101355	101376	+	21	NAEGRDRAFT_80425	hypothetical protein	ena	no
NAEGRscaffold_36	14543	14561	-	18	NAEGRDRAFT_80417	predicted protein	ena	no
NAEGRscaffold_36	237533	237558	-	25	NAEGRDRAFT_58601	phosphatidylinositol polyphosphate 5-phosphatase	ena	no
NAEGRscaffold_36	244921	245042	-	121	NAEGRDRAFT_80446	fibronectin, type-like protein	ena	no
NAEGRscaffold_36	125688	125705	+	17	NAEGRDRAFT_80428	hypothetical protein	ena	no
NAEGRscaffold_36	38935	38956	+	21	NAEGRDRAFT_80420	dedicator of cytokinesis protein-like protein	ena	no
NAEGRscaffold_36	163338	163402	+	64	NAEGRDRAFT_58592	Heat-shock protein	ena	yes
NAEGRscaffold_36	181518	181750	+	232	NAEGRDRAFT_80436	hypothetical protein	ena	no
NAEGRscaffold_36	133028	133040	-	12	NAEGRDRAFT_80430	predicted protein	ena	no
NAEGRscaffold_36	113578	113628	-	50	NAEGRDRAFT_80426	hypothetical protein	ena	no
NAEGRscaffold_36	367207	367278	-	71	NAEGRDRAFT_56244	coronin	ena	no
NAEGRscaffold_36	142845	142889	+	44	NAEGRDRAFT_80431	predicted protein	ena	no
NAEGRscaffold_36	8135	8150	-	15	NAEGRDRAFT_83220	katanin p60	ena	no
NAEGRscaffold_36	327063	327104	+	41	NAEGRDRAFT_80459	hypothetical protein	ena	no
NAEGRscaffold_36	290069	290094	-	25	NAEGRDRAFT_80454	hypothetical protein	ena	no
NAEGRscaffold_36	278040	278067	-	27	NAEGRDRAFT_80450	predicted protein	ena	no
NAEGRscaffold_36	312139	312430	+	291	NAEGRDRAFT_80456	hypothetical protein	ena	no
NAEGRscaffold_36	95616	95708	-	92	NAEGRDRAFT_58582	DUF738 domain-containing protein	ena	no
NAEGRscaffold_36	261196	261271	-	75	NAEGRDRAFT_80447	predicted protein	ena	yes
NAEGRscaffold_36	114837	114852	-	15	NAEGRDRAFT_80427	RGS-domain-containing protein	ena	no
[truncated: 3,420 more rows]

## Sheet: T. vaginalis 3'UTR annotation
chrom	3'utr_start	3'utr_end	strand	3'utr_length	gene_id	description	source	alternative_polyadentlation
DS113177	9950	10067	+	117	TVAG_118920	conserved hypothetical protein	VEuPathDB	no
DS113177	91214	91553	-	339	TVAG_119230	tankyrase, putative	VEuPathDB	no
DS113177	107233	107566	+	333	TVAG_119270	conserved hypothetical protein	VEuPathDB	no
DS113177	111782	111826	-	44	TVAG_119290	conserved hypothetical protein	VEuPathDB	no
DS113177	117585	117659	-	74	TVAG_119330	60S ribosomal protein L21, putative	VEuPathDB	yes
DS113177	134470	134534	-	64	TVAG_119450	conserved hypothetical protein	VEuPathDB	no
DS113177	154606	154818	-	212	TVAG_119500	thioredoxin, putative	VEuPathDB	yes
DS113177	172112	173052	+	940	TVAG_TEG_DS113177_2_1	mariner transposase	VEuPathDB	no
DS113177	177296	177298	-	2	TVAG_119570	conserved hypothetical protein	VEuPathDB	no
DS113177	199544	199646	+	102	TVAG_119620	conserved hypothetical protein	VEuPathDB	no
DS113177	208843	208897	+	54	TVAG_119660	conserved hypothetical protein	VEuPathDB	no
DS113177	221935	221980	-	45	TVAG_119710	Clan ME, family M16, insulinase-like metallopeptidase	VEuPathDB	no
DS113177	225425	225435	+	10	TVAG_119720	vacuolar protein sorting, putative	VEuPathDB	no
DS113177	225958	225966	-	8	TVAG_119730	conserved hypothetical protein	VEuPathDB	no
DS113177	227491	227548	-	57	TVAG_119740	conserved hypothetical protein	VEuPathDB	no
DS113177	238392	238465	+	73	TVAG_119780	conserved hypothetical protein	VEuPathDB	no
DS113177	244446	244475	+	29	TVAG_119800	conserved hypothetical protein	VEuPathDB	no
DS113177	275771	275869	+	98	TVAG_119970	conserved hypothetical protein	VEuPathDB	yes
DS113177	297533	297540	+	7	TVAG_120030	conserved hypothetical protein	VEuPathDB	no
DS113177	326647	326727	+	80	TVAG_120180	40S ribosomal protein S10, putative	VEuPathDB	no
DS113177	327165	327217	-	52	TVAG_120190	centrin, putative	VEuPathDB	no
DS113177	329124	329149	-	25	TVAG_RG_DS113177_13	caldesmon, putative	VEuPathDB	no
DS113177	358166	358207	-	41	TVAG_120290	ubiquitin, putative	VEuPathDB	no
DS113177	366163	366279	-	116	TVAG_120340	superoxide dismutase [mn], putative	VEuPathDB	yes
DS113177	370917	370940	-	23	TVAG_120360	conserved hypothetical protein	VEuPathDB	no
DS113177	375327	375385	+	58	TVAG_120370	Extracellular ribonuclease precursor, putative	VEuPathDB	yes
DS113177	377188	377288	+	100	TVAG_120380	MYB, putative	VEuPathDB	yes
DS113177	377314	377368	-	54	TVAG_120390	Clan SC, family S33, methylesterase-like serine peptidase	VEuPathDB	no
DS113177	406906	406944	-	38	TVAG_120500	conserved hypothetical protein	VEuPathDB	no
DS113177	437952	437984	-	32	TVAG_120630	ADP-ribosylation factor, arf, putative	VEuPathDB	no
DS113177	441753	441775	-	22	TVAG_120660	conserved hypothetical protein	VEuPathDB	no
DS113177	470327	470371	+	44	TVAG_120730	phosphoglycerate mutase, putative	VEuPathDB	no
DS113177	499546	499690	+	144	TVAG_120830	DNA-binding protein eta2, putative	VEuPathDB	no
DS113177	533975	534183	+	208	TVAG_120980	40S ribosomal protein S12, putative	VEuPathDB	yes
DS113177	540698	541064	+	366	TVAG_121030	conserved hypothetical protein	VEuPathDB	yes
DS113177	547102	547573	-	471	TVAG_TEG_DS113177_6_1	mariner transposase	VEuPathDB	no
DS113177	562013	562079	-	66	TVAG_121100	60S ribosomal protein L18, putative	VEuPathDB	yes
DS113178	6247	6292	-	45	TVAG_070130	conserved hypothetical protein	VEuPathDB	no
DS113178	7844	8195	-	351	TVAG_070140	spac30.02C protein, putative	VEuPathDB	no
DS113178	9776	10716	-	940	TVAG_TEG_DS113178_1_1	mariner transposase	VEuPathDB	no
DS113178	90429	90473	+	44	TVAG_070500	Rab7g protein, putative	VEuPathDB	no
DS113178	93239	93255	-	16	TVAG_070530	ribosomal protein L13, putative	VEuPathDB	no
DS113178	103898	103898	+	0	TVAG_070550	syntaxin, putative	VEuPathDB	no
DS113178	108681	109013	+	332	TVAG_070580	tetratricopeptide repeat protein, tpr, putative	VEuPathDB	no
DS113178	131220	131247	+	27	TVAG_070640	Rab5b, putative	VEuPathDB	yes
DS113178	165088	165102	+	14	TVAG_070810	hypothetical protein	VEuPathDB	no
DS113178	165490	165735	-	245	TVAG_070820	conserved hypothetical protein	VEuPathDB	no
DS113178	167495	167549	+	54	TVAG_070830	cytidylate kinase, putative	VEuPathDB	no
DS113178	171179	171190	+	11	TVAG_070850	ankyrin repeat domain, putative	VEuPathDB	no
DS113178	194487	194517	-	30	TVAG_070930	arp2/3 complex 21 kD subunit, putative	VEuPathDB	no
DS113178	228268	228269	+	1	TVAG_071080	cysteine synthase, putative	VEuPathDB	no
DS113178	316378	316410	+	32	TVAG_071390	xpa-binding protein, putative	VEuPathDB	no
DS113178	347241	347745	+	504	TVAG_TEG_DS113178_4_1	mariner transposase	VEuPathDB	no
DS113178	386470	386502	-	32	TVAG_071700	50S ribosomal protein L3, putative	VEuPathDB	no
DS113178	390884	390921	+	37	TVAG_071720	conserved hypothetical protein	VEuPathDB	no
DS113178	434612	434713	-	101	TVAG_071920	40S ribosomal protein S23, putative	VEuPathDB	yes
DS113178	436516	436650	+	134	TVAG_071930	kelch repeat domain, putative	VEuPathDB	no
DS113178	459480	459497	-	17	TVAG_071990	conserved hypothetical protein	VEuPathDB	no
DS113178	487936	487947	-	11	TVAG_072100	glutamate dehydrogenase, putative	VEuPathDB	no
DS113178	491879	491904	-	25	TVAG_072120	conserved hypothetical protein	VEuPathDB	no
DS113178	496262	496288	+	26	TVAG_072140	conserved hypothetical protein	VEuPathDB	no
DS113179	37189	37222	+	33	TVAG_184870	hypothetical protein	VEuPathDB	yes
DS113179	94786	94838	+	52	TVAG_185070	conserved hypothetical protein	VEuPathDB	no
DS113179	95041	95069	-	28	TVAG_185080	ran, putative	VEuPathDB	no
DS113179	109422	109572	+	150	TVAG_185160	60S ribosomal protein L19, putative	VEuPathDB	yes
DS113179	109993	110041	-	48	TVAG_185170	60S ribosomal protein L19, putative	VEuPathDB	no
DS113179	113356	113373	+	17	TVAG_185180	60S ribosomal protein L19, putative	VEuPathDB	no
DS113179	114765	114775	-	10	TVAG_185200	Family T1, proteasome alpha subunit, threonine peptidase	VEuPathDB	no
DS113179	117499	117503	-	4	TVAG_185220	conserved hypothetical protein	VEuPathDB	no
DS113179	139017	139107	-	90	TVAG_185340	Rab32, putative	VEuPathDB	no
DS113179	141092	141403	-	311	TVAG_185360	conserved hypothetical protein	VEuPathDB	yes
DS113179	180053	180332	-	279	TVAG_185520	conserved hypothetical protein	VEuPathDB	no
DS113179	188459	188462	-	3	TVAG_185530	ankyrin repeat-containing protein, putative	VEuPathDB	no
DS113179	192085	192138	-	53	TVAG_185540	Clan CD, family C13, legumain-like cysteine peptidase	VEuPathDB	no
DS113179	196286	196501	-	215	TVAG_185560	programmed cell death, putative	VEuPathDB	yes
DS113179	218445	218478	+	33	TVAG_185620	conserved hypothetical protein	VEuPathDB	no
DS113179	220415	220917	-	502	TVAG_185640	hypothetical protein	VEuPathDB	yes
DS113179	222541	222622	+	81	TVAG_185650	hypothetical protein	VEuPathDB	no
DS113179	236061	236113	-	52	TVAG_185740	conserved hypothetical protein	VEuPathDB	yes
DS113179	251440	251509	-	69	TVAG_185810	conserved hypothetical protein	VEuPathDB	no
DS113179	254270	254315	-	45	TVAG_185830	skd/vacuolar sorting, putative	VEuPathDB	no
DS113179	262272	262328	+	56	TVAG_185860	hypothetical protein	VEuPathDB	no
DS113179	264872	264876	-	4	TVAG_185870	histone deacetylase, putative	VEuPathDB	no
DS113179	268451	268519	+	68	TVAG_185880	60S ribosomal protein L35a, putative	VEuPathDB	yes
DS113179	270616	270648	-	32	TVAG_185900	conserved hypothetical protein	VEuPathDB	no
DS113179	305457	305535	-	78	TVAG_185980	conserved hypothetical protein	VEuPathDB	no
DS113179	313107	313131	-	24	TVAG_186020	RAB, putative	VEuPathDB	no
DS113179	336550	336603	-	53	TVAG_186110	hypothetical protein	VEuPathDB	no
DS113179	358386	358430	-	44	TVAG_186180	chaperone protein DNAj, putative	VEuPathDB	no
DS113179	399488	399628	-	140	TVAG_186290	leucine-rich repeat protein, BspA family	VEuPathDB	no
DS113179	404672	404799	-	127	TVAG_186300	leucine-rich repeat protein, BspA family	VEuPathDB	no
DS113179	414053	414118	+	65	TVAG_186310	leucine-rich repeat protein, BspA family	VEuPathDB	no
DS113179	436154	436164	+	10	TVAG_186350	leucine-rich repeat protein, BspA family	VEuPathDB	no
DS113179	438489	438529	-	40	TVAG_186380	conserved hypothetical protein	VEuPathDB	no
DS113179	485893	485923	+	30	TVAG_186530	DNA-directed RNA polymerase subunit rpb8, putative	VEuPathDB	no
DS113179	486087	486153	-	66	TVAG_186540	hypothetical protein	VEuPathDB	no
DS113179	488576	488627	+	51	TVAG_186550	C-MYB, putative	VEuPathDB	no
DS113179	489578	489643	-	65	TVAG_186560	conserved hypothetical protein	VEuPathDB	no
DS113180	1766	1798	-	32	TVAG_182130	conserved hypothetical protein	VEuPathDB	no
DS113180	3814	3842	-	28	TVAG_182140	hypothetical protein	VEuPathDB	no
DS113180	5482	5562	+	80	TVAG_182150	conserved hypothetical protein	VEuPathDB	yes
DS113180	12694	12699	+	5	TVAG_182190	conserved hypothetical protein	VEuPathDB	no
DS113180	20574	20633	+	59	TVAG_182230	hypothetical protein	VEuPathDB	no
DS113180	45638	45667	-	29	TVAG_182340	grpe protein, putative	VEuPathDB	no
DS113180	50782	50841	-	59	TVAG_182370	chaperonin containing t-complex protein 1, gamma subunit, tcpg, putative	VEuPathDB	yes
DS113180	69239	69255	-	16	TVAG_182460	RNA lariat debranching enzyme, putative	VEuPathDB	no
DS113180	79079	79210	+	131	TVAG_182480	PIKK family atypical protein kinase	VEuPathDB	no
DS113180	89734	89829	+	95	TVAG_TEG_DS113180_1_1	mariner transposase	VEuPathDB	no
DS113180	92074	92145	-	71	TVAG_182520	60S ribosomal protein L13, putative	VEuPathDB	no
DS113180	105510	105551	+	41	TVAG_182590	hypothetical protein	VEuPathDB	no
DS113180	110087	110100	-	13	TVAG_182620	nitrate, fromate, iron dehydrogenase, putative	VEuPathDB	no
DS113180	132216	132252	-	36	TVAG_182690	synoviolin, putative	VEuPathDB	no
DS113180	138974	139054	+	80	TVAG_182700	conserved hypothetical protein	VEuPathDB	yes
DS113180	159829	159830	+	1	TVAG_182750	conserved hypothetical protein	VEuPathDB	no
DS113180	170377	170455	-	78	TVAG_182810	ribosomal protein S9, putative	VEuPathDB	yes
DS113180	174148	174174	-	26	TVAG_182840	Keratin-associated protein 5-7, putative	VEuPathDB	no
DS113180	176566	176573	-	7	TVAG_182860	flagellar radial spoke, putative	VEuPathDB	no
DS113180	183392	183632	-	240	TVAG_182890	ankyrin repeat-containing protein, putative	VEuPathDB	no
DS113180	185456	185477	-	21	TVAG_182900	conserved hypothetical protein	VEuPathDB	no
DS113180	196557	196576	-	19	TVAG_182950	Micronuclear linker histone polyprotein (MIC LH) [Contains: Micronuclear linker histone-alpha	VEuPathDB	no
DS113180	199736	199760	+	24	TVAG_182960	hypothetical protein	VEuPathDB	no
DS113180	201569	201616	+	47	TVAG_182970	histone deacetylase 1, 2 ,3, putative	VEuPathDB	no
DS113180	206498	206513	+	15	TVAG_182980	conserved hypothetical protein	VEuPathDB	no
DS113180	216078	216143	+	65	TVAG_182990	hypothetical protein	VEuPathDB	no
DS113180	225719	225866	-	147	TVAG_183050	hypothetical protein	VEuPathDB	no
DS113180	236237	236358	+	121	TVAG_183100	ankyrin repeat-cotaining protein, putative	VEuPathDB	no
DS113180	238173	238245	+	72	TVAG_183110	arf-GTPase activating protein, putative	VEuPathDB	no
DS113180	245052	245071	-	19	TVAG_183150	Receptor expression-enhancing protein, putative	VEuPathDB	no
DS113180	287288	287304	-	16	TVAG_183300	aminotransferase class V, putative	VEuPathDB	no
DS113180	315092	315488	-	396	TVAG_183410	hypothetical protein	VEuPathDB	no
DS113180	325923	326330	-	407	TVAG_183470	hypothetical protein	VEuPathDB	no
DS113180	331575	331641	+	66	TVAG_183500	succinate thiokinase, beta subunit	VEuPathDB	yes
DS113180	334854	334895	+	41	TVAG_183510	conserved hypothetical protein	VEuPathDB	yes
DS113180	370840	370909	-	69	TVAG_183630	hypothetical protein	VEuPathDB	no
DS113180	409558	409606	-	48	TVAG_183730	ctl transporter, putative	VEuPathDB	no
DS113180	417858	417913	+	55	TVAG_183760	leucine-rich repeat protein, BspA family	VEuPathDB	no
DS113180	420088	420205	+	117	TVAG_183780	hypothetical protein	VEuPathDB	no
DS113180	420311	420341	-	30	TVAG_183790	malic enzyme, putative	VEuPathDB	no
DS113180	427136	427301	-	165	TVAG_183820	conserved hypothetical protein	VEuPathDB	no
DS113180	428306	428513	-	207	TVAG_183830	conserved hypothetical protein	VEuPathDB	no
DS113180	434577	434587	+	10	TVAG_183840	AGC family protein kinase	VEuPathDB	yes
DS113180	472516	472610	-	94	TVAG_184030	hypothetical protein	VEuPathDB	no
DS113180	473411	473447	-	36	TVAG_184040	conserved hypothetical protein	VEuPathDB	no
DS113181	7255	7289	-	34	TVAG_075460	Rab5b, putative	VEuPathDB	no
DS113181	61787	61849	+	62	TVAG_075580	conserved hypothetical protein	VEuPathDB	no
DS113181	100647	100760	+	113	TVAG_075750	hypothetical protein	VEuPathDB	no
DS113181	107732	107782	+	50	TVAG_075770	hypothetical protein	VEuPathDB	no
DS113181	165277	165338	-	61	TVAG_076030	Cylicin-1, putative	VEuPathDB	no
DS113181	170103	171043	+	940	TVAG_TEG_DS113181_7_1	mariner transposase	VEuPathDB	no
DS113181	200091	200140	+	49	TVAG_076150	ribosomal protein S15p/S13e, putative	VEuPathDB	no
DS113181	200700	200750	+	50	TVAG_076160	hypothetical protein	VEuPathDB	no
DS113181	201192	201199	-	7	TVAG_076170	26S proteasome regulatory subunit S3, putative	VEuPathDB	yes
DS113181	215773	215896	-	123	TVAG_076230	nucleotide binding protein, putative	VEuPathDB	no
DS113181	223827	223858	-	31	TVAG_076270	MYB-1, putative	VEuPathDB	no
DS113181	243221	243262	+	41	TVAG_076340	hypothetical protein	VEuPathDB	no
DS113181	247930	247949	+	19	TVAG_076360	conserved hypothetical protein	VEuPathDB	no
DS113181	248014	248068	-	54	TVAG_076370	ribosomal protein L39e, putative	VEuPathDB	no
DS113181	255488	255515	+	27	TVAG_076410	60S ribosomal protein L31, putative	VEuPathDB	no
DS113181	279542	279601	-	59	TVAG_076510	2-amino-3-ketobutyrate coenzyme A ligase, putative	VEuPathDB	no
DS113181	299607	299743	-	136	TVAG_076590	hypothetical protein	VEuPathDB	no
DS113181	328627	329567	+	940	TVAG_TEG_DS113181_9_1	mariner transposase	VEuPathDB	no
DS113181	340655	340693	-	38	TVAG_076800	conserved hypothetical protein	VEuPathDB	no
DS113181	356969	356993	+	24	TVAG_076890	ubiquitin-conjugating enzyme E2t, putative	VEuPathDB	no
DS113181	358441	358543	-	102	TVAG_076910	conserved hypothetical protein	VEuPathDB	no
DS113181	382875	382895	+	20	TVAG_076980	conserved hypothetical protein	VEuPathDB	no
DS113181	386196	386375	+	179	TVAG_077000	conserved hypothetical protein	VEuPathDB	no
DS113181	386852	386899	-	47	TVAG_077010	conserved hypothetical protein	VEuPathDB	no
DS113181	397202	397217	+	15	TVAG_077030	hypothetical protein	VEuPathDB	no
DS113181	416201	416289	-	88	TVAG_077140	conserved hypothetical protein	VEuPathDB	no
DS113181	424800	424834	-	34	TVAG_077200	conserved hypothetical protein	VEuPathDB	no
DS113181	430550	430599	-	49	TVAG_077220	homeobox protein, putative	VEuPathDB	no
DS113182	24868	24888	+	20	TVAG_475500	r2r3-MYB transcription factor, putative	VEuPathDB	yes
DS113182	32260	32280	-	20	TVAG_475540	conserved hypothetical protein	VEuPathDB	no
DS113182	56005	56010	+	5	TVAG_475640	ankyrin repeat-containing protein, putative	VEuPathDB	no
DS113182	142718	142729	+	11	TVAG_476020	vesicular-fusion protein nsf, putative	VEuPathDB	no
DS113182	147680	148205	+	525	TVAG_476070	conserved hypothetical protein	VEuPathDB	no
DS113182	153446	153463	-	17	TVAG_476100	glyceraldehyde 3-phosphate dehydrogenase, putative	VEuPathDB	no
DS113182	159650	159666	-	16	TVAG_476140	peptidylprolyl isomerase, putative	VEuPathDB	no
DS113182	163591	163638	+	47	TVAG_476160	Clan MG, familly M24, aminopeptidase P-like metallopeptidase	VEuPathDB	no
DS113182	173773	173851	-	78	TVAG_TEG_DS113182_2_1	Kolobok-5_Kolobok/PhamA5 transposable element protein	VEuPathDB	no
DS113182	188118	188179	+	61	TVAG_476310	clathrin coat adaptor ap3 medium chain, putative	VEuPathDB	no
DS113182	194088	194162	-	74	TVAG_476350	conserved hypothetical protein	VEuPathDB	no
DS113182	202398	202443	+	45	TVAG_476400	hypothetical protein	VEuPathDB	no
DS113182	257544	257645	-	101	TVAG_476550	conserved hypothetical protein	VEuPathDB	no
DS113182	259032	259267	+	235	TVAG_476560	conserved hypothetical protein	VEuPathDB	no
DS113182	281913	281938	+	25	TVAG_476670	conserved hypothetical protein	VEuPathDB	no
DS113182	299235	299534	+	299	TVAG_476770	ribosomal protein, small subunit protein, putative	VEuPathDB	yes
DS113182	301856	302300	-	444	TVAG_476800	leucine rich repeat-containing protein, putative	VEuPathDB	no
DS113182	311773	311814	+	41	TVAG_476810	60S ribosomal protein L4, putative	VEuPathDB	no
DS113182	317565	317651	-	86	TVAG_476850	SNAP190, putative	VEuPathDB	yes
DS113182	336518	336544	+	26	TVAG_476890	hypothetical protein	VEuPathDB	no
DS113182	341408	341535	-	127	TVAG_476930	ankyrin repeat-containing protein, putative	VEuPathDB	no
DS113182	357186	357267	+	81	TVAG_477000	conserved hypothetical protein	VEuPathDB	yes
DS113182	369002	369041	+	39	TVAG_477030	neurobeachin, putative	VEuPathDB	no
DS113182	390568	390617	+	49	TVAG_477120	Rab9, putative	VEuPathDB	yes
DS113182	405090	405108	+	18	TVAG_477180	Clan MA, family M3, oligopeptidase A-like metallopeptidase	VEuPathDB	no
DS113182	414578	414686	+	108	TVAG_477210	conserved hypothetical protein	VEuPathDB	no
DS113182	426739	426749	-	10	TVAG_477240	rap GTPase-activating protein, putative	VEuPathDB	no
DS113183	102929	102946	+	17	TVAG_035110	ankyrin 2,3/unc44, putative	VEuPathDB	no
DS113183	103806	103906	+	100	TVAG_035120	60S ribosomal protein L44, putative	VEuPathDB	yes
DS113183	112608	112871	-	263	TVAG_035180	arp2/3 complex subunit, putative	VEuPathDB	yes
DS113183	115150	115685	-	535	TVAG_035190	fetal globin-inducing factor, putative	VEuPathDB	yes
DS113183	132127	132787	+	660	TVAG_TEG_DS113183_1_1	mariner transposase	VEuPathDB	no
DS113183	133907	134280	+	373	TVAG_TEG_DS113183_3_1	mariner transposase	VEuPathDB	no
DS113183	140134	140180	+	46	TVAG_035320	hypothetical protein	VEuPathDB	no
DS113183	140701	140764	-	63	TVAG_035330	26S protease regulatory subunit, putative	VEuPathDB	yes
DS113183	148536	148613	-	77	TVAG_035370	Rab23, putative	VEuPathDB	yes
DS113183	157288	157376	+	88	TVAG_035410	translation initiation inhibitor, putative	VEuPathDB	no
DS113183	169126	169266	-	140	TVAG_035440	TKL family protein kinase	VEuPathDB	no
DS113183	205287	205385	+	98	TVAG_035540	conserved hypothetical protein	VEuPathDB	no
DS113183	236532	236604	-	72	TVAG_035690	TKL family protein kinase	VEuPathDB	no
DS113183	242499	242723	+	224	TVAG_035700	hypothetical protein	VEuPathDB	no
DS113183	254286	254340	-	54	TVAG_035750	serine/threonine protein phosphatase, putative	VEuPathDB	no
DS113183	288043	288146	+	103	TVAG_035840	Clan SB, family S8, subtilisin-like serine peptidase	VEuPathDB	no
DS113183	294986	295034	-	48	TVAG_035870	leucine-rich repeat protein, BspA family	VEuPathDB	no
DS113183	301658	301732	+	74	TVAG_035880	hypothetical protein	VEuPathDB	no
DS113183	315717	315758	-	41	TVAG_035950	conserved hypothetical protein	VEuPathDB	no
DS113183	320632	320687	-	55	TVAG_035980	pc-MYB2, putative	VEuPathDB	no
DS113183	336547	336601	+	54	TVAG_036010	A-type flavoprotein	VEuPathDB	no
DS113183	366111	366181	+	70	TVAG_036130	conserved hypothetical protein	VEuPathDB	no
DS113183	376920	376948	+	28	TVAG_036180	hypothetical protein	VEuPathDB	no
DS113183	379940	380028	+	88	TVAG_036210	nascent polypeptide associated complex alpha subunit, putative	VEuPathDB	yes
DS113183	380831	380903	+	72	TVAG_036220	ribosomal protein S9, putative	VEuPathDB	yes
DS113183	381113	381185	-	72	TVAG_036230	RAB, putative	VEuPathDB	no
DS113183	382353	382444	-	91	TVAG_036240	conserved hypothetical protein	VEuPathDB	no
DS113183	394201	394293	+	92	TVAG_036270	hypothetical protein	VEuPathDB	no
DS113183	395572	395588	+	16	TVAG_036280	conserved hypothetical protein	VEuPathDB	no
DS113183	396261	396322	-	61	TVAG_036300	ribosomal protein S9, putative	VEuPathDB	yes
DS113183	401493	401551	+	58	TVAG_036320	AGC family protein kinase	VEuPathDB	yes
DS113183	424224	424389	+	165	TVAG_036410	conserved hypothetical protein	VEuPathDB	no
DS113183	425057	425689	+	632	TVAG_TEG_DS113183_7_1	mariner transposase	VEuPathDB	no
DS113184	1178	1280	+	102	TVAG_377740	conserved hypothetical protein	VEuPathDB	no
DS113184	1840	1870	+	30	TVAG_377750	conserved hypothetical protein	VEuPathDB	no
DS113184	17102	17105	+	3	TVAG_377810	adaptin, alpha/gamma/epsilon, putative	VEuPathDB	yes
DS113184	17432	17499	-	67	TVAG_377820	conserved hypothetical protein	VEuPathDB	no
DS113184	22297	22607	+	310	TVAG_377840	conserved hypothetical protein	VEuPathDB	no
DS113184	23340	23348	+	8	TVAG_377850	hypothetical protein	VEuPathDB	no
DS113184	31526	31713	+	187	TVAG_377880	hypothetical protein	VEuPathDB	no
DS113184	35654	35733	-	79	TVAG_377890	MYB, putative	VEuPathDB	no
DS113184	79548	79706	+	158	TVAG_378010	hypothetical protein	VEuPathDB	no
DS113184	119122	119235	-	113	TVAG_378180	60S ribosomal protein L12, putative	VEuPathDB	yes
DS113184	229452	229550	+	98	TVAG_378510	MYB119, putative	VEuPathDB	no
DS113184	233330	233359	-	29	TVAG_378530	hypothetical protein	VEuPathDB	no
DS113184	243048	243070	-	22	TVAG_378570	histidinol-phosphate aminotransferase, putative	VEuPathDB	no
DS113184	301225	301231	+	6	TVAG_378830	conserved hypothetical protein	VEuPathDB	no
DS113184	331794	331864	-	70	TVAG_378930	vacuolar sorting protein vps29, putative	VEuPathDB	no
DS113184	334576	334614	+	38	TVAG_378940	vesicle protein sorting-associated, putative	VEuPathDB	no
DS113184	341016	341044	+	28	TVAG_378970	40S ribosomal protein S27, putative	VEuPathDB	yes
DS113184	341335	341349	-	14	TVAG_378980	rubrerythrin, putative	VEuPathDB	no
DS113184	347331	347418	+	87	TVAG_379010	MYB72, putative	VEuPathDB	no
DS113184	361434	361490	-	56	TVAG_379050	conserved hypothetical protein	VEuPathDB	no
DS113184	375802	375822	-	20	TVAG_379120	conserved hypothetical protein	VEuPathDB	yes
DS113184	380529	380552	-	23	TVAG_379140	ankyrin repeat domain protein, putative	VEuPathDB	no
DS113184	412782	412829	+	47	TVAG_379260	30S ribosomal protein S4e, putative	VEuPathDB	no
DS113185	6061	6126	-	65	TVAG_093060	Rabx30 protein, putative	VEuPathDB	no
DS113185	7132	7226	-	94	TVAG_093070	bromodomain-containing protein, putative	VEuPathDB	no
DS113185	31008	31070	-	62	TVAG_093180	conserved hypothetical protein	VEuPathDB	no
DS113185	116154	116239	-	85	TVAG_093590	hypothetical protein	VEuPathDB	no
DS113185	116900	116950	-	50	TVAG_093600	60S ribosomal protein L23a, putative	VEuPathDB	yes
DS113185	133752	133883	+	131	TVAG_093670	ankyrin repeat-containing protein, putative	VEuPathDB	no
DS113185	163029	163138	-	109	TVAG_093760	hypothetical protein	VEuPathDB	no
DS113185	204324	204371	+	47	TVAG_093890	conserved hypothetical protein	VEuPathDB	no
DS113185	230595	230651	+	56	TVAG_094000	protein phsophatase-2A, putative	VEuPathDB	no
DS113185	236237	236317	-	80	TVAG_094030	conserved hypothetical protein	VEuPathDB	no
DS113185	244770	244838	-	68	TVAG_094060	f-actin capping protein beta subunit, putative	VEuPathDB	yes
DS113185	249848	249866	-	18	TVAG_094080	conserved hypothetical protein	VEuPathDB	no
DS113185	255074	255263	-	189	TVAG_094110	lim domain, putative	VEuPathDB	yes
DS113185	276323	276397	-	74	TVAG_094150	conserved hypothetical protein	VEuPathDB	no
DS113185	304516	304537	+	21	TVAG_094250	conserved hypothetical protein	VEuPathDB	no
DS113185	362684	362766	+	82	TVAG_094480	conserved hypothetical protein	VEuPathDB	no
DS113185	405295	405334	-	39	TVAG_094630	glucosamine-6-phosphate isomerase, putative	VEuPathDB	no
DS113186	28573	28593	+	20	TVAG_456340	conserved hypothetical protein	VEuPathDB	yes
DS113186	31840	31874	+	34	TVAG_456360	hypothetical protein	VEuPathDB	no
DS113186	60082	60137	+	55	TVAG_456490	Clan CA, family C19, ubiquitin hydrolase-like cysteine peptidase	VEuPathDB	no
DS113186	102974	103013	-	39	TVAG_456660	conserved hypothetical protein	VEuPathDB	no
DS113186	131173	131206	-	33	TVAG_456770	iron-sulfur cluster assembly protein, putative	VEuPathDB	no
DS113186	137189	137223	-	34	TVAG_456790	conserved hypothetical protein	VEuPathDB	no
DS113186	173756	173831	-	75	TVAG_456910	Rabx32 protein, putative	VEuPathDB	no
DS113186	175321	175357	-	36	TVAG_456920	tubulin alpha chain, putative	VEuPathDB	no
DS113186	214267	214268	-	1	TVAG_457010	conserved hypothetical protein	VEuPathDB	yes
DS113186	220228	220241	+	13	TVAG_457030	protein disulfide isomerase, putative	VEuPathDB	no
DS113186	222897	222975	-	78	TVAG_457060	disheveled associated activator of morphogenesis, putative	VEuPathDB	no
DS113186	228742	228800	-	58	TVAG_457070	conserved hypothetical protein	VEuPathDB	no
DS113186	279353	279394	-	41	TVAG_457240	Clan CA, family C40, NlpC/P60 superfamily cysteine peptidase	VEuPathDB	no
DS113186	280818	280831	-	13	TVAG_457250	group II pyridoxal-5-phosphate decarboxylase, putative	VEuPathDB	no
DS113186	293009	293475	+	466	TVAG_457280	leucine-rich repeat protein, BspA family	VEuPathDB	no
DS113186	346554	346614	-	60	TVAG_457430	ubiquitin 1, putative	VEuPathDB	no
DS113186	353744	353764	-	20	TVAG_457480	conserved hypothetical protein	VEuPathDB	no
DS113186	392088	392104	-	16	TVAG_RG_DS113186_10	caldesmon, putative	VEuPathDB	no
DS113187	30211	30656	-	445	TVAG_248930	ankyrin repeat-containing protein, putative	VEuPathDB	no
DS113187	43200	43219	+	19	TVAG_248980	mmr1/hsr1 GTP binding protein, putative	VEuPathDB	no
DS113187	49570	49629	+	59	TVAG_249000	conserved hypothetical protein	VEuPathDB	no
DS113187	59029	59121	-	92	TVAG_249050	ras GTP exchange factor, son of sevenless, putative	VEuPathDB	no
DS113187	63592	64385	-	793	TVAG_TEG_DS113187_1_1	mariner transposase	VEuPathDB	no
DS113187	69509	69546	+	37	TVAG_249080	snare proteins, putative	VEuPathDB	no
DS113187	69895	69953	-	58	TVAG_249090	40S ribosomal protein S23, putative	VEuPathDB	no
DS113187	79826	79869	+	43	TVAG_249130	hypothetical protein	VEuPathDB	no
DS113187	111225	111245	+	20	TVAG_249200	actin, putative	VEuPathDB	no
DS113187	111297	111837	-	540	TVAG_249210	hypothetical protein	VEuPathDB	no
DS113187	116461	116543	-	82	TVAG_249230	ankyrin 2,3/unc44, putative	VEuPathDB	no
DS113187	123834	124151	+	317	TVAG_249240	O-linked N-acetylglucosamine transferase, ogt, putative	VEuPathDB	no
DS113187	133410	133486	+	76	TVAG_249270	r2r3-MYB transcription factor, putative	VEuPathDB	no
DS113187	153124	153158	+	34	TVAG_249360	conserved hypothetical protein	VEuPathDB	no
DS113187	153696	153770	-	74	TVAG_249370	conserved hypothetical protein	VEuPathDB	no
DS113187	199395	199440	-	45	TVAG_249580	conserved hypothetical protein	VEuPathDB	no
DS113187	239261	239282	-	21	TVAG_249740	60S ribosomal protein L10a, putative	VEuPathDB	no
DS113187	253989	254065	-	76	TVAG_249820	conserved hypothetical protein	VEuPathDB	no
DS113187	261440	261513	+	73	TVAG_249850	RNAse L inhibitor, putative	VEuPathDB	no
DS113187	313908	313968	-	60	TVAG_RG_DS113187_14	conserved hypothetical protein	VEuPathDB	no
DS113187	317680	317716	-	36	TVAG_250040	Exosome complex exonuclease RRP41, putative	VEuPathDB	yes
DS113188	6702	6856	-	154	TVAG_236970	conserved hypothetical protein	VEuPathDB	no
DS113188	20740	20769	+	29	TVAG_237000	SNAP190, putative	VEuPathDB	no
DS113188	60009	60182	+	173	TVAG_237090	MYB45, putative	VEuPathDB	yes
DS113188	68313	68317	+	4	TVAG_237110	neutral alpha-glucosidase ab precursor, putative	VEuPathDB	no
DS113188	75349	75408	+	59	TVAG_237140	heat shock protein, putative	VEuPathDB	no
DS113188	89975	90026	-	51	TVAG_237220	60S ribosomal protein L26, putative	VEuPathDB	yes
DS113188	105489	105515	+	26	TVAG_237280	ctl transporter, putative	VEuPathDB	no
DS113188	114210	114259	-	49	TVAG_237330	bsu-protein phosphatase, putative	VEuPathDB	no
DS113188	117925	117963	-	38	TVAG_237350	fidipidine, putative	VEuPathDB	no
DS113188	143018	143170	-	152	TVAG_237470	conserved hypothetical protein	VEuPathDB	yes
DS113188	149170	150110	-	940	TVAG_TEG_DS113188_1_1	mariner transposase	VEuPathDB	no
DS113188	179947	180060	+	113	TVAG_237680	ADP,ATP carrier protein, putative	VEuPathDB	yes
DS113188	180296	180310	-	14	TVAG_237690	villin 1-4, putative	VEuPathDB	no
DS113188	184628	184977	-	349	TVAG_237700	conserved hypothetical protein	VEuPathDB	no
DS113188	192656	192680	-	24	TVAG_237720	DNA-binding protein reb1, putative	VEuPathDB	no
DS113188	197928	198001	+	73	TVAG_237740	conserved hypothetical protein	VEuPathDB	yes
DS113188	204095	204116	+	21	TVAG_237760	axonemal dynein intermediate chain, putative	VEuPathDB	no
DS113188	234621	234803	-	182	TVAG_237910	conserved hypothetical protein	VEuPathDB	no
DS113188	242113	242181	+	68	TVAG_237920	conserved hypothetical protein	VEuPathDB	no
DS113188	242398	242418	-	20	TVAG_237930	WD-repeat protein YNL006W, putative	VEuPathDB	no
DS113188	245188	245230	-	42	TVAG_237950	conserved hypothetical protein	VEuPathDB	no
DS113188	286907	286968	+	61	TVAG_238120	vacuolar protein sorting-associated protein vps25, putative	VEuPathDB	no
DS113188	297713	297817	+	104	TVAG_238210	hypothetical protein	VEuPathDB	no
DS113188	337565	337635	+	70	TVAG_238350	phosphatidylinositol transfer protein, putative	VEuPathDB	no
DS113188	388602	388705	-	103	TVAG_RG_DS113188_33	conserved hypothetical protein	VEuPathDB	no
DS113189	3087	3130	+	43	TVAG_012930	conserved hypothetical protein	VEuPathDB	no
DS113189	20145	20177	-	32	TVAG_013010	Family T1, proteasome beta subunit, threonine peptidase	VEuPathDB	no
DS113189	33077	33115	-	38	TVAG_013060	60S ribosomal protein L3, putative	VEuPathDB	no
DS113189	47356	48151	+	795	TVAG_TEG_DS113189_2_1	mariner transposase	VEuPathDB	no
DS113189	132139	132165	+	26	TVAG_013410	hypothetical protein	VEuPathDB	no
DS113189	147805	147866	+	61	TVAG_013450	Periplasmic beta-glucosidase precursor, putative	VEuPathDB	yes
DS113189	210676	210727	-	51	TVAG_013750	coiled-coil domain-containing protein, putative	VEuPathDB	no
DS113189	242428	242483	+	55	TVAG_013830	tetratricopeptide repeat protein, tpr, putative	VEuPathDB	no
DS113189	246690	246848	+	158	TVAG_013870	60S ribosomal protein L35, putative	VEuPathDB	yes
DS113189	254031	254114	-	83	TVAG_013920	conserved hypothetical protein	VEuPathDB	no
DS113189	282795	282921	-	126	TVAG_014020	conserved hypothetical protein	VEuPathDB	no
DS113189	286283	286325	-	42	TVAG_014040	trichohyalin, putative	VEuPathDB	no
DS113189	309983	310031	-	48	TVAG_014140	N-linked oligosaccharide processing, putative	VEuPathDB	no
DS113189	346277	346331	+	54	TVAG_014250	conserved hypothetical protein	VEuPathDB	no
DS113190	11028	11045	-	17	TVAG_198060	conserved hypothetical protein	VEuPathDB	no
DS113190	22174	22282	+	108	TVAG_198090	conserved hypothetical protein	VEuPathDB	yes
DS113190	22554	22586	-	32	TVAG_198100	40S ribosomal protein S2, putative	VEuPathDB	no
DS113190	23798	23838	-	40	TVAG_198110	pyruvate-flavodoxin oxidoreductase, putative	VEuPathDB	no
DS113190	34185	34247	-	62	TVAG_198140	conserved hypothetical protein	VEuPathDB	no
DS113190	48806	48881	+	75	TVAG_198180	conserved hypothetical protein	VEuPathDB	no
DS113190	59813	59932	+	119	TVAG_198230	conserved hypothetical protein	VEuPathDB	no
DS113190	60213	60220	-	7	TVAG_198240	pc-MYB2, putative	VEuPathDB	no
DS113190	67743	67980	-	237	TVAG_198290	ubiquitin-conjugating enzyme E2-25kD, putative	VEuPathDB	yes
DS113190	69444	69533	+	89	TVAG_198300	hypothetical protein	VEuPathDB	yes
DS113190	81218	81261	+	43	TVAG_198370	conserved hypothetical protein	VEuPathDB	no
DS113190	90875	90974	-	99	TVAG_198430	14-3-3 protein sigma, gamma, zeta, beta/alpha, putative	VEuPathDB	yes
DS113190	116140	116143	+	3	TVAG_198530	conserved hypothetical protein	VEuPathDB	no
DS113190	133250	133280	+	30	TVAG_198600	DNA polymerase alpha catalytic subunit, putative	VEuPathDB	no
DS113190	136137	136186	+	49	TVAG_198620	40S ribosomal protein S23, putative	VEuPathDB	no
DS113190	142765	142813	-	48	TVAG_198670	hypothetical protein	VEuPathDB	no
DS113190	144343	144426	+	83	TVAG_198680	40S ribosomal protein S7, putative	VEuPathDB	yes
DS113190	149697	149716	-	19	TVAG_198710	c2h2 zinc finger protein, putative	VEuPathDB	no
DS113190	156172	156208	+	36	TVAG_198740	hypothetical protein	VEuPathDB	no
DS113190	207880	207918	-	38	TVAG_198960	60S ribosomal protein L9, putative	VEuPathDB	no
DS113190	215794	215857	-	63	TVAG_198980	conserved hypothetical protein	VEuPathDB	no
DS113190	239323	239362	+	39	TVAG_199100	40S ribosomal protein S7, putative	VEuPathDB	no
DS113190	242752	242872	-	120	TVAG_199130	ankyrin repeat domain protein, putative	VEuPathDB	no
DS113190	244704	245024	-	320	TVAG_199140	cardiac ankyrin repeat protein, putative	VEuPathDB	no
DS113190	251819	251847	+	28	TVAG_199180	conserved hypothetical protein	VEuPathDB	no
DS113190	261987	262025	+	38	TVAG_199220	hypothetical protein	VEuPathDB	no
DS113190	262808	262923	+	115	TVAG_199230	60S ribosomal protein L27a, putative	VEuPathDB	yes
DS113190	263978	264018	+	40	TVAG_199240	40S ribosomal protein S19, putative	VEuPathDB	no
DS113190	268951	268991	+	40	TVAG_199270	60S ribosomal protein L7a, putative	VEuPathDB	no
DS113190	270013	270087	+	74	TVAG_199280	hypothetical protein	VEuPathDB	no
DS113190	338791	338822	-	31	TVAG_199520	hypothetical protein	VEuPathDB	no
DS113190	344288	344430	+	142	TVAG_199550	conserved hypothetical protein	VEuPathDB	yes
DS113190	345818	345833	+	15	TVAG_199560	conserved hypothetical protein	VEuPathDB	no
DS113190	349018	349072	+	54	TVAG_199580	conserved hypothetical protein	VEuPathDB	no
DS113191	43446	43469	-	23	TVAG_166180	Clan CA, family C19, ubiquitin hydrolase-like cysteine peptidase	VEuPathDB	no
DS113191	47275	47319	+	44	TVAG_166200	conserved hypothetical protein	VEuPathDB	no
DS113191	80978	81006	-	28	TVAG_166320	conserved hypothetical protein	VEuPathDB	no
DS113191	90264	90555	+	291	TVAG_166350	profilin, putative	VEuPathDB	no
DS113191	102514	102562	-	48	TVAG_166430	hypothetical protein	VEuPathDB	no
DS113191	155933	155950	+	17	TVAG_166600	3-deoxy-D-manno-octulosonic-acid transferase/tRNA (guanine-N(7)-)-methyltransferase, putative	VEuPathDB	no
DS113191	197520	197580	-	60	TVAG_166770	conserved hypothetical protein	VEuPathDB	no
DS113191	217836	217866	+	30	TVAG_166850	conserved hypothetical protein	VEuPathDB	no
DS113191	242403	242414	+	11	TVAG_166990	U3 small nucleolar ribonucleoprotein mpp10, putative	VEuPathDB	no
DS113191	256309	256402	-	93	TVAG_167040	Nudix hydrolase 14, mitochondrial precursor, putative	VEuPathDB	no
DS113191	281920	281997	-	77	TVAG_167130	Exoenzymes regulatory protein aepA precursor, putative	VEuPathDB	no
DS113191	319517	319545	+	28	TVAG_167250	chaperonin, putative	VEuPathDB	no
DS113191	336600	336643	-	43	TVAG_167310	eukaryotic translation initiation factor, putative	VEuPathDB	no
DS113191	338722	338844	+	122	TVAG_167320	nucleoside diphosphate kinase, putative	VEuPathDB	yes
DS113191	351580	351627	-	47	TVAG_167390	hypothetical protein	VEuPathDB	no
DS113192	20469	20983	-	514	TVAG_282600	nf kappa B inhibitor I-kappa-B, putative	VEuPathDB	no
DS113192	37724	37779	+	55	TVAG_282690	conserved hypothetical protein	VEuPathDB	no
DS113192	41653	41693	-	40	TVAG_282720	serine/threonine-protein phosphatase 2A 65 kDa regulatory subunit A beta isoform, putative	VEuPathDB	no
DS113192	50398	50440	-	42	TVAG_282760	hypothetical protein	VEuPathDB	no
DS113192	54470	54522	+	52	TVAG_282770	hypothetical protein	VEuPathDB	no
DS113192	107522	107537	+	15	TVAG_282930	CAMK family protein kinase	VEuPathDB	no
DS113192	109926	110025	-	99	TVAG_282950	conserved hypothetical protein	VEuPathDB	no
DS113192	111377	111395	-	18	TVAG_282960	40S ribosomal protein S6, putative	VEuPathDB	no
DS113192	119098	119245	+	147	TVAG_282990	conserved hypothetical protein	VEuPathDB	yes
DS113192	126340	126380	+	40	TVAG_283020	initiation factor 5A, putative	VEuPathDB	yes
DS113192	142236	142279	-	43	TVAG_283090	autophagy protein, putative	VEuPathDB	no
DS113192	144810	144853	+	43	TVAG_283100	conserved hypothetical protein	VEuPathDB	no
DS113192	145936	146032	-	96	TVAG_283120	hypothetical protein	VEuPathDB	no
DS113192	146921	146929	-	8	TVAG_283130	conserved hypothetical protein	VEuPathDB	no
DS113192	158025	158131	-	106	TVAG_283180	hypothetical protein	VEuPathDB	no
DS113192	178914	178955	+	41	TVAG_283240	50S ribosomal protein l37ae, putative	VEuPathDB	no
DS113192	197094	197190	+	96	TVAG_283330	clathrin coat assembly protein ap19, putative	VEuPathDB	yes
DS113192	209580	209836	-	256	TVAG_TEG_DS113192_4_1	mariner transposase	VEuPathDB	no
DS113192	217062	217080	-	18	TVAG_283380	conserved hypothetical protein	VEuPathDB	no
DS113192	246799	246868	+	69	TVAG_283490	pelota, putative	VEuPathDB	no
DS113192	274970	274978	+	8	TVAG_283610	conserved hypothetical protein	VEuPathDB	no
DS113193	11974	11979	-	5	TVAG_171960	26S proteasome non-ATPase regulatory subunit, putative	VEuPathDB	no
DS113193	78782	78878	+	96	TVAG_172190	conserved hypothetical protein	VEuPathDB	no
DS113193	79233	79267	-	34	TVAG_172200	conserved hypothetical protein	VEuPathDB	no
DS113193	87476	87546	-	70	TVAG_172240	DNA-directed RNA polymerase I largest subunit, putative	VEuPathDB	no
DS113193	140716	140785	+	69	TVAG_172460	DEAD box ATP-dependent RNA helicase, putative	VEuPathDB	no
DS113193	141071	141089	-	18	TVAG_172470	fetal globin-inducing factor, putative	VEuPathDB	no
DS113193	148995	149092	-	97	TVAG_172500	GTPase_rho, putative	VEuPathDB	no
DS113193	162008	162016	+	8	TVAG_172580	hypothetical protein	VEuPathDB	no
DS113193	197620	197650	+	30	TVAG_172680	actin, putative	VEuPathDB	no
DS113193	203974	204180	+	206	TVAG_172700	anaphase promoting complex subunit, putative	VEuPathDB	no
DS113193	231693	231749	+	56	TVAG_172830	ankyrin repeat domain protein, putative	VEuPathDB	no
DS113193	239422	239426	+	4	TVAG_172870	conserved hypothetical protein	VEuPathDB	yes
DS113193	251855	251921	+	66	TVAG_172930	conserved hypothetical protein	VEuPathDB	no
DS113193	255015	255027	-	12	TVAG_172960	rap GTPase-activating protein, putative	VEuPathDB	no
DS113194	8023	8068	-	45	TVAG_436400	conserved hypothetical protein	VEuPathDB	no
DS113194	28647	28680	-	33	TVAG_436530	Na+ driven multidrug efflux pump, putative	VEuPathDB	no
DS113194	31234	31331	-	97	TVAG_436540	conserved hypothetical protein	VEuPathDB	yes
DS113194	39620	39690	+	70	TVAG_436580	S.cerevisiae chromosome XII reading frame orf ylr008c, putative	VEuPathDB	no
DS113194	71812	71874	+	62	TVAG_436700	beta-amylase, putative	VEuPathDB	no
DS113194	75638	75671	+	33	TVAG_436720	Na+ driven multidrug efflux pump, putative	VEuPathDB	no
DS113194	78670	78762	-	92	TVAG_436740	conserved hypothetical protein	VEuPathDB	no
DS113194	108602	108631	-	29	TVAG_436840	dynamin, putative	VEuPathDB	no
DS113194	114687	114749	-	62	TVAG_436870	60S ribosomal protein L38, putative	VEuPathDB	yes
DS113194	121527	121595	+	68	TVAG_436890	hypothetical protein	VEuPathDB	no
DS113194	138725	138754	+	29	TVAG_436970	conserved hypothetical protein	VEuPathDB	no
DS113194	145736	145775	+	39	TVAG_437010	Rho/RAC guanine nucleotide exchange factor, putative	VEuPathDB	no
DS113194	147523	147557	-	34	TVAG_437020	50S ribosomal protein L10e, putative	VEuPathDB	no
DS113194	182591	182627	+	36	TVAG_437150	conserved hypothetical protein	VEuPathDB	no
DS113194	182824	182893	-	69	TVAG_437160	hypothetical protein	VEuPathDB	no
DS113194	196590	196643	-	53	TVAG_437190	hypothetical protein	VEuPathDB	no
DS113194	211854	211925	-	71	TVAG_437250	conserved hypothetical protein	VEuPathDB	no
DS113194	214733	214840	+	107	TVAG_437270	conserved hypothetical protein	VEuPathDB	no
DS113194	249710	249770	-	60	TVAG_437410	phosphoenolpyruvate-protein phosphotransferase, putative	VEuPathDB	no
DS113194	268397	269337	+	940	TVAG_TEG_DS113194_2_1	mariner transposase	VEuPathDB	no
DS113194	273172	273192	+	20	TVAG_437490	ankyrin repeat-containing protein, putative	VEuPathDB	no
DS113194	296026	296059	-	33	TVAG_437590	hym1 protein, putative	VEuPathDB	no
DS113195	57994	58027	-	33	TVAG_391100	Clan MA, family M8, leishmanolysin-like metallopeptidase	VEuPathDB	no
DS113195	62147	62198	-	51	TVAG_391120	calcium binding protein, putative	VEuPathDB	no
DS113195	93255	93681	+	426	TVAG_391230	hypothetical protein	VEuPathDB	no
DS113195	93716	93737	-	21	TVAG_391240	conserved hypothetical protein	VEuPathDB	no
DS113195	130212	130256	-	44	TVAG_391360	conserved hypothetical protein	VEuPathDB	no
DS113195	152834	152913	+	79	TVAG_391410	conserved hypothetical protein	VEuPathDB	no
DS113195	184355	184392	+	37	TVAG_391520	3-oxo-5-alpha-steroid 4-dehydrogenase, putative	VEuPathDB	no
DS113195	201284	201332	-	48	TVAG_391590	conserved hypothetical protein	VEuPathDB	no
DS113195	220819	220836	+	17	TVAG_391630	4-nitrophenylphosphatase, putative	VEuPathDB	no
DS113195	228042	228111	+	69	TVAG_391670	conserved hypothetical protein	VEuPathDB	no
DS113195	249022	249082	+	60	TVAG_391760	phosphofructokinase, putative	VEuPathDB	no
DS113195	260129	260543	+	414	TVAG_TEG_DS113195_4_1	mariner transposase	VEuPathDB	no
DS113195	278807	278835	+	28	TVAG_391870	threonine synthase, putative	VEuPathDB	no
DS113195	282830	282861	-	31	TVAG_391900	conserved hypothetical protein	VEuPathDB	no
DS113195	290504	290596	+	92	TVAG_391920	Rab7g protein, putative	VEuPathDB	no
DS113196	19195	19269	+	74	TVAG_162890	conserved hypothetical protein	VEuPathDB	no
DS113196	54090	54149	+	59	TVAG_162980	axonmeal dynein heavy chain, putative	VEuPathDB	no
DS113196	56790	56836	-	46	TVAG_163000	heat shock protein, putative	VEuPathDB	yes
DS113196	96886	96907	-	21	TVAG_163180	40S ribosomal protein S5, putative	VEuPathDB	yes
DS113196	97671	97758	-	87	TVAG_163190	conserved hypothetical protein	VEuPathDB	no
DS113196	101864	101902	+	38	TVAG_163210	40S ribosomal protein S5, putative	VEuPathDB	no
DS113196	110449	110468	-	19	TVAG_163250	conserved hypothetical protein	VEuPathDB	no
DS113196	114151	114171	-	20	TVAG_163260	conserved hypothetical protein	VEuPathDB	no
DS113196	131835	131892	+	57	TVAG_163320	conserved hypothetical protein	VEuPathDB	no
DS113196	133019	133025	+	6	TVAG_163330	hypothetical protein	VEuPathDB	yes
DS113196	144386	144421	-	35	TVAG_163360	hypothetical protein	VEuPathDB	yes
DS113196	154270	154365	+	95	TVAG_163420	hypothetical protein	VEuPathDB	yes
DS113196	158540	158631	+	91	TVAG_163440	40S ribosomal protein S5, putative	VEuPathDB	yes
DS113196	158886	158914	-	28	TVAG_163450	30S ribosomal protein S7p, putative	VEuPathDB	no
DS113196	165986	166024	-	38	TVAG_163490	hypothetical protein	VEuPathDB	no
DS113196	215949	216015	+	66	TVAG_163680	hypothetical protein	VEuPathDB	no
DS113196	237845	238127	+	282	TVAG_163750	conserved hypothetical protein	VEuPathDB	no
DS113196	243996	244028	+	32	TVAG_163790	UV excision repair protein rad23, putative	VEuPathDB	no
DS113196	269456	269528	+	72	TVAG_163880	hypothetical protein	VEuPathDB	no
DS113196	272209	272228	+	19	TVAG_163900	conserved hypothetical protein	VEuPathDB	no
DS113197	53035	53120	+	85	TVAG_238690	conserved hypothetical protein	VEuPathDB	no
DS113197	87717	87759	+	42	TVAG_238830	malic enzyme, putative	VEuPathDB	no
DS113197	108401	108422	-	21	TVAG_238910	amino acid transporter, putative	VEuPathDB	yes
DS113197	146789	147249	+	460	TVAG_TEG_DS113197_1_1	mariner transposase	VEuPathDB	no
DS113197	180205	180254	-	49	TVAG_239180	conserved hypothetical protein	VEuPathDB	no
DS113197	216802	216928	-	126	TVAG_239310	bollus pemphigoid antigen, putative	VEuPathDB	yes
DS113197	221483	221535	-	52	TVAG_239320	histone H4, putative	VEuPathDB	no
DS113197	222453	222530	+	77	TVAG_239330	centromere protein A, putative	VEuPathDB	yes
DS113197	239315	239319	-	4	TVAG_239380	hypothetical protein	VEuPathDB	no
DS113197	244440	244466	-	26	TVAG_239420	hypothetical protein	VEuPathDB	no
DS113197	260369	260398	+	29	TVAG_239500	40S ribosomal protein S4, putative	VEuPathDB	no
DS113197	268941	268958	-	17	TVAG_239540	hypothetical protein	VEuPathDB	no
DS113197	272222	272243	-	21	TVAG_239550	hypothetical protein	VEuPathDB	no
DS113197	276937	276990	-	53	TVAG_239580	translation factor, putative	VEuPathDB	no
DS113197	288058	288518	-	460	TVAG_TEG_DS113197_2_1	mariner transposase	VEuPathDB	no
DS113198	17783	17837	+	54	TVAG_109890	hypothetical protein	VEuPathDB	no
DS113198	43059	43097	+	38	TVAG_110000	actin-binding protein ipp, putative	VEuPathDB	no
DS113198	44796	44815	+	19	TVAG_110010	conserved hypothetical protein	VEuPathDB	no
DS113198	71697	71740	+	43	TVAG_110140	ubiquitin, putative	VEuPathDB	yes
DS113198	111631	111758	-	127	TVAG_110300	conserved hypothetical protein	VEuPathDB	no
DS113198	130790	130819	-	29	TVAG_110350	conserved hypothetical protein	VEuPathDB	no
DS113198	137971	138071	+	100	TVAG_110380	conserved hypothetical protein	VEuPathDB	yes
DS113198	169016	169444	+	428	TVAG_110510	hypothetical protein	VEuPathDB	no
DS113198	169843	169906	+	63	TVAG_110520	40S ribosomal protein S27, putative	VEuPathDB	yes
DS113198	170384	170646	-	262	TVAG_110530	40S ribosomal protein S20, putative	VEuPathDB	yes
DS113198	171470	171516	-	46	TVAG_110540	ubiquitin, putative	VEuPathDB	no
DS113198	191160	191296	+	136	TVAG_110580	centaurin gamma, putative	VEuPathDB	no
DS113198	240000	240083	-	83	TVAG_110760	hypothetical protein	VEuPathDB	no
DS113198	246867	246914	-	47	TVAG_110780	Clan CA, family C19, ubiquitin hydrolase-like cysteine peptidase	VEuPathDB	no
DS113198	277755	277814	-	59	TVAG_110890	60S ribosomal protein L13a, putative	VEuPathDB	yes
DS113199	10996	11205	-	209	TVAG_192330	leucine-rich repeat protein, BspA family	VEuPathDB	no
DS113199	19456	19483	-	27	TVAG_192370	conserved hypothetical protein	VEuPathDB	yes
DS113199	21680	21808	-	128	TVAG_192390	hypothetical protein	VEuPathDB	no
DS113199	35116	35162	-	46	TVAG_192440	RAC, putative	VEuPathDB	no
DS113199	42616	42731	+	115	TVAG_192480	60S ribosomal protein L35a, putative	VEuPathDB	yes
DS113199	54109	54184	-	75	TVAG_192560	hypothetical protein	VEuPathDB	no
DS113199	56490	56505	+	15	TVAG_192570	structure-specific recognition protein, putative	VEuPathDB	no
DS113199	59583	59613	+	30	TVAG_192590	conserved hypothetical protein	VEuPathDB	no
DS113199	60290	60298	-	8	TVAG_192610	conserved hypothetical protein	VEuPathDB	no
DS113199	62620	62677	-	57	TVAG_192620	actin depolymerizing factor, putative	VEuPathDB	yes
DS113199	126400	126971	-	571	TVAG_TEG_DS113199_1_1	mariner transposase	VEuPathDB	no
DS113199	132845	132862	-	17	TVAG_192910	60S ribosomal protein L30, putative	VEuPathDB	no
DS113199	133450	133717	-	267	TVAG_192920	hypothetical protein	VEuPathDB	no
DS113199	147456	147534	+	78	TVAG_192980	RNA polymerase II mediator complex subunit, putative	VEuPathDB	no
DS113199	161532	161630	-	98	TVAG_193040	conserved hypothetical protein	VEuPathDB	no
DS113199	163190	163366	-	176	TVAG_193050	TKL family protein kinase	VEuPathDB	no
DS113199	166889	166931	-	42	TVAG_193070	regulatory particle non-ATPase, putative	VEuPathDB	no
DS113199	201986	201987	-	1	TVAG_193180	conserved hypothetical protein	VEuPathDB	no
DS113199	226935	227038	-	103	TVAG_193270	conserved hypothetical protein	VEuPathDB	no
DS113199	248199	248470	-	271	TVAG_193400	UV excision repair protein rad23, putative	VEuPathDB	yes
DS113199	255204	255247	+	43	TVAG_193430	hypothetical protein	VEuPathDB	no
DS113199	258571	258604	-	33	TVAG_193450	hypothetical protein	VEuPathDB	no
DS113199	262812	263319	-	507	TVAG_193480	paramyosin, putative	VEuPathDB	no
DS113199	266507	266539	-	32	TVAG_193490	hypothetical protein	VEuPathDB	no
DS113200	685	713	-	28	TVAG_020850	conserved hypothetical protein	VEuPathDB	no
DS113200	3604	4057	-	453	TVAG_020860	conserved hypothetical protein	VEuPathDB	no
DS113200	68198	69137	+	939	TVAG_TEG_DS113200_1_1	mariner transposase	VEuPathDB	no
DS113200	93707	93752	+	45	TVAG_021190	conserved hypothetical protein	VEuPathDB	no
DS113200	100949	101160	+	211	TVAG_021230	N-myristoyl transferase, putative	VEuPathDB	yes
DS113200	102196	102326	-	130	TVAG_021240	conserved hypothetical protein	VEuPathDB	yes
DS113200	146379	146453	+	74	TVAG_021420	coronin, putative	VEuPathDB	no
DS113200	148544	148603	-	59	TVAG_021440	histone H2a, putative	VEuPathDB	yes
DS113200	156690	157630	-	940	TVAG_TEG_DS113200_3_1	mariner transposase	VEuPathDB	no
DS113200	197135	197435	-	300	TVAG_021720	polyadenylate-binding protein, putative	VEuPathDB	yes
DS113200	244652	244730	+	78	TVAG_021890	vacuolar ATP synthase subunit E, putative	VEuPathDB	yes
DS113201	93	1542	+	1449	TVAG_RG_DS113201_6	hypothetical protein	VEuPathDB	no
DS113201	52213	52248	-	35	TVAG_365520	glucosamine-6-phosphate isomerase, putative	VEuPathDB	no
DS113201	70176	70193	-	17	TVAG_365600	beta-galactosidase, putative	VEuPathDB	no
DS113201	77244	77277	+	33	TVAG_365610	leucine-rich repeat protein, BspA family	VEuPathDB	no
DS113201	80576	80591	+	15	TVAG_365620	ankyrin, putative	VEuPathDB	no
DS113201	82088	82172	-	84	TVAG_365630	hypothetical protein	VEuPathDB	no
DS113201	139799	139861	-	62	TVAG_365870	conserved hypothetical protein	VEuPathDB	no
DS113201	145804	145853	-	49	TVAG_365900	myosin heavy chain, clone, putative	VEuPathDB	no
DS113201	158796	158803	+	7	TVAG_365960	hypothetical protein	VEuPathDB	no
DS113201	204133	204185	+	52	TVAG_366170	conserved hypothetical protein	VEuPathDB	no
DS113201	218923	218967	+	44	TVAG_366230	ankyrin 2,3/unc44, putative	VEuPathDB	no
DS113201	235083	235115	-	32	TVAG_366320	pyrazinamidase/nicotinamidase, putative	VEuPathDB	no
DS113201	243816	243899	+	83	TVAG_366350	hypothetical protein	VEuPathDB	no
DS113201	245400	245443	-	43	TVAG_366360	conserved hypothetical protein	VEuPathDB	no
DS113201	250317	250370	+	53	TVAG_366370	centaurin/arf, putative	VEuPathDB	no
DS113201	250704	250739	-	35	TVAG_366380	glyceraldehyde 3-phosphate dehydrogenase, putative	VEuPathDB	no
DS113201	252840	252877	-	37	TVAG_366390	Integral membrane protein GPR178, putative	VEuPathDB	no
DS113201	256471	256492	+	21	TVAG_366400	hypothetical protein	VEuPathDB	no
DS113202	11713	11714	+	1	TVAG_401850	NAD dependent epimerase/dehydratase, putative	VEuPathDB	yes
DS113202	26014	26103	-	89	TVAG_401890	60S ribosomal protein L27a, putative	VEuPathDB	yes
DS113202	26980	27061	-	81	TVAG_401900	30S ribosomal protein S17p, putative	VEuPathDB	yes
DS113202	48820	48835	+	15	TVAG_401990	DNA-binding protein eta2, putative	VEuPathDB	no
DS113202	50334	50388	+	54	TVAG_402000	hypothetical protein	VEuPathDB	no
DS113202	75612	75642	-	30	TVAG_402090	TKL family protein kinase	VEuPathDB	no
DS113202	109957	110216	+	259	TVAG_402220	conserved hypothetical protein	VEuPathDB	no
DS113202	113752	113922	+	170	TVAG_402250	hypothetical protein	VEuPathDB	no
DS113202	114006	114029	-	23	TVAG_402260	coactosin, putative	VEuPathDB	no
DS113202	136780	136835	+	55	TVAG_402360	conserved hypothetical protein	VEuPathDB	no
DS113202	147438	147509	+	71	TVAG_402420	conserved hypothetical protein	VEuPathDB	no
DS113202	164556	164614	+	58	TVAG_402500	60S acidic ribosomal protein P2, putative	VEuPathDB	no
DS113202	164968	165080	-	112	TVAG_402510	60S acidic ribosomal protein P1, putative	VEuPathDB	yes
DS113202	174483	174502	-	19	TVAG_402540	hypothetical protein	VEuPathDB	no
DS113202	183095	183130	+	35	TVAG_402580	ribonucleoside-diphosphate reductase alpha chain, putative	VEuPathDB	no
DS113202	208615	208703	+	88	TVAG_402660	conserved hypothetical protein	VEuPathDB	no
DS113202	239037	239977	-	940	TVAG_TEG_DS113202_3_1	mariner transposase	VEuPathDB	no
DS113203	5279	5629	-	350	TVAG_129430	CMGC family protein kinase	VEuPathDB	no
DS113203	23247	23286	-	39	TVAG_129510	hypothetical protein	VEuPathDB	no
DS113203	24765	24833	-	68	TVAG_129520	RING finger protein, putative	VEuPathDB	no
DS113203	27421	27473	-	52	TVAG_129530	hypothetical protein	VEuPathDB	no
DS113203	32851	33390	+	539	TVAG_129550	hypothetical protein	VEuPathDB	no
DS113203	44341	44342	-	1	TVAG_129590	hypothetical protein	VEuPathDB	yes
DS113203	49727	49756	+	29	TVAG_129610	conserved hypothetical protein	VEuPathDB	no
DS113203	60609	61547	-	938	TVAG_TEG_DS113203_1_1	mariner transposase	VEuPathDB	no
DS113203	70406	70430	-	24	TVAG_129720	histone H4, putative	VEuPathDB	no
DS113203	71288	71295	+	7	TVAG_129730	histone H3, putative	VEuPathDB	no
DS113203	117666	117768	-	102	TVAG_129860	conserved hypothetical protein	VEuPathDB	no
DS113203	122236	122318	-	82	TVAG_129870	ankyrin repeat-containing protein, putative	VEuPathDB	no
DS113203	128436	128859	+	423	TVAG_129900	phosphatidate phosphatase, putative	VEuPathDB	yes
DS113203	182938	183160	-	222	TVAG_130120	ankyrin repeat-containing protein, putative	VEuPathDB	no
DS113203	194304	194358	-	54	TVAG_130180	conserved hypothetical protein	VEuPathDB	no
DS113203	225536	225908	+	372	TVAG_130280	heat shock protein 70kD, putative	VEuPathDB	no
DS113203	226394	226605	+	211	TVAG_130290	hypothetical protein	VEuPathDB	no
DS113203	228360	228386	-	26	TVAG_130310	hypothetical protein	VEuPathDB	no
DS113203	235234	235866	-	632	TVAG_TEG_DS113203_6_1	mariner transposase	VEuPathDB	no
DS113203	241314	241356	-	42	TVAG_130360	hypothetical protein	VEuPathDB	no
DS113204	18058	18097	-	39	TVAG_177910	hypothetical protein	VEuPathDB	no
DS113204	19993	20042	+	49	TVAG_177920	ribosomal protein S9, putative	VEuPathDB	no
DS113204	25742	25761	+	19	TVAG_177940	protein phosphatase type 2C, putative	VEuPathDB	no
DS113204	28673	28717	-	44	TVAG_177950	conserved hypothetical protein	VEuPathDB	no
DS113204	34457	34511	+	54	TVAG_177960	conserved hypothetical protein	VEuPathDB	no
DS113204	42486	42500	+	14	TVAG_177970	hypothetical protein	VEuPathDB	no
DS113204	42986	43925	+	939	TVAG_TEG_DS113204_2_1	mariner transposase	VEuPathDB	no
DS113204	46964	47903	-	939	TVAG_TEG_DS113204_3_1	mariner transposase	VEuPathDB	no
DS113204	52108	52198	+	90	TVAG_178000	60S ribosomal protein L23a, putative	VEuPathDB	yes
DS113204	82360	83020	+	660	TVAG_TEG_DS113204_4_1	mariner transposase	VEuPathDB	no
DS113204	120961	120976	-	15	TVAG_178250	glycerophosphoryl diester phosphodiesterase, putative	VEuPathDB	no
DS113204	136839	136878	-	39	TVAG_178290	NAD dependent epimerase/dehydratase, putative	VEuPathDB	no
DS113204	141351	142291	+	940	TVAG_TEG_DS113204_7_1	mariner transposase	VEuPathDB	no
DS113204	159974	159984	+	10	TVAG_178370	hypothetical protein	VEuPathDB	yes
DS113204	207683	207707	-	24	TVAG_178580	alpha-amylase, putative	VEuPathDB	no
DS113204	212285	212305	-	20	TVAG_178600	40S ribosomal protein S20, putative	VEuPathDB	no
DS113204	218805	218858	-	53	TVAG_178610	conserved hypothetical protein	VEuPathDB	no
DS113204	226067	226706	-	639	TVAG_TEG_DS113204_8_1	mariner transposase	VEuPathDB	no
DS113204	230660	230703	+	43	TVAG_178630	hypothetical protein	VEuPathDB	no
DS113204	231643	231657	-	14	TVAG_178650	conserved hypothetical protein	VEuPathDB	no
DS113204	240891	240941	-	50	TVAG_178710	30S ribosomal protein S3, putative	VEuPathDB	no
DS113204	253710	253716	+	6	TVAG_178760	histone deacetylase, putative	VEuPathDB	no
DS113205	12565	12582	-	17	TVAG_432450	60S ribosomal protein L37, putative	VEuPathDB	no
DS113205	19927	19947	-	20	TVAG_432490	activating signal cointegrator 1 complex subunit 3, helc1, putative	VEuPathDB	no
DS113205	24227	24257	+	30	TVAG_432500	conserved hypothetical protein	VEuPathDB	no
DS113205	41970	42036	+	66	TVAG_432570	snare protein ykt6, putative	VEuPathDB	no
DS113205	45855	45945	-	90	TVAG_432600	conserved hypothetical protein	VEuPathDB	no
DS113205	53903	53920	+	17	TVAG_432620	hypothetical protein	VEuPathDB	no
DS113205	58400	58427	+	27	TVAG_432640	gamma-soluble NSF attachment protein, putative	VEuPathDB	no
DS113205	58467	58544	-	77	TVAG_432650	nitrogen fixation protein nifu, putative	VEuPathDB	yes
DS113205	102133	102165	-	32	TVAG_432780	conserved hypothetical protein	VEuPathDB	yes
DS113205	103276	103587	-	311	TVAG_432790	ankyrin repeat-containing protein, putative	VEuPathDB	no
DS113205	160167	160169	+	2	TVAG_432930	hypothetical protein	VEuPathDB	no
DS113205	177162	177181	+	19	TVAG_432980	histidinol-phosphate aminotransferase, putative	VEuPathDB	yes
DS113205	177406	177565	-	159	TVAG_432990	conserved hypothetical protein	VEuPathDB	no
DS113205	185238	185320	+	82	TVAG_433030	hypothetical protein	VEuPathDB	no
DS113205	206673	206738	+	65	TVAG_433110	antibiotic synthetase, putative	VEuPathDB	no
DS113205	211080	211173	+	93	TVAG_433130	heat shock protein, putative	VEuPathDB	no
DS113205	224085	224130	+	45	TVAG_433200	60S ribosomal protein L23a, putative	VEuPathDB	no
DS113205	231045	231053	-	8	TVAG_433240	conserved hypothetical protein	VEuPathDB	no
DS113205	234491	234509	-	18	TVAG_433250	60S ribosomal protein L36e, putative	VEuPathDB	no
DS113206	10198	10242	+	44	TVAG_228140	hypothetical protein	VEuPathDB	no
DS113206	15163	15233	-	70	TVAG_228160	coactosin, putative	VEuPathDB	yes
DS113206	49614	49677	-	63	TVAG_228280	MYB124, putative	VEuPathDB	no
DS113206	50535	51042	-	507	TVAG_228290	conserved hypothetical protein	VEuPathDB	no
DS113206	52973	53014	-	41	TVAG_228300	60S ribosomal protein L12, putative	VEuPathDB	yes
DS113206	75574	75612	-	38	TVAG_228410	14-3-3 protein sigma, gamma, zeta, beta/alpha, putative	VEuPathDB	no
DS113206	93539	93569	+	30	TVAG_228480	conserved hypothetical protein	VEuPathDB	no
DS113206	94125	94145	-	20	TVAG_228490	hypothetical protein	VEuPathDB	no
DS113206	111067	111171	+	104	TVAG_228520	malic enzyme, putative	VEuPathDB	no
DS113206	121416	121524	+	108	TVAG_228560	conserved hypothetical protein	VEuPathDB	no
DS113206	155007	155051	+	44	TVAG_228640	histone H2b, putative	VEuPathDB	no
DS113206	186700	186734	-	34	TVAG_228780	alcohol dehydrogenase, putative	VEuPathDB	no
DS113206	188566	188888	-	322	TVAG_228790	TKL family protein kinase	VEuPathDB	no
DS113206	192763	192767	+	4	TVAG_228800	conserved hypothetical protein	VEuPathDB	yes
DS113206	198858	198941	+	83	TVAG_228810	conserved hypothetical protein	VEuPathDB	no
DS113206	200705	200723	+	18	TVAG_228830	conserved hypothetical protein	VEuPathDB	no
DS113206	206240	206371	+	131	TVAG_228870	conserved hypothetical protein	VEuPathDB	no
DS113206	214387	214847	-	460	TVAG_TEG_DS113206_3_1	mariner transposase	VEuPathDB	no
DS113207	18214	18259	-	45	TVAG_135870	hypothetical protein	VEuPathDB	no
DS113207	36956	36966	+	10	TVAG_135940	hypothetical protein	VEuPathDB	no
DS113207	62063	62089	+	26	TVAG_136040	60S ribosomal protein L44, putative	VEuPathDB	no
DS113207	87364	87420	+	56	TVAG_136140	guanylate cyclase, putative	VEuPathDB	no
DS113207	90553	90599	+	46	TVAG_136150	conserved hypothetical protein	VEuPathDB	no
DS113207	102977	103014	+	37	TVAG_136190	n6-adenosine-methyltransferase ime4, putative	VEuPathDB	yes
DS113207	124960	125009	+	49	TVAG_136250	vacuolar ATP synthase proteolipid subunit, putative	VEuPathDB	yes
DS113207	135567	135580	-	13	TVAG_136320	sec61 gamma subunit, putative	VEuPathDB	yes
DS113207	136243	136322	-	79	TVAG_136330	sulfite reductase, putative	VEuPathDB	yes
DS113207	163108	163168	+	60	TVAG_136430	STE family protein kinase	VEuPathDB	no
DS113207	176168	176192	+	24	TVAG_136490	hypothetical protein	VEuPathDB	no
DS113207	186926	187045	+	119	TVAG_136510	conserved hypothetical protein	VEuPathDB	no
DS113207	208901	208927	-	26	TVAG_136640	phenylalanyl-tRNA synthetase alpha chain, putative	VEuPathDB	no
DS113207	212279	212290	-	11	TVAG_136660	nucleoside diphosphate kinase, putative	VEuPathDB	yes
DS113207	228611	228746	+	135	TVAG_136730	hypothetical protein	VEuPathDB	no
DS113208	11636	11803	+	167	TVAG_100830	histone H1, early embryonic, putative	VEuPathDB	yes
DS113208	35810	36023	-	213	TVAG_100910	hypothetical protein	VEuPathDB	yes
DS113208	62588	62656	-	68	TVAG_101000	bromodomain-containing protein, putative	VEuPathDB	no
DS113208	63814	63893	+	79	TVAG_101020	hypothetical protein	VEuPathDB	no
DS113208	72454	72607	+	153	TVAG_101030	protein MLP1, putative	VEuPathDB	yes
DS113208	76584	76737	-	153	TVAG_101070	hypothetical protein	VEuPathDB	no
DS113208	99601	99928	-	327	TVAG_101200	conserved hypothetical protein	VEuPathDB	no
DS113208	117628	117736	-	108	TVAG_101260	Rab32, putative	VEuPathDB	yes
DS113208	120068	120103	-	35	TVAG_101280	conserved hypothetical protein	VEuPathDB	no
DS113208	124090	124117	+	27	TVAG_101300	bromodomain-containing protein, putative	VEuPathDB	no
DS113208	128771	128850	+	79	TVAG_101330	hypothetical protein	VEuPathDB	yes
DS113208	129064	129077	-	13	TVAG_101340	conserved hypothetical protein	VEuPathDB	no
DS113208	136289	136373	-	84	TVAG_101370	BAS1, putative	VEuPathDB	no
DS113208	165344	165436	-	92	TVAG_101470	hypothetical protein	VEuPathDB	no
DS113208	169313	169501	-	188	TVAG_101500	hypothetical protein	VEuPathDB	no
DS113208	200742	200794	+	52	TVAG_101620	NAD dependent epimerase/dehydratase, putative	VEuPathDB	no
DS113208	222413	222456	-	43	TVAG_101690	60S ribosomal protein L24, putative	VEuPathDB	no
DS113209	12801	13084	+	283	TVAG_451850	conserved hypothetical protein	VEuPathDB	no
DS113209	13465	13861	+	396	TVAG_451860	conserved hypothetical protein	VEuPathDB	yes
DS113209	31730	31747	+	17	TVAG_451900	Clan CA, family C19, ubiquitin hydrolase-like cysteine peptidase	VEuPathDB	no
DS113209	34300	34336	+	36	TVAG_451910	conserved hypothetical protein	VEuPathDB	no
DS113209	45253	45291	-	38	TVAG_451940	hypothetical protein	VEuPathDB	no
DS113209	70612	70644	-	32	TVAG_452020	conserved hypothetical protein	VEuPathDB	no
DS113209	91779	91841	+	62	TVAG_452070	kchip4.2, putative	VEuPathDB	no
DS113209	99867	99985	-	118	TVAG_452110	conserved hypothetical protein	VEuPathDB	no
DS113209	107847	107874	+	27	TVAG_452120	GTP-binding protein alpha subunit, gna, putative	VEuPathDB	no
DS113209	114068	114095	+	27	TVAG_452160	conserved hypothetical protein	VEuPathDB	no
DS113209	114832	114891	+	59	TVAG_452170	Rab9, putative	VEuPathDB	no
DS113209	141730	142140	-	410	TVAG_452330	conserved hypothetical protein	VEuPathDB	no
DS113209	194493	194553	-	60	TVAG_452580	protein phosphatase-5, putative	VEuPathDB	no
DS113209	229845	229880	-	35	TVAG_452720	histone H4, putative	VEuPathDB	yes
DS113209	230785	230788	+	3	TVAG_452730	cenpa protein, putative	VEuPathDB	no
DS113209	237223	237447	-	224	TVAG_452780	ubiquitin, putative	VEuPathDB	yes
DS113210	14538	14609	-	71	TVAG_214010	Placental protein, putative	VEuPathDB	no
DS113210	19537	19545	-	8	TVAG_RG_DS113210_36	conserved hypothetical protein	VEuPathDB	no
DS113210	23257	23285	+	28	TVAG_214040	hypothetical protein	VEuPathDB	no
DS113210	85932	86392	-	460	TVAG_TEG_DS113210_3_1	mariner transposase	VEuPathDB	no
DS113210	127344	128046	+	702	TVAG_TEG_DS113210_7_1	mariner transposase	VEuPathDB	no
DS113210	131163	131190	+	27	TVAG_214600	hypothetical protein	VEuPathDB	no
DS113210	208128	208146	-	18	TVAG_214830	uridine cytidine kinase I, putative	VEuPathDB	no
DS113211	8624	8632	+	8	TVAG_189660	conserved hypothetical protein	VEuPathDB	no
DS113211	10415	10440	+	25	TVAG_189680	hypothetical protein	VEuPathDB	no
DS113211	10541	10565	-	24	TVAG_189690	conserved hypothetical protein	VEuPathDB	no
DS113211	22271	22317	-	46	TVAG_189760	conserved hypothetical protein	VEuPathDB	no
DS113211	31319	31369	+	50	TVAG_189790	conserved hypothetical protein	VEuPathDB	no
DS113211	38500	38511	+	11	TVAG_189850	hypothetical protein	VEuPathDB	no
DS113211	38716	38736	-	20	TVAG_189860	actin, putative	VEuPathDB	no
DS113211	95935	95957	-	22	TVAG_190130	60S ribosomal protein L22, putative	VEuPathDB	no
DS113211	123730	124078	+	348	TVAG_190220	coiled-coil domain-containing protein, putative	VEuPathDB	no
DS113211	124415	124519	-	104	TVAG_190230	60S ribosomal protein L26, putative	VEuPathDB	no
DS113211	133934	134107	+	173	TVAG_190260	conserved hypothetical protein	VEuPathDB	yes
DS113211	136565	136587	+	22	TVAG_190280	60S ribosomal protein L13, putative	VEuPathDB	no
DS113211	136701	136888	-	187	TVAG_190290	60S ribosomal protein L24, putative	VEuPathDB	yes
DS113211	167225	167280	-	55	TVAG_190440	conserved hypothetical protein	VEuPathDB	no
DS113211	173047	173261	+	214	TVAG_190450	kakapo, putative	VEuPathDB	yes
DS113211	184417	184512	-	95	TVAG_190490	conserved hypothetical protein	VEuPathDB	yes
DS113211	190527	190572	+	45	TVAG_190510	GTP-binding protein rit, putative	VEuPathDB	no
DS113211	191956	191983	-	27	TVAG_190520	protein farnesyltransferase alpha subunit/RAB geranylgeranyl transferase alpha subunit, putative	VEuPathDB	no
DS113211	225776	226007	+	231	TVAG_190640	conserved hypothetical protein	VEuPathDB	no
DS113212	13246	13308	+	62	TVAG_246600	ribosomal protein L39e, putative	VEuPathDB	no
DS113212	25590	25668	+	78	TVAG_246640	esophageal cancer associated protein, putative	VEuPathDB	no
DS113212	31140	31185	-	45	TVAG_246670	trafficking protein particle complex subunit, putative	VEuPathDB	no
DS113212	41583	41607	+	24	TVAG_246730	60S ribosomal protein L38, putative	VEuPathDB	no
DS113212	44927	44967	+	40	TVAG_246760	ganglioside induced differentiation associated protein, putative	VEuPathDB	no
DS113212	69320	69446	+	126	TVAG_246920	hypothetical protein	VEuPathDB	yes
DS113212	105945	105978	+	33	TVAG_247060	40S ribosomal protein S17, putative	VEuPathDB	no
DS113212	128142	128298	-	156	TVAG_247120	TKL family protein kinase	VEuPathDB	no
DS113212	134943	135112	-	169	TVAG_247160	hypothetical protein	VEuPathDB	no
DS113212	139568	139594	-	26	TVAG_247200	adenylate kinase, putative	VEuPathDB	no
DS113212	187516	187548	+	32	TVAG_247360	TGF-beta-inducible nuclear protein, putative	VEuPathDB	no
DS113212	188034	188047	-	13	TVAG_247370	conserved hypothetical protein	VEuPathDB	yes
DS113212	200419	200471	-	52	TVAG_247430	DNA-directed RNA polymerase I largest subunit, putative	VEuPathDB	no
DS113212	217821	217843	+	22	TVAG_247480	UDP- glucose pyrophosphorylase, putative	VEuPathDB	no
DS113212	219503	219524	-	21	TVAG_247500	Charged multivesicular body protein 1B, putative	VEuPathDB	no
DS113213	68422	68520	-	98	TVAG_146630	conserved hypothetical protein	VEuPathDB	no
DS113213	96443	96774	-	331	TVAG_146700	hypothetical protein	VEuPathDB	no
DS113213	101451	101797	+	346	TVAG_146720	conserved hypothetical protein	VEuPathDB	no
DS113213	125297	125362	-	65	TVAG_146780	conserved hypothetical protein	VEuPathDB	no
DS113213	126024	126480	-	456	TVAG_146790	glycine-rich cell wall structural protein 1 precursor, putative	VEuPathDB	no
DS113213	163149	163198	-	49	TVAG_146910	glyceraldehyde 3-phosphate dehydrogenase, putative	VEuPathDB	no
DS113213	170220	170259	-	39	TVAG_146960	cyclophilin, putative	VEuPathDB	no
DS113213	174203	174213	-	10	TVAG_146970	ubx domain-containing protein, putative	VEuPathDB	no
DS113213	182287	182309	-	22	TVAG_147010	Derlin-2, putative	VEuPathDB	no
DS113213	188393	188414	-	21	TVAG_147050	conserved hypothetical protein	VEuPathDB	no
DS113213	191892	191913	-	21	TVAG_147070	chaperonin containing t-complex protein 1, delta subunit, tcpd, putative	VEuPathDB	no
DS113213	199829	199886	-	57	TVAG_147120	voltage and ligand gated potassium channel, putative	VEuPathDB	no
DS113214	41554	41651	+	97	TVAG_294840	hypothetical protein	VEuPathDB	yes
DS113214	66545	66584	-	39	TVAG_294940	conserved hypothetical protein	VEuPathDB	no
DS113214	68068	68152	-	84	TVAG_294950	C-MYB, putative	VEuPathDB	no
DS113214	86052	86099	-	47	TVAG_295020	AGC family protein kinase	VEuPathDB	no
DS113214	87820	87981	-	161	TVAG_295030	rabb and C, putative	VEuPathDB	no
DS113214	137907	137970	+	63	TVAG_295150	hypothetical protein	VEuPathDB	no
DS113214	141346	141441	+	95	TVAG_295160	chromosome region maintenance protein, putative	VEuPathDB	no
DS113214	147195	147655	+	460	TVAG_TEG_DS113214_2_1	mariner transposase	VEuPathDB	no
DS113214	153042	153981	+	939	TVAG_TEG_DS113214_3_1	mariner transposase	VEuPathDB	no
DS113215	5136	5168	-	32	TVAG_267550	conserved hypothetical protein	VEuPathDB	no
DS113215	51483	51640	-	157	TVAG_267760	conserved hypothetical protein	VEuPathDB	yes
DS113215	76146	76199	+	53	TVAG_267830	AGC family protein kinase	VEuPathDB	no
DS113215	86783	86815	+	32	TVAG_267870	malic enzyme, putative	VEuPathDB	no
DS113215	99511	99524	-	13	TVAG_267950	lysyl-tRNA synthetase, putative	VEuPathDB	yes
DS113215	108560	108606	-	46	TVAG_268000	hypothetical protein	VEuPathDB	no
DS113215	110219	110303	-	84	TVAG_268020	aspartate aminotransferase, putative	VEuPathDB	yes
DS113215	121447	121476	-	29	TVAG_268050	phosphoglycerate kinase, putative	VEuPathDB	no
DS113215	153999	154002	+	3	TVAG_268160	ankyrin repeat and FYVE domain containing protein, putative	VEuPathDB	yes
DS113215	175383	175448	+	65	TVAG_268240	hypothetical protein	VEuPathDB	no
DS113215	204522	204542	-	20	TVAG_268390	conserved hypothetical protein	VEuPathDB	no
DS113215	205951	206013	-	62	TVAG_268400	hypothetical protein	VEuPathDB	no
DS113216	1957	1975	+	18	TVAG_062350	conserved hypothetical protein	VEuPathDB	no
DS113216	4360	4369	+	9	TVAG_062360	dynamin, putative	VEuPathDB	yes
DS113216	46113	46146	-	33	TVAG_062510	Clusterin-associated protein, putative	VEuPathDB	no
DS113216	47709	47772	-	63	TVAG_062520	cyclophilin, putative	VEuPathDB	yes
DS113216	63500	63505	-	5	TVAG_062600	conserved hypothetical protein	VEuPathDB	no
DS113216	69872	69878	-	6	TVAG_062620	hypothetical protein	VEuPathDB	no
DS113216	79195	79214	-	19	TVAG_062640	eukaryotic translation initiation factor 3 subunit, putative	VEuPathDB	yes
DS113216	85720	86081	-	361	TVAG_062680	conserved hypothetical protein	VEuPathDB	no
DS113216	97898	97943	-	45	TVAG_062750	conserved hypothetical protein	VEuPathDB	no
DS113216	102012	102025	+	13	TVAG_062760	amino acid transporter, putative	VEuPathDB	no
DS113216	117115	117939	-	824	TVAG_TEG_DS113216_3_1	mariner transposase	VEuPathDB	no
DS113216	121029	121073	-	44	TVAG_062860	Clan CA, family C19, ubiquitin hydrolase-like cysteine peptidase	VEuPathDB	no
DS113216	125985	126031	-	46	TVAG_062880	tubulin, putative	VEuPathDB	yes
DS113216	138808	138833	-	25	TVAG_062930	conserved hypothetical protein	VEuPathDB	no
DS113216	146759	146821	-	62	TVAG_062950	conserved hypothetical protein	VEuPathDB	no
DS113216	193694	193721	-	27	TVAG_063180	conserved hypothetical protein	VEuPathDB	no
DS113216	202808	202902	+	94	TVAG_063200	conserved hypothetical protein	VEuPathDB	no
DS113216	203755	203914	+	159	TVAG_063210	cytochrome B5 isoform 1, putative	VEuPathDB	yes
DS113217	12390	12483	-	93	TVAG_462300	conserved hypothetical protein	VEuPathDB	no
DS113217	14523	14585	+	62	TVAG_462310	conserved hypothetical protein	VEuPathDB	no
DS113217	27192	27227	+	35	TVAG_462360	2-hydroxyacid dehydrogenase, putative	VEuPathDB	no
DS113217	27998	28053	+	55	TVAG_462370	Rabx19 protein, putative	VEuPathDB	no
DS113217	39575	39711	-	136	TVAG_462430	ras-dva small GTPase, putative	VEuPathDB	no
DS113217	42331	42562	-	231	TVAG_462440	conserved hypothetical protein	VEuPathDB	yes
DS113217	55202	55291	-	89	TVAG_462480	rho4, putative	VEuPathDB	yes
DS113217	61629	61666	+	37	TVAG_462520	hypothetical protein	VEuPathDB	no
DS113217	62026	62093	-	67	TVAG_462530	30S ribosomal protein S8, putative	VEuPathDB	no
DS113217	83768	83845	+	77	TVAG_462650	leucine-rich repeat protein, BspA family	VEuPathDB	no
DS113217	83850	84006	-	156	TVAG_462660	histone H2a, putative	VEuPathDB	yes
DS113217	88818	88854	+	36	TVAG_462680	Clan SC, family S28, unassigned serine peptidase	VEuPathDB	yes
DS113217	89948	89990	+	42	TVAG_462690	30S ribosomal protein S3, putative	VEuPathDB	no
DS113217	104302	104340	+	38	TVAG_462770	hypothetical protein	VEuPathDB	no
DS113217	109805	109829	-	24	TVAG_462810	40S ribosomal protein S6, putative	VEuPathDB	no
DS113217	112799	112990	-	191	TVAG_TEG_DS113217_2_1	mariner transposase	VEuPathDB	no
DS113217	121956	122749	+	793	TVAG_TEG_DS113217_3_1	mariner transposase	VEuPathDB	no
DS113217	124981	125774	-	793	TVAG_TEG_DS113217_4_1	mariner transposase	VEuPathDB	no
DS113217	155670	155819	-	149	TVAG_462920	phosphofructokinase, putative	VEuPathDB	yes
DS113217	161218	161244	-	26	TVAG_462940	14-3-3 protein sigma, gamma, zeta, beta/alpha, putative	VEuPathDB	no
DS113217	162787	162873	-	86	TVAG_462950	vacuolar ATP synthase proteolipid subunit 1, 2, 3, putative	VEuPathDB	yes
DS113217	203877	203890	-	13	TVAG_463090	conserved hypothetical protein	VEuPathDB	no
DS113217	218846	219417	+	571	TVAG_TEG_DS113217_5_1	mariner transposase	VEuPathDB	no
DS113218	10412	10423	+	11	TVAG_082990	hypothetical protein	VEuPathDB	no
DS113218	14309	14371	+	62	TVAG_083020	formin 2,3 and collagen domain-containing protein, putative	VEuPathDB	no
DS113218	16601	16649	-	48	TVAG_083040	conserved hypothetical protein	VEuPathDB	no
DS113218	63114	63192	-	78	TVAG_083260	60S ribosomal protein L17, putative	VEuPathDB	yes
DS113218	70553	70593	+	40	TVAG_083290	arp2/3 complex 21 kD subunit, putative	VEuPathDB	no
DS113218	91976	92171	+	195	TVAG_083360	conserved hypothetical protein	VEuPathDB	no
DS113218	92675	92690	-	15	TVAG_083370	conserved hypothetical protein	VEuPathDB	no
DS113218	105271	105389	+	118	TVAG_083440	conserved hypothetical protein	VEuPathDB	no
DS113218	122569	122652	+	83	TVAG_083500	cGMP-specific 3,5-cyclic phosphodiesterase, putative	VEuPathDB	no
DS113218	136831	136858	-	27	TVAG_083560	conserved hypothetical protein	VEuPathDB	no
DS113218	147981	148359	-	378	TVAG_083620	conserved hypothetical protein	VEuPathDB	no
DS113218	163138	163238	-	100	TVAG_083700	60S ribosomal protein L37a, putative	VEuPathDB	yes
DS113218	164240	164260	-	20	TVAG_083710	ubiquitin-protein ligase, putative	VEuPathDB	no
DS113218	167637	167727	+	90	TVAG_083720	eukaryotic translation initiation factor 4g, putative	VEuPathDB	yes
DS113218	174565	174630	-	65	TVAG_083740	conserved hypothetical protein	VEuPathDB	no
DS113218	175886	175937	+	51	TVAG_083760	hypothetical protein	VEuPathDB	no
DS113218	218937	219408	-	471	TVAG_TEG_DS113218_3_1	mariner transposase	VEuPathDB	no
DS113219	32727	32836	-	109	TVAG_045580	conserved hypothetical protein	VEuPathDB	no
DS113219	38835	38863	-	28	TVAG_045630	hypothetical protein	VEuPathDB	no
DS113219	41515	41637	-	122	TVAG_045640	conserved hypothetical protein	VEuPathDB	no
DS113219	42117	42216	-	99	TVAG_045650	conserved hypothetical protein	VEuPathDB	no
DS113219	46183	46205	-	22	TVAG_045670	conserved hypothetical protein	VEuPathDB	no
DS113219	48519	48802	+	283	TVAG_045680	hypothetical protein	VEuPathDB	no
DS113219	66325	66369	-	44	TVAG_045750	hypothetical protein	VEuPathDB	no
DS113219	136838	136958	+	120	TVAG_TEG_DS113219_3_1	mariner transposase	VEuPathDB	no
DS113219	140988	141295	+	307	TVAG_046120	ankyrin repeat-containing protein, putative	VEuPathDB	no
DS113219	146415	146466	-	51	TVAG_046150	hypothetical protein	VEuPathDB	no
DS113219	166745	167365	-	620	TVAG_TEG_DS113219_6_1	mariner transposase	VEuPathDB	no
DS113219	197119	197356	+	237	TVAG_046420	heat shock protein, putative	VEuPathDB	no
DS113219	197372	197413	-	41	TVAG_046430	hypothetical protein	VEuPathDB	no
DS113219	205788	205845	-	57	TVAG_046460	hypothetical protein	VEuPathDB	no
DS113219	209311	209882	-	571	TVAG_TEG_DS113219_7_1	mariner transposase	VEuPathDB	no
DS113219	218596	218706	+	110	TVAG_046500	conserved hypothetical protein	VEuPathDB	no
DS113220	14186	14255	-	69	TVAG_253580	hypothetical protein	VEuPathDB	no
DS113220	17377	17478	+	101	TVAG_253600	hypothetical protein	VEuPathDB	no
DS113220	23280	23300	-	20	TVAG_253630	heat shock protein, putative	VEuPathDB	yes
DS113220	31446	31484	-	38	TVAG_253650	malate dehydrogenase, putative	VEuPathDB	no
DS113220	34728	34747	+	19	TVAG_253660	conserved hypothetical protein	VEuPathDB	no
DS113220	40431	40458	+	27	TVAG_253700	conserved hypothetical protein	VEuPathDB	no
DS113220	41909	42068	-	159	TVAG_253720	hypothetical protein	VEuPathDB	no
DS113220	46697	46770	+	73	TVAG_253740	conserved hypothetical protein	VEuPathDB	no
DS113220	54101	54188	+	87	TVAG_253790	Clan CD, family C14, metacaspase-like cysteine peptidase	VEuPathDB	no
DS113220	78759	78982	+	223	TVAG_253920	conserved hypothetical protein	VEuPathDB	yes
DS113220	173097	173174	+	77	TVAG_254350	calponin/transgelin, putative	VEuPathDB	yes
DS113220	191229	191323	+	94	TVAG_254470	conserved hypothetical protein	VEuPathDB	yes
DS113220	200587	200932	-	345	TVAG_254520	hypothetical protein	VEuPathDB	no
DS113221	5560	5628	-	68	TVAG_122240	Clan MA, family M8, leishmanolysin-like protein	VEuPathDB	yes
DS113221	13658	13750	-	92	TVAG_122270	RAB, putative	VEuPathDB	no
DS113221	17788	17802	+	14	TVAG_122290	conserved hypothetical protein	VEuPathDB	yes
DS113221	35296	35449	+	153	TVAG_122360	conserved hypothetical protein	VEuPathDB	yes
DS113221	53322	53379	+	57	TVAG_122450	calcineurin B, putative	VEuPathDB	no
DS113221	54885	54923	-	38	TVAG_122470	DNA replication licensing factor MCM4, putative	VEuPathDB	yes
DS113221	58742	58803	-	61	TVAG_122490	conserved hypothetical protein	VEuPathDB	no
DS113221	59915	59928	-	13	TVAG_122500	syntaxin, putative	VEuPathDB	yes
DS113221	64528	64543	-	15	TVAG_122530	conserved hypothetical protein	VEuPathDB	no
DS113221	103480	103498	+	18	TVAG_122640	conserved hypothetical protein	VEuPathDB	no
DS113221	128700	128727	-	27	TVAG_122750	conserved hypothetical protein	VEuPathDB	no
DS113221	132138	132180	+	42	TVAG_122760	conserved hypothetical protein	VEuPathDB	no
DS113221	159855	159922	+	67	TVAG_122850	hypothetical protein	VEuPathDB	no
DS113221	179308	179348	-	40	TVAG_122940	conserved hypothetical protein	VEuPathDB	no
DS113221	211155	211363	-	208	TVAG_123040	sphingomyelin synthetase, putative	VEuPathDB	no
DS113222	4613	4717	-	104	TVAG_305730	chaperone protein DNAj, putative	VEuPathDB	yes
DS113222	8352	8406	+	54	TVAG_305740	conserved hypothetical protein	VEuPathDB	no
DS113222	13286	13324	-	38	TVAG_305770	Antigen LPMC-61, putative	VEuPathDB	no
DS113222	48131	48131	+	0	TVAG_305900	hypothetical protein	VEuPathDB	no
DS113222	63975	64027	-	52	TVAG_306000	hyvh1 dual specificity phosphatase, putative	VEuPathDB	no
DS113222	80011	80123	+	112	TVAG_306060	60S ribosomal protein L31, putative	VEuPathDB	yes
DS113222	86255	86323	-	68	TVAG_306110	mct-1 protein, putative	VEuPathDB	no
DS113222	91335	91385	-	50	TVAG_306160	conserved hypothetical protein	VEuPathDB	no
DS113222	97108	97145	+	37	TVAG_306180	hypothetical protein	VEuPathDB	no
DS113222	97389	97431	-	42	TVAG_306190	ribosomal protein S2, eukaryotic and archaeal form, putative	VEuPathDB	yes
DS113222	121624	121696	+	72	TVAG_306300	hypothetical protein	VEuPathDB	no
DS113222	122580	122669	+	89	TVAG_306310	60S ribosomal protein L27e, putative	VEuPathDB	yes
DS113222	123178	123226	-	48	TVAG_306320	calcium binding protein, putative	VEuPathDB	no
DS113222	124238	124281	-	43	TVAG_306330	hypothetical protein	VEuPathDB	no
DS113222	124969	125015	-	46	TVAG_306340	hypothetical protein	VEuPathDB	no
DS113222	130415	130509	-	94	TVAG_306370	hypothetical protein	VEuPathDB	no
DS113222	133922	134173	-	251	TVAG_306380	hypothetical protein	VEuPathDB	no
DS113222	157812	157864	+	52	TVAG_306500	hypothetical protein	VEuPathDB	no
DS113222	165334	165345	+	11	TVAG_306550	acc synthase, putative	VEuPathDB	no
DS113222	167506	167532	+	26	TVAG_306560	CAMK family protein kinase	VEuPathDB	no
DS113222	175346	175381	-	35	TVAG_306610	conserved hypothetical protein	VEuPathDB	no
DS113222	193349	193395	-	46	TVAG_306690	TKL family protein kinase	VEuPathDB	no
DS113223	53263	53283	-	20	TVAG_113270	hypothetical protein	VEuPathDB	no
DS113223	56121	56191	-	70	TVAG_113290	protein phosphatase-1, putative	VEuPathDB	no
DS113223	62609	62706	-	97	TVAG_113320	hypothetical protein	VEuPathDB	no
DS113223	137179	137257	+	78	TVAG_113600	DNA-directed RNA polymerase II, putative	VEuPathDB	yes
DS113223	153573	153614	+	41	TVAG_113690	r2r3-MYB transcription factor, putative	VEuPathDB	no
DS113223	159032	159130	-	98	TVAG_113710	phosphoglycerate mutase, putative	VEuPathDB	yes
DS113223	162092	162117	-	25	TVAG_113720	ribosomal protein L5, putative	VEuPathDB	no
DS113223	194466	194504	+	38	TVAG_113870	Acetyl-CoA hydrolase, putative	VEuPathDB	no
DS113223	199756	200108	+	352	TVAG_113910	conserved hypothetical protein	VEuPathDB	no
DS113223	207267	207297	-	30	TVAG_113950	40S ribosomal protein S11, putative	VEuPathDB	no
DS113224	7991	8065	-	74	TVAG_225200	nuclear lim interactor-interacting factor, putative	VEuPathDB	no
DS113224	18126	18191	+	65	TVAG_225230	Longevity-assurance protein, putative	VEuPathDB	no
DS113224	44758	44783	+	25	TVAG_225330	CMGC family protein kinase	VEuPathDB	no
DS113224	58493	59341	-	848	TVAG_TEG_DS113224_2_1	mariner transposase	VEuPathDB	no
DS113224	98766	99077	-	311	TVAG_RG_DS113224_2	conserved hypothetical protein	VEuPathDB	no
DS113224	118436	118509	-	73	TVAG_225560	hypothetical protein	VEuPathDB	no
DS113224	150497	150515	+	18	TVAG_225690	14-3-3 protein sigma, gamma, zeta, beta/alpha, putative	VEuPathDB	no
DS113224	162596	162632	+	36	TVAG_225760	60S ribosomal protein L22, putative	VEuPathDB	no
DS113224	165308	165537	-	229	TVAG_225780	conserved hypothetical protein	VEuPathDB	no
DS113224	172841	173134	-	293	TVAG_225800	conserved hypothetical protein	VEuPathDB	no
DS113224	206687	206704	-	17	TVAG_225940	MYB37, putative	VEuPathDB	no
DS113225	9426	10000	+	574	TVAG_TEG_DS113225_2_1	mariner transposase	VEuPathDB	no
DS113225	37469	37470	-	1	TVAG_010520	lim domain, putative	VEuPathDB	yes
DS113225	43141	43167	+	26	TVAG_010560	30S 40S ribosomal protein, putative	VEuPathDB	no
DS113225	43539	43595	-	56	TVAG_010570	WD-repeat protein, putative	VEuPathDB	no
DS113225	55873	55918	-	45	TVAG_010640	leucine-rich repeat protein, BspA family	VEuPathDB	no
DS113225	85242	86182	-	940	TVAG_TEG_DS113225_4_1	mariner transposase	VEuPathDB	no
DS113225	120669	121609	-	940	TVAG_TEG_DS113225_5_1	mariner transposase	VEuPathDB	no
DS113225	147570	147687	-	117	TVAG_010950	conserved hypothetical protein	VEuPathDB	yes
DS113225	151929	151972	+	43	TVAG_010970	protein disulfide isomerase, putative	VEuPathDB	no
DS113225	154416	154466	-	50	TVAG_010990	conserved hypothetical protein	VEuPathDB	no
DS113225	203896	203912	-	16	TVAG_011190	conserved hypothetical protein	VEuPathDB	no
DS113226	4764	4796	-	32	TVAG_015780	60S ribosomal protein L12, putative	VEuPathDB	no
DS113226	7245	7270	-	25	TVAG_015800	60S ribosomal protein L23, putative	VEuPathDB	no
DS113226	8162	8170	-	8	TVAG_015810	conserved hypothetical protein	VEuPathDB	no
DS113226	23303	23369	-	66	TVAG_015850	conserved hypothetical protein	VEuPathDB	no
DS113226	26866	26894	-	28	TVAG_015870	N-acetyltransferase separation anxiety, putative	VEuPathDB	no
DS113226	48682	48721	+	39	TVAG_015930	conserved hypothetical protein	VEuPathDB	no
DS113226	53091	53121	+	30	TVAG_015950	pyruvate kinase, putative	VEuPathDB	no
DS113226	63874	64836	-	962	TVAG_TEG_DS113226_3_1	mariner transposase	VEuPathDB	no
DS113226	88874	88899	+	25	TVAG_016150	3-hydroxy-3-methylglutaryl-coenzyme A reductase, putative	VEuPathDB	no
DS113226	94010	94044	+	34	TVAG_016180	conserved hypothetical protein	VEuPathDB	no
DS113226	103858	103906	-	48	TVAG_016210	chromatin regulatory protein sir2, putative	VEuPathDB	no
DS113226	115830	115932	+	102	TVAG_016240	Early endosome antigen, putative	VEuPathDB	no
DS113226	132664	132697	+	33	TVAG_016300	protein kinase inhibitor, putative	VEuPathDB	no
DS113226	134030	134034	-	4	TVAG_016320	conserved hypothetical protein	VEuPathDB	no
DS113226	144304	144392	-	88	TVAG_016360	conserved hypothetical protein	VEuPathDB	no
DS113227	4146	4176	+	30	TVAG_169810	conserved hypothetical protein	VEuPathDB	no
DS113227	9440	9645	+	205	TVAG_169840	conserved hypothetical protein	VEuPathDB	no
DS113227	25524	25605	-	81	TVAG_169890	conserved hypothetical protein	VEuPathDB	no
DS113227	40595	40805	+	210	TVAG_169960	AGC family protein kinase	VEuPathDB	yes
DS113227	41219	41263	-	44	TVAG_169970	leucine-rich repeat protein, BspA family	VEuPathDB	no
DS113227	62709	62761	-	52	TVAG_170050	conserved hypothetical protein	VEuPathDB	no
DS113227	79719	79960	+	241	TVAG_170150	conserved hypothetical protein	VEuPathDB	yes
DS113227	92896	92912	-	16	TVAG_170210	conserved hypothetical protein	VEuPathDB	no
DS113227	130759	130771	-	12	TVAG_170330	conserved hypothetical protein	VEuPathDB	no
DS113227	139045	139095	-	50	TVAG_170340	conserved hypothetical protein	VEuPathDB	no
DS113227	170629	170832	+	203	TVAG_170470	pc-MYB2, putative	VEuPathDB	no
DS113228	55754	55779	-	25	TVAG_234990	conserved hypothetical protein	VEuPathDB	no
DS113228	63811	63847	+	36	TVAG_235010	leucine-rich repeat protein, BspA family	VEuPathDB	no
DS113228	81480	82330	-	850	TVAG_TEG_DS113228_1_1	mariner transposase	VEuPathDB	no
DS113228	90493	90561	+	68	TVAG_235060	PIKK family atypical protein kinase	VEuPathDB	no
DS113228	100546	100597	+	51	TVAG_235090	conserved hypothetical protein	VEuPathDB	no
DS113228	105193	105234	-	41	TVAG_235120	osm-6/ift52, putative	VEuPathDB	no
DS113228	187247	187344	+	97	TVAG_235400	conserved hypothetical protein	VEuPathDB	no
DS113228	187534	187542	-	8	TVAG_235410	breast cancer suppressor candidate 1,bcsc-1, putative	VEuPathDB	no
DS113228	196793	196794	-	1	TVAG_235460	conserved hypothetical protein	VEuPathDB	no
DS113229	10833	10867	+	34	TVAG_453470	40S ribosomal protein S17, putative	VEuPathDB	no
DS113229	11279	11333	-	54	TVAG_453480	conserved hypothetical protein	VEuPathDB	no
DS113229	19234	19567	+	333	TVAG_453510	leucine-rich repeat protein, BspA family	VEuPathDB	no
DS113229	41882	41916	+	34	TVAG_453590	conserved hypothetical protein	VEuPathDB	no
DS113229	55594	55641	-	47	TVAG_453640	secretory carrier membrane protein, putative	VEuPathDB	no
DS113229	70893	70915	+	22	TVAG_453700	calcium binding protein, putative	VEuPathDB	yes
DS113229	71269	71295	-	26	TVAG_453710	conserved hypothetical protein	VEuPathDB	no
DS113229	78116	78283	+	167	TVAG_453740	conserved hypothetical protein	VEuPathDB	no
DS113229	99746	99790	+	44	TVAG_453790	conserved hypothetical protein	VEuPathDB	no
DS113229	119932	119978	+	46	TVAG_453910	conserved hypothetical protein	VEuPathDB	no
DS113229	124320	124424	+	104	TVAG_453950	conserved hypothetical protein	VEuPathDB	no
DS113229	128516	128583	+	67	TVAG_453980	conserved hypothetical protein	VEuPathDB	no
DS113229	132479	132804	-	325	TVAG_453990	elongation factor 1-beta, putative	VEuPathDB	yes
DS113229	134806	134836	+	30	TVAG_454000	ribosomal protein L5, putative	VEuPathDB	no
DS113229	145944	146070	-	126	TVAG_454090	calcium binding protein, putative	VEuPathDB	no
DS113229	147778	147925	+	147	TVAG_454100	conserved hypothetical protein	VEuPathDB	no
DS113229	173853	173875	+	22	TVAG_454160	conserved hypothetical protein	VEuPathDB	no
DS113229	188815	188888	+	73	TVAG_454230	Rab15, 13, 10, 1, 35, 5, and, putative	VEuPathDB	no
DS113229	200491	200526	-	35	TVAG_454260	60S ribosomal protein L37, putative	VEuPathDB	no
DS113230	29363	29400	-	37	TVAG_493840	developmentally regulated protein tpo1, putative	VEuPathDB	yes
DS113230	67316	67320	-	4	TVAG_493960	WD-repeat protein, putative	VEuPathDB	no
DS113230	74231	74273	+	42	TVAG_493990	hect E3 ubiquitin ligase, putative	VEuPathDB	no
DS113230	91069	91100	-	31	TVAG_494060	ribosomal protein L30, putative	VEuPathDB	no
DS113230	96158	96412	+	254	TVAG_494090	conserved hypothetical protein	VEuPathDB	yes
DS113230	190225	190305	+	80	TVAG_494470	conserved hypothetical protein	VEuPathDB	no
DS113230	194420	194450	+	30	TVAG_494490	Clan MA, family M8, leishmanolysin-like metallopeptidase	VEuPathDB	no
DS113231	23206	23211	-	5	TVAG_319460	conserved hypothetical protein	VEuPathDB	yes
DS113231	27650	27682	-	32	TVAG_319480	conserved hypothetical protein	VEuPathDB	no
DS113231	28484	28546	-	62	TVAG_319490	mannosidase, endo-alpha, putative	VEuPathDB	no
DS113231	33182	33263	+	81	TVAG_319530	histone-lysine N-methyltransferase, bat/ehmt, putative	VEuPathDB	no
DS113231	42148	42164	-	16	TVAG_319570	conserved hypothetical protein	VEuPathDB	no
DS113231	83860	83924	+	64	TVAG_319760	conserved hypothetical protein	VEuPathDB	no
DS113231	91378	91410	+	32	TVAG_319800	conserved hypothetical protein	VEuPathDB	no
DS113231	91812	91836	-	24	TVAG_319810	conserved hypothetical protein	VEuPathDB	yes
DS113231	120925	120928	+	3	TVAG_319950	conserved hypothetical protein	VEuPathDB	no
DS113231	128858	128962	+	104	TVAG_319990	CAMK family protein kinase	VEuPathDB	no
DS113231	133598	133631	-	33	TVAG_320010	iron dehydrogenase, putative	VEuPathDB	no
DS113231	143866	143880	+	14	TVAG_320050	AMP dependent CoA ligase, putative	VEuPathDB	no
DS113231	183681	183722	-	41	TVAG_320200	Rab5b, putative	VEuPathDB	no
DS113231	193382	193471	+	89	TVAG_320220	conserved hypothetical protein	VEuPathDB	no
DS113232	68	545	+	477	TVAG_TEG_DS113232_1_1	Maverick transposable element protein, similar to viral structural protein S3 and structurally similar to PRD1 capsid protein	VEuPathDB	no
DS113232	17369	17394	-	25	TVAG_266310	conserved hypothetical protein	VEuPathDB	no
DS113232	17862	18069	-	207	TVAG_266320	conserved hypothetical protein	VEuPathDB	no
DS113232	30470	30482	+	12	TVAG_266350	conserved hypothetical protein	VEuPathDB	no
DS113232	50249	50267	-	18	TVAG_266440	conserved hypothetical protein	VEuPathDB	no
DS113232	69801	70305	-	504	TVAG_TEG_DS113232_4_1	mariner transposase	VEuPathDB	no
DS113232	83481	83504	-	23	TVAG_266630	methionine-tRNA synthetase, putative	VEuPathDB	no
DS113232	139446	139449	+	3	TVAG_266830	cohesin subunit Smc1	VEuPathDB	no
DS113232	142068	142152	-	84	TVAG_266850	30S ribosomal protein S28e, putative	VEuPathDB	yes
DS113232	183280	184281	-	1001	TVAG_TEG_DS113232_6_1	mariner transposase	VEuPathDB	no
DS113233	41071	41087	+	16	TVAG_291380	conserved hypothetical protein	VEuPathDB	no
DS113233	42953	43009	+	56	TVAG_291390	conserved hypothetical protein	VEuPathDB	no
DS113233	44220	44322	-	102	TVAG_291410	impact, putative	VEuPathDB	no
DS113233	47703	47751	-	48	TVAG_291440	ATP-dependent RNA helicase, putative	VEuPathDB	no
DS113233	51736	51759	-	23	TVAG_291460	40S ribosomal protein S17, putative	VEuPathDB	no
DS113233	70256	70303	-	47	TVAG_291520	leucine-rich repeat protein, BspA family	VEuPathDB	no
DS113233	72094	72181	-	87	TVAG_291530	conserved hypothetical protein	VEuPathDB	no
DS113233	77027	77075	+	48	TVAG_291570	centrin, putative	VEuPathDB	no
DS113233	78495	78549	+	54	TVAG_291580	conserved hypothetical protein	VEuPathDB	yes
DS113233	94021	94061	+	40	TVAG_291620	protein kinase inhibitor, putative	VEuPathDB	no
DS113233	101604	101707	+	103	TVAG_TEG_DS113233_2_1	mariner transposase	VEuPathDB	no
DS113233	105143	105288	-	145	TVAG_291680	AGC family protein kinase	VEuPathDB	no
DS113233	111106	111256	-	150	TVAG_291690	60S acidic ribosomal protein P2, putative	VEuPathDB	yes
DS113233	113689	113713	-	24	TVAG_291710	proliferating cell nuclear antigen, putative	VEuPathDB	no
DS113233	130677	130811	+	134	TVAG_291790	conserved hypothetical protein	VEuPathDB	no
DS113233	142755	142762	+	7	TVAG_291860	CMGC family protein kinase	VEuPathDB	no
DS113233	148072	148092	+	20	TVAG_291880	Rabx19 protein, putative	VEuPathDB	no
DS113233	155245	155310	+	65	TVAG_291920	heat shock protein 70kD, putative	VEuPathDB	no
DS113233	183781	183792	+	11	TVAG_292010	programmed cell death protein, putative	VEuPathDB	yes
DS113233	186235	186254	-	19	TVAG_292030	conserved hypothetical protein	VEuPathDB	no
DS113233	200160	200191	+	31	TVAG_292080	conserved hypothetical protein	VEuPathDB	no
DS113234	12516	12593	-	77	TVAG_303150	5'->3' exoribonuclease, putative	VEuPathDB	no
DS113234	24570	24601	+	31	TVAG_303180	heat shock protein 70 (HSP70)-4, putative	VEuPathDB	no
DS113234	60976	61023	-	47	TVAG_303360	conserved hypothetical protein	VEuPathDB	no
DS113234	105982	106031	+	49	TVAG_303530	conserved hypothetical protein	VEuPathDB	no
DS113234	110434	110538	+	104	TVAG_303550	conserved hypothetical protein	VEuPathDB	no
DS113234	117583	117660	+	77	TVAG_303590	conserved hypothetical protein	VEuPathDB	no
DS113234	118425	118453	-	28	TVAG_303600	chaperonin containing t-complex protein 1, zeta subunit, tcpz, putative	VEuPathDB	no
DS113234	131583	131655	+	72	TVAG_303670	conserved hypothetical protein	VEuPathDB	no
DS113234	152394	152410	-	16	TVAG_303760	Phosphatidylinositol transfer protein beta isoform, putative	VEuPathDB	yes
DS113234	179736	179859	-	123	TVAG_303860	conserved hypothetical protein	VEuPathDB	yes
DS113234	185823	186365	+	542	TVAG_303880	MYB3r3, putative	VEuPathDB	no
DS113234	191580	191685	+	105	TVAG_303900	conserved hypothetical protein	VEuPathDB	no
DS113235	16695	16782	+	87	TVAG_296920	conserved hypothetical protein	VEuPathDB	no
DS113235	22498	22514	-	16	TVAG_296960	conserved hypothetical protein	VEuPathDB	no
DS113235	53606	53630	+	24	TVAG_297100	CAMK family protein kinase	VEuPathDB	no
DS113235	67077	67481	-	404	TVAG_TEG_DS113235_2_1	mariner transposase	VEuPathDB	no
DS113235	111666	112608	-	942	TVAG_TEG_DS113235_3_1	mariner transposase	VEuPathDB	no
DS113235	128844	128902	-	58	TVAG_297400	conserved hypothetical protein	VEuPathDB	no
DS113235	141551	141584	-	33	TVAG_297470	60S ribosomal protein L9, putative	VEuPathDB	no
DS113235	149413	149463	-	50	TVAG_297490	Clathrin light chain, putative	VEuPathDB	no
DS113235	157071	157127	-	56	TVAG_297540	cohesin subunit Rad21B	VEuPathDB	no
DS113235	185235	185254	+	19	TVAG_297620	DNAj/HSP40, putative	VEuPathDB	no
DS113235	190294	190338	-	44	TVAG_297650	grpe protein, putative	VEuPathDB	no
DS113236	5928	5934	-	6	TVAG_280450	conserved hypothetical protein	VEuPathDB	no
DS113236	10017	10083	-	66	TVAG_280470	AP-2 complex subunit beta-1, putative	VEuPathDB	no
DS113236	31310	31325	+	15	TVAG_280530	dullard protein, putative	VEuPathDB	no
DS113236	77376	77377	-	1	TVAG_280790	cdp-diacylglycerol--glycerol-3-phosphate 3-phosphatidyltransferase, putative	VEuPathDB	yes
DS113236	95251	95749	-	498	TVAG_280820	conserved hypothetical protein	VEuPathDB	no
DS113236	100864	100900	-	36	TVAG_280840	conserved hypothetical protein	VEuPathDB	yes
DS113236	151866	151885	-	19	TVAG_281070	phosphofructokinase, putative	VEuPathDB	no
DS113236	169610	169639	-	29	TVAG_281100	conserved hypothetical protein	VEuPathDB	no
DS113237	19169	19192	+	23	TVAG_149990	casein kinase, putative	VEuPathDB	no
DS113237	28330	28391	+	61	TVAG_150030	conserved hypothetical protein	VEuPathDB	no
DS113237	32193	32243	-	50	TVAG_150040	conserved hypothetical protein	VEuPathDB	no
DS113237	48533	48865	+	332	TVAG_150090	geranylgeranyl pyrophosphate synthase, putative	VEuPathDB	no
DS113237	60296	60364	-	68	TVAG_150130	conserved hypothetical protein	VEuPathDB	no
DS113237	74031	74118	-	87	TVAG_150170	ormdl proteins, putative	VEuPathDB	no
DS113237	76511	76511	-	0	TVAG_150190	conserved hypothetical protein	VEuPathDB	no
DS113237	80530	80583	+	53	TVAG_150210	conserved hypothetical protein	VEuPathDB	no
DS113237	96004	96028	-	24	TVAG_150280	conserved hypothetical protein	VEuPathDB	no
DS113237	99395	99699	+	304	TVAG_150300	conserved hypothetical protein	VEuPathDB	yes
DS113237	124722	124739	+	17	TVAG_150420	conserved hypothetical protein	VEuPathDB	no
DS113237	124753	124812	-	59	TVAG_150430	conserved hypothetical protein	VEuPathDB	no
DS113237	174704	174799	-	95	TVAG_150680	RAB, putative	VEuPathDB	no
DS113237	194065	195005	-	940	TVAG_TEG_DS113237_1_1	mariner transposase	VEuPathDB	no
DS113238	16418	16435	+	17	TVAG_447130	axonemal dynein light chain, putative	VEuPathDB	no
DS113238	16710	16735	-	25	TVAG_447140	conserved hypothetical protein	VEuPathDB	yes
DS113238	18784	18799	+	15	TVAG_447150	mitotic inducer phosphatase CDC25, putative	VEuPathDB	no
DS113238	55005	55061	-	56	TVAG_447320	conserved hypothetical protein	VEuPathDB	no
DS113238	70846	70889	-	43	TVAG_447370	mRNA turnover protein 4 mrt4, putative	VEuPathDB	yes
DS113238	89040	89049	-	9	TVAG_447450	nucleotide-binding protein, putative	VEuPathDB	no
DS113238	96513	96531	+	18	TVAG_447480	peptide N-glycanase, putative	VEuPathDB	no
DS113238	109761	109820	-	59	TVAG_447550	conserved hypothetical protein	VEuPathDB	no
DS113238	115281	115422	+	141	TVAG_447560	BAS1, putative	VEuPathDB	no
DS113238	118002	118051	+	49	TVAG_447580	conserved hypothetical protein	VEuPathDB	no
DS113238	121561	121664	+	103	TVAG_447600	conserved hypothetical protein	VEuPathDB	no
DS113238	133573	133624	-	51	TVAG_447670	cohesin subunit Pds5	VEuPathDB	no
DS113238	159900	159927	-	27	TVAG_447770	ankyrin repeat-containing protein, putative	VEuPathDB	no
DS113238	165173	165203	+	30	TVAG_447780	conserved hypothetical protein	VEuPathDB	no
DS113238	169146	169185	-	39	TVAG_447820	ribosomal protein L13, putative	VEuPathDB	no
DS113238	171542	171756	-	214	TVAG_447850	histone H2b, putative	VEuPathDB	yes
DS113238	172731	172803	+	72	TVAG_447860	histone H2a, putative	VEuPathDB	yes
DS113238	194473	194478	-	5	TVAG_447950	conserved hypothetical protein	VEuPathDB	no
DS113239	10298	10343	+	45	TVAG_066610	WD-repeat protein, putative	VEuPathDB	no
DS113239	12132	12181	+	49	TVAG_066620	protein bangles and beads, putative	VEuPathDB	no
DS113239	45280	45319	-	39	TVAG_066760	ribosomal protein S15p/S13e, putative	VEuPathDB	no
DS113239	56544	56562	-	18	TVAG_066820	conserved hypothetical protein	VEuPathDB	no
DS113239	74264	74310	-	46	TVAG_066900	ubiquitin-conjugating enzyme E2-25kD, putative	VEuPathDB	no
DS113239	82896	82916	+	20	TVAG_066950	DNAj/HSP40, putative	VEuPathDB	no
DS113239	102965	102993	-	28	TVAG_067070	conserved hypothetical protein	VEuPathDB	no
DS113239	105094	105106	+	12	TVAG_067080	troponin C2, putative	VEuPathDB	no
DS113239	111149	111190	+	41	TVAG_067100	60S ribosomal protein L37, putative	VEuPathDB	yes
DS113239	163850	163874	-	24	TVAG_067370	60S ribosomal protein L35a, putative	VEuPathDB	no
DS113239	168433	168476	-	43	TVAG_067400	elongation factor 1-alpha, putative	VEuPathDB	no
DS113239	180895	181042	-	147	TVAG_067440	conserved hypothetical protein	VEuPathDB	yes
DS113239	194803	194899	+	96	TVAG_067520	conserved hypothetical protein	VEuPathDB	no
DS113240	28926	28984	+	58	TVAG_434050	60S ribosomal protein L7, putative	VEuPathDB	yes
DS113240	48047	48075	-	28	TVAG_434120	phosphoenolpyruvate carboxykinase, putative	VEuPathDB	no
DS113240	92307	92327	-	20	TVAG_434300	conserved hypothetical protein	VEuPathDB	no
DS113240	99174	99205	-	31	TVAG_434350	conserved hypothetical protein	VEuPathDB	no
DS113240	102398	102424	+	26	TVAG_434360	conserved hypothetical protein	VEuPathDB	no
DS113240	105323	105344	+	21	TVAG_434380	conserved hypothetical protein	VEuPathDB	no
DS113240	105904	105930	-	26	TVAG_434390	pyridoxal-5-phosphate phosphatase, putative	VEuPathDB	no
DS113240	130108	130401	+	293	TVAG_434480	condensin subunit Smc4	VEuPathDB	no
DS113240	139190	139215	-	25	TVAG_434540	ecotropic viral integration site, putative	VEuPathDB	no
DS113240	154057	154178	+	121	TVAG_434610	conserved hypothetical protein	VEuPathDB	no
DS113240	156572	156607	+	35	TVAG_434630	conserved hypothetical protein	VEuPathDB	no
DS113240	157892	157956	+	64	TVAG_434640	conserved hypothetical protein	VEuPathDB	no
DS113240	158117	158146	-	29	TVAG_434650	60S ribosomal protein L13a, putative	VEuPathDB	no
DS113240	188459	188658	+	199	TVAG_434790	STE family protein kinase	VEuPathDB	yes
DS113240	188897	188992	-	95	TVAG_434800	zinc-iron transporter, putative	VEuPathDB	no
DS113241	13866	13900	+	34	TVAG_347810	conserved hypothetical protein	VEuPathDB	no
DS113241	14425	14476	-	51	TVAG_347820	60S ribosomal protein L35, putative	VEuPathDB	yes
DS113241	47217	47240	-	23	TVAG_347960	40S ribosomal protein S26, putative	VEuPathDB	no
DS113241	71376	71423	-	47	TVAG_348090	40S ribosomal protein S3a, putative	VEuPathDB	no
DS113241	89015	89041	+	26	TVAG_348150	TKL family protein kinase	VEuPathDB	no
DS113241	123068	123084	+	16	TVAG_348300	conserved hypothetical protein	VEuPathDB	no
DS113241	126536	126599	-	63	TVAG_348320	60S acidic ribosomal protein P2, putative	VEuPathDB	no
DS113241	127419	127519	-	100	TVAG_348330	glycogen phosphorylase, putative	VEuPathDB	yes
DS113241	141314	141353	-	39	TVAG_348380	ef-hand domain (C-terminal) containing protein, putative	VEuPathDB	no
DS113241	179452	180391	+	939	TVAG_TEG_DS113241_6_1	mariner transposase	VEuPathDB	no
DS113242	20905	20928	-	23	TVAG_004440	cyclophillin, putative	VEuPathDB	no
DS113242	46063	46140	-	77	TVAG_004500	calmodulin-2, putative	VEuPathDB	no
DS113242	91089	91156	-	67	TVAG_004640	conserved hypothetical protein	VEuPathDB	no
DS113242	99772	100075	+	303	TVAG_004670	conserved hypothetical protein	VEuPathDB	no
DS113242	111364	111419	+	55	TVAG_004700	neutral sphingomyelinase (N-smase) activation associated factor fan, putative	VEuPathDB	no
DS113242	119852	120152	+	300	TVAG_004750	axonemal dynein beta heavy chain 9, putative	VEuPathDB	no
DS113242	124914	125069	-	155	TVAG_004780	conserved hypothetical protein	VEuPathDB	no
DS113242	141451	141483	-	32	TVAG_004830	leucine-rich repeat protein, BspA family	VEuPathDB	no
DS113243	22924	22976	+	52	TVAG_359510	conserved hypothetical protein	VEuPathDB	yes
DS113243	51297	52237	+	940	TVAG_TEG_DS113243_2_1	mariner transposase	VEuPathDB	no
DS113243	73719	73768	+	49	TVAG_359740	conserved hypothetical protein	VEuPathDB	yes
DS113243	91747	91873	-	126	TVAG_359800	60S ribosomal protein L34, putative	VEuPathDB	yes
DS113243	125606	125654	+	48	TVAG_359910	PIKK family atypical protein kinase	VEuPathDB	no
DS113243	138554	138607	+	53	TVAG_359960	conserved hypothetical protein	VEuPathDB	no
DS113243	139502	139513	-	11	TVAG_359970	conserved hypothetical protein	VEuPathDB	no
DS113243	147566	147592	+	26	TVAG_359980	conserved hypothetical protein	VEuPathDB	no
DS113243	149592	149594	+	2	TVAG_359990	deoxyhypusine synthase, putative	VEuPathDB	no
DS113243	163633	163650	-	17	TVAG_360040	conserved hypothetical protein	VEuPathDB	no
DS113243	174979	175231	+	252	TVAG_360080	conserved hypothetical protein	VEuPathDB	no
DS113243	181338	181415	+	77	TVAG_360110	conserved hypothetical protein	VEuPathDB	no
DS113243	191907	192378	-	471	TVAG_TEG_DS113243_3_1	mariner transposase	VEuPathDB	no
DS113244	46805	46879	+	74	TVAG_423170	heat shock protein 70 (HSP70)-interacting protein, putative	VEuPathDB	no
DS113244	49507	49943	+	436	TVAG_423180	serine/threonine-protein kinase TNNI3K, putative	VEuPathDB	no
DS113244	51079	51126	+	47	TVAG_423190	conserved hypothetical protein	VEuPathDB	no
DS113244	53206	53248	-	42	TVAG_423210	WD-repeat protein, putative	VEuPathDB	no
DS113244	78510	78572	-	62	TVAG_423320	60S ribosomal protein L13, putative	VEuPathDB	no
DS113244	89226	89284	-	58	TVAG_423410	Rho-associated protein kinase, putative	VEuPathDB	no
DS113244	103132	103210	-	78	TVAG_423440	conserved hypothetical protein	VEuPathDB	no
DS113244	109421	109447	-	26	TVAG_423460	conserved hypothetical protein	VEuPathDB	no
DS113244	117688	117735	-	47	TVAG_423490	eukaryotic translation initiation factor 2 gamma subunit, putative	VEuPathDB	yes
DS113244	120715	120806	-	91	TVAG_423500	conserved hypothetical protein	VEuPathDB	no
DS113244	131044	131095	+	51	TVAG_423520	RAB, putative	VEuPathDB	no
DS113244	171657	171707	+	50	TVAG_423660	ribosome biogenesis protein tsr1, putative	VEuPathDB	no
DS113245	26242	26258	+	16	TVAG_340730	DTDP-4-dehydrorhamnose 3,5-epimerase, putative	VEuPathDB	no
DS113245	27564	27632	+	68	TVAG_340740	Family T1, proteasome alpha subunit, threonine peptidase	VEuPathDB	yes
DS113245	33851	34248	+	397	TVAG_340770	hypothetical protein	VEuPathDB	no
DS113245	60419	60467	+	48	TVAG_340860	Rab7g protein, putative	VEuPathDB	no
DS113245	90385	90955	-	570	TVAG_TEG_DS113245_5_1	mariner transposase	VEuPathDB	no
DS113245	133035	133059	+	24	TVAG_341090	30S ribosomal protein S13p, putative	VEuPathDB	no
DS113245	137861	137874	+	13	TVAG_341110	conserved hypothetical protein	VEuPathDB	no
DS113245	174122	174195	-	73	TVAG_341260	Rabx26 protein, putative	VEuPathDB	no
DS113245	183030	183046	+	16	TVAG_341300	ankyrin repeat and socs box protein, putative	VEuPathDB	no
DS113245	187374	187390	+	16	TVAG_341330	conserved hypothetical protein	VEuPathDB	no
DS113245	188231	188427	-	196	TVAG_341350	histone H4, putative	VEuPathDB	yes
DS113245	189345	189575	+	230	TVAG_341360	centromeric histone H3 htr12, putative	VEuPathDB	yes
DS113245	192524	192548	+	24	TVAG_341380	nucleoside diphosphate kinase, putative	VEuPathDB	no
DS113246	58501	58513	+	12	TVAG_RG_DS113246_15	hypothetical protein	VEuPathDB	no
DS113246	73518	73896	+	378	TVAG_465180	CMGC family protein kinase	VEuPathDB	no
DS113246	86179	86213	-	34	TVAG_465230	dihydrodiol dehydrogenase, putative	VEuPathDB	no
DS113246	90449	90468	-	19	TVAG_465250	Clan SB, family S8, subtilisin-like serine peptidase	VEuPathDB	no
DS113247	13872	13918	+	46	TVAG_277870	conserved hypothetical protein	VEuPathDB	no
DS113247	15248	15299	+	51	TVAG_277880	conserved hypothetical protein	VEuPathDB	no
DS113247	18128	18149	+	21	TVAG_277900	conserved hypothetical protein	VEuPathDB	no
DS113247	19775	19819	-	44	TVAG_277920	CAMK family protein kinase	VEuPathDB	no
DS113247	21544	21555	-	11	TVAG_277930	conserved hypothetical protein	VEuPathDB	no
DS113247	26478	26501	-	23	TVAG_277940	40S ribosomal protein S26, putative	VEuPathDB	no
DS113247	27227	27282	-	55	TVAG_277950	conserved hypothetical protein	VEuPathDB	no
DS113247	106144	106223	+	79	TVAG_278300	conserved hypothetical protein	VEuPathDB	no
DS113247	132224	132260	+	36	TVAG_278460	conserved hypothetical protein	VEuPathDB	no
DS113247	150098	150118	-	20	TVAG_278520	polyadenylate-binding protein, putative	VEuPathDB	no
DS113247	155646	155680	-	34	TVAG_278540	inositol monophosphatase, putative	VEuPathDB	yes
DS113248	15716	15797	+	81	TVAG_261950	conserved hypothetical protein	VEuPathDB	yes
DS113248	20339	20407	+	68	TVAG_261970	carbamate kinase, putative	VEuPathDB	no
DS113248	23840	23846	-	6	TVAG_262010	ankyrin repeat-containing protein, putative	VEuPathDB	no
DS113248	25987	26081	+	94	TVAG_262020	conserved hypothetical protein	VEuPathDB	no
DS113248	55712	55750	+	38	TVAG_262130	ankyrin repeat-containing protein, putative	VEuPathDB	no
DS113248	75864	75892	+	28	TVAG_262240	60S ribosomal protein L31, putative	VEuPathDB	no
DS113248	79989	80078	+	89	TVAG_262270	conserved hypothetical protein	VEuPathDB	no
DS113248	89538	89644	-	106	TVAG_262320	conserved hypothetical protein	VEuPathDB	no
DS113248	96257	97197	+	940	TVAG_TEG_DS113248_2_1	mariner transposase	VEuPathDB	no
DS113248	101170	101259	+	89	TVAG_262360	conserved hypothetical protein	VEuPathDB	no
DS113248	101558	101610	-	52	TVAG_262370	conserved hypothetical protein	VEuPathDB	no
DS113248	110499	111439	-	940	TVAG_TEG_DS113248_3_1	mariner transposase	VEuPathDB	no
DS113248	146643	146887	-	244	TVAG_262470	clathrin coat assembly protein ap19, putative	VEuPathDB	yes
DS113249	56053	56138	+	85	TVAG_165150	sterol regulatory element binding protein cleavage-activating protein, putative	VEuPathDB	yes
DS113249	64788	64804	+	16	TVAG_165170	conserved hypothetical protein	VEuPathDB	no
DS113249	88950	89002	+	52	TVAG_165240	conserved hypothetical protein	VEuPathDB	no
DS113249	103121	103259	+	138	TVAG_165290	conserved hypothetical protein	VEuPathDB	no
DS113249	107556	107567	+	11	TVAG_165310	conserved hypothetical protein	VEuPathDB	no
DS113249	112814	112830	-	16	TVAG_165320	conserved hypothetical protein	VEuPathDB	no
DS113249	117316	117358	+	42	TVAG_165340	succinate thiokinase a subunit	VEuPathDB	no
DS113249	160091	160117	-	26	TVAG_165530	STE family protein kinase	VEuPathDB	no
DS113249	162239	162261	-	22	TVAG_165540	CK1 family protein kinase	VEuPathDB	no
DS113249	174857	174941	-	84	TVAG_165580	DNAj/HSP40, putative	VEuPathDB	no
DS113249	178913	178989	+	76	TVAG_165600	conserved hypothetical protein	VEuPathDB	no
DS113249	180288	180311	+	23	TVAG_165610	peroxiredoxin, putative	VEuPathDB	no
DS113249	191721	191747	-	26	TVAG_165690	peroxiredoxin, putative	VEuPathDB	no
DS113250	35356	35462	-	106	TVAG_159730	Rab78, putative	VEuPathDB	yes
DS113250	47153	47576	-	423	TVAG_159770	conserved hypothetical protein	VEuPathDB	no
DS113250	52232	52321	+	89	TVAG_159780	50S ribosomal protein L15e, putative	VEuPathDB	no
DS113250	52601	52718	-	117	TVAG_159790	prefoldin subunit, putative	VEuPathDB	yes
DS113250	57295	57329	+	34	TVAG_159810	small GTPase RAB, putative	VEuPathDB	no
DS113250	58778	58805	+	27	TVAG_159830	40S ribosomal protein S23, putative	VEuPathDB	no
DS113250	61659	61722	+	63	TVAG_159850	CK1 family protein kinase	VEuPathDB	no
DS113250	87178	87289	-	111	TVAG_159980	ubiquitin, putative	VEuPathDB	yes
DS113250	110680	110704	+	24	TVAG_160060	actin, putative	VEuPathDB	no
DS113250	113019	113057	-	38	TVAG_160090	conserved hypothetical protein	VEuPathDB	no
DS113250	120143	120178	+	35	TVAG_160120	conserved hypothetical protein	VEuPathDB	no
DS113250	126740	126781	-	41	TVAG_160160	60S ribosomal protein L23a, putative	VEuPathDB	no
DS113250	137567	137615	-	48	TVAG_160210	conserved hypothetical protein	VEuPathDB	no
[truncated: 8,063 more rows]

## Sheet: T. foetus 3'UTR annotation
chrom	3'utr_start	3'utr_end	strand	3'utr_length	gene_id	description	source	alternative_polyadentlation
[truncated: 6,046 more rows]

[truncated: 3 more sheets: G. lamblia A 3'UTR annotation, G. lamblia B 3'UTR annotation, G. muris 3'UTR annotation]
