# Supplementary material for: Evolutionary dynamics of polyadenylation signals and their recognition strategies in protists
Source: HighWire-hosted journal article supplement (doi:10.1101/gr.279526.124), 2024-09-26
Supplement: Supplemental_Table_S2.xlsx [file Supplemental_Table_S2.xlsx]

## Sheet: Legend
Supplemental Table S2. Additional measurement of ML models performance.
Giardia 8,10,12-mer gkm-SVM performance
Comparison of gkm-SVM model performances for Giardia lamblia A, Giardia lamblia B and Giardia muris, when using different k-mer lengths (8-, 10- and 12-mers).
F1 score was used for performance measurement.
Related to Figure 4D, 5A, Supplemental Figure S3C
Ng, Tv ,Tf gkm-SVM performance
Comparison matrices of gkm-SVM model performances for Naegleria gruberi, Trichomonas vaginalis and Tritrichomonas foetus when using different subsets of negative sequences..
F1 score was used for performance measurement.
Related to Figure 6A.
Tv and Tf linear model performance
Comparison of variance explained by linear models with or without interactions for Trichomonas vaginalis and Tritrichomonas foetus.
Related to Figure 6A.

## Sheet: Giardia 8,10,12-mer gkm-SVM per
Organism	F1 8mers	F1 10mers	F1 12mers
G. lamblia A	0.9585	0.9821	0.9781
G. lamblia B	0.9855	0.997	0.9945
G. muris	0.9965	0.999	0.999

## Sheet: Ng, Tv ,Tf gkm-SVM performance
N. gruberi F1
train	subset	1	2	3	4	5
test	1	0.9575	0.8867	0.8965	0.8997	0.8912
	2	0.8901	0.9559	0.8931	0.8971	0.8892
	3	0.8946	0.8841	0.9572	0.8961	0.8909
	4	0.8905	0.8844	0.8918	0.9609	0.8903
	5	0.8905	0.8842	0.8934	0.8977	0.9587
T. vaginalis F1
train	subset	1	2	3	4	5
test	1	0.78	0.7804	0.7787	0.7691	0.7675
	2	0.7939	0.7957	0.7884	0.7852	0.7808
	3	0.7965	0.7997	0.7938	0.7833	0.785
	4	0.7958	0.7955	0.7911	0.7855	0.7822
	5	0.7969	0.7975	0.7934	0.7857	0.7832
T. foetus F1
train	subset	1	2	3	4	5
test	1	0.7785	0.7768	0.7884	0.7835	0.7847
	2	0.7992	0.7902	0.804	0.799	0.7988
	3	0.8006	0.7929	0.8026	0.8034	0.8013
	4	0.7983	0.7898	0.7991	0.7964	0.7988
	5	0.7971	0.792	0.8028	0.7997	0.8017

## Sheet: Tv and Tf linear model performa
Organism	Linear model	Adjusted R2
T. vaginalis	without interactions	0.57
T. vaginalis	with interactions	0.57
T. foetus	without interactions	0.55
T. foetus	with interactions	0.55
